# Supplementary material for: A comparative analysis of fruit fly and human glutamate dehydrogenases in Drosophila melanogaster sperm development
Source: Frontiers journal article supplement (doi:10.3389/fcell.2023.1281487), 2023-11-02

## Supplementary Figure S2

## Mitochondrial signal peptide (Mastorodemos 2009)

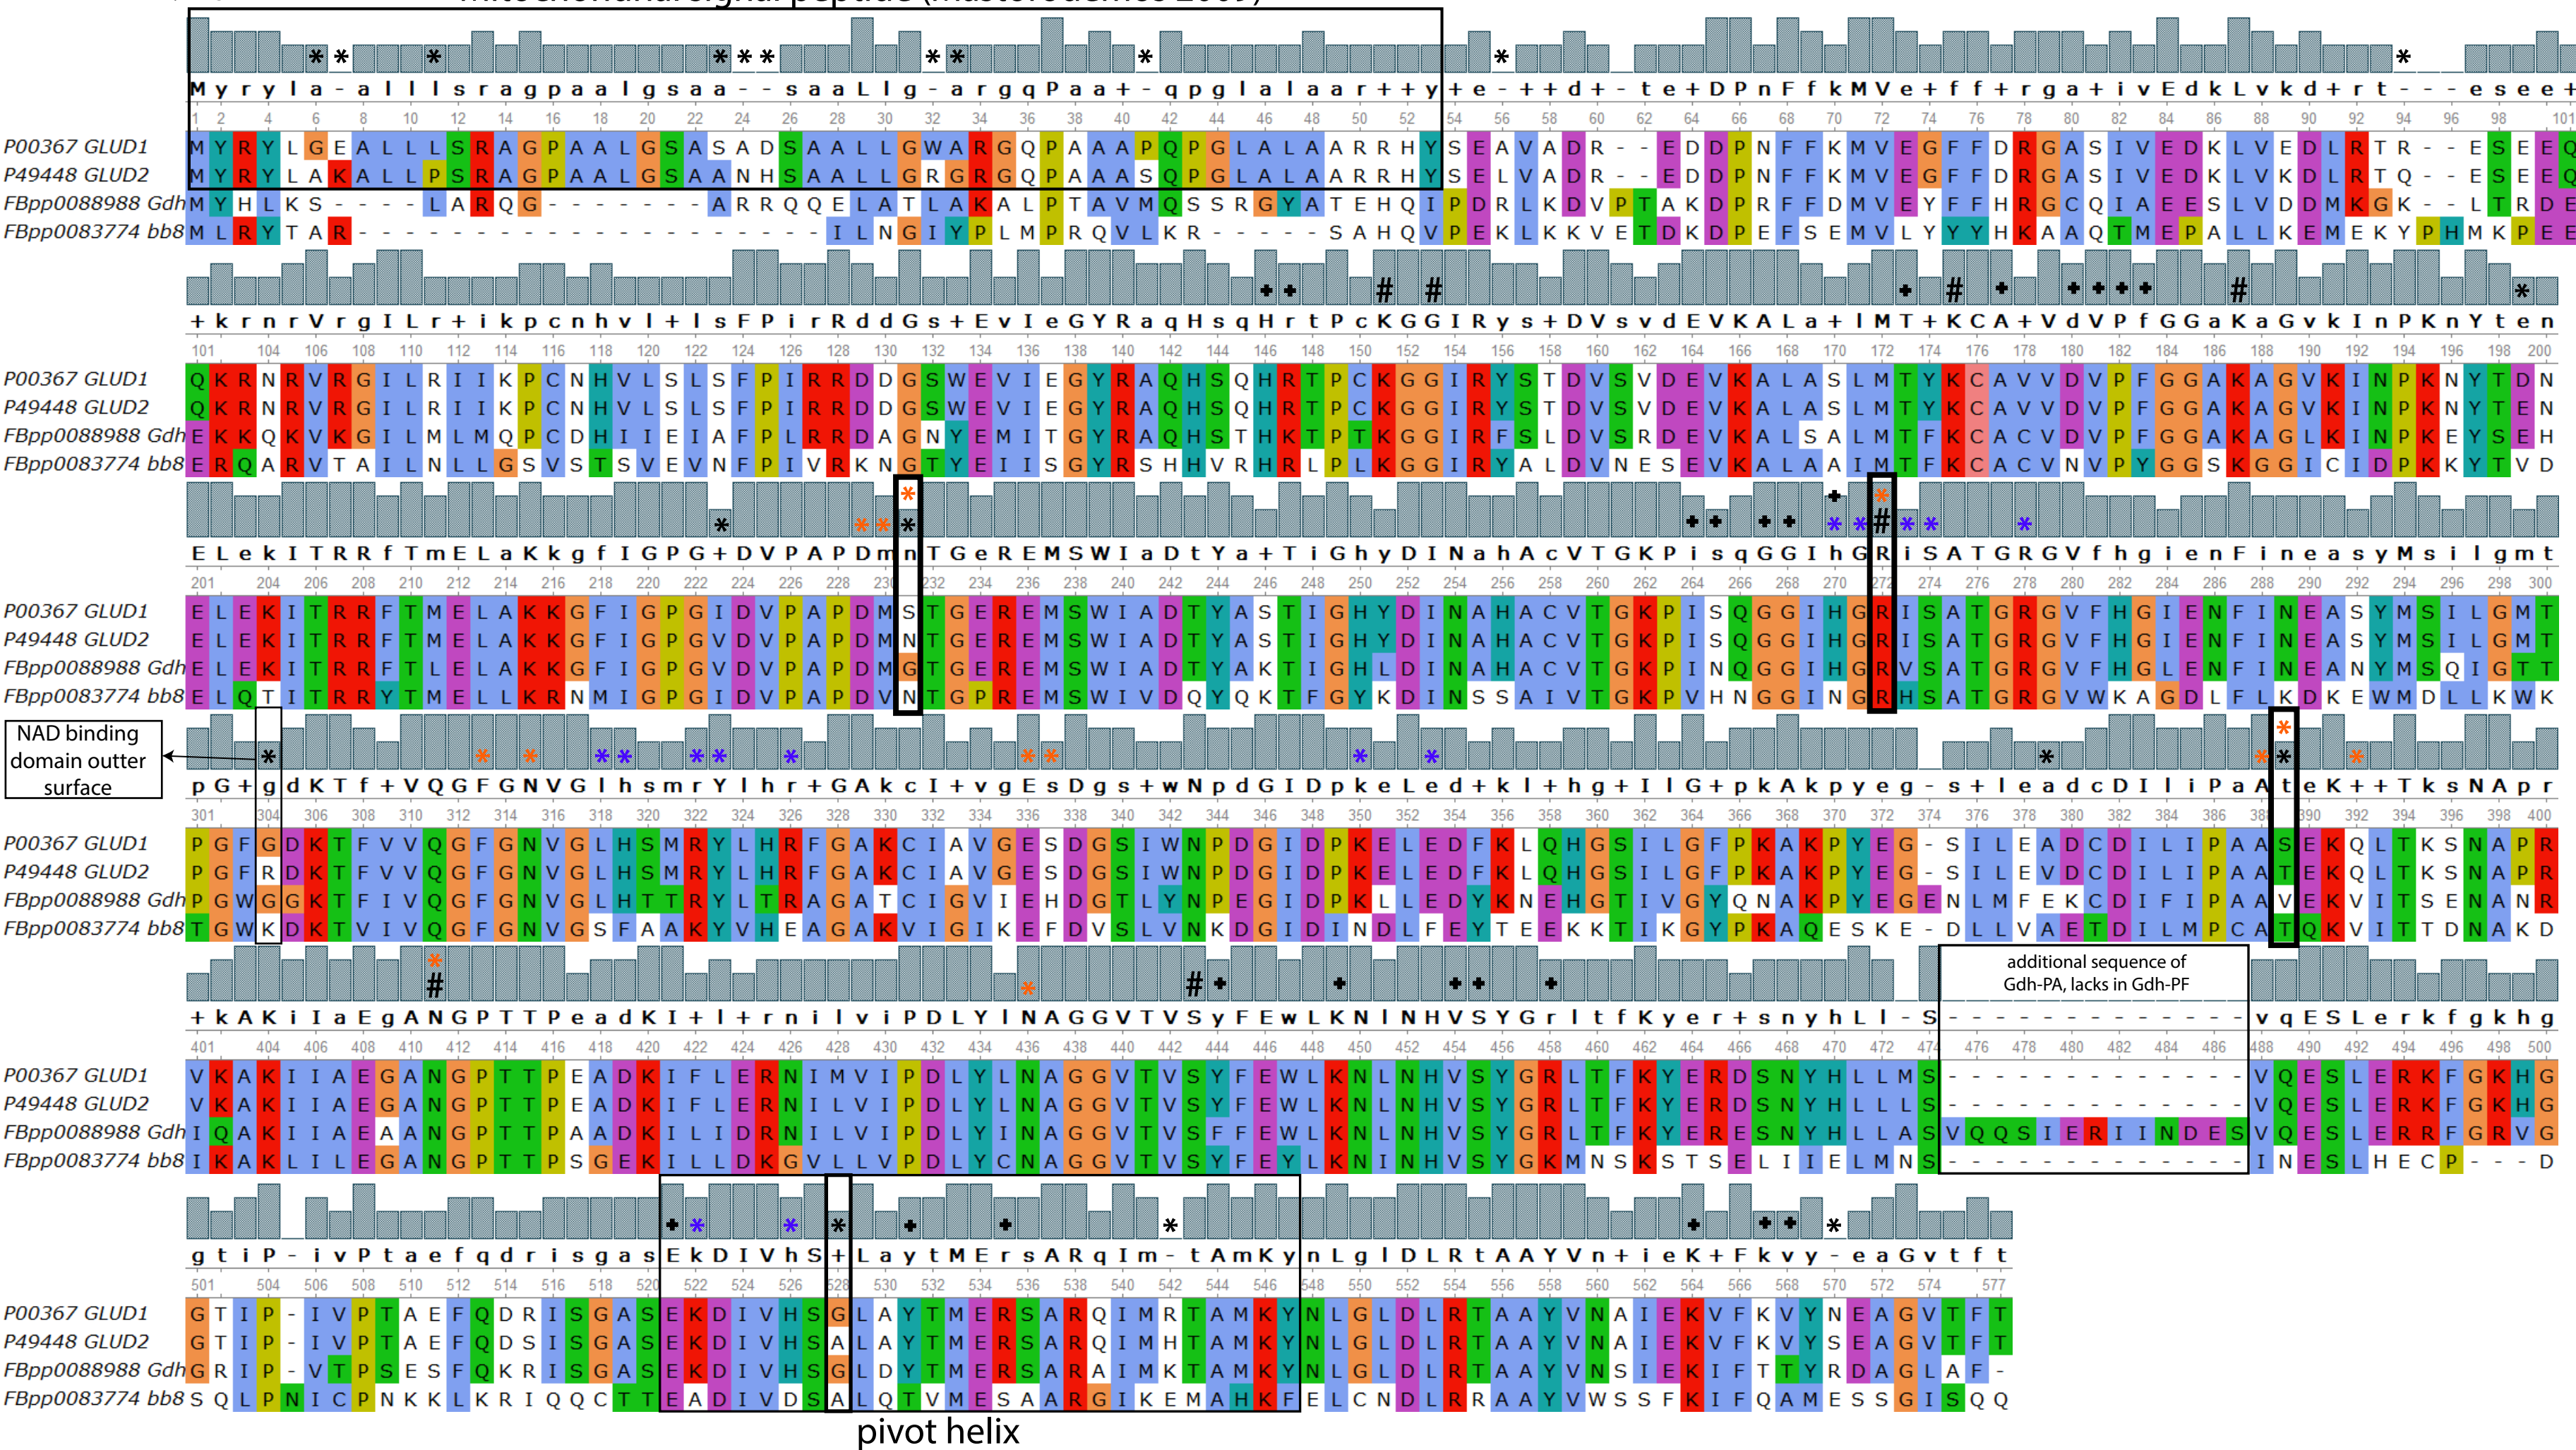

Aminoacid different in GLUD1 and Glud2 \* GTP binding pocket conserved AA site \* ADP binding pocket conserved AA site +

| $\alpha$ -ketoglutarate pocket conserved AA site# | NAD binding pocket conserved AA site * | Site of potential interest |
|---------------------------------------------------|----------------------------------------|----------------------------|
| 1                                                 | 1                                      |                            |
| 2                                                 | 2                                      |                            |
| 3                                                 | 3                                      |                            |
| 4                                                 | 4                                      |                            |
| 5                                                 | 5                                      |                            |
| 6                                                 | 6                                      |                            |
| 7                                                 | 7                                      |                            |
| 8                                                 | 8                                      |                            |
| 9                                                 | 9                                      |                            |
| 10                                                | 10                                     |                            |
| 11                                                | 11                                     |                            |
| 12                                                | 12                                     |                            |
| 13                                                | 13                                     |                            |
| 14                                                | 14                                     |                            |
| 15                                                | 15                                     |                            |
| 16                                                | 16                                     |                            |
| 17                                                | 17                                     |                            |
| 18                                                | 18                                     |                            |
| 19                                                | 19                                     |                            |
| 20                                                | 20                                     |                            |
| 21                                                | 21                                     |                            |
| 22                                                | 22                                     |                            |
| 23                                                | 23                                     |                            |
| 24                                                | 24                                     |                            |
| 25                                                | 25                                     |                            |
| 26                                                | 26                                     |                            |
| 27                                                | 27                                     |                            |
| 28                                                | 28                                     |                            |
| 29                                                | 29                                     |                            |
| 30                                                | 30                                     |                            |
| 31                                                | 31                                     |                            |
| 32                                                | 32                                     |                            |
| 33                                                | 33                                     |                            |
| 34                                                | 34                                     |                            |
| 35                                                | 35                                     |                            |
| 36                                                | 36                                     |                            |
| 37                                                | 37                                     |                            |
| 38                                                | 38                                     |                            |
| 39                                                | 39                                     |                            |
| 40                                                | 40                                     |                            |
| 41                                                | 41                                     |                            |
| 42                                                | 42                                     |                            |
| 43                                                | 43                                     |                            |
| 44                                                | 44                                     |                            |
| 45                                                | 45                                     |                            |
| 46                                                | 46                                     |                            |
| 47                                                | 47                                     |                            |
| 48                                                | 48                                     |                            |
| 49                                                | 49                                     |                            |
| 50                                                | 50                                     |                            |
| 51                                                | 51                                     |                            |
| 52                                                | 52                                     |                            |
| 53                                                | 53                                     |                            |
| 54                                                | 54                                     |                            |
| 55                                                | 55                                     |                            |
| 56                                                | 56                                     |                            |
| 57                                                | 57                                     |                            |
| 58                                                | 58                                     |                            |
| 59                                                | 59                                     |                            |
| 60                                                | 60                                     |                            |
| 61                                                | 61                                     |                            |
| 62                                                | 62                                     |                            |
| 63                                                | 63                                     |                            |
| 64                                                | 64                                     |                            |
| 65                                                | 65                                     |                            |
| 66                                                | 66                                     |                            |
| 67                                                | 67                                     |                            |
| 68                                                | 68                                     |                            |
| 69                                                | 69                                     |                            |
| 70                                                | 70                                     |                            |
| 71                                                | 71                                     |                            |
| 72                                                | 72                                     |                            |
| 73                                                | 73                                     |                            |
| 74                                                | 74                                     |                            |
| 75                                                | 75                                     |                            |
| 76                                                | 76                                     |                            |
| 77                                                | 77                                     |                            |
| 78                                                | 78                                     |                            |
| 79                                                | 79                                     |                            |
| 80                                                | 80                                     |                            |
| 81                                                | 81                                     |                            |
| 82                                                | 82                                     |                            |
| 83                                                | 83                                     |                            |
| 84                                                | 84                                     |                            |
| 85                                                | 85                                     |                            |
| 86                                                | 86                                     |                            |
| 87                                                | 87                                     |                            |
| 88                                                | 88                                     |                            |
| 89                                                | 89                                     |                            |
| 90                                                | 90                                     |                            |
| 91                                                | 91                                     |                            |
| 92                                                | 92                                     |                            |
| 93                                                | 93                                     |                            |
| 94                                                | 94                                     |                            |
| 95                                                | 95                                     |                            |
| 96                                                | 96                                     |                            |
| 97                                                | 97                                     |                            |
| 98                                                | 98                                     |                            |
| 99                                                | 99                                     |                            |
| 100                                               | 100                                    |                            |

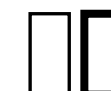

Supplement: Presentation_1.zip [file Presentation_1.zip]
