# Supplementary material for: A comparative analysis of fruit fly and human glutamate dehydrogenases in Drosophila melanogaster sperm development
Source: Frontiers journal article supplement (doi:10.3389/fcell.2023.1281487), 2023-11-02

Supplementary Figure S3

Tree scale: 1

Vertebrata

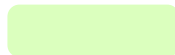

Drosophilidae

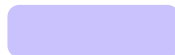

Culicidae

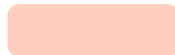

*Drosophila melanogaster*

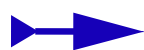

*Homo sapiens*

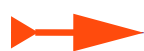

*Haliaeetus leucocephalus*

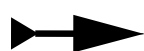

Bb8-like

GDH-like

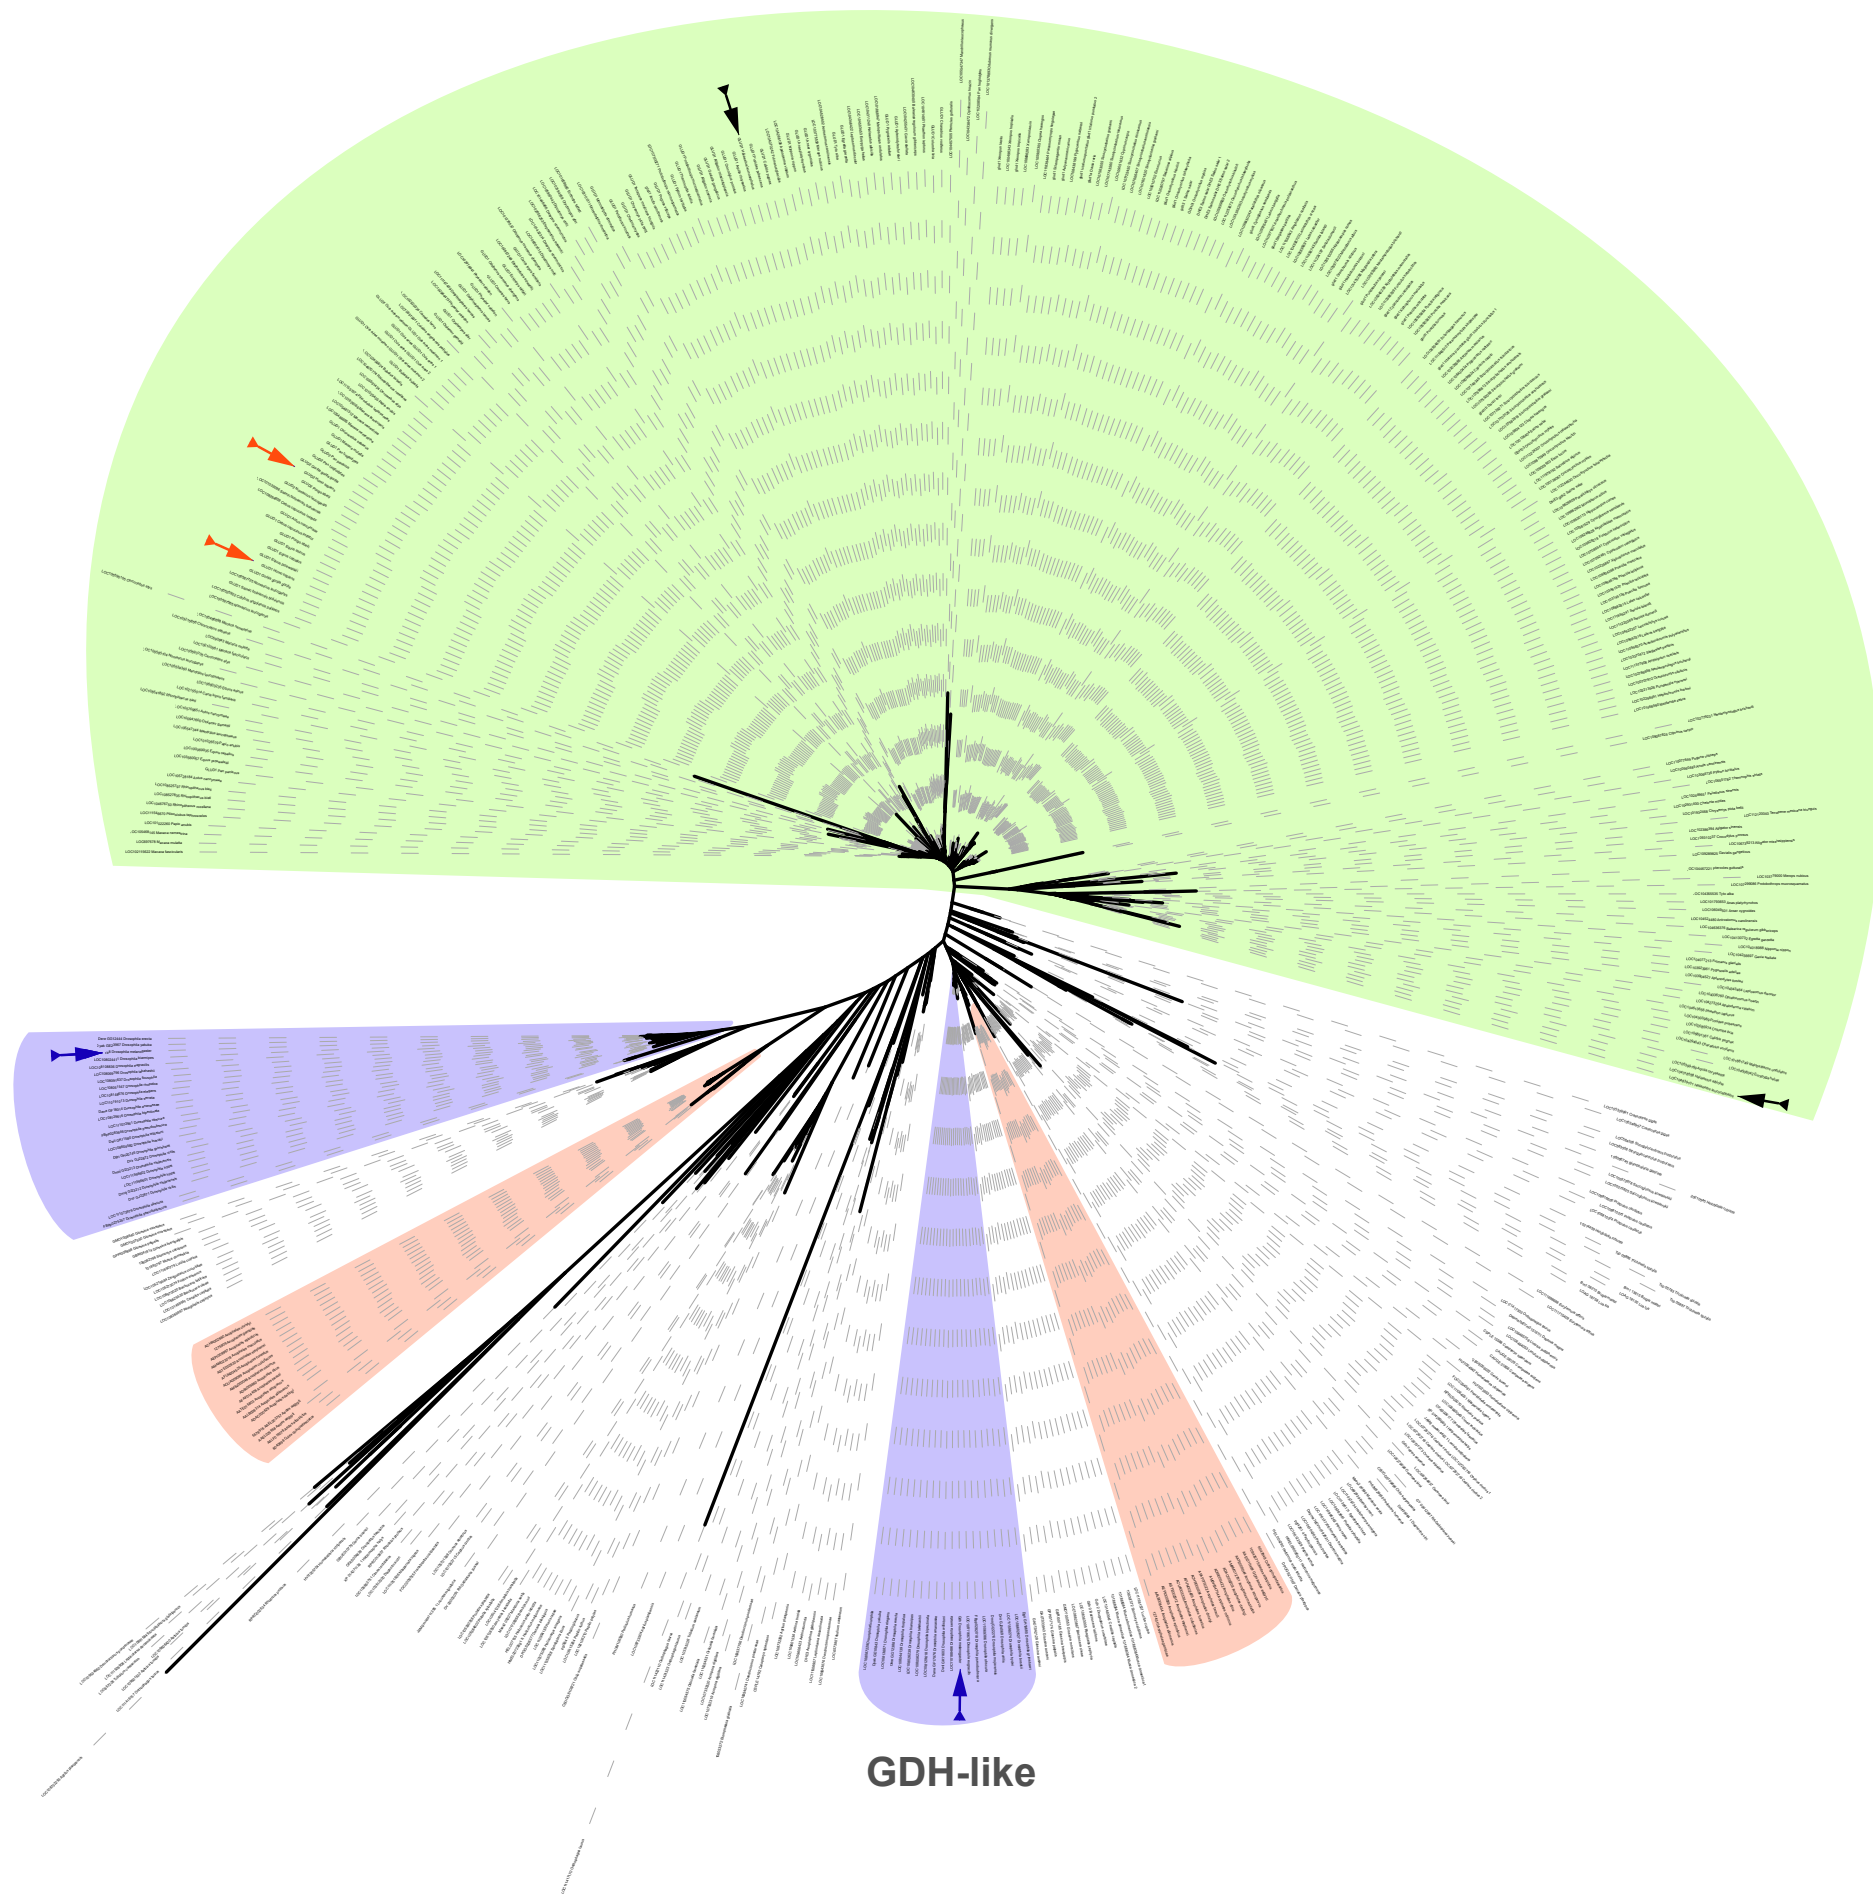

Supplement: Presentation_1.zip [file Presentation_1.zip]
