# Supplementary material for: A comparative analysis of fruit fly and human glutamate dehydrogenases in Drosophila melanogaster sperm development
Source: Front Cell Dev Biol. 2023 Nov 2;11:1281487. doi: 10.3389/fcell.2023.1281487 (PMC10652781; doi:10.3389/fcell.2023.1281487)
Supplement: Supplementary file 1 [file Table2.XLSX]

## Sheet: (A)_bb8_ancestry_subalign
Ancestry determination by FireProtASR
https://loschmidt.chemi.muni.cz/fireprotasr/
GTP - GTP binding pockets
NADH - NADH binding pockets
ADP - ADP binding pocket
akg - alpha ketoglutarate pocket
12	-	L	W	S	L	-	-	-	-	M	L	K	K	L	P	K	A	L	F	L	L	R	P	K	-	L	P	L	P	A	K	R	H	E	H	K	I	P	K	H	L	E	K	V	P	T	E		D
11	-	L	Y	S	L	-	-	-	-	M	L	R	S	L	P	K	T	L	F	S	G	R	S	-	-	-	Q	L	T	A	K	R	H	E	H	E	I	P	K	H	L	Q	K	V	P	T	E		D
10	M	L	R	S	L	T	N	T	L	F	R	G	R	S	-	-	Q	T	-	-	-	-	-	-	-	P	P	Q	L	S	K	R	H	E	H	K	M	P	E	H	L	K	K	V	E	T	D		D
9	M	L	R	S	L	T	N	T	L	F	R	G	R	S	-	-	Q	T	-	-	-	-	-	-	-	P	P	Q	L	S	K	R	H	E	H	K	M	P	E	H	L	K	K	V	E	T	D		D
8	M	L	R	N	L	T	N	T	L	F	R	G	R	S	-	-	-	Q	S	P	-	-	-	-	-	-	P	Q	L	S	K	R	H	E	H	K	M	P	E	H	L	K	K	V	E	T	D		D
7	M	L	R	N	L	T	K	T	L	F	R	M	R	S	-	-	-	Q	S	P	-	-	-	-	-	-	A	Q	L	S	K	R	Y	E	H	K	M	P	E	H	L	K	K	V	E	T	D		D
6	M	L	R	N	L	T	K	T	L	F	R	M	R	S	-	-	L	R	S	P	-	-	-	-	-	-	A	Q	L	S	K	R	Y	E	H	Q	M	P	E	H	L	K	K	V	E	T	D		D
5	M	L	R	N	L	T	R	I	L	H	R	M	R	S	-	-	L	S	-	-	-	-	-	-	-	P	M	Q	I	S	K	R	Y	E	H	Q	M	P	E	H	L	K	K	V	E	T	D		D
4	M	L	R	N	L	T	R	I	L	H	R	M	R	S	-	-	L	S	-	-	-	-	-	-	-	P	M	Q	I	S	V	R	Y	E	H	Q	M	P	E	H	L	K	K	V	E	T	D		D
3	M	L	R	N	V	T	R	I	L	H	R	M	R	L	-	-	L	S	-	-	-	-	-	-	-	P	K	Q	I	S	V	R	Y	E	H	Q	M	P	E	N	L	K	K	V	E	T	D		D
2	M	L	R	Y	A	E	R	L	L	K	R	V	Y	L	-	-	L	M	-	-	-	-	-	-	-	P	R	Q	V	L	K	R	Y	A	H	Q	M	P	E	K	L	K	K	V	E	T	D		D
1	M	L	R	Y	A	E	R	L	L	K	G	V	Y	P	-	-	L	M	-	-	-	-	-	-	-	P	R	Q	V	L	K	R	Y	A	H	Q	V	P	E	K	L	K	K	V	E	T	D		D
Bb8	M	L	R	Y	T	A	R	I	L	N	G	I	Y	P	-	-	L	M	-	-	-	-	-	-	-	P	R	Q	V	L	K	R	S	A	H	Q	V	P	E	K	L	K	K	V	E	T	D		D
	1	2	3	4	5	6	7	8	9	10	11	12	13	14			15	16								17	18	19	20	21	22	23	24	25	26	27	28	29	30	31	32	33	34	35	36	37	38		39
	1	2	3	4	5	6	7	8	9	10	11	12	13	14			15	16								17	18	19	20		22	23	24	25	26	27	28	29	30	31	32	33	34	35	36	37	38	39	40
	M	L	R	Y	T	A	R	I	L	N	G	I	Y	P			L	M								P	R	Q	V		K	R	S	A	H	Q	V	P	E	K	L	K	K	V	E	T	D	K	D
Phylogenetic tree based on Bb8-like protein sequences. (FireProtASR visualised by iTol)
[truncated: 494 more columns]

## Sheet: (B)_Bb8_ancestry_pockets
GTP pocket highligh
																					GTP		akg																		akg
		ADP	ADP	akg	akg	ADP	AKG	ADP	ADP	ADP	ADP	ADP	AKG	NADH	NADH	NADH	ADP	ADP	ADP	ADP	ADP	GTP	NADH	GTP	GTP	GTP	NADH	NADH	GTP	GTP	GTP	GTP	GTP	NADH	NADH	GTP	GTP	NADH	NADH	NADH	NADH	NADH	akg	ADP	ADP	ADP	ADP	ADP	ADP
	12	H	R	K	G	T	K	A	N	V	P	F	K	D	V	N	V	H	G	G	N	G	R	T	S	R	F	N	S	Y	K	F	E	E	L	N	M	A	T	V	N	N	S	Y	K	V	S	K	E
	11	H	R	K	G	T	K	A	N	V	P	F	K	D	V	N	V	H	G	G	N	G	R	T	S	R	F	N	S	Y	K	F	E	E	F	N	M	A	T	V	N	N	S	Y	K	V	S	K	E
	10	H	R	K	G	T	K	A	N	L	P	F	K	D	V	N	V	H	G	G	N	G	R	T	S	R	F	N	S	F	K	F	E	E	F	N	M	A	T	V	N	N	S	Y	K	V	S	K	E
	9	N	R	K	G	T	K	A	N	L	P	F	K	D	V	N	V	H	G	G	N	G	R	T	S	R	F	N	S	F	K	F	E	E	F	N	M	A	T	V	N	N	S	Y	K	V	S	K	E
	8	N	R	K	G	T	K	A	N	L	P	Y	K	D	V	N	V	H	G	G	N	G	R	T	S	R	F	N	S	F	K	F	E	E	F	N	F	A	T	V	N	N	S	Y	K	V	S	K	E
	7	N	R	K	G	T	K	A	N	L	P	Y	K	D	V	N	V	H	G	G	N	G	R	H	S	R	F	N	S	F	K	F	E	E	F	N	F	A	T	V	N	N	S	Y	K	V	S	K	E
	6	H	R	K	G	T	K	A	N	L	P	Y	K	D	V	N	V	H	G	G	N	G	R	H	S	R	F	N	S	F	K	F	E	E	F	N	F	A	T	V	N	N	S	Y	K	V	S	K	E
	5	H	R	K	G	T	K	A	N	L	P	Y	K	D	V	N	V	H	G	G	N	G	R	H	S	R	F	N	S	F	K	F	E	E	F	N	F	A	T	V	N	N	S	Y	K	V	S	K	E
	4	H	R	K	G	T	K	A	N	L	P	Y	K	D	V	N	V	H	G	G	N	G	R	H	S	R	F	N	S	F	K	F	E	E	F	N	F	A	T	V	N	N	S	Y	K	V	S	K	E
	3	H	R	K	G	T	K	A	N	L	P	Y	K	D	V	N	V	H	G	G	N	G	R	H	S	R	F	N	S	F	K	F	E	E	F	N	F	A	T	V	N	N	S	Y	K	V	S	K	E
	2	H	R	K	G	T	K	A	N	V	P	Y	K	D	V	N	I	H	G	G	N	G	R	H	S	R	F	N	S	F	K	Y	E	E	F	N	F	A	T	V	N	N	S	Y	K	V	S	K	E
	1	H	R	K	G	T	K	A	N	V	P	Y	K	D	V	N	I	H	G	G	N	G	R	H	S	R	F	N	S	F	K	Y	E	E	F	N	F	A	T	V	N	N	S	Y	K	V	S	K	E
	Bb8	H	R	K	G	T	K	A	N	V	P	Y	K	D	V	N	V	H	G	G	N	G	R	H	S	R	F	N	S	F	K	Y	E	E	F	N	F	A	T	V	N	N	S	Y	K	V	S	K	E
	Al_POS	119	120	124	126	146	148	150	153	154	155	156	160	202	203	204	237	238	240	241	243	244	245	246	247	251	286	288	291	292	295	296	299	309	310	323	326	360	361	364	383	408	415	416	421	426	427	430	477
Gdh	POS	133	134	138	140	160	162	164	167	168	169	170	174	216	217	218	251	252	254	255	257	258	259	260	261	265	300	302	305	306	309	310	313	323	324	337	340	375	376	379	398	423	430	431	436	441	442	445	494
	SEQ	H	K	K	G	T	K	A	D	V	P	F	K	D	M	G	I	N	G	G	H	G	R	V	S	R	F	N	L	H	R	Y	R	E	H	K	E	A	V	V	N	N	S	F	K	V	S	R	E
Bb8	POS	121	122	126	128	148	150	152	155	156	157	158	162	204	205	206	239	240	242	243	245	246	247	248	249	253	288	290	293	294	297	298	301	311	312	325	328	362	363	366	385	410	417	418	423	428	429	432	479
	SEQ	H	R	K	G	T	K	A	N	V	P	Y	K	D	V	N	V	H	G	G	N	G	R	H	S	R	F	N	S	F	K	Y	E	E	F	N	F	A	T	V	N	N	S	Y	K	V	S	K	E
GLUD	POS	142	143	147	149	169	171	173	176	177	178	179	183	225	226	227	260	261	263	264	266	267	268	269	270	274	309	311	314	315	318	319	322	332	333	346	349	383	384	387	406	431	438	439	444	449	450	453	502
GLUD1	SEQ	H	R	K	G	T	K	A	D	V	P	F	K	D	M	S	I	S	G	G	H	G	R	I	S	R	F	N	L	H	R	Y	R	E	S	K	E	A	S	Q	N	N	S	Y	K	V	S	R	E
GLUD2	SEQ	H	R	K	G	T	K	A	D	V	P	F	K	D	M	N	I	S	G	G	H	G	R	I	S	R	F	N	L	H	R	Y	R	E	S	K	E	A	T	Q	N	N	S	Y	K	V	S	R	E
	Pocket	ADP	ADP	akg	akg	ADP	akg	ADP	ADP	ADP	ADP	ADP	akg	NADH	NADH	NADH	ADP	ADP	ADP	ADP	GTP, ADP	GTP	akg, NADH	GTP	GTP	GTP	NADH	NADH	GTP	GTP	GTP	GTP	GTP	NADH	NADH	GTP	GTP	NADH	NADH	NADH	akg, NADH	NADH	akg	ADP	ADP	ADP	ADP	ADP	ADP
ConSerf COLOR score	Bb8 - Bb8-like	6	9	9	9	7	9	8	8	5	9	6	9	9	6	9	5	6	9	9	8	9	9	5	6	9	5	9	8	4	6	5	5	9	1	4	4	9	7	7	9	9	9	9	9	9	9	9	9
	Bb8 - ConSerf homology search	9	9	9	9	9	9	9	8	9	9	9	9	9	9	8	9	7	9	9	9	9	9	5	9	9	7	9	6	9	9	9	8	9	1	7	8	9	3	6	9	9	9	7	9	9	9	9	9
[truncated: 8 more columns]
