# Supplementary material for: A comparative analysis of fruit fly and human glutamate dehydrogenases in Drosophila melanogaster sperm development
Source: Front Cell Dev Biol. 2023 Nov 2;11:1281487. doi: 10.3389/fcell.2023.1281487 (PMC10652781; doi:10.3389/fcell.2023.1281487)
Supplement: Supplementary file 2 [file Table3.XLSX]

## Sheet: Legend
Amino Acid Conservation Scores - ConSurf
https://consurf.tau.ac.il/consurf_index.php		Models:	PDB:						Sheets:
		Bb8	Q9VCN3						Gdh_sum	Drosophila Gdh - conservation
Consurf homology search parameters:		Gdh	P54385						Bb8_sum	Drosophila Bb8 - conservation
HMMER 5X iteration		GLUD1	P00367						Dros_pockets	Drosophila Gdh and Bb8 pocket - conservation
150 closest sequences		GLUD2	P49448						GLUD_sum	Human GLUD1 and GLUD2 - conservation
									GLUD_pockets	Human GLUD1 and GLUD2 pocket - conservation
									Sum	Summary
Chart columns description:
- POS: The position of The AA in The SEQRES derived sequence.
- SEQ: The SEQRES derived sequence in one letter code.
- 3LATOM: The ATOM derived sequence in three letter code, including the AA's positions as they appear in the PDB file and the chain identifier.							Color code for models:
- SCORE: The normalized conservation scores.
- COLOR: The color scale representing the conservation scores (9 - conserved, 1 - variable).
- CONFIDENCE INTERVAL: When using the bayesian method for calculating rates, a confidence interval is assigned to each of the inferred evolutionary conservation scores.
- CONFIDENCE INTERVAL COLORS: When using The bayesian method for calculating rates. The COLOR scale representing The lower and upper bounds of The CONFIDENCE interval.
- MSA DATA: The number of aligned sequences having an amino acid (non-gapped) from the overall number of sequences at each position.
- RESIDUE VARIETY: The residues VARIETY at each position of The multiple sequence alignment.
If the difference between the colors of the CONFIDENCE INTERVAL COLORS is more than 3 or the msa number (under the column titled MSA) is less than 6, there is insufficient data and an * appears in the COLOR column.
Protein ID-s/names and species
Gdh				Bb8				GLUD1		GLUD2
Consurf homology search	Diptera Gdh-like	Diptera, mammalian	Diptera, Bb8 and Gdh-like	Consurf homology search	Diptera Bb8-like	Diptera, mammalian	Diptera Bb8 and Gdh like	Consurf homology search	GLUD1 Mammalian	Consurf homology search	GLUD2 Mammalian
P54385|1_562|9.7e-245|Brachycera	109430715_Aedes_albopictus	GLUD1_Aotus_nancymaae	AAEL025958_Aedes_aegypti	A0A6M2DEN7|29_546|5.9e-222|Pulicidae	AAEL025958_Aedes_aegypti	GLUD1_Aotus_nancymaae	AAEL025958_Aedes_aegypti	P49448|1_558|1.2e-254|Boreoeutheria	GLUD1_Aotus_nancymaae	P49448|1_558|9.1e-255|Boreoeutheria	LOC105728184_Aotus_nancymaae
A0A1J1IWE9|1_559|6.5e-239|Clunio_mar	AALB008454_Anopheles_albimanus	GLUD1_Bubalus_bubalis	5578916;AAEL003757_Aedes_aegypti	A0A6H5IKT7|22_554|6.6e-222|Chalcidoi	5578916;AAEL003757_Aedes_aegypti	GLUD1_Bubalus_bubalis	5578916;AAEL003757_Aedes_aegypti	H0WN67|1_562|6e-253|Otolemur_garnett	GLUD1_Bubalus_bubalis	UPI00057ADD25|1_562|2e-252|Camelus_b	LOC105709651_Aotus_nancymaae
A0A6P8ZAX9|1_549|3.6e-238|Arthropoda	AATE006544_Anopheles_atroparvus	GLUD1_Camelus_ferus	AALF019078_Aedes_albopictus	A0A8D8QJM4|20_537|9.3e-221|Cacopsyll	AALF019078_Aedes_albopictus	GLUD1_Camelus_ferus	AALF019078_Aedes_albopictus	G3W680|1_556|2.4e-250|Theria	GLUD1_Camelus_ferus	G3W680|1_556|7e-249|Theria	LOC102406624_Bubalus_bubalis
A0A1B6EYJ5|1_548|1e-237|Proconiini	ACHR005634_Anopheles_christyi	GLUD1_Canis_lupus_familiaris	AALB008314_Anopheles_albimanus	A0A1B6EYJ5|27_546|2e-220|Proconiini	AALB008314_Anopheles_albimanus	GLUD1_Canis_lupus_familiaris	AALB008314_Anopheles_albimanus	F6U0M9|1_553|2.4e-248|Euteleostomi	GLUD1_Canis_lupus_familiaris	F6U0M9|1_553|1.3e-247|Euteleostomi	LOC102520324_Camelus_ferus
A0A1B0B2Z8|1_547|1.2e-237|Glossina	ACUA003336_Anopheles_culicifacies	GLUD1_Cebus_capucinus_imitator	AATE015803_Anopheles_atroparvus	A0A6P8ZAX9|27_547|1e-219|Arthropoda	AATE015803_Anopheles_atroparvus	GLUD1_Cebus_capucinus_imitator	AATE015803_Anopheles_atroparvus	Q6NZ29|1_544|8.7e-246|Osteoglossocep	GLUD1_Cebus_capucinus_imitator	Q6AZJ0|35_540|2.9e-244|Pipidae	LOC102155014_Canis_lupus_familiaris
A0A6M2DEN7|1_548|1.5e-237|Pulicidae	ADAC009208_Anopheles_darlingi	GLUD1_Chlorocebus_sabaeus	ACHR002660_Anopheles_christyi	A0A480K0L7|20_525|1.5e-219|Sus_scrof	ACHR002660_Anopheles_christyi	GLUD1_Chlorocebus_sabaeus	ACHR002660_Anopheles_christyi	Q6P3L9|1_542|9.9e-245|Bilateria	GLUD1_Chlorocebus_sabaeus	Q6NZ29|11_544|1.2e-243|Osteoglossoce	LOC108294659_Cebus_capucinus_imitator
F5HLM0|1_570|2.1e-237|Cellia	ADIR005422_Anopheles_dirus	GLUD1_Delphinapterus_leucas	ACUA009099_Anopheles_culicifacies	A0A1B6CAL5|22_547|1.6e-219|Clastopte	ACUA009099_Anopheles_culicifacies	GLUD1_Delphinapterus_leucas	ACUA009099_Anopheles_culicifacies	A0A8C5QHB2|34_540|2.4e-244|Leptobrac	GLUD1_Delphinapterus_leucas	Q6P3L9|30_542|7.7e-243|Bilateria	LOC103215856_Chlorocebus_sabaeus
A0A7G3ALB4|1_547|9.4e-237|Phlebotomi	AEPI005939_Anopheles_epiroticus	GLUD1_Echinops_telfairi	ADAC000629_Anopheles_darlingi	A0A8S3WPM8|203_719|2.4e-219|Parnassi	ADAC000629_Anopheles_darlingi	GLUD1_Echinops_telfairi	ADAC000629_Anopheles_darlingi	UPI00188633E4|1_544|2.1e-243|Syngnat	GLUD1_Echinops_telfairi	A0A8C6M4G1|38_547|6.1e-242|Cyprinodo	LOC111167459_Delphinapterus_leucas
V5SKJ2|1_559|1.9e-236|Cecidomyiinae	AFAF015022_Anopheles_farauti	GLUD1_Equus_asinus	ADIR005860_Anopheles_dirus	A0A336MGF4|20_546|2.5e-219|Culicoide	ADIR005860_Anopheles_dirus	GLUD1_Equus_asinus	ADIR005860_Anopheles_dirus	A0A8C6M4G1|36_547|4.5e-243|Cyprinodo	GLUD1_Equus_asinus	UPI00188633E4|34_544|3.2e-241|Syngna	LOC101659860_Echinops_telfairi
Q16SW2|1_552|2.1e-236|Culicidae	AFUN002485_Anopheles_funestus	GLUD1_Equus_caballus	AEPI009997_Anopheles_epiroticus	A0A7G3ALB4|20_545|2.8e-219|Phlebotom	AEPI009997_Anopheles_epiroticus	GLUD1_Equus_caballus	AEPI009997_Anopheles_epiroticus	A0A2U9CEV6|23_539|3.6e-242|Percomorp	GLUD1_Equus_caballus	A0A2U9CEV6|28_539|7.7e-241|Percomorp	LOC106833235_Equus_asinus
A0A336KUC9|141_701|7.5e-236|Culicoid	1274510_Anopheles_gambiae	GLUD1_Equus_przewalskii	AFAF014406_Anopheles_farauti	R4WTN3|22_545|3.3e-219|Riptortus_ped	AFAF014406_Anopheles_farauti	GLUD1_Equus_przewalskii	AFAF014406_Anopheles_farauti	A0A667YM80|4_505|8.1e-242|Teleostei	GLUD1_Equus_przewalskii	A0A667YM80|4_505|9.5e-241|Teleostei	LOC100069935_Equus_caballus
A0A6H5IKT7|1_555|1e-235|Chalcidoidea	AMAM012791_Anopheles_maculatus	GLUD1_Gorilla_gorilla_gorilla	AFUN004525_Anopheles_funestus	Q16SW2|26_550|5.4e-219|Culicidae	AFUN004525_Anopheles_funestus	GLUD1_Gorilla_gorilla_gorilla	AFUN004525_Anopheles_funestus	A0A6P3VXK3|23_543|1.3e-240|Clupea_ha	GLUD1_Gorilla_gorilla_gorilla	UPI0000D91829|1_561|4.1e-240|Didelph	LOC103560057_Equus_przewalskii
A0A8D8QJM4|19_539|3.3e-235|Cacopsyll	AMIN004754_Anopheles_minimus	GLUD1_Homo_sapiens	1275909_Anopheles_gambiae	F6U0M9|42_551|7.7e-219|Euteleostomi	1275909_Anopheles_gambiae	GLUD1_Homo_sapiens	1275909_Anopheles_gambiae	UPI0000D91829|1_561|1.7e-240|Didelph	GLUD1_Homo_sapiens	P82264|3_504|1.1e-239|Percomorphacea	GLUD2_Gorilla_gorilla_gorilla
A0A1B6CAL5|1_549|1.1e-234|Clastopter	ASTE002912_Anopheles_stephensi	GLUD1_Macaca_mulatta	AMAM023018_Anopheles_maculatus	A0A1B0B2Z8|23_545|1.1e-218|Glossina	AMAM023018_Anopheles_maculatus	GLUD1_Macaca_mulatta	AMAM023018_Anopheles_maculatus	A0A6P8VLK4|22_530|1.9e-240|Nototheni	GLUD1_Macaca_mulatta	A0A6P8VLK4|26_530|1.4e-239|Nototheni	GLUD2_Homo_sapiens
R4WTN3|1_547|2.6e-234|Riptortus_pede	Gdh_0_Bactrocera_latifrons	GLUD1_Monodelphis_domestica	AMIN000046_Anopheles_minimus	A0A1Y1JSV4|28_549|1.9e-218|Photinus_	AMIN000046_Anopheles_minimus	GLUD1_Monodelphis_domestica	AMIN000046_Anopheles_minimus	P82264|3_504|2.2e-240|Percomorphacea	GLUD1_Monodelphis_domestica	UPI0003CC1F05|1_559|1.4e-239|Dasypus	LOC693843_Macaca_mulatta
A0A158NNF9|1_556|2.8e-234|Hymenopter	LOC106623867_Bactrocera_oleae	GLUD1_Odobenus_rosmarus_divergens	ASTE002830_Anopheles_stephensi	UPI00083DD4E1|32_556|2.7e-218|Habrop	ASTE002830_Anopheles_stephensi	GLUD1_Odobenus_rosmarus_divergens	ASTE002830_Anopheles_stephensi	A0A8C9T2L0|28_533|2.4e-240|Scleropag	GLUD1_Odobenus_rosmarus_divergens	A0A8C9T2L0|28_533|1.6e-239|Scleropag	LOC697678_Macaca_mulatta
A0A336MGF4|1_548|3e-234|Culicoides_s	LOC101460941_Ceratitis_capitata	GLUD1_Orycteropus_afer	LOC108970020_Bactrocera_latifrons	A0A8S1DJK7|18_542|2.8e-218|Cloeon_di	LOC108970020_Bactrocera_latifrons	GLUD1_Orycteropus_afer	LOC108970020_Bactrocera_latifrons	A0A8C2WLK4|130_638|2.9e-240|Clupeoce	GLUD1_Orycteropus_afer	A0A8C2WLK4|131_638|1.8e-239|Clupeoce	LOC103101311_Monodelphis_domestica
U5EZ79|1_548|9.6e-234|Corethrella_ap	6047848_Culex_quinquefasciatus	GLUD1_Otolemur_garnettii	LOC106625530_Bactrocera_oleae	A0A8R1W312|14_535|3.2e-218|Aphidomor	LOC106625530_Bactrocera_oleae	GLUD1_Otolemur_garnettii	LOC106625530_Bactrocera_oleae	UPI0003CC1F05|1_559|1.1e-239|Dasypus	GLUD1_Otolemur_garnettii	A0A6P3VXK3|29_543|8e-239|Clupea_hare	LOC101378537_Odobenus_rosmarus_divergen
A0A1B6CCS9|1_546|1.1e-233|Clastopter	Dana_GF17976_Drosophila_ananassae	GLUD1_Pan_paniscus	LOC101459951_Ceratitis_capitata	UPI001C9C398C|30_555|6.3e-218|Ventur	LOC101459951_Ceratitis_capitata	GLUD1_Pan_paniscus	LOC101459951_Ceratitis_capitata	A0A8C6TF48|21_546|1.1e-239|Neogobius	GLUD1_Pan_paniscus	A0A8C6TF48|38_546|3.3e-238|Neogobius	LOC103194559_Orycteropus_afer
A0A8S3WPM8|187_721|1.7e-233|Parnassi	LOC108026239_Drosophila_biarmipes	GLUD1_Pan_troglodytes	6040898_Culex_quinquefasciatus	Q6P3L9|34_540|8.4e-218|Bilateria	6040898_Culex_quinquefasciatus	GLUD1_Pan_troglodytes	6040898_Culex_quinquefasciatus	A0A3Q2DRA7|31_539|2.1e-238|Cyprinodo	GLUD1_Pan_troglodytes	A0A6H5IKT7|8_555|1e-237|Chalcidoidea	LOC100947600_Otolemur_garnettii
A0A8I6RK91|1_550|2.7e-233|Cimex_lect	LOC108129618_Drosophila_bipectinata MYHLKSLARQGALRQQELTTLAKALPTAVMHS--- 35	GLUD1_Physeter_catodon	Dana_GF18014_Drosophila_ananassae	A0A158NNF9|35_554|9.2e-218|Hymenopte	Dana_GF18014_Drosophila_ananassae	GLUD1_Physeter_catodon	Dana_GF18014_Drosophila_ananassae	Q8JG17|19_539|2.7e-238|Euteleosteomo	GLUD1_Physeter_catodon	A0A3Q2DRA7|32_539|1.6e-237|Cyprinodo	GLUD2_Pan_paniscus
A0A0K8SKG2|1_545|3.6e-233|Miridae	LOC108602627_Drosophila_busckii	GLUD1_Pongo_abelii	LOC108024411_Drosophila_biarmipes	A0A0K8SKG2|31_543|1.1e-217|Miridae	LOC108024411_Drosophila_biarmipes	GLUD1_Pongo_abelii	LOC108024411_Drosophila_biarmipes	A0A3Q2ZZV9|1_545|4.9e-238|Rivulidae	GLUD1_Pongo_abelii	A0A1B6EYJ5|16_548|3.5e-237|Proconiin	GLUD2_Pan_troglodytes
A0A8R1W312|18_537|2.4e-232|Aphidomor	LOC108136871_Drosophila_elegans	GLUD1_Saimiri_boliviensis_boliviensis	LOC108129616_Drosophila_bipectinata	A0A672N445|36_537|1.3e-217|Cyprinoid	LOC108129616_Drosophila_bipectinata	GLUD1_Saimiri_boliviensis_boliviensis	LOC108129616_Drosophila_bipectinata	A0A2K5QQ50|1_558|7.2e-238|Cebus_imit	GLUD1_Saimiri_boliviensis_boliviensis	A0A6M2DEN7|7_548|4.5e-237|Pulicidae	LOC102978941_Physeter_catodon
UPI001C9C398C|1_556|8.4e-231|Venturi	Dere_GG12388_Drosophila_erecta	109430715_Aedes_albopictus	LOC108604582_Drosophila_busckii	G3W680|57_554|1.6e-217|Theria	LOC108604582_Drosophila_busckii	109430715_Aedes_albopictus	LOC108604582_Drosophila_busckii	UPI00165AF030|27_541|1.6e-237|Fundul		A0A2K5QQ50|1_558|4.6e-237|Cebus_imit	LOC102984473_Physeter_catodon
UPI001ED8888D|15_553|1.1e-230|Ischnu	LOC108116678_Drosophila_eugracilis	AALB008454_Anopheles_albimanus	LOC108148676_Drosophila_elegans	A0A8C5QHB2|34_538|1.9e-217|Leptobrac	LOC108148676_Drosophila_elegans	AALB008454_Anopheles_albimanus	LOC108148676_Drosophila_elegans	A0A6H5IKT7|7_555|1.7e-237|Chalcidoid		A0A8D8QJM4|20_539|8.6e-237|Cacopsyll	GLUD2_Pongo_abelii
A0A0C9Q076|19_546|2.5e-230|Apocrita	Dgri_GH19680_Drosophila_grimshawi	AATE006544_Anopheles_atroparvus	Dere_GG12444_Drosophila_erecta	A0A8J2S0U6|372_893|2.1e-217|Daphnia_	Dere_GG12444_Drosophila_erecta	AATE006544_Anopheles_atroparvus	Dere_GG12444_Drosophila_erecta	A0A151MTA8|1_490|5.4e-237|Crocodylia		A0A151MTA8|1_490|8.6e-237|Crocodylia	LOC101033096_Saimiri_boliviensis_bolivi
A0A8S1DJK7|20_544|2.9e-230|Cloeon_di	LOC111598274_Drosophila_hydei	ACHR005634_Anopheles_christyi	LOC108108836_Drosophila_eugracilis	A0A8I6RK91|38_548|2.2e-217|Cimex_lec	LOC108108836_Drosophila_eugracilis	ACHR005634_Anopheles_christyi	LOC108108836_Drosophila_eugracilis	UPI00140314FE|53_561|9.8e-237|Petrom		Q8JG17|35_539|9.2e-237|Euteleosteomo
A0A1Y1JSV4|1_551|5.8e-230|Photinus_p	Gdh_Drosophila_melanogaster	ACUA003336_Anopheles_culicifacies	LOC108091637_Drosophila_ficusphila	A0A1J1IWE9|23_557|3.2e-217|Clunio_ma	LOC108091637_Drosophila_ficusphila	ACUA003336_Anopheles_culicifacies	LOC108091637_Drosophila_ficusphila	A0A1B6EYJ5|19_548|1.1e-236|Proconiin		A0A6P8ZAX9|21_549|1.1e-236|Arthropod
UPI001CF75BF2|16_544|6.9e-230|Tribol	Dmoj_GI22276_Drosophila_mojavensis	ADAC009208_Anopheles_darlingi	Dgri_GH20746_Drosophila_grimshawi	A0A1B6CCS9|29_544|3.5e-217|Clastopte	Dgri_GH20746_Drosophila_grimshawi	ADAC009208_Anopheles_darlingi	Dgri_GH20746_Drosophila_grimshawi	UPI00112CD02E|37_540|1.4e-236|Rhinat		A0A3Q2ZZV9|38_545|1.4e-236|Rivulidae
A0A7J7AG94|1_552|7.1e-230|Abscondita	LOC111069386_Drosophila_obscura	ADIR005422_Anopheles_dirus	LOC111596602_Drosophila_hydei	A0A7J7AG94|29_550|3.6e-217|Abscondit	LOC111596602_Drosophila_hydei	ADIR005422_Anopheles_dirus	LOC111596602_Drosophila_hydei	A0A8C4NGB6|17_535|2.1e-236|Eptatretu		UPI00165AF030|32_541|1.7e-236|Fundul
UPI00083DD4E1|1_558|1.2e-228|Habropo	FBpp0282018_Drosophila_pseudoobscura MYHLKSLARQGAMRQQELTTLVKALPTAALQA--- 35	AEPI005939_Anopheles_epiroticus	LOC111596601_Drosophila_hydei	UPI001CF75BF2|23_542|4.2e-217|Tribol	LOC111596601_Drosophila_hydei	AEPI005939_Anopheles_epiroticus	LOC111596601_Drosophila_hydei	A0A8D8QJM4|21_539|2.2e-236|Cacopsyll		UPI00140314FE|47_561|2.4e-236|Petrom
A0A3R7PGP1|212_745|2.7e-228|Penaeus_	LOC108044139_Drosophila_rhopaloa	AFAF015022_Anopheles_farauti	bb8_Drosophila_melanogaster	A0A0C9Q076|27_544|4.4e-217|Apocrita	bb8_Drosophila_melanogaster	AFAF015022_Anopheles_farauti	bb8_Drosophila_melanogaster	A0A6M2DEN7|11_548|2.7e-236|Pulicidae		A0A1B0B2Z8|8_547|3.1e-236|Glossina
UPI00096B5D9F|1_549|4.3e-228|Aethina	LOC110188486_Drosophila_serrata	AFUN002485_Anopheles_funestus	Dmoj_GI23213_Drosophila_mojavensis	F5HLM0|21_568|6.3e-217|Cellia	Dmoj_GI23213_Drosophila_mojavensis	AFUN002485_Anopheles_funestus	Dmoj_GI23213_Drosophila_mojavensis	A0A6P8ZAX9|20_549|2.9e-236|Arthropod		Q16SW2|8_552|4.8e-236|Culicidae
A0A8J2S0U6|357_894|5.2e-228|Daphnia_	LOC108056279_Drosophila_takahashii	1274510_Anopheles_gambiae	Dmoj_GI23212_Drosophila_mojavensis	UPI001ED8888D|32_551|6.8e-217|Ischnu	Dmoj_GI23212_Drosophila_mojavensis	1274510_Anopheles_gambiae	Dmoj_GI23212_Drosophila_mojavensis	A0A3R7PGP1|201_746|3.1e-236|Penaeus_		A0A8C4NGB6|19_535|5.6e-236|Eptatretu
A0A1W4W2V6|1_554|9.4e-228|Agrilus_pl	Dvir_GJ24069_Drosophila_virilis	AMAM012791_Anopheles_maculatus	LOC111073979_Drosophila_obscura	A0A3R7PGP1|225_744|8.1e-217|Penaeus_	LOC111073979_Drosophila_obscura	AMAM012791_Anopheles_maculatus	LOC111073979_Drosophila_obscura	Q16SW2|7_552|3.8e-236|Culicidae		UPI00112CD02E|38_540|7e-236|Rhinatre
UPI000C6F971D|29_585|2.1e-227|Copido	Dwil_GK11603_Drosophila_willistoni	AMIN004754_Anopheles_minimus	LOC111072941_Drosophila_obscura	A0A6P8VLK4|27_529|1.1e-216|Nototheni	LOC111072941_Drosophila_obscura	AMIN004754_Anopheles_minimus	LOC111072941_Drosophila_obscura	UPI000DC6C9BC|1_498|8.8e-236|Canis_l		A0A7G3ALB4|15_547|9.7e-236|Phlebotom
A0A0B4M128|28_552|2.9e-227|Pleocyema	Dyak_GE10843_Drosophila_yakuba	ASTE002912_Anopheles_stephensi	FBpp0275247_Drosophila_pseudoobscura	A0A8C6M4G1|35_545|1.2e-216|Cyprinodo	FBpp0275247_Drosophila_pseudoobscura	ASTE002912_Anopheles_stephensi	FBpp0275247_Drosophila_pseudoobscura	A0A8C4A0A9|7_501|9e-236|Clupeiformes		A0A3R7PGP1|207_746|1e-235|Penaeus_va
A0A7R8WXJ4|3_552|1.7e-226|Darwinula_	GAUT033943_Glossina_austeni	Gdh_0_Bactrocera_latifrons	FBpp0283646_Drosophila_pseudoobscura	A0A0B4M128|33_551|1.6e-216|Pleocyema	FBpp0283646_Drosophila_pseudoobscura	Gdh_0_Bactrocera_latifrons	FBpp0283646_Drosophila_pseudoobscura	A0A1B0B2Z8|8_547|1e-235|Glossina		UPI000DC6C9BC|1_498|1.2e-235|Canis_l
UPI001E279CA8|1_554|1.9e-226|Coccine	GAUT042129_Glossina_austeni	LOC106623867_Bactrocera_oleae	LOC108051547_Drosophila_rhopaloa	A0A667YM80|4_503|2e-216|Teleostei	LOC108051547_Drosophila_rhopaloa	LOC106623867_Bactrocera_oleae	LOC108051547_Drosophila_rhopaloa	A0A7G3ALB4|13_547|2.4e-235|Phlebotom		A0A8C4A0A9|7_501|1.6e-235|Clupeiform
A0A171A2I5|2_499|2e-226|Panheteropte	GBRI007185_Glossina_brevipalpis	LOC101460941_Ceratitis_capitata	LOC110191013_Drosophila_serrata	U5EZ79|33_546|3.5e-216|Corethrella_a	LOC110191013_Drosophila_serrata	LOC101460941_Ceratitis_capitata	LOC110191013_Drosophila_serrata	A0A087Y4J2|25_541|5.5e-235|Cyprinodo		R4WTN3|22_547|7.4e-235|Riptortus_ped
UPI00083C8FEB|1_552|3.5e-226|Nicroph	GMOY007353_Glossina_morsitans	6047848_Culex_quinquefasciatus	LOC108069796_Drosophila_takahashii	UPI00188633E4|41_542|4.9e-216|Syngna	LOC108069796_Drosophila_takahashii	6047848_Culex_quinquefasciatus	LOC108069796_Drosophila_takahashii	A0A8S3WPM8|187_721|2.4e-234|Parnassi		A0A2M4CUS3|9_547|1.1e-234|Endopteryg
A0A1B6EWB4|2_544|8.5e-226|Proconiini	GPPI017174_Glossina_palpalis	Dana_GF17976_Drosophila_ananassae	Dvir_GJ22871_Drosophila_virilis	A0A2U9CEV6|35_537|5.8e-216|Percomorp	Dvir_GJ22871_Drosophila_virilis	Dana_GF17976_Drosophila_ananassae	Dvir_GJ22871_Drosophila_virilis	A0A8R1W312|15_537|2.6e-234|Aphidomor		A0A8S3WPM8|201_721|1.3e-234|Parnassi
A0A4D5R9S3|15_553|2.2e-225|Scolopend	LOC111681537_Lucilia_cuprina	LOC108026239_Drosophila_biarmipes	Dvir_GJ22872_Drosophila_virilis	V5SKJ2|18_557|6.6e-216|Cecidomyiinae	Dvir_GJ22872_Drosophila_virilis	LOC108026239_Drosophila_biarmipes	Dvir_GJ22872_Drosophila_virilis	A0A2D4M7S2|1_489|2.8e-234|Sauria		A0A8R1W312|16_537|1.6e-234|Aphidomor
A0A7J7B657|1_552|9.8e-225|Lamprigera	101888084_Musca_domestica	LOC108129618_Drosophila_bipectinata	Dwil_GK11580_Drosophila_willistoni	A0A4D5R9S3|34_552|7.2e-216|Scolopend	Dwil_GK11580_Drosophila_willistoni	LOC108129618_Drosophila_bipectinata	Dwil_GK11580_Drosophila_willistoni	A0A0B4M128|29_553|2.8e-234|Pleocyema		A0A158NNF9|9_556|3e-234|Hymenoptera
F6U0M9|41_552|1e-224|Euteleostomi	LOC108363005_Rhagoletis_zephyria	LOC108602627_Drosophila_busckii	Dyak_GE23967_Drosophila_yakuba	UPI00096B5D9F|27_547|1e-215|Aethina_	Dyak_GE23967_Drosophila_yakuba	LOC108602627_Drosophila_busckii	Dyak_GE23967_Drosophila_yakuba	R4WTN3|20_547|3.1e-234|Riptortus_ped		A0A2D4M7S2|1_489|4.2e-234|Sauria
A0A7R9RRB3|47_573|1.4e-224|Argulus_f	106091372_Stomoxys_calcitrans	LOC108136871_Drosophila_elegans	LOC105273074_Fopius_arisanus	A0A6J2XP33|27_545|1.3e-215|Sitophilu	LOC105273074_Fopius_arisanus	LOC108136871_Drosophila_elegans	LOC105273074_Fopius_arisanus	UPI0018A0F58D|1_548|9.2e-234|Choloep		A0A336MGF4|7_548|5.7e-234|Culicoides
A0A8B8PSH7|10_550|1.7e-224|Rhodamnia	Gdh_2_Zeugodacus_cucurbitae	Dere_GG12388_Drosophila_erecta	GBRI041814_Glossina_brevipalpis	A0A8C2WLK4|135_636|1.6e-215|Clupeoce	GBRI041814_Glossina_brevipalpis	Dere_GG12388_Drosophila_erecta	GBRI041814_Glossina_brevipalpis	A0A2M4CUS3|8_547|1.1e-233|Endopteryg		UPI00063C45B1|152_713|8e-234|Odobenu
Q6AZJ0|35_539|1.1e-223|Pipidae		LOC108116678_Drosophila_eugracilis	GMOY007550_Glossina_morsitans	P82264|4_502|3.7e-215|Percomorphacea	GMOY007550_Glossina_morsitans	LOC108116678_Drosophila_eugracilis	GMOY007550_Glossina_morsitans	A0A158NNF9|9_556|1.1e-233|Hymenopter		A0A1S3FC21|1_558|1e-233|Heteromyidae
UPI001C90C2EC|87_607|3.3e-223|Thorac		Dgri_GH19680_Drosophila_grimshawi	GMOY008640_Glossina_morsitans	A0A1W4W2V6|29_552|5.5e-215|Agrilus_p	GMOY008640_Glossina_morsitans	Dgri_GH19680_Drosophila_grimshawi	GMOY008640_Glossina_morsitans	UPI00063C45B1|152_713|1.4e-233|Odobe		A0A087Y4J2|34_541|1.1e-233|Cyprinodo
A0A672N445|31_538|3.9e-223|Cyprinoid		LOC111598274_Drosophila_hydei	GPPI009868_Glossina_palpalis	P54385|28_560|5.6e-215|Brachycera	GPPI009868_Glossina_palpalis	LOC111598274_Drosophila_hydei	GPPI009868_Glossina_palpalis	A0A336MGF4|6_548|1.7e-233|Culicoides		A0A0B4M128|29_553|1.4e-233|Pleocyema
T1IXS4|30_555|4.2e-223|Strigamia_mar		Gdh_Drosophila_melanogaster	LOC111690779_Lucilia_cuprina	A0A8C9T2L0|30_531|8.6e-215|Scleropag	LOC111690779_Lucilia_cuprina	Gdh_Drosophila_melanogaster	LOC111690779_Lucilia_cuprina	UPI001403E8FC|36_537|1.8e-233|Petrom		A0A8J2S0U6|356_895|2.3e-233|Daphnia_
UPI001D0896EF|1_546|5e-223|Chrysoper		Dmoj_GI22276_Drosophila_mojavensis	101893797_Musca_domestica	A0A674BEK7|4_501|1e-214|Salmoninae	101893797_Musca_domestica	Dmoj_GI22276_Drosophila_mojavensis	101893797_Musca_domestica	A0A1B6CAL5|18_549|3e-233|Clastoptera		A0A1B6CAL5|20_549|2.7e-233|Clastopte
A0A6J2XP33|5_547|7.5e-223|Sitophilus		LOC111069386_Drosophila_obscura	LOC108365997_Rhagoletis_zephyria	A0A336KUC9|166_699|1.2e-214|Culicoid	LOC108365997_Rhagoletis_zephyria	LOC111069386_Drosophila_obscura	LOC108365997_Rhagoletis_zephyria	A0A8J2S0U6|356_895|3.9e-233|Daphnia_		A0A8I6RK91|37_550|2.8e-233|Cimex_lec
A0A1I9WLI4|1_517|1.1e-222|cellular_o		FBpp0282018_Drosophila_pseudoobscura	106082796_Stomoxys_calcitrans	A0A8B8PSH7|29_549|1.7e-214|Rhodamnia	106082796_Stomoxys_calcitrans	FBpp0282018_Drosophila_pseudoobscura	106082796_Stomoxys_calcitrans	A0A1S3FC21|1_558|9.4e-233|Heteromyid		UPI0018A0F58D|1_548|8.6e-233|Choloep
G3W680|57_554|1.7e-222|Theria		LOC108044139_Drosophila_rhopaloa	LOC105219584_Zeugodacus_cucurbitae	UPI001E279CA8|23_552|2e-214|Coccinel	LOC105219584_Zeugodacus_cucurbitae	LOC108044139_Drosophila_rhopaloa	LOC105219584_Zeugodacus_cucurbitae	A0A8I6RK91|38_550|1.4e-232|Cimex_lec		A0A0K8SKG2|31_545|9.9e-233|Miridae
Q6P3L9|35_541|2.4e-222|Bilateria		LOC110188486_Drosophila_serrata	109430715_Aedes_albopictus	A0A7R8WXJ4|32_551|2.5e-214|Darwinula		LOC110188486_Drosophila_serrata	109430715_Aedes_albopictus	UPI001C9C398C|29_557|1.7e-232|Ventur		UPI001403E8FC|33_537|1.1e-232|Petrom
A0A226DZK2|10_543|3.9e-222|Folsomia_		LOC108056279_Drosophila_takahashii	AALB008454_Anopheles_albimanus	A0A8C6TF48|41_544|3.6e-214|Neogobius		LOC108056279_Drosophila_takahashii	AALB008454_Anopheles_albimanus	A0A0K8SKG2|32_545|1.7e-232|Miridae		A0A0C9Q076|21_546|1.2e-232|Apocrita
A0A6P6YB49|32_565|7.4e-222|Dermatoph		Dvir_GJ24069_Drosophila_virilis	AATE006544_Anopheles_atroparvus	A0A171A2I5|2_497|4.6e-214|Panheterop		Dvir_GJ24069_Drosophila_virilis	AATE006544_Anopheles_atroparvus	A0A866W1Y1|12_499|1.8e-232|Euteleost		UPI001C9C398C|31_557|1.6e-232|Ventur
UPI0006B08ED3|28_567|7.9e-222|Limulu		Dwil_GK11603_Drosophila_willistoni	ACHR005634_Anopheles_christyi	T1IXS4|37_554|5e-214|Strigamia_marit		Dwil_GK11603_Drosophila_willistoni	ACHR005634_Anopheles_christyi	A0A0C9Q076|23_546|3e-232|Apocrita		A0A8S1DJK7|12_544|1.6e-232|Cloeon_di
V5GVB8|11_548|1.3e-221|Anoplophora_g		Dyak_GE10843_Drosophila_yakuba	ACUA003336_Anopheles_culicifacies	A0A6P3VXK3|43_541|5.1e-214|Clupea_ha		Dyak_GE10843_Drosophila_yakuba	ACUA003336_Anopheles_culicifacies	A0A3Q2YBU9|1_490|3.8e-232|Syngnathid		U5EZ79|11_548|2.8e-232|Corethrella_a
A0A8C6M4G1|39_546|1.6e-221|Cyprinodo		GAUT033943_Glossina_austeni	ADAC009208_Anopheles_darlingi	A0A1B6EWB4|26_543|5.6e-214|Proconiin		GAUT033943_Glossina_austeni	ADAC009208_Anopheles_darlingi	A0A4D5R9S3|27_554|4.5e-232|Scolopend		A0A1B6CCS9|30_546|4.5e-232|Clastopte
A0A2U9CEV6|35_538|2.4e-221|Percomorp		GAUT042129_Glossina_austeni	ADIR005422_Anopheles_dirus	UPI000C77DF09|29_553|1.5e-213|Euryte		GAUT042129_Glossina_austeni	ADIR005422_Anopheles_dirus	K7FG37|1_490|5.2e-232|Archelosauria		A0A4D5R9S3|28_554|4.9e-232|Scolopend
A0A667YM80|4_504|3e-221|Teleostei		GBRI007185_Glossina_brevipalpis	AEPI005939_Anopheles_epiroticus	A0A8C4NGB6|25_533|1.5e-213|Eptatretu		GBRI007185_Glossina_brevipalpis	AEPI005939_Anopheles_epiroticus	UPI0010547A55|29_533|7e-232|Gouania_		K7FG37|1_490|7.7e-232|Archelosauria
A0A6P7G9B3|1_553|5e-221|Chrysomelida		GMOY007353_Glossina_morsitans	AFAF015022_Anopheles_farauti	A0A7R9RRB3|55_572|1.6e-213|Argulus_f		GMOY007353_Glossina_morsitans	AFAF015022_Anopheles_farauti	A0A8S1DJK7|15_544|8.3e-232|Cloeon_di		A0A7R8WXJ4|36_553|1e-231|Darwinula_s
H0WN67|57_561|6.9e-221|Otolemur_garn		GPPI017174_Glossina_palpalis	AFUN002485_Anopheles_funestus	Q8JG17|32_537|1.8e-213|Euteleosteomo		GPPI017174_Glossina_palpalis	AFUN002485_Anopheles_funestus	A0A7R8WXJ4|37_553|1e-231|Darwinula_s		A0A3Q2YBU9|1_490|1.1e-231|Syngnathid
A0A067R7C3|1_528|8.9e-221|Polyneopte		LOC111681537_Lucilia_cuprina	1274510_Anopheles_gambiae	A0A3Q2DRA7|36_536|2e-213|Cyprinodon		LOC111681537_Lucilia_cuprina	1274510_Anopheles_gambiae	A0A1B6CCS9|30_546|1.2e-231|Clastopte		UPI001ED8888D|33_553|1.2e-231|Ischnu
A0A0K2TX10|34_551|1.1e-220|Lepeophth		101888084_Musca_domestica	AMAM012791_Anopheles_maculatus	UPI000C6F971D|51_583|2.3e-213|Copido		101888084_Musca_domestica	AMAM012791_Anopheles_maculatus	UPI001ED8888D|34_553|2.8e-231|Ischnu		UPI0010547A55|28_533|1.5e-231|Gouani
UPI000C6EB44B|20_547|1.1e-220|Centru		101888084_Musca_domestica_0	AMIN004754_Anopheles_minimus	A0A7M7HLY8|42_542|2.6e-213|Echinacea		101888084_Musca_domestica_0	AMIN004754_Anopheles_minimus	F6YHB4|1_519|3.1e-231|Theria		A0A866W1Y1|15_499|2.3e-231|Euteleost
UPI00188633E4|41_543|1.5e-220|Syngna		LOC108363005_Rhagoletis_zephyria	ASTE002912_Anopheles_stephensi	UPI0000D91829|59_559|4.3e-213|Didelp		LOC108363005_Rhagoletis_zephyria	ASTE002912_Anopheles_stephensi	UPI001455B5BB|24_536|3.9e-231|Asteri		UPI001455B5BB|23_536|3.8e-231|Asteri
A0A553NSB1|62_588|1.7e-220|Tigriopus		106091372_Stomoxys_calcitrans	Gdh_0_Bactrocera_latifrons	UPI00112CD02E|37_539|4.5e-213|Rhinat		106091372_Stomoxys_calcitrans	Gdh_0_Bactrocera_latifrons	U5EZ79|13_548|4.3e-231|Corethrella_a		A0A139WAV2|566_1091|3.9e-231|Triboli
A0A6P8VLK4|28_529|2e-220|Notothenioi		Gdh_2_Zeugodacus_cucurbitae	LOC106623867_Bactrocera_oleae	UPI00140314FE|59_559|4.9e-213|Petrom		Gdh_2_Zeugodacus_cucurbitae	LOC106623867_Bactrocera_oleae	A0A8B8PSH7|17_551|5.7e-231|Rhodamnia		P54385|15_562|4.7e-231|Brachycera
UPI000C77DF09|29_554|3.1e-220|Euryte		LOC105728184_Aotus_nancymaae	LOC101460941_Ceratitis_capitata	UPI00165AF030|38_538|9.8e-213|Fundul		LOC105728184_Aotus_nancymaae	LOC101460941_Ceratitis_capitata	A0A139WAV2|569_1091|8.8e-231|Triboli		A0A1J1IWE9|19_559|9.5e-231|Clunio_ma
P82264|4_503|1.2e-219|Percomorphacea		LOC105709651_Aotus_nancymaae	6047848_Culex_quinquefasciatus	UPI001C90C2EC|87_606|1.9e-212|Thorac		LOC105709651_Aotus_nancymaae	6047848_Culex_quinquefasciatus	A0A7R9RRB3|54_573|1.1e-230|Argulus_f		A0A8B8PSH7|16_551|1.5e-230|Rhodamnia
A0A8C2WLK4|135_637|1.7e-219|Clupeoce		LOC102406624_Bubalus_bubalis	Dana_GF17976_Drosophila_ananassae	UPI001455B5BB|23_534|1.9e-212|Asteri		LOC102406624_Bubalus_bubalis	Dana_GF17976_Drosophila_ananassae	P54385|12_562|1.8e-230|Brachycera		A0A7R9RRB3|54_573|1.6e-230|Argulus_f
A0A8C9T2L0|31_532|2.4e-219|Scleropag		LOC102520324_Camelus_ferus	LOC108026239_Drosophila_biarmipes	A0A8C4A0A9|7_499|2.1e-212|Clupeiform		LOC102520324_Camelus_ferus	LOC108026239_Drosophila_biarmipes	A0A8C4SGG6|27_536|2.2e-230|Euteleost		A0A1W4W2V6|16_554|2.1e-230|Agrilus_p
A0A7R9PXP8|25_554|2.5e-219|Medioppia		LOC102155014_Canis_lupus_familiaris	LOC108129618_Drosophila_bipectinata	UPI001D0896EF|28_544|2.3e-212|Chryso		LOC102155014_Canis_lupus_familiaris	LOC108129618_Drosophila_bipectinata	A0A1J1IWE9|23_559|2.3e-230|Clunio_ma		F5HLM0|8_570|3.3e-230|Cellia
A0A8C6TF48|40_545|3.1e-219|Neogobius		LOC108294659_Cebus_capucinus_imitator	LOC108602627_Drosophila_busckii	V5GVB8|26_546|2.6e-212|Anoplophora_g		LOC108294659_Cebus_capucinus_imitator	LOC108602627_Drosophila_busckii	A0A7M7HLY8|39_543|2.4e-230|Echinacea		A0A7M7HLY8|42_543|4.1e-230|Echinacea
A0A674BEK7|3_502|5.5e-219|Salmoninae		LOC103215856_Chlorocebus_sabaeus	LOC108136871_Drosophila_elegans	A0A6P6YB49|36_564|2.6e-212|Dermatoph		LOC103215856_Chlorocebus_sabaeus	LOC108136871_Drosophila_elegans	A0A1W4W2V6|16_554|4.9e-230|Agrilus_p		UPI00096B5D9F|21_549|5.2e-230|Aethin
A0A289YHG5|26_547|7.8e-219|Eulimnoga		LOC111167459_Delphinapterus_leucas	Dere_GG12388_Drosophila_erecta	A0A553NSB1|69_588|2.8e-212|Tigriopus		LOC111167459_Delphinapterus_leucas	Dere_GG12388_Drosophila_erecta	A0A8B7Y6T4|30_539|6.1e-230|Valvatida		A0A8B7Y6T4|26_539|5.7e-230|Valvatida
A0A6P3VXK3|44_542|1.3e-218|Clupea_ha		LOC101659860_Echinops_telfairi	LOC108116678_Drosophila_eugracilis	A0A7J7B657|28_550|2.9e-212|Lampriger		LOC101659860_Echinops_telfairi	LOC108116678_Drosophila_eugracilis	UPI00096B5D9F|24_549|7.3e-230|Aethin		A0A6P6YB49|30_566|6.7e-230|Dermatoph
A0A8J2LQH2|23_541|2.8e-218|Allacma_f		LOC106833235_Equus_asinus	Dgri_GH19680_Drosophila_grimshawi	A0A3Q2ZZV9|43_542|3.5e-212|Rivulidae		LOC106833235_Equus_asinus	Dgri_GH19680_Drosophila_grimshawi	A0A6P6YB49|33_566|8.5e-230|Dermatoph		F6YHB4|1_519|6.7e-230|Theria
A0A8C4NGB6|22_534|2.9e-218|Eptatretu		LOC100069935_Equus_caballus	LOC111598274_Drosophila_hydei	A0A226DZK2|14_541|6.7e-212|Folsomia_		LOC100069935_Equus_caballus	LOC111598274_Drosophila_hydei	A0A1Y1JSV4|20_551|1.5e-229|Photinus_		A0A171A2I5|2_499|7.6e-230|Panheterop
A0A3Q2DRA7|36_538|3e-218|Cyprinodon		LOC103560057_Equus_przewalskii	Gdh_Drosophila_melanogaster	A0A0K2TX10|38_550|7.2e-212|Lepeophth		LOC103560057_Equus_przewalskii	Gdh_Drosophila_melanogaster	V5SKJ2|10_559|1.9e-229|Cecidomyiinae		A0A1Y1JSV4|19_551|7.8e-230|Photinus_
UPI001455B5BB|27_535|4.5e-218|Asteri		GLUD2_Gorilla_gorilla_gorilla	Dmoj_GI22276_Drosophila_mojavensis	UPI00083C8FEB|28_550|1.5e-211|Nicrop		GLUD2_Gorilla_gorilla_gorilla	Dmoj_GI22276_Drosophila_mojavensis	T1IXS4|41_556|2.1e-229|Strigamia_mar		V5SKJ2|10_559|9e-230|Cecidomyiinae
UPI0000D91829|60_560|4.7e-218|Didelp		GLUD2_Homo_sapiens	LOC111069386_Drosophila_obscura	A0A1D1VP89|64_572|2e-211|Ramazzottiu		GLUD2_Homo_sapiens	LOC111069386_Drosophila_obscura	P00368|3_503|3.2e-229|Sauria		A0A8C4SGG6|33_536|1.8e-229|Euteleost
A0A1V9Y381|16_538|4.8e-218|Gamasina		LOC693843_Macaca_mulatta	FBpp0282018_Drosophila_pseudoobscura	A0A289YHG5|26_546|3.7e-211|Eulimnoga		LOC693843_Macaca_mulatta	FBpp0282018_Drosophila_pseudoobscura	A0A6F8ZMW3|1_528|3.3e-229|Actinopter		T1IXS4|40_556|1.8e-229|Strigamia_mar
T1JVD9|26_545|5.4e-218|Tetranychidae		LOC697678_Macaca_mulatta	LOC108044139_Drosophila_rhopaloa	A0A814IQ64|34_542|6.9e-211|Brachionu		LOC697678_Macaca_mulatta	LOC108044139_Drosophila_rhopaloa	A0A171A2I5|2_499|3.5e-229|Panheterop		P00368|3_503|3.8e-229|Sauria
UPI00112CD02E|37_540|8e-218|Rhinatre		LOC103101311_Monodelphis_domestica	LOC110188486_Drosophila_serrata	A0A7R9PXP8|32_554|7.2e-211|Medioppia		LOC103101311_Monodelphis_domestica	LOC110188486_Drosophila_serrata	F5HLM0|10_570|4.2e-229|Cellia		A0A7J7AG94|28_552|5.2e-229|Abscondit
UPI00140314FE|58_561|8.2e-218|Petrom		LOC101378537_Odobenus_rosmarus_divergen	LOC108056279_Drosophila_takahashii	A0A151MTA8|1_488|7.8e-211|Crocodylia		LOC101378537_Odobenus_rosmarus_divergen	LOC108056279_Drosophila_takahashii	UPI0018F2FB61|1_547|5e-229|Scyliorhi		UPI00083DD4E1|19_558|5.9e-229|Habrop
UPI0006B1019B|41_566|1.4e-217|Limulu		LOC103194559_Orycteropus_afer	Dvir_GJ24069_Drosophila_virilis	UPI0006B08ED3|43_566|9.5e-211|Limulu		LOC103194559_Orycteropus_afer	Dvir_GJ24069_Drosophila_virilis	A0A7J7AG94|28_552|8.7e-229|Abscondit		UPI000C6F971D|37_585|9.7e-229|Copido
A0A1D1VP89|61_572|1.5e-217|Ramazzott		LOC100947600_Otolemur_garnettii	Dwil_GK11603_Drosophila_willistoni	A0A6P7G9B3|31_551|1e-210|Chrysomelid		LOC100947600_Otolemur_garnettii	Dwil_GK11603_Drosophila_willistoni	UPI00083DD4E1|11_558|1.7e-228|Habrop		A0A1B6EWB4|27_544|1.5e-228|Proconiin
A0A1W0WTA7|58_566|1.5e-217|Hypsibius		GLUD2_Pan_paniscus	Dyak_GE10843_Drosophila_yakuba	A0A8B7Y6T4|27_537|1.1e-210|Valvatida		GLUD2_Pan_paniscus	Dyak_GE10843_Drosophila_yakuba	A0A1B6EWB4|27_544|2.1e-228|Proconiin		A0A336KUC9|148_701|2.3e-228|Culicoid
A0A7R9LP50|30_557|1.7e-217|Oppiella_		GLUD2_Pan_troglodytes	GAUT033943_Glossina_austeni	A0A817NFH0|8_535|1.3e-210|Rotaria		GLUD2_Pan_troglodytes	GAUT033943_Glossina_austeni	UPI000C6F971D|38_585|2.4e-228|Copido		UPI001C90C2EC|86_608|4.6e-228|Thorac
A0A7M7HLY8|45_543|1.9e-217|Echinacea		LOC102978941_Physeter_catodon	GAUT042129_Glossina_austeni	UPI00065BDDF2|28_530|1.7e-210|Aplysi		LOC102978941_Physeter_catodon	GAUT042129_Glossina_austeni	A0A336KUC9|147_701|4.5e-228|Culicoid		UPI0006B08ED3|31_568|5.5e-228|Limulu
A0A8B7Y6T4|29_538|2.4e-217|Valvatida		LOC102984473_Physeter_catodon	GBRI007185_Glossina_brevipalpis	A0A820IG98|13_534|2.5e-210|Rotaria		LOC102984473_Physeter_catodon	GBRI007185_Glossina_brevipalpis	UPI0006B08ED3|30_568|4.8e-228|Limulu		UPI001E279CA8|18_554|7.9e-228|Coccin
UPI00165AF030|38_540|3.1e-217|Fundul		GLUD2_Pongo_abelii	GMOY007353_Glossina_morsitans	A0A3Q2YBU9|1_487|3.2e-210|Syngnathid		GLUD2_Pongo_abelii	GMOY007353_Glossina_morsitans	UPI001C90C2EC|84_608|5e-228|Thoracic		UPI00065BDDF2|28_532|8.5e-228|Aplysi
Q8JG17|34_537|4e-217|Euteleosteomorp		LOC101033096_Saimiri_boliviensis_bolivi	GPPI017174_Glossina_palpalis	A0A3M7PMT4|40_540|3.7e-210|Brachionu		LOC101033096_Saimiri_boliviensis_bolivi	GPPI017174_Glossina_palpalis	A0A7R9PXP8|30_555|8e-228|Medioppia_s		A0A1D1VP89|62_573|1.1e-227|Ramazzott
A0A3Q2ZZV9|44_544|5.5e-217|Rivulidae		AAEL025958_Aedes_aegypti	LOC111681537_Lucilia_cuprina	A0A1B6GDH7|37_548|5.6e-210|Cuerna_ar		AAEL025958_Aedes_aegypti	LOC111681537_Lucilia_cuprina	A0A1D1VP89|62_573|9.5e-228|Ramazzott		A0A6F8ZMW3|20_528|1.9e-227|Actinopte
A0A151MTA8|1_489|8.1e-217|Crocodylia		5578916;AAEL003757_Aedes_aegypti	101888084_Musca_domestica	UPI000C6EB44B|27_546|7e-210|Centruro		5578916;AAEL003757_Aedes_aegypti	101888084_Musca_domestica	UPI001E279CA8|18_554|9.8e-228|Coccin		A0A7R9PXP8|31_555|2.5e-227|Medioppia
A0A8C4A0A9|8_500|4e-216|Clupeiformes		AALF019078_Aedes_albopictus	101888084_Musca_domestica_0	A0A1W0WTA7|59_565|7.5e-210|Hypsibius		AALF019078_Aedes_albopictus	101888084_Musca_domestica_0	A0A8C7LWJ6|1_541|2.2e-227|Protacanth		C3XQA6|6_507|4.3e-227|Branchiostoma
A0A3S3SHV3|22_558|1.5e-215|Dinothrom		AALB008314_Anopheles_albimanus	LOC108363005_Rhagoletis_zephyria	UPI001403E8FC|39_535|1.8e-209|Petrom		AALB008314_Anopheles_albimanus	LOC108363005_Rhagoletis_zephyria	UPI00065BDDF2|28_532|2.2e-227|Aplysi		UPI0018F2FB61|26_547|5.6e-227|Scylio
A0A7R9BVL0|19_541|1.6e-215|Notodroma		AATE015803_Anopheles_atroparvus	106091372_Stomoxys_calcitrans	A0A816BFE4|6_537|1.8e-209|Adineta		AATE015803_Anopheles_atroparvus	106091372_Stomoxys_calcitrans	C3XQA6|6_507|2.9e-227|Branchiostoma		UPI000C6EB44B|26_548|6e-227|Centruro
A0A814IQ64|34_544|1.8e-215|Brachionu		ACHR002660_Anopheles_christyi	Gdh_2_Zeugodacus_cucurbitae	A0A087Y4J2|38_538|2.9e-209|Cyprinodo		ACHR002660_Anopheles_christyi	Gdh_2_Zeugodacus_cucurbitae	A0A226DZK2|8_543|5.2e-227|Folsomia_c		A0A2T7Q0W9|12_564|6.5e-227|Pomacea_c
UPI000DC6C9BC|1_497|1.8e-215|Canis_l		ACUA009099_Anopheles_culicifacies		A0A8J2LQH2|28_539|3.4e-209|Allacma_f		ACUA009099_Anopheles_culicifacies		A0A8C8I906|1_534|5.4e-227|Oncorhynch		A0A1W0WTA7|56_567|1.1e-226|Hypsibius
UPI001403E8FC|39_537|3e-215|Petromyz		ADAC000629_Anopheles_darlingi		UPI0010547A55|31_530|4e-209|Gouania_		ADAC000629_Anopheles_darlingi		UPI000C6EB44B|27_548|6e-227|Centruro		A0A226DZK2|11_543|1.2e-226|Folsomia_
UPI0003CC1F05|57_559|4.2e-215|Dasypu		ADIR005860_Anopheles_dirus		UPI0003CC1F05|57_558|5.6e-209|Dasypu		ADIR005860_Anopheles_dirus		A0A2T7Q0W9|12_564|7.1e-227|Pomacea_c		A0A814IQ64|27_544|1.6e-226|Brachionu
A0A1B6GDH7|40_548|6.4e-215|Cuerna_ar		AEPI009997_Anopheles_epiroticus		A0A814X4G0|29_553|6.3e-209|Adineta_r		AEPI009997_Anopheles_epiroticus		A0A814IQ64|29_544|1.2e-226|Brachionu		UPI000333EA50|36_546|2.2e-226|Echino
A0A6P7SDM1|27_543|8e-215|Octopus		AFAF014406_Anopheles_farauti		A0A815RS07|6_535|7.1e-209|Rotaria		AFAF014406_Anopheles_farauti		A0A289YHG5|20_548|1.5e-226|Eulimnoga		UPI00083C8FEB|21_552|2.6e-226|Nicrop
UPI00065BDDF2|28_531|1.1e-214|Aplysi		AFUN004525_Anopheles_funestus		A0A818YNY3|26_553|7.9e-209|Adineta_s		AFUN004525_Anopheles_funestus		A0A1W0WTA7|58_567|1.6e-226|Hypsibius		UPI000C77DF09|24_554|2.9e-226|Euryte
A0A087Y4J2|38_540|2.1e-214|Cyprinodo		1275909_Anopheles_gambiae		R7V881|19_533|9.4e-209|Capitella_tel		1275909_Anopheles_gambiae		UPI000333EA50|36_546|1.8e-226|Echino		UPI001D0896EF|24_546|3.4e-226|Chryso
A0A2D4M7S2|1_488|4.2e-214|Sauria		AMAM023018_Anopheles_maculatus		T1JVD9|28_544|1e-208|Tetranychidae		AMAM023018_Anopheles_maculatus		UPI000C77DF09|26_554|3.6e-226|Euryte		A0A289YHG5|23_548|3.4e-226|Eulimnoga
A0A132AGV7|4_514|6.9e-214|Sarcoptes_		AMIN000046_Anopheles_minimus		A0A2D4M7S2|1_487|1.8e-208|Sauria		AMIN000046_Anopheles_minimus		UPI00083C8FEB|20_552|4.3e-226|Nicrop		A0A7J7B657|20_552|4.3e-226|Lampriger
A0A3Q2YBU9|1_489|1.3e-213|Syngnathid		ASTE002830_Anopheles_stephensi		A0A1V9Y381|22_537|1.9e-208|Gamasina		ASTE002830_Anopheles_stephensi		T1JVD9|22_546|4.6e-226|Tetranychidae		A0A553NSB1|62_588|6.4e-226|Tigriopus
A0A817NFH0|12_536|1.8e-213|Rotaria		LOC108970020_Bactrocera_latifrons		A0A7R9LP50|36_557|2.6e-208|Oppiella_		LOC108970020_Bactrocera_latifrons		V5GVB8|17_548|8.6e-226|Anoplophora_g		T1JVD9|21_546|1.1e-225|Tetranychidae
A0A1S3H7F4|4_545|2.2e-213|Lingula_un		LOC106625530_Bactrocera_oleae		A0A6P7SDM1|28_542|3.8e-208|Octopus		LOC106625530_Bactrocera_oleae		A0A7R9LP50|20_559|9.3e-226|Oppiella_		V5GVB8|19_548|1.9e-225|Anoplophora_g
C3XQA6|8_506|2.5e-213|Branchiostoma		LOC101459951_Ceratitis_capitata		A0A016UFE8|17_536|3.9e-208|Strongyli		LOC101459951_Ceratitis_capitata		UPI001D0896EF|29_546|1.2e-225|Chryso		A0A8C7LWJ6|22_541|2.2e-225|Protacant
R7V881|22_534|3.4e-213|Capitella_tel		6040898_Culex_quinquefasciatus		A0A8R1V652|17_537|4e-208|Pristionchu		6040898_Culex_quinquefasciatus		A0A1S3H7F4|9_546|1.3e-225|Lingula_un		UPI001EB03CC3|24_543|2.9e-225|Haliot
A0A820IG98|20_535|6.4e-213|Rotaria		Dana_GF18014_Drosophila_ananassae		A0A818QRX5|3_535|6.9e-208|Adineta_st		Dana_GF18014_Drosophila_ananassae		A0A553NSB1|64_588|1.5e-225|Tigriopus		A0A8C8I906|23_534|3.8e-225|Oncorhync
UPI0010547A55|30_530|7.6e-213|Gouani		LOC108024411_Drosophila_biarmipes		A0A866W1Y1|16_499|1.2e-207|Euteleost		LOC108024411_Drosophila_biarmipes		A0A803T3W9|1_510|1.5e-225|Toxicofera		A0A6J2XP33|25_547|4.1e-225|Sitophilu
A0A6F9DD25|28_543|1.5e-212|Phallusia		LOC108129616_Drosophila_bipectinata		A0A6F9DD25|26_542|2.3e-207|Phallusia		LOC108129616_Drosophila_bipectinata		A0A7J7B657|21_552|1.7e-225|Lampriger		A0A0K2TX10|38_551|4.4e-225|Lepeophth
A0A818YNY3|24_554|3.2e-212|Adineta_s		LOC108604582_Drosophila_busckii		A0A1S3FC21|57_557|2.6e-207|Heteromyi		LOC108604582_Drosophila_busckii		A0A6J2XP33|26_547|4.7e-225|Sitophilu		A0A1S3H7F4|26_546|6.8e-225|Lingula_u
A0A816BFE4|30_538|3.6e-212|Adineta		LOC108148676_Drosophila_elegans		UPI0006B1019B|48_565|2.9e-207|Limulu		LOC108148676_Drosophila_elegans		UPI001EB03CC3|24_543|5.2e-225|Haliot		A0A7R9LP50|37_559|7.8e-225|Oppiella_
A0A866W1Y1|16_499|4.3e-212|Euteleost		Dere_GG12444_Drosophila_erecta		UPI001EB03CC3|29_541|4.7e-207|Haliot		Dere_GG12444_Drosophila_erecta		A0A670ZSZ0|1_517|5.6e-225|Bifurcata		A0A3S3SHV3|7_559|8.5e-225|Dinothromb
K7FG37|1_489|7.1e-212|Archelosauria		LOC108108836_Drosophila_eugracilis		C3XQA6|8_505|5.1e-207|Branchiostoma		LOC108108836_Drosophila_eugracilis		A0A0K2TX10|38_551|6.9e-225|Lepeophth		A0A6F9DD25|23_544|1.1e-224|Phallusia
A0A267FVZ7|21_531|7.5e-212|Macrostom		LOC108091637_Drosophila_ficusphila		A0A0B2UXI4|17_536|5.6e-207|Toxocara_		LOC108091637_Drosophila_ficusphila		A0A6P7SDM1|27_543|7.7e-225|Octopus		A0A1S3WKB7|3_521|1.5e-224|Erinaceus_
A0A814X4G0|32_554|9e-212|Adineta_ric		Dgri_GH20746_Drosophila_grimshawi		A0A1S3H7F4|36_544|1.4e-206|Lingula_u		Dgri_GH20746_Drosophila_grimshawi		A0A6F9DD25|26_544|9.8e-225|Phallusia		A0A6P7SDM1|35_543|1.7e-224|Octopus
A0A8S3SH15|33_533|9.2e-212|Mytilus		LOC111596602_Drosophila_hydei		A0A8S3SH15|31_532|1.4e-206|Mytilus		LOC111596602_Drosophila_hydei		A0A1S3WKB7|4_521|1.1e-224|Erinaceus_		A0A8J2LQH2|22_541|1.9e-224|Allacma_f
A0A2T7Q0W9|61_563|2.2e-211|Pomacea_c		LOC111596601_Drosophila_hydei		K7FG37|1_488|1.5e-206|Archelosauria		LOC111596601_Drosophila_hydei		A0A3S3SHV3|6_559|2e-224|Dinothrombiu		A0A803T3W9|2_510|2.4e-224|Toxicofera
A0A815RS07|21_536|2.5e-211|Rotaria		bb8_Drosophila_melanogaster		A0A814FFR3|20_537|5.1e-206|Bdelloide		bb8_Drosophila_melanogaster		A0A8J2LQH2|23_541|3.3e-224|Allacma_f		A0A1V9Y381|18_539|7.3e-224|Gamasina
A0A1S3FC21|55_558|3.1e-211|Heteromyi		Dmoj_GI23213_Drosophila_mojavensis		UPI000719A84B|31_546|5.1e-206|Priapu		Dmoj_GI23213_Drosophila_mojavensis		A0A1V9Y381|22_539|3.4e-224|Gamasina		UPI0006B1019B|43_567|8.8e-224|Limulu
A0A7R9LK90|38_548|3.4e-211|Oppiella_		Dmoj_GI23212_Drosophila_mojavensis		A0A9D4LPJ0|39_541|1.1e-205|Dreissena		Dmoj_GI23212_Drosophila_mojavensis		UPI0006B1019B|47_567|7e-224|Limulus_		A0A670ZSZ0|1_517|1.1e-223|Bifurcata
A0A8J1UL15|43_546|3.5e-211|Owenia_fu		LOC111073979_Drosophila_obscura		A0A914SEI9|16_535|1.2e-205|Panagrola		LOC111073979_Drosophila_obscura		I3JIJ7|4_494|2.6e-223|Oreochromis		UPI001B889B1A|36_550|2.4e-223|Gigant
UPI000719A84B|21_547|4.1e-211|Priapu		LOC111072941_Drosophila_obscura		A0A3S3SHV3|33_557|1.5e-205|Dinothrom		LOC111072941_Drosophila_obscura		A0A803V801|54_539|3.2e-223|Ficedula_		A0A803V801|54_539|2.8e-223|Ficedula_
UPI0018A0F58D|48_548|5.6e-211|Choloe		FBpp0275247_Drosophila_pseudoobscura		A0A813XP14|29_553|1.5e-205|Adineta		FBpp0275247_Drosophila_pseudoobscura		R7V881|21_534|3.2e-223|Capitella_tel		R7V881|21_534|3.5e-223|Capitella_tel
UPI001EB03CC3|27_542|9.7e-211|Haliot		FBpp0283646_Drosophila_pseudoobscura		A0A814FNV8|56_587|1.6e-205|Rotaria_s		FBpp0283646_Drosophila_pseudoobscura		UPI001B889B1A|31_550|4.2e-223|Gigant		A0A8S3SH15|30_534|6.4e-223|Mytilus
A0A210QM77|8_536|1.2e-210|Pectinidae		LOC108051547_Drosophila_rhopaloa		A0A814DH17|55_586|1.9e-205|Rotaria_s		LOC108051547_Drosophila_rhopaloa		A0A667YHC9|1_539|1.2e-222|Myripristi		A0A9D4LPJ0|34_542|8.7e-223|Dreissena
A0A9D4LPJ0|39_542|1.5e-210|Dreissena		LOC110191013_Drosophila_serrata		A0A1I9WLI4|32_517|2e-205|cellular_or		LOC110191013_Drosophila_serrata		A0A8J1UL15|33_547|1.3e-222|Owenia_fu		I3JIJ7|4_494|1.3e-222|Oreochromis
A0A3M7PMT4|41_542|2.5e-210|Brachionu		LOC108069796_Drosophila_takahashii		A0A818N3E9|34_539|2.8e-205|Rotaria		LOC108069796_Drosophila_takahashii		A0A8S3SH15|29_534|1.4e-222|Mytilus		UPI000719A84B|22_548|1.4e-222|Priapu
A0A7R9GA02|15_482|3.8e-210|Notodroma		Dvir_GJ22871_Drosophila_virilis		UPI000C758B05|32_550|3.6e-205|Euryte		Dvir_GJ22871_Drosophila_virilis		A0A673X459|1_540|1.6e-222|Salmoninae		A0A8J1UL15|33_547|1.6e-222|Owenia_fu
UPI00193A9516|27_542|5.7e-210|Styela		Dvir_GJ22872_Drosophila_virilis		UPI001B889B1A|35_548|4.2e-205|Gigant		Dvir_GJ22872_Drosophila_virilis		A0A3M7PMT4|40_542|2.5e-222|Brachionu		A0A3M7PMT4|39_542|1.8e-222|Brachionu
UPI000C758B05|30_551|7.1e-210|Euryte		Dwil_GK11580_Drosophila_willistoni		A0A815ALQ6|29_553|4.2e-205|Rotaria		Dwil_GK11580_Drosophila_willistoni		A0A9D4LPJ0|35_542|2.7e-222|Dreissena		A0A2C9KAQ3|28_530|2.7e-222|Biomphala
A0A1I8HWC5|23_534|7.3e-210|Macrostom		Dyak_GE23967_Drosophila_yakuba		A0A8C8I906|43_532|5e-205|Oncorhynchu		Dyak_GE23967_Drosophila_yakuba		UPI000719A84B|21_548|3.3e-222|Priapu		A0A6P7G9B3|22_552|2.9e-222|Chrysomel
A0A4Y2B1U7|1_490|7.6e-210|Entelegyna		LOC105273074_Fopius_arisanus		A0A3S0ZXG2|18_531|6.6e-205|Elysia_ch		LOC105273074_Fopius_arisanus		A0A6P7G9B3|26_552|3.4e-222|Chrysomel		A0A3S0ZXG2|23_533|3.7e-222|Elysia_ch
D6WCS6|28_547|1.1e-209|Tribolium		GBRI041814_Glossina_brevipalpis		UPI0018A0F58D|48_546|7.2e-205|Choloe		GBRI041814_Glossina_brevipalpis		A0A3S0ZXG2|25_533|3.8e-222|Elysia_ch		A0A817NFH0|22_536|5.5e-222|Rotaria
UPI001B889B1A|32_549|1.2e-209|Gigant		GMOY007550_Glossina_morsitans		A0A267FVZ7|18_529|7.9e-205|Macrostom		GMOY007550_Glossina_morsitans		A0A2C9KAQ3|29_530|8.6e-222|Biomphala		A0A818YNY3|22_554|6e-222|Adineta_ste
A0A814FNV8|56_588|1.8e-209|Rotaria_s		GMOY008640_Glossina_morsitans		A0A8J1UL15|43_545|8.7e-205|Owenia_fu		GMOY008640_Glossina_morsitans		A0A817NFH0|24_536|1.3e-221|Rotaria		A0A8S3ZT97|29_530|7.2e-222|Candidula
UPI0022E190AA|42_544|2.4e-209|Mya_ar		GPPI009868_Glossina_palpalis		A0A2C9KAQ3|29_528|1.2e-204|Biomphala		GPPI009868_Glossina_palpalis		A0A818YNY3|25_554|1.6e-221|Adineta_s		A0A210QM77|32_537|9.4e-222|Pectinida
A0A814DH17|55_587|3.2e-209|Rotaria_s		LOC111690779_Lucilia_cuprina		UPI001E1DB34E|37_541|1.2e-204|Mercen		LOC111690779_Lucilia_cuprina		A0A210QM77|33_537|2.3e-221|Pectinida		A0A820IG98|22_535|1.3e-221|Rotaria
A0A2C9KAQ3|29_529|4.1e-209|Biomphala		101893797_Musca_domestica		A0A915JLF3|39_565|1.5e-204|Romanomer		101893797_Musca_domestica		A0A820IG98|24_535|2.6e-221|Rotaria		A0A816BFE4|24_538|2.6e-221|Adineta
		LOC108365997_Rhagoletis_zephyria				LOC108365997_Rhagoletis_zephyria
		106082796_Stomoxys_calcitrans				106082796_Stomoxys_calcitrans
		LOC105219584_Zeugodacus_cucurbitae				LOC105219584_Zeugodacus_cucurbitae

## Sheet: Gdh_sum
Consurf homology search													Diptera Gdh-like												Diptera, mammalian												Diptera, Bb8 and Gdh-like
from -0.769 to -0.598 the grade is 9													from -0.595 to -0.463 the grade is 9												from -1.037 to -0.807 the grade is 9												from -0.858 to -0.667 the grade is 9
from -0.598 to -0.427 the grade is 8													from -0.463 to -0.331 the grade is 8												from -0.807 to -0.576 the grade is 8												from -0.667 to -0.477 the grade is 8
from -0.427 to -0.256 the grade is 7								Average COLOR - with sufficient data					from -0.331 to -0.198 the grade is 7								Average COLOR - with sufficient data				from -0.576 to -0.346 the grade is 7								Average COLOR - with sufficient data				from -0.477 to -0.286 the grade is 7								Average COLOR - with sufficient data
from -0.256 to -0.085 the grade is 6								6.59353					from -0.198 to -0.066 the grade is 6								7.55864				from -0.346 to -0.115 the grade is 6								6.10498				from -0.286 to -0.095 the grade is 6								6.3975
from -0.085 to 0.342 the grade is 5													from -0.066 to 0.504 the grade is 5												from -0.115 to 0.363 the grade is 5												from -0.095 to 0.369 the grade is 5
from 0.342 to 1.026 the grade is 4													from 0.504 to 1.513 the grade is 4												from 0.363 to 1.088 the grade is 4												from 0.369 to 1.108 the grade is 4
from 1.026 to 1.709 the grade is 3													from 1.513 to 2.522 the grade is 3												from 1.088 to 1.813 the grade is 3												from 1.108 to 1.846 the grade is 3
from 1.709 to 2.393 the grade is 2													from 2.522 to 3.531 the grade is 2												from 1.813 to 2.538 the grade is 2												from 1.846 to 2.585 the grade is 2
from 2.393 to 3.077 the grade is 1													from 3.531 to 4.540 the grade is 1												from 2.538 to 3.263 the grade is 1												from 2.585 to 3.323 the grade is 1
POS	SEQ	3LATOM	SCORE	COLOR	CONFIDENCE INTERVAL	CONFIDENCE INTERVAL COLORS	B/E	FUNCTION	MSA DATA	RESIDUE VARIETY			POS	SEQ	3LATOM	SCORE	COLOR	CONFIDENCE INTERVAL	CONFIDENCE INTERVAL COLORS	B/E	FUNCTION	MSA DATA	RESIDUE VARIETY		POS	SEQ	3LATOM	SCORE	COLOR	CONFIDENCE INTERVAL	CONFIDENCE INTERVAL COLORS	B/E	FUNCTION	MSA DATA	RESIDUE VARIETY		POS	SEQ	3LATOM	SCORE	COLOR	CONFIDENCE INTERVAL	CONFIDENCE INTERVAL COLORS	B/E	FUNCTION	MSA DATA	RESIDUE VARIETY
			(normalized)													(normalized)												(normalized)												(normalized)
1	M	MET:1:A	0.112	5	-0.201, 0.241	6.5	e		49/150	M,L,A,H,I,V,S,N			1	M	MET:1:A	-0.583	9	-0.713, -0.564	9.9	e	f	41/47	M		1	M	MET:1:A	0.483	4	0.002, 0.636	5.4	e		109/152	M,I,V,T,A,L,G,K,R,P		1	M	MET:1:A	0.536	4	0.037, 0.797	5.4	e		56/103	S,C,K,E,N,M
2	Y	TYR:2:A	1.197	3	0.485, 1.405	4.3	e		42/150	Y,F,L,V,I			2	Y	TYR:2:A	0.391	5*	-0.367, 0.971	8.4	e		41/47	F,Y		2	Y	TYR:2:A	2.860	1	1.243, 3.269	3.1	e		122/152	Y,M,F,T,L,R,Q,K,I		2	Y	TYR:2:A	2.131	2	0.797, 3.323	4.1	e		59/103	L,I,P,R,M,K,C,F,Y
3	H	HIS:3:A	1.251	3	0.485, 1.405	4.3	e		37/150	H,Q,N,P,K,S,G,Y			3	H	HIS:3:A	0.056	5*	-0.482, 0.382	9.5	e		41/47	H,Q		3	H	HIS:3:A	2.091	2	1.243, 3.269	3.1	e		122/152	R,K,H,Q,T,N,L,S,F,P,A		3	H	HIS:3:A	0.843	4	0.335, 1.155	5.3	e		80/103	A,V,L,G,M,K,R,I,P,H,Q
4	L	LEU:4:A	0.660	4	0.059, 0.834	5.4	e		39/150	L,I,V,A,F,S			4	L	LEU:4:A	-0.501	9	-0.713, -0.482	9.9	e	f	41/47	L		4	L	LEU:4:A	3.258	1	1.789, 3.269	3.1	e		121/152	A,L,K,F,V,G,T,S,N,I,M,Y		4	L	LEU:4:A	1.310	3	0.536, 1.727	4.3	e		91/103	R,M,Q,K,L,F,I
5	K	LYS:5:A	0.639	4	0.059, 0.834	5.4	e		39/150	K,R,S,H			5	K	LYS:5:A	-0.529	9	-0.713, -0.527	9.9	e	f	41/47	K		5	K	LYS:5:A	3.174	1	1.789, 3.269	3.1	e		118/152	L,M,S,K,Q,F,I,A,G,R,V,H,C,P		5	K	LYS:5:A	1.939	2	1.155, 1.727	3.3	e		91/103	T,N,H,Q,L,S,F,R,P,K,A
6	S	SER:6:A	2.345	2	0.834, 3.077	4.1	e		40/150	S,N,T,R,A,L,G,M			6	S	SER:6:A	1.169	4	0.186, 1.453	5.4	e		41/47	T,N,S		6	S	SER:6:A	3.249	1	1.789, 3.269	3.1	e		116/152	L,R,Q,T,N,S,K,Y,M,G,F,H,V,C		6	S	SER:6:A	2.543	2	1.155, 3.323	3.1	e		91/103	R,S,T,H,L,C,Y,N,G,M,K,V,P
7	L	LEU:7:A	0.666	4	0.241, 0.834	5.4	e		41/150	L,I,M,V,F			7	L	LEU:7:A	0.088	5*	-0.482, 0.382	9.5	e		41/47	I,L		7	L	LEU:7:A	2.719	1	1.243, 3.269	3.1	e		121/152	L,I,V,M,P,T,H,Y,N,S,G,K,R,Q		7	L	LEU:7:A	3.094	1	1.727, 3.323	3.1	e		91/103	L,F,G,I,P,S,V,M,A,Y,T,N,C
8	A	ALA:8:A	1.233	3	0.485, 1.405	4.3	e		40/150	A,V,T,S,E,G,P			8	A	ALA:8:A	-0.543	9	-0.713, -0.527	9.9	e	f	41/47	A		8	A	ALA:8:A	3.170	1	1.789, 3.269	3.1	e		113/152	S,A,P,I,V,Y,F,L,C,M,G,K,Q,R,E		8	A	ALA:8:A	3.095	1	1.727, 3.323	3.1	e		91/103	P,R,E,V,A,S,G,T,Q,N,Y
9	R	ARG:9:A	0.455	4	0.059, 0.834	5.4	e		40/150	R,K,S,G			9	R	ARG:9:A	0.163	5	-0.430, 0.382	8.5	e		41/47	K,R		9	R	ARG:9:A	0.663	4	0.124, 0.893	5.4	e		111/152	X,R,N,K,Y,S,P,L,E,F,A		9	R	ARG:9:A	1.605	3	0.797, 1.727	4.3	e		91/103	V,G,Q,A,K,D,P,S,N,R,M,T
10	Q	GLN:10:A	2.488	1	0.834, 3.077	4.1	e		40/150	Q,T,I,L,S,N,H,R,C,A,F,K			10	Q	GLN:10:A	1.806	3	0.634, 2.251	4.3	e		41/47	S,N,Q,H		10	Q	GLN:10:A	3.250	1	1.789, 3.269	3.1	e		102/152	G,I,A,V,P,T,S,N,Q,H,L,R,C,F		10	Q	GLN:10:A	3.313	1	1.727, 3.323	3.1	e		91/103	G,A,V,T,S,N,I,L,M,K,Y,Q,H
11	G	GLY:11:A	2.998	1	1.405, 3.077	3.1	e		39/150	G,P,A,S,T,V,F,L,I			11	G	GLY:11:A	0.136	5*	-0.482, 0.382	9.5	e		41/47	A,G		11	G	GLY:11:A	3.246	1	1.789, 3.269	3.1	e		100/152	G,W,A,R,C,L,F,Q,Y,I,V,T,N,P,H		11	G	GLY:11:A	3.239	1	1.727, 3.323	3.1	e		88/103	L,F,I,A,G,R,V,H,S,C,P
12	A	ALA:12:A	3.074	1	1.405, 3.077	3.1	e		40/150	A,I,T,K,L,V,G,S,N,P			12	A	ALA:12:A	0.064	5*	-0.482, 0.382	9.5	e		41/47	A,T		12	A	ALA:12:A	0.729	4	0.124, 1.243	5.3	e		78/152	P,A,T,K,V		12	A	ALA:12:A	3.293	1	1.727, 3.323	3.1	e		86/103	K,S,L,Y,M,G,F,H,V,N,R,C,A,T
13	R	ARG:13:A	3.074	1	1.405, 3.077	3.1	e		40/150	R,V,A,S,K,I,T,L,G,Q,P			13	R	ARG:13:A	4.533	1	2.251, 4.598	3.1	e		41/47	L,I,V,A,M,R		13	R	ARG:13:A	3.198	1	1.789, 3.269	3.1	e		75/152	P,A,D,S,L,I,V,M,R,T,F		13	R	ARG:13:A	3.304	1	1.727, 3.323	3.1	e		89/103	I,L,H,Y,N,S,G,K,R,Q,P,V,A,M
14	R	ARG:14:A	3.024	1	1.405, 3.077	3.1	e		35/150	R,Q,M,N,A,G,S,V,K,P,T,L,I			14	R	ARG:14:A	1.646	3	0.382, 2.251	5.3	e		41/47	K,R,H		14	R	ARG:14:A	2.012	2	0.893, 3.269	4.1	e		72/152	A,D,V,K,R,H,S		14	R	ARG:14:A	3.236	1	1.727, 3.323	3.1	e		81/103	L,F,C,M,G,I,V,K,Q,R,E,H
15	Q	GLN:15:A	2.920	1	1.405, 3.077	3.1	e		47/150	Q,N,K,P,R,I,A,S,C,G,T,V			15	Q	GLN:15:A	-0.441	8	-0.711, -0.430	9.8	e	f	27/47	Q		15	Q	GLN:15:A	1.630	3	0.433, 3.269	4.1	e		57/152	L,T,S,Q,P,A		15	Q	GLN:15:A	-0.518	8	-0.865, -0.410	9.7	e	f	27/103	Q
16	Q	GLN:16:A	3.076	1	1.405, 3.077	3.1	e		48/150	Q,K,I,N,S,A,L,C,E,V,T,F,G			16	Q	GLN:16:A	1.718	3	0.634, 2.251	4.3	e		41/47	Q,N,H,P		16	Q	GLN:16:A	2.603	1	1.243, 3.269	3.1	e		72/152	G,K,A,S,Q,N,H,P,T		16	Q	GLN:16:A	1.034	4	0.335, 1.155	5.3	e		81/103	R,Y,P,L,N,E,F,A,Q,H
17	E	GLU:17:A	2.949	1	1.405, 3.077	3.1	e		49/150	E,D,A,L,N,V,H,S,Q,I,G			17	E	GLU:17:A	0.220	5*	-0.430, 0.634	8.4	e		41/47	E,D		17	E	GLU:17:A	1.698	3	0.636, 1.789	4.3	e		72/152	S,I,A,P,L,E,D,N		17	E	GLU:17:A	2.864	1	1.155, 3.323	3.1	e		72/103	L,P,A,R,S,C,F,I,N,E,D
18	L	LEU:18:A	3.076	1	1.405, 3.077	3.1	e		48/150	L,F,V,K,M,I,A,T,N,G,W			18	L	LEU:18:A	1.342	4	0.186, 2.251	5.3	e		41/47	V,L,A		18	L	LEU:18:A	1.604	3	0.636, 1.789	4.3	e		72/152	A,V,F,L,P		18	L	LEU:18:A	3.316	1	1.727, 3.323	3.1	e		70/103	R,C,A,L,F,Q,Y,I,V,T,N,G,P,H
19	A	ALA:19:A	2.956	1	1.405, 3.077	3.1	e		54/150	A,K,S,Q,V,T,N,R,G,E,P,C,H			19	A	ALA:19:A	4.032	1	2.251, 4.598	3.1	e		41/47	S,A,T,G		19	A	ALA:19:A	3.165	1	1.789, 3.269	3.1	e		72/152	A,S,T,G,W,M		19	A	ALA:19:A	2.511	2	1.155, 3.323	3.1	e		48/103	K,V,S,A,T,G
20	T	THR:20:A	2.967	1	1.405, 3.077	3.1	e		55/150	T,K,A,Q,H,R,S,I,C,N,V,E,M,D			20	T	THR:20:A	1.161	4	0.186, 1.453	5.4	e		41/47	T,S,A		20	T	THR:20:A	1.423	3	0.433, 1.789	4.3	e		72/152	A,T,S,P,N		20	T	THR:20:A	1.168	3	0.335, 1.727	5.3	e		45/103	F,T,S,A
21	L	LEU:21:A	1.457	3	0.834, 1.405	4.3	e		58/150	L,F,V,E,I,M,A,C			21	L	LEU:21:A	0.275	5*	-0.430, 0.634	8.4	e		41/47	L,F		21	L	LEU:21:A	0.549	4	-0.201, 0.893	6.4	e		47/152	P,L,F,R		21	L	LEU:21:A	-0.258	6*	-0.692, -0.079	9.5	e		45/103	L,F
22	A	ALA:22:A	2.970	1	1.405, 3.077	3.1	e		59/150	A,T,L,V,M,S,I,P,H,C			22	A	ALA:22:A	0.536	4	-0.205, 0.971	7.4	e		41/47	V,A		22	A	ALA:22:A	0.382	4	-0.201, 0.636	6.4	e		75/152	A,S,V,Q		22	A	ALA:22:A	0.509	4	-0.178, 0.797	6.4	e		45/103	Q,V,A
23	K	LYS:23:A	0.709	4	0.241, 0.834	5.4	e		58/150	K,A,R,N,Q,P,G,H,T			23	K	LYS:23:A	-0.529	9	-0.713, -0.527	9.9	e	f	41/47	K		23	K	LYS:23:A	0.643	4	0.002, 0.893	5.4	e		77/152	A,V,S,R,P,K,G,Q		23	K	LYS:23:A	-0.489	8	-0.752, -0.342	9.7	e	f	47/103	Q,K
24	A	ALA:24:A	3.073	1	1.405, 3.077	3.1	e		58/150	A,I,V,Y,R,F,H,S,T,Q,M,L,P,G,C,N			24	A	ALA:24:A	0.683	4	-0.099, 0.971	6.4	e		41/47	A,V		24	A	ALA:24:A	2.154	2	0.893, 3.269	4.1	e		83/152	L,A,V,W,S,T,F,I		24	A	ALA:24:A	2.338	2	1.155, 3.323	3.1	e		53/103	W,S,T,F,L,I,A,V
25	L	LEU:25:A	3.077	1	1.405, 3.077	3.1	e		59/150	L,I,T,V,A,S,C,Q,G			25	L	LEU:25:A	2.473	3	0.971, 4.598	4.1	e		41/47	A,V,L,M		25	L	LEU:25:A	3.123	1	1.789, 3.269	3.1	e		87/152	L,A,V,M,W,S,P,K,I,N,T		25	L	LEU:25:A	3.158	1	1.727, 3.323	3.1	e		56/103	W,L,S,P,K,I,M,N,T,A,V
26	P	PRO:26:A	2.946	1	1.405, 3.077	3.1	e		60/150	P,A,T,S,C,Y,V,L,Q,R,K			26	P	PRO:26:A	1.280	4	0.186, 2.251	5.3	e		41/47	T,A,P		26	P	PRO:26:A	2.761	1	1.243, 3.269	3.1	e		86/152	G,L,T,A,P,E,S,X		26	P	PRO:26:A	1.687	3	0.536, 1.727	4.3	e		55/103	P,S,X,E,L,G,T,A
27	T	THR:27:A	3.028	1	1.405, 3.077	3.1	e		64/150	T,V,A,S,I,P,G,C,K,M,N,R			27	T	THR:27:A	1.145	4	0.029, 1.453	5.4	e		31/47	V,T,A		27	T	THR:27:A	2.989	1	1.789, 3.269	3.1	e		81/152	W,R,T,V,A,Q,I,L,P		27	T	THR:27:A	1.850	2	0.797, 3.323	4.1	e		49/103	I,L,V,R,P,Q,T,A
28	A	ALA:28:A	1.566	3	0.834, 1.405	4.3	e		65/150	A,V,I,T,L,S,F,H,Y			28	A	ALA:28:A	0.943	4	0.029, 1.453	5.4	e		38/47	A,S,I		28	A	ALA:28:A	3.188	1	1.789, 3.269	3.1	e		104/152	A,D,S,I,K,T,G,P,R,M,C,L,V		28	A	ALA:28:A	3.226	1	1.727, 3.323	3.1	e		72/103	G,S,P,R,A,M,C,T,L,V,I
29	V	VAL:29:A	3.077	1	1.405, 3.077	3.1	e		63/150	V,L,I,T,Q,C,G,A,W,S,F,Y,R,N,D,M			29	V	VAL:29:A	3.934	1	1.453, 4.598	4.1	e		41/47	A,V,T		29	V	VAL:29:A	3.259	1	1.789, 3.269	3.1	e		99/152	R,G,A,V,T,P,C,Q,S,L		29	V	VAL:29:A	3.250	1	1.727, 3.323	3.1	e		67/103	P,C,Q,V,S,R,L,A,T
30	M	MET:30:A	3.077	1	1.405, 3.077	3.1	e		59/150	M,H,A,I,Q,W,S,T,L,V,C,N,D,K,G,E			30	M	MET:30:A	2.536	2	0.971, 4.598	4.1	e		40/47	Q,L,A,M		30	M	MET:30:A	3.263	1	1.789, 3.269	3.1	e		98/152	G,D,Q,L,A,M,V,W,K,P,R,C		30	M	MET:30:A	3.312	1	1.727, 3.323	3.1	e		66/103	V,K,G,P,R,D,L,A,M,Q,C
31	Q	GLN:31:A	3.077	1	1.405, 3.077	3.1	e		64/150	Q,S,V,N,E,I,G,T,R,L,Y,C,D,K,A,H			31	Q	GLN:31:A	2.763	2	0.971, 4.598	4.1	e		40/47	H,Q,S,P		31	Q	GLN:31:A	2.191	2	1.243, 3.269	3.1	e		99/152	Q,R,A,H,S,P,G,Y,E,K,L		31	Q	GLN:31:A	1.385	3	0.536, 1.727	4.3	e		67/103	S,P,E,Q,K,L,H,G,A
32	S	SER:32:A	2.956	1	1.405, 3.077	3.1	e		82/150	S,Q,P,V,T,N,L,A,C,W,I,K,G,Y			32	S	SER:32:A	4.147	1	2.251, 4.598	3.1	e		40/47	P,S,N,T,A		32	S	SER:32:A	3.249	1	1.789, 3.269	3.1	e		97/152	P,A,S,N,T,H,M,L,G,I,V,R,F		32	S	SER:32:A	3.307	1	1.727, 3.323	3.1	e		65/103	M,L,G,I,V,R,H,P,F,S,N,T,A
33	S	SER:33:A	3.075	1	1.405, 3.077	3.1	e		83/150	S,R,A,Q,T,K,N,V,Y,C,H,L,D,G,P,E,I,F			33	S	SER:33:A	4.233	1	2.251, 4.598	3.1	e		21/47	Q,K,M,R,S,T,A		33	S	SER:33:A	2.900	1	1.789, 3.269	3.1	e		51/152	Q,R,K,M,S,T,A,P,X		33	S	SER:33:A	3.311	1	1.727, 3.323	3.1	e		57/103	I,F,C,T,V,K,Q,H,R,L,M,S,A
34	R	ARG:34:A	1.183	3	0.485, 1.405	4.3	e		85/150	R,S,G,Y,Q,L,V,P,D,A,N,I,T,H			34	R	ARG:34:A	-0.518	9	-0.713, -0.482	9.9	e	f	42/47	R		34	R	ARG:34:A	-0.052	5	-0.561, 0.266	7.5	e		74/152	P,R,A		34	R	ARG:34:A	-0.839	9	-0.894, -0.820	9.9	e	f	92/103	R
35	G	GLY:35:A	3.077	1	1.405, 3.077	3.1	e		85/150	G,A,S,T,N,P,I,D,E,L,Q,V,R,H,C,F			35	G	GLY:35:A	3.709	1	1.453, 4.598	4.1	e		42/47	P,G,T,S,N		35	G	GLY:35:A	2.515	2	1.243, 3.269	3.1	e		74/152	G,P,T,S,N,A		35	G	GLY:35:A	3.323	1	1.727, 3.323	3.1	e		93/103	L,R,S,G,Q,A,E,H,W,D,Y,N,F,M,P,T
36	Y	TYR:36:A	3.070	1	1.405, 3.077	3.1	e		85/150	Y,C,L,R,W,F,G,N,T,I,S,Q,D,M,A,P			36	Y	TYR:36:A	-0.489	9	-0.711, -0.482	9.9	e	f	42/47	Y		36	Y	TYR:36:A	2.063	2	0.893, 3.269	4.1	e		74/152	L,F,Y,V,T,S		36	Y	TYR:36:A	-0.559	8	-0.875, -0.470	9.7	e	f	43/103	Y
37	A	ALA:37:A	1.117	3	0.485, 1.405	4.3	e		81/150	A,S,L,Y,E,N,H,T,Q,G,K,I,R			37	A	ALA:37:A	0.411	5*	-0.367, 0.971	8.4	e		27/47	S,A		37	A	ALA:37:A	1.256	3	0.433, 1.789	4.3	e		70/152	A,V,S,P,T		37	A	ALA:37:A	-0.051	5	-0.617, 0.335	8.5	e		38/103	S,A
38	T	THR:38:A	1.256	3*	0.059, 3.077	5.1	e		4/150	T,S,D			38	T	THR:38:A	2.842	2	0.971, 4.598	4.1	e		26/47	S,A,T		38	T	THR:38:A	1.035	4	0.002, 1.789	5.3	e		16/152	S,T		38	T	THR:38:A	2.011	2	0.536, 3.323	4.1	e		16/103	S,T
39	E	GLU:39:A	3.061	1	1.405, 3.077	3.1	e		87/150	E,D,I,Q,T,V,S,M,R,A,P,K,G,L,N			39	E	GLU:39:A	2.051	3	0.634, 2.251	4.3	e		37/47	Q,E,D		39	E	GLU:39:A	1.014	4	0.433, 1.243	4.3	e		88/152	Q,E,D,A,K,L		39	E	GLU:39:A	0.783	4	0.335, 1.155	5.3	e		88/103	Q,A,K,E,L,D
40	H	HIS:40:A	0.204	5	-0.085, 0.241	5.5	b		95/150	H,Y,A,W,L,S,P,V,N,F,R,Q,D,T			40	H	HIS:40:A	0.134	5*	-0.482, 0.382	9.5	b		37/47	H,Y		40	H	HIS:40:A	-0.853	9	-1.017, -0.759	9.8	b	s	88/152	H,Y		40	H	HIS:40:A	-0.727	9	-0.837, -0.656	9.8	b	s	88/103	H,Y
41	Q	GLN:41:A	1.303	3	0.834, 1.405	4.3	e		98/150	Q,E,D,K,V,R,T,S,A,N,I			41	Q	GLN:41:A	-0.561	9	-0.713, -0.527	9.9	e	f	42/47	Q		41	Q	GLN:41:A	0.990	4	0.433, 1.243	4.3	e		93/152	Q,T,N,A,S,V,E,K		41	Q	GLN:41:A	0.821	4	0.335, 1.155	5.3	e		93/103	T,N,A,S,V,E,Q,K
42	I	ILE:42:A	0.027	5	-0.201, 0.059	6.5	e		101/150	I,M,L,S,V,H,T,Q,F,R,A,P			42	I	ILE:42:A	-0.574	9	-0.713, -0.564	9.9	e	f	42/47	I		42	I	ILE:42:A	0.432	4	0.002, 0.636	5.4	e		125/152	L,P,I,T,R,M,V		42	I	ILE:42:A	0.050	5	-0.266, 0.172	6.5	e		93/103	I,M,V
43	P	PRO:43:A	0.704	4	0.241, 0.834	5.4	e		102/150	P,S,R,C,H,E,V,T,F,D,L			43	P	PRO:43:A	-0.409	8	-0.711, -0.367	9.8	e	f	42/47	P		43	P	PRO:43:A	-0.463	7	-0.759, -0.287	8.6	e		125/152	A,P,S		43	P	PRO:43:A	-0.809	9	-0.894, -0.778	9.9	e	f	93/103	P
44	D	ASP:44:A	1.320	3	0.834, 1.405	4.3	e		105/150	D,E,S,R,H,Y,T,A,L,P			44	D	ASP:44:A	3.399	2	1.453, 4.598	4.1	e		42/47	E,D		44	D	ASP:44:A	0.983	4	0.433, 1.243	4.3	e		125/152	A,G,T,E,D,S,I,K,P		44	D	ASP:44:A	0.230	5	-0.178, 0.536	6.4	e		93/103	K,P,E,D
45	R	ARG:45:A	1.139	3	0.485, 1.405	4.3	e		113/150	R,K,H,Y,N,S,D,A,E,V,C,T,Q,G			45	R	ARG:45:A	-0.518	9	-0.713, -0.482	9.9	e	f	42/47	R		45	R	ARG:45:A	1.202	3	0.636, 1.789	4.3	e		124/152	R,P,Q,S,E,H,Y,N,K,D		45	R	ARG:45:A	0.903	4	0.335, 1.155	5.3	e		93/103	E,H,Y,N,K,R,D
46	L	LEU:46:A	0.504	4	0.059, 0.834	5.4	b		124/150	L,F,V,S,A,I,R,T,K,D,P,Y,M			46	L	LEU:46:A	-0.502	9	-0.713, -0.482	9.9	b	s	42/47	L		46	L	LEU:46:A	-0.634	8	-0.874, -0.501	9.7	b		96/152	R,L,W		46	L	LEU:46:A	-0.822	9	-0.894, -0.800	9.9	b	s	93/103	L
47	K	LYS:47:A	1.144	3	0.485, 1.405	4.3	e		126/150	K,Q,R,H,L,S,T,E,A,D,V,C,P			47	K	LYS:47:A	-0.531	9	-0.713, -0.527	9.9	e	f	42/47	K		47	K	LYS:47:A	0.154	5	-0.201, 0.433	6.4	e		123/152	R,K,E,Q		47	K	LYS:47:A	0.187	5	-0.178, 0.335	6.5	e		93/103	E,Q,K,R
48	D	ASP:48:A	1.362	3	0.834, 1.405	4.3	e		133/150	D,H,N,Y,G,E,S,A,T,V,I,Q,K,P			48	D	ASP:48:A	1.852	3	0.382, 2.251	5.3	e		42/47	D,S,H,T		48	D	ASP:48:A	2.752	1	1.243, 3.269	3.1	e		123/152	H,Q,L,D,S,T,R,A,C,K,N		48	D	ASP:48:A	2.266	2	1.155, 3.323	3.1	e		93/103	Q,A,S,C,K,N,D,H,T
49	V	VAL:49:A	0.917	4	0.485, 0.834	4.4	b		136/150	V,I,M,S,G,A,E,K,R,D,L,Q,P,H,T			49	V	VAL:49:A	-0.567	9	-0.713, -0.564	9.9	b	s	42/47	V		49	V	VAL:49:A	0.336	5	-0.106, 0.636	5.4	b		124/152	Y,V,H,F,I,M		49	V	VAL:49:A	-0.039	5	-0.342, 0.172	7.5	b		93/103	I,V,M
50	P	PRO:50:A	2.995	1	1.405, 3.077	3.1	e		141/150	P,S,G,A,E,D,N,T,I,K,V,Q,H,R			50	P	PRO:50:A	2.783	2	0.971, 4.598	4.1	e		42/47	G,S,A,P		50	P	PRO:50:A	1.256	3	0.636, 1.789	4.3	e		124/152	S,G,A,P,R,E,I,L		50	P	PRO:50:A	1.681	3	0.797, 1.727	4.3	e		93/103	S,A,P,R,E,I,L,G
51	T	THR:51:A	2.851	1	1.405, 3.077	3.1	e		141/150	T,D,S,E,V,N,R,G,K,Q,P,A,L,H			51	T	THR:51:A	0.028	5*	-0.482, 0.382	9.5	e		42/47	T,D		51	T	THR:51:A	1.193	3	0.636, 1.789	4.3	e		124/152	E,T,D,K,R,S,I,N,V,Q		51	T	THR:51:A	0.591	4	0.172, 0.797	5.4	e		93/103	K,T,I,N,V,S,Q,D,E
52	A	ALA:52:A	1.444	3	0.834, 1.405	4.3	e		142/150	A,S,H,D,N,E,Q,K,P,V,L,T,G,R			52	A	ALA:52:A	0.663	4	-0.099, 0.971	6.4	e		42/47	A,S		52	A	ALA:52:A	0.307	5	-0.106, 0.636	5.4	e		124/152	A,S,L,E,D		52	A	ALA:52:A	0.133	5	-0.178, 0.335	6.5	e		93/103	E,D,A,S
53	K	LYS:53:A	1.293	3	0.834, 1.405	4.3	e		142/150	K,Q,E,A,P,R,S,L,D,G,H			53	K	LYS:53:A	0.829	4	-0.099, 1.453	6.4	e		42/47	A,P,K		53	K	LYS:53:A	0.729	4	0.124, 1.243	5.3	e		75/152	V,A,P,K,T		53	K	LYS:53:A	0.149	5	-0.178, 0.335	6.5	e		93/103	K,R,Q,T,N,A,E,P
54	D	ASP:54:A	0.136	5	-0.085, 0.241	5.5	e		142/150	D,N,S,K,E,H,G,A			54	D	ASP:54:A	0.754	4	-0.099, 1.453	6.4	e		42/47	S,N,D		54	D	ASP:54:A	0.209	5	-0.201, 0.433	6.4	e		123/152	D,S,N,K,T		54	D	ASP:54:A	0.114	5	-0.266, 0.335	6.5	e		93/103	D,N,K,T,S
55	P	PRO:55:A	-0.260	7	-0.442, -0.201	8.6	b		143/150	P,V,F,S,T,L,H			55	P	PRO:55:A	-0.409	8	-0.711, -0.367	9.8	b		42/47	P		55	P	PRO:55:A	-0.961	9	-1.073, -0.907	9.9	b	s	123/152	P		55	P	PRO:55:A	-0.809	9	-0.894, -0.778	9.9	b	s	93/103	P
56	R	ARG:56:A	0.375	4	0.059, 0.485	5.4	e		144/150	R,K,S,L,N,E,G,Y,P,T,D,Q			56	R	ARG:56:A	-0.518	9	-0.713, -0.482	9.9	e	f	42/47	R		56	R	ARG:56:A	0.523	4	0.124, 0.893	5.4	e		123/152	N,R,A,S,K,P,E,G		56	R	ARG:56:A	0.311	5	-0.079, 0.536	5.4	e		93/103	K,P,S,E,R,G,N
57	F	PHE:57:A	-0.723	9	-0.762, -0.695	9.9	b	s	144/150	F,L			57	F	PHE:57:A	-0.506	9	-0.713, -0.482	9.9	b	s	42/47	F		57	F	PHE:57:A	-0.516	7	-0.759, -0.365	8.7	b		123/152	F,L		57	F	PHE:57:A	-0.360	7	-0.617, -0.178	8.6	b		93/103	F,L
58	F	PHE:58:A	-0.316	7	-0.498, -0.201	8.6	e		144/150	F,Y,S,T,N,C			58	F	PHE:58:A	-0.506	9	-0.713, -0.482	9.9	e	f	42/47	F		58	F	PHE:58:A	-0.416	7	-0.667, -0.287	8.6	e		124/152	F,S,A		58	F	PHE:58:A	-0.429	7	-0.617, -0.342	8.7	e		93/103	S,A,F
59	D	ASP:59:A	0.776	4	0.241, 0.834	5.4	b		144/150	D,N,S,E,H,K,R,T,G,Q,A			59	D	ASP:59:A	-0.515	9	-0.713, -0.482	9.9	b	s	42/47	D		59	D	ASP:59:A	0.916	4	0.433, 1.243	4.3	b		124/152	K,N,D,R,Q,E,S,A,H		59	D	ASP:59:A	0.762	4	0.335, 1.155	5.3	b		93/103	K,Q,E,S,A,D,N,H
60	M	MET:60:A	-0.616	9	-0.674, -0.586	9.8	b	s	148/150	M,S,N,T,Q			60	M	MET:60:A	-0.584	9	-0.713, -0.564	9.9	b	s	42/47	M		60	M	MET:60:A	-0.683	8	-0.838, -0.561	9.7	b		133/152	M,T,Y,A,I		60	M	MET:60:A	-0.768	9	-0.852, -0.724	9.9	b	s	96/103	M,I
61	V	VAL:61:A	-0.719	9	-0.756, -0.695	9.9	b	s	149/150	V,I			61	V	VAL:61:A	-0.567	9	-0.713, -0.564	9.9	b	s	42/47	V		61	V	VAL:61:A	-0.496	7	-0.715, -0.365	8.7	b		133/152	V,I		61	V	VAL:61:A	-0.418	7	-0.617, -0.266	8.6	b		96/103	I,V
62	E	GLU:62:A	-0.359	7	-0.498, -0.296	8.7	b		149/150	E,D,G,P			62	E	GLU:62:A	-0.511	9	-0.713, -0.482	9.9	b	s	42/47	E		62	E	GLU:62:A	0.266	5	-0.106, 0.433	5.4	b		132/152	E,D,Q,L,M,S,A		62	E	GLU:62:A	0.384	4	0.037, 0.536	5.4	b		96/103	Q,E,L,M,S,A
63	Y	TYR:63:A	0.313	5	0.059, 0.485	5.4	b		149/150	Y,F,G,A,L,E,M,K,V,N,R			63	Y	TYR:63:A	0.408	5*	-0.367, 0.971	8.4	b		42/47	Y,L		63	Y	TYR:63:A	0.236	5	-0.201, 0.433	6.4	b		132/152	G,Y,L,D,I,S,F		63	Y	TYR:63:A	-0.520	8	-0.724, -0.410	9.7	b		96/103	Y,F,L
64	F	PHE:64:A	-0.600	9	-0.674, -0.545	9.8	b	s	149/150	F,N,Y			64	F	PHE:64:A	-0.506	9	-0.713, -0.482	9.9	b	s	42/47	F		64	F	PHE:64:A	-0.379	7	-0.667, -0.201	8.6	b		133/152	F,L,C,Y,N		64	F	PHE:64:A	-0.354	7	-0.617, -0.178	8.6	b		96/103	F,C,Y,N
65	F	PHE:65:A	-0.431	8	-0.545, -0.375	8.7	b		149/150	F,Y,V			65	F	PHE:65:A	-0.506	9	-0.713, -0.482	9.9	b	s	42/47	F		65	F	PHE:65:A	-0.385	7	-0.667, -0.201	8.6	b		133/152	F,W,L,Y		65	F	PHE:65:A	-0.671	9	-0.820, -0.574	9.8	b	s	96/103	F,Y
66	H	HIS:66:A	-0.568	8	-0.650, -0.498	9.8	b		149/150	H,D,E,N			66	H	HIS:66:A	-0.545	9	-0.713, -0.527	9.9	b	s	42/47	H		66	H	HIS:66:A	-0.897	9	-1.017, -0.838	9.9	b	s	133/152	D,H		66	H	HIS:66:A	-0.841	9	-0.894, -0.820	9.9	b	s	96/103	H
67	R	ARG:67:A	-0.054	5	-0.296, 0.059	7.5	e		149/150	R,K,N,H			67	R	ARG:67:A	-0.518	9	-0.713, -0.482	9.9	e	f	42/47	R		67	R	ARG:67:A	-0.149	6	-0.436, 0.002	7.5	e		132/152	R,C,K,S,A,Q		67	R	ARG:67:A	-0.101	6	-0.410, 0.037	7.5	e		96/103	K,S,A,R,Q
68	G	GLY:68:A	-0.252	6	-0.442, -0.201	8.6	b		149/150	G,A,S			68	G	GLY:68:A	0.267	5*	-0.430, 0.634	8.4	b		42/47	A,G		68	G	GLY:68:A	-0.537	7	-0.759, -0.365	8.7	b		132/152	G,A,S		68	G	GLY:68:A	-0.637	8	-0.778, -0.574	9.8	b		96/103	A,S,G
69	C	CYS:69:A	-0.364	7	-0.498, -0.296	8.7	b		149/150	C,W,A,S,V,T			69	C	CYS:69:A	-0.516	9	-0.713, -0.482	9.9	b	s	42/47	C		69	C	CYS:69:A	-0.492	7	-0.759, -0.365	8.7	b		132/152	A,C,I,T		69	C	CYS:69:A	-0.711	9	-0.837, -0.656	9.8	b	s	96/103	C,A
70	Q	GLN:70:A	0.882	4	0.485, 0.834	4.4	b		149/150	Q,I,M,V,K,R,A,G,S,T,N,C,E,D			70	Q	GLN:70:A	-0.561	9	-0.713, -0.527	9.9	b	s	42/47	Q		70	Q	GLN:70:A	-0.278	6	-0.561, -0.106	7.5	b		132/152	S,Q,G,V,L,I,R,C,K		70	Q	GLN:70:A	-0.274	6	-0.525, -0.178	8.6	b		96/103	V,L,I,Q,R,C,K
71	I	ILE:71:A	0.436	4	0.059, 0.485	5.4	b		149/150	I,V,L,A,T,M,C,Y			71	I	ILE:71:A	-0.574	9	-0.713, -0.564	9.9	b	s	42/47	I		71	I	ILE:71:A	0.434	4	0.002, 0.636	5.4	b		132/152	I,L,K,V,A,T		71	I	ILE:71:A	0.599	4	0.172, 0.797	5.4	b		96/103	K,V,L,A,T,I
72	A	ALA:72:A	0.204	5	-0.085, 0.241	5.5	b		149/150	A,V,C,I,S,L,M			72	A	ALA:72:A	0.781	4	-0.099, 1.453	6.4	b		42/47	C,A,S		72	A	ALA:72:A	-0.190	6	-0.501, 0.002	7.5	b		132/152	V,C,A,S,M,L		72	A	ALA:72:A	-0.208	6	-0.470, -0.079	7.5	b		96/103	L,M,C,A,S
73	E	GLU:73:A	-0.532	8	-0.620, -0.498	9.8	b		149/150	E,Q,K,M			73	E	GLU:73:A	-0.511	9	-0.713, -0.482	9.9	b	s	42/47	E		73	E	GLU:73:A	-0.931	9	-1.038, -0.874	9.9	b	s	132/152	E,G		73	E	GLU:73:A	-0.851	9	-0.894, -0.837	9.9	b	s	96/103	E
74	E	GLU:74:A	0.182	5	-0.085, 0.241	5.5	e		149/150	E,D,S,P,N			74	E	GLU:74:A	3.536	1	1.453, 4.598	4.1	e		42/47	E,D,N,T		74	E	GLU:74:A	0.835	4	0.266, 1.243	5.3	e		132/152	D,E,N,T,P,K,S		74	E	GLU:74:A	0.998	4	0.335, 1.155	5.3	e		96/103	P,K,E,S,N,D,T
75	S	SER:75:A	0.427	4	0.059, 0.485	5.4	e		149/150	S,K,Q,R,N,H,P,T			75	S	SER:75:A	1.512	4	0.382, 2.251	5.3	e		42/47	K,R,S		75	S	SER:75:A	1.140	3	0.636, 1.243	4.3	e		132/152	K,R,S,Q,M,E,A,D,N,T		75	S	SER:75:A	1.358	3	0.797, 1.727	4.3	e		96/103	R,Q,M,E,A,S,D,N,T,K
76	L	LEU:76:A	-0.600	9	-0.674, -0.545	9.8	b	s	149/150	L,M,F			76	L	LEU:76:A	0.259	5*	-0.430, 0.634	8.4	b		42/47	M,L		76	L	LEU:76:A	-0.701	8	-0.907, -0.561	9.7	b		132/152	L,M		76	L	LEU:76:A	-0.543	8	-0.724, -0.410	9.7	b		96/103	L,M
77	V	VAL:77:A	-0.347	7	-0.498, -0.296	8.7	b		149/150	V,L,I,R,M,A			77	V	VAL:77:A	1.890	3	0.634, 2.251	4.3	b		42/47	V,I,L		77	V	VAL:77:A	0.809	4	0.266, 1.243	5.3	b		132/152	V,I,L,N		77	V	VAL:77:A	0.956	4	0.335, 1.155	5.3	b		96/103	L,I,V,N
78	D	ASP:78:A	1.018	4	0.485, 1.405	4.3	e		149/150	D,E,C,S,H,Q,G,K,A,R			78	D	ASP:78:A	2.056	3	0.634, 2.251	4.3	e		42/47	E,D,C		78	D	ASP:78:A	0.471	4	0.002, 0.636	5.4	e		133/152	E,D,C,H,A,K,Q,R		78	D	ASP:78:A	0.362	5	-0.079, 0.536	5.4	e		96/103	E,Q,D,K,R,A,C
79	D	ASP:79:A	1.095	3	0.485, 1.405	4.3	e		149/150	D,N,E,S,A,T,G,K,Q			79	D	ASP:79:A	0.940	4	0.029, 1.453	5.4	e		42/47	D,E		79	D	ASP:79:A	0.256	5	-0.106, 0.433	5.4	e		134/152	D,E,L,F,G,Y,S,Q		79	D	ASP:79:A	0.101	5	-0.266, 0.335	6.5	e		96/103	Y,S,E,Q,D
80	M	MET:80:A	0.415	4	0.059, 0.485	5.4	b		149/150	M,L,V,I,W,F,D,Y			80	M	MET:80:A	-0.584	9	-0.713, -0.564	9.9	b	s	42/47	M		80	M	MET:80:A	-0.281	6	-0.561, -0.106	7.5	b		134/152	L,M,S,I,V		80	M	MET:80:A	-0.548	8	-0.724, -0.470	9.7	b		96/103	L,M
81	K	LYS:81:A	1.082	3	0.485, 1.405	4.3	e		149/150	K,G,R,V,A,S,P,N,Y,H,D			81	K	LYS:81:A	-0.531	9	-0.713, -0.527	9.9	e	f	42/47	K		81	K	LYS:81:A	0.529	4	0.124, 0.893	5.4	e		134/152	R,K,N,S,E,D,G,I,A		81	K	LYS:81:A	0.225	5	-0.178, 0.536	6.4	e		96/103	K,S,N,E,D,G,I,A
82	G	GLY:82:A	1.364	3	0.834, 1.405	4.3	e		149/150	G,E,T,S,N,D,A,H,P,Q,M,I,V,R,L			82	G	GLY:82:A	0.488	5*	-0.367, 0.971	8.4	e		42/47	G,S		82	G	GLY:82:A	0.462	4	-0.106, 0.893	5.4	e		88/152	T,G,S,I,K,L		82	G	GLY:82:A	0.952	4	0.335, 1.155	5.3	e		96/103	P,T,S,A,L,G
83	K	LYS:83:A	0.774	4	0.241, 0.834	5.4	e		148/150	K,R,Q,T,L,P,H,S			83	K	LYS:83:A	1.625	3	0.382, 2.251	5.3	e		42/47	R,K		83	K	LYS:83:A	0.392	4	0.002, 0.636	5.4	e		135/152	R,K,S,Q,P,V		83	K	LYS:83:A	1.520	3	0.797, 1.727	4.3	e		96/103	Q,T,L,S,N,Y,R,H,D,K,W
84	L	LEU:84:A	1.355	3	0.834, 1.405	4.3	e		150/150	L,A,M,I,G,T,V,S,E,D,K,H			84	L	LEU:84:A	4.540	1	2.251, 4.598	3.1	e		42/47	I,S,A,T,L,M,D		84	L	LEU:84:A	1.489	3	0.893, 1.789	4.3	e		135/152	E,I,S,A,T,L,M,D,Q,G,Y,N,H		84	L	LEU:84:A	1.256	3	0.536, 1.727	4.3	e		97/103	M,L,W,F,A,I,S,T,D
85	T	THR:85:A	0.826	4	0.485, 0.834	4.4	e		150/150	T,S,P,D,N,K			85	T	THR:85:A	-0.068	6*	-0.527, 0.186	9.5	e		42/47	S,T		85	T	THR:85:A	0.706	4	0.266, 0.893	5.4	e		135/152	S,T,P,C,A,L		85	T	THR:85:A	0.334	5	-0.079, 0.536	5.4	e		97/103	S,A,T,K,Q,D,E
86	R	ARG:86:A	3.077	1	1.405, 3.077	3.1	e		150/150	R,L,I,A,V,M,E,D,Q,T,P,N,S,K,H			86	R	ARG:86:A	4.366	1	2.251, 4.598	3.1	e		42/47	L,M,V,R,A		86	R	ARG:86:A	3.133	1	1.789, 3.269	3.1	e		134/152	E,A,L,M,V,R,D,K,P,N,S		86	R	ARG:86:A	3.062	1	1.727, 3.323	3.1	e		97/103	A,E,P,K,V,N,D,S,L,M,R
87	D	ASP:87:A	0.716	4	0.241, 0.834	5.4	e		150/150	D,E,R,A,Q,V,N,K			87	D	ASP:87:A	1.808	3	0.382, 2.251	5.3	e		42/47	E,D		87	D	ASP:87:A	0.093	5	-0.287, 0.266	6.5	e		134/152	E,D,V,A,K,S,G		87	D	ASP:87:A	0.079	5	-0.266, 0.335	6.5	e		97/103	A,E,D,K,S,G
88	E	GLU:88:A	0.937	4	0.485, 0.834	4.4	e		150/150	E,D,A,Q,T,R,N,V,M,H			88	E	GLU:88:A	1.923	3	0.634, 2.251	4.3	e		42/47	E,A,D		88	E	GLU:88:A	0.629	4	0.124, 0.893	5.4	e		134/152	Q,E,A,D,G,N,R,K,W,S		88	E	GLU:88:A	0.966	4	0.335, 1.155	5.3	e		97/103	G,N,R,K,Q,D,E,A,W,S
89	K	LYS:89:A	-0.279	7	-0.442, -0.201	8.6	e		150/150	K,R,Q,M			89	K	LYS:89:A	-0.531	9	-0.713, -0.527	9.9	e	f	42/47	K		89	K	LYS:89:A	-0.135	6	-0.436, 0.002	7.5	e		134/152	K,P,R,V		89	K	LYS:89:A	-0.260	6	-0.525, -0.079	8.5	e		96/103	R,K,V
90	K	LYS:90:A	1.152	3	0.485, 1.405	4.3	e		150/150	K,R,T,Q,A,M,H,F,L,V,I,S,N			90	K	LYS:90:A	0.939	4	0.029, 1.453	5.4	e		42/47	R,K		90	K	LYS:90:A	0.887	4	0.433, 1.243	4.3	e		134/152	R,K,Q,N,M,A,I,E,S		90	K	LYS:90:A	0.649	4	0.172, 0.797	5.4	e		96/103	K,M,A,I,E,Q,S,R
91	Q	GLN:91:A	1.226	3	0.485, 1.405	4.3	e		150/150	Q,K,H,N,E,A,L,S,G,R,T,I			91	Q	GLN:91:A	0.732	4	-0.099, 1.453	6.4	e		42/47	K,N,Q		91	Q	GLN:91:A	0.824	4	0.266, 1.243	5.3	e		134/152	N,K,Q,A,L,D,H,S,R,G,E		91	Q	GLN:91:A	0.656	4	0.172, 0.797	5.4	e		96/103	K,A,H,S,N,R,Q,G,E
92	K	LYS:92:A	-0.073	5	-0.296, 0.059	7.5	e		150/150	K,R,T,V,Q			92	K	LYS:92:A	0.855	4	-0.099, 1.453	6.4	e		42/47	R,K		92	K	LYS:92:A	-0.224	6	-0.501, 0.002	7.5	e		134/152	R,K,Q,W,C		92	K	LYS:92:A	-0.501	8	-0.692, -0.410	9.7	e	f	96/103	R,K
93	V	VAL:93:A	-0.617	9	-0.695, -0.586	9.8	b	s	150/150	V,A,T,I			93	V	VAL:93:A	-0.567	9	-0.713, -0.564	9.9	b	s	42/47	V		93	V	VAL:93:A	-0.700	8	-0.874, -0.616	9.8	b		133/152	V,L,G,M		93	V	VAL:93:A	-0.845	9	-0.894, -0.820	9.9	b	s	96/103	V
94	K	LYS:94:A	0.640	4	0.241, 0.834	5.4	e		150/150	K,R,Q,A,H,N,E,C,S			94	K	LYS:94:A	-0.531	9	-0.713, -0.527	9.9	e	f	42/47	K		94	K	LYS:94:A	0.630	4	0.124, 0.893	5.4	e		133/152	R,K,V,H,C,Q,E,S,T,N,A		94	K	LYS:94:A	0.355	5	-0.079, 0.536	5.4	e		96/103	Q,E,S,T,N,A,R,K
95	G	GLY:95:A	-0.633	9	-0.713, -0.586	9.8	e	f	150/150	G,A,N			95	G	GLY:95:A	-0.438	8	-0.711, -0.430	9.8	e	f	42/47	G		95	G	GLY:95:A	-0.351	7	-0.616, -0.201	8.6	e		133/152	G,T,A		95	G	GLY:95:A	-0.239	6	-0.525, -0.079	8.5	e		96/103	T,A,G
96	I	ILE:96:A	-0.595	8	-0.674, -0.545	9.8	b		150/150	I,L,Y,T,V			96	I	ILE:96:A	-0.574	9	-0.713, -0.564	9.9	b	s	42/47	I		96	I	ILE:96:A	-0.750	8	-0.907, -0.667	9.8	b		133/152	I,V,M,L		96	I	ILE:96:A	-0.665	8	-0.800, -0.574	9.8	b		96/103	I,M,L
97	L	LEU:97:A	-0.641	9	-0.713, -0.586	9.8	b	s	150/150	L,M,I,F			97	L	LEU:97:A	-0.502	9	-0.713, -0.482	9.9	b	s	42/47	L		97	L	LEU:97:A	-0.700	8	-0.907, -0.561	9.7	b		134/152	L,M,I		97	L	LEU:97:A	-0.677	9	-0.820, -0.617	9.8	b	s	96/103	I,L
98	M	MET:98:A	1.052	3	0.485, 1.405	4.3	e		150/150	M,Q,N,L,A,I,K,T,G,R,S,E,H			98	M	MET:98:A	-0.584	9	-0.713, -0.564	9.9	e	f	42/47	M		98	M	MET:98:A	0.759	4	0.266, 0.893	5.4	e		134/152	R,M,G,H,Q,K,D,N,L		98	M	MET:98:A	0.501	4	0.037, 0.797	5.4	e		96/103	H,Q,R,K,D,N,L,M
99	L	LEU:99:A	0.375	4	0.059, 0.485	5.4	e		150/150	L,G,S,Y,M,V,I,H,F,T,C			99	L	LEU:99:A	-0.502	9	-0.713, -0.482	9.9	e	f	42/47	L		99	L	LEU:99:A	0.294	5	-0.106, 0.636	5.4	e		134/152	I,L,V,M,R,F		99	L	LEU:99:A	0.378	4	-0.079, 0.536	5.4	e		96/103	L,I,M,R,F
100	M	MET:100:A	-0.343	7	-0.498, -0.296	8.7	b		150/150	M,I,L,V			100	M	MET:100:A	-0.584	9	-0.713, -0.564	9.9	b	s	42/47	M		100	M	MET:100:A	0.113	5	-0.201, 0.266	6.5	b		135/152	I,M,T,L,V		100	M	MET:100:A	0.171	5	-0.178, 0.335	6.5	b		97/103	I,V,M,L
101	Q	GLN:101:A	-0.411	7	-0.545, -0.375	8.7	e		150/150	Q,E,K,G,R			101	Q	GLN:101:A	-0.561	9	-0.713, -0.527	9.9	e	f	42/47	Q		101	Q	GLN:101:A	0.009	5	-0.365, 0.266	7.5	e		136/152	K,Q,D,C,E,S,G,A		101	Q	GLN:101:A	0.016	5	-0.342, 0.172	7.5	e		97/103	C,E,S,G,A,Q
102	P	PRO:102:A	0.077	5	-0.201, 0.241	6.5	e		150/150	P,N,G,Q,H,E,K,T			102	P	PRO:102:A	-0.409	8	-0.711, -0.367	9.8	e	f	42/47	P		102	P	PRO:102:A	0.365	4	0.002, 0.636	5.4	e		136/152	P,G,N,S,C,I,V,A,R,Y		102	P	PRO:102:A	0.513	4	0.037, 0.797	5.4	e		97/103	G,N,S,C,I,V,A,R,Y,P
103	C	CYS:103:A	-0.651	9	-0.713, -0.620	9.9	e	f	150/150	C,V,P			103	C	CYS:103:A	-0.516	9	-0.713, -0.482	9.9	e	f	42/47	C		103	C	CYS:103:A	-0.231	6	-0.561, 0.002	7.5	e		136/152	C,T,E,A,N,V		103	C	CYS:103:A	-0.238	6	-0.525, -0.079	8.5	e		97/103	E,A,N,T,V,C
104	D	ASP:104:A	-0.390	7	-0.498, -0.296	8.7	e		150/150	D,H,N,Q,S,A			104	D	ASP:104:A	-0.515	9	-0.713, -0.482	9.9	e	f	42/47	D		104	D	ASP:104:A	-0.091	5	-0.365, 0.124	7.5	e		136/152	N,D,A,S,T,C		104	D	ASP:104:A	0.000	5	-0.266, 0.172	6.5	e		97/103	A,S,T,N,C,D
105	H	HIS:105:A	-0.200	6	-0.375, -0.085	7.5	e		150/150	H,Y,T,S,Q,A,C,N,K			105	H	HIS:105:A	0.019	5*	-0.482, 0.382	9.5	e		44/47	H,E		105	H	HIS:105:A	0.113	5	-0.201, 0.266	6.5	e		137/152	H,E,T,Q,N,S,A,C		105	H	HIS:105:A	0.028	5	-0.266, 0.172	6.5	e		98/103	N,S,T,A,C,H,E
106	I	ILE:106:A	-0.156	6	-0.296, -0.085	7.5	e		150/150	I,V,L,M,A,T			106	I	ILE:106:A	-0.053	5*	-0.527, 0.186	9.5	e		44/47	I,L		106	I	ILE:106:A	0.335	5	-0.106, 0.636	5.4	e		138/152	V,I,L,A,C,T,S,M		106	I	ILE:106:A	0.147	5	-0.178, 0.335	6.5	e		98/103	T,L,S,A,C,M,I
107	I	ILE:107:A	0.263	5	-0.085, 0.485	5.4	e		150/150	I,L,F,R,V,M,C			107	I	ILE:107:A	-0.053	5*	-0.527, 0.186	9.5	e		44/47	I,L		107	I	ILE:107:A	0.014	5	-0.365, 0.266	7.5	e		138/152	L,I,H,V		107	I	ILE:107:A	0.056	5	-0.266, 0.335	6.5	e		98/103	I,L,V
108	E	GLU:108:A	-0.085	5	-0.296, 0.059	7.5	e		150/150	E,Q,S,A,N,K,D			108	E	GLU:108:A	0.936	4	0.029, 1.453	5.4	e		44/47	E,G,S		108	E	GLU:108:A	-0.410	7	-0.616, -0.287	8.6	e		138/152	S,E,G,P,N,Q		108	E	GLU:108:A	-0.575	8	-0.724, -0.470	9.7	e	f	98/103	E,Q,G,S
109	I	ILE:109:A	0.616	4	0.241, 0.834	5.4	b		150/150	I,T,V,M,L,F			109	I	ILE:109:A	-0.053	5*	-0.527, 0.186	9.5	b		44/47	I,L		109	I	ILE:109:A	-0.022	5	-0.365, 0.124	7.5	b		138/152	L,V,I,P,F		109	I	ILE:109:A	-0.419	7	-0.617, -0.266	8.6	b		98/103	V,I,F,L
110	A	ALA:110:A	0.831	4	0.485, 0.834	4.4	e		150/150	A,N,S,T,Q,C,V,G,R,H			110	A	ALA:110:A	0.673	4	-0.099, 0.971	6.4	e		43/47	A,F,S		110	A	ALA:110:A	1.097	3	0.636, 1.243	4.3	e		137/152	S,C,T,A,F,P,R,Q,N		110	A	ALA:110:A	0.691	4	0.172, 0.797	5.4	e		97/103	R,Q,T,N,S,A,F
111	F	PHE:111:A	-0.724	9	-0.762, -0.695	9.9	b	s	150/150	F,Y			111	F	PHE:111:A	0.199	5*	-0.430, 0.634	8.4	b		43/47	F,L		111	F	PHE:111:A	-0.552	7	-0.800, -0.365	8.7	b		137/152	F,L,P		111	F	PHE:111:A	-0.672	9	-0.820, -0.574	9.8	b	s	97/103	F,L
112	P	PRO:112:A	-0.753	9	-0.775, -0.749	9.9	e	f	150/150	P			112	P	PRO:112:A	0.643	4	-0.293, 0.971	7.4	e		43/47	P,A		112	P	PRO:112:A	-0.339	6	-0.667, -0.106	8.5	e		137/152	P,A,S		112	P	PRO:112:A	-0.476	7	-0.692, -0.342	9.7	e		97/103	P,S,A
113	L	LEU:113:A	0.042	5	-0.201, 0.059	6.5	b		150/150	L,V,I			113	L	LEU:113:A	-0.511	9	-0.713, -0.482	9.9	b	s	43/47	L		113	L	LEU:113:A	-0.127	6	-0.436, 0.124	7.5	b		136/152	I,L,Q,V,F		113	L	LEU:113:A	-0.233	6	-0.470, -0.079	7.5	b		97/103	V,F,I,L
114	R	ARG:114:A	0.333	5	0.059, 0.485	5.4	e		150/150	R,K,Q,L			114	R	ARG:114:A	-0.526	9	-0.713, -0.482	9.9	e	f	43/47	R		114	R	ARG:114:A	1.181	3	0.636, 1.789	4.3	e		136/152	R,K,Q,M,I,V,L,A,Y,H		114	R	ARG:114:A	1.038	4	0.536, 1.155	4.3	e		97/103	M,R,I,V,L,A,K,Y,H
115	R	ARG:115:A	-0.467	8	-0.586, -0.375	8.7	e	f	150/150	R,K,L			115	R	ARG:115:A	0.259	5*	-0.430, 0.634	8.4	e		43/47	R,F		115	R	ARG:115:A	0.150	5	-0.201, 0.433	6.4	e		136/152	R,F,L,H,K,N		115	R	ARG:115:A	-0.123	6	-0.410, 0.037	7.5	e		97/103	R,K,N,F
116	D	ASP:116:A	-0.764	9	-0.776, -0.762	9.9	e	f	150/150	D			116	D	ASP:116:A	0.210	5*	-0.430, 0.634	8.4	e		43/47	D,T		116	D	ASP:116:A	1.183	3	0.636, 1.789	4.3	e		136/152	D,T,Y,E,N,S,G,Q,K		116	D	ASP:116:A	1.095	4	0.536, 1.727	4.3	e		97/103	D,S,G,E,Q,K,N,T
117	A	ALA:117:A	0.204	5	-0.085, 0.241	5.5	e		150/150	A,N,T,S,D,G,C,H			117	A	ALA:117:A	0.415	5	-0.205, 0.971	7.4	e		43/47	S,A		117	A	ALA:117:A	0.512	4	0.124, 0.893	5.4	e		136/152	D,S,A,G,N,K		117	A	ALA:117:A	0.525	4	0.037, 0.797	5.4	e		97/103	N,S,D,K,A
118	G	GLY:118:A	-0.757	9	-0.775, -0.756	9.9	e	f	150/150	G			118	G	GLY:118:A	0.571	4*	-0.367, 0.971	8.4	e		43/47	G,K		118	G	GLY:118:A	-0.349	7	-0.667, -0.106	8.5	e		134/152	G,K,P,S		118	G	GLY:118:A	-0.385	7	-0.656, -0.178	8.6	e		95/103	G,S,K
119	N	ASN:119:A	1.332	3	0.834, 1.405	4.3	e		150/150	N,V,D,C,E,A,T,Q,R,S,K			119	N	ASN:119:A	0.785	4	-0.099, 1.453	6.4	e		43/47	D,E,N		119	N	ASN:119:A	2.048	2	1.243, 3.269	3.1	e		136/152	S,D,E,N,C,Q,V,R,H,T,A		119	N	ASN:119:A	2.788	1	1.155, 3.323	3.1	e		97/103	Q,V,R,E,S,H,N,T,A,D
120	Y	TYR:120:A	0.201	5	-0.085, 0.241	5.5	e		150/150	Y,W,F,I,L,V			120	Y	TYR:120:A	0.276	5*	-0.430, 0.634	8.4	e		43/47	Y,F		120	Y	TYR:120:A	-0.369	7	-0.667, -0.201	8.6	e		135/152	W,Y,F,R,X,I		120	Y	TYR:120:A	-0.531	8	-0.724, -0.410	9.7	e	f	97/103	Y,I,F
121	E	GLU:121:A	-0.347	7	-0.498, -0.296	8.7	e		150/150	E,V,T,Q,C,H,D			121	E	GLU:121:A	-0.511	9	-0.713, -0.482	9.9	e	f	42/47	E		121	E	GLU:121:A	-0.935	9	-1.038, -0.874	9.9	e	f	134/152	E,K		121	E	GLU:121:A	-0.851	9	-0.894, -0.837	9.9	e	f	96/103	E
122	M	MET:122:A	0.071	5	-0.201, 0.241	6.5	e		150/150	M,I,N,V,L,T			122	M	MET:122:A	-0.075	6*	-0.527, 0.186	9.5	e		42/47	M,L		122	M	MET:122:A	-0.119	6	-0.436, 0.124	7.5	e		134/152	V,M,L,I		122	M	MET:122:A	-0.034	5	-0.342, 0.172	7.5	e		96/103	I,M,L,V
123	I	ILE:123:A	-0.604	9	-0.674, -0.545	9.8	b	s	150/150	I,V			123	I	ILE:123:A	-0.574	9	-0.713, -0.564	9.9	b	s	42/47	I		123	I	ILE:123:A	-0.659	8	-0.838, -0.561	9.7	b		135/152	I,L,V		123	I	ILE:123:A	-0.454	7	-0.656, -0.342	8.7	b		96/103	L,V,I
124	T	THR:124:A	0.391	4	0.059, 0.485	5.4	e		150/150	T,Q,L,K,R,H,V,E,N,S,Y,D			124	T	THR:124:A	-0.559	9	-0.713, -0.527	9.9	e	f	42/47	T		124	T	THR:124:A	-0.348	7	-0.616, -0.201	8.6	e		135/152	E,T,P,H,S,N		124	T	THR:124:A	-0.461	7	-0.656, -0.342	8.7	e		96/103	T,S,N
125	G	GLY:125:A	-0.022	5	-0.296, 0.059	7.5	b		150/150	G,C,A			125	G	GLY:125:A	-0.438	8	-0.711, -0.430	9.8	b		42/47	G		125	G	GLY:125:A	-0.578	8	-0.838, -0.436	9.7	b		135/152	G,A		125	G	GLY:125:A	-0.404	7	-0.656, -0.266	8.6	b		96/103	G,A
126	Y	TYR:126:A	-0.095	6	-0.296, 0.059	7.5	b		150/150	Y,F,W,V,H			126	Y	TYR:126:A	-0.489	9	-0.711, -0.482	9.9	b	s	42/47	Y		126	Y	TYR:126:A	-0.407	7	-0.667, -0.201	8.6	b		135/152	Y,H,R,C,F		126	Y	TYR:126:A	-0.673	9	-0.820, -0.574	9.8	b	s	96/103	Y,F
127	R	ARG:127:A	-0.765	9	-0.776, -0.762	9.9	b	s	150/150	R			127	R	ARG:127:A	-0.518	9	-0.713, -0.482	9.9	b	s	42/47	R		127	R	ARG:127:A	-1.010	9	-1.085, -0.993	9.9	b	s	135/152	R		127	R	ARG:127:A	-0.840	9	-0.894, -0.820	9.9	b	s	96/103	R
128	A	ALA:128:A	-0.618	9	-0.695, -0.586	9.8	b	s	150/150	A,S			128	A	ALA:128:A	0.022	5*	-0.482, 0.382	9.5	b		43/47	A,V		128	A	ALA:128:A	-0.346	7	-0.616, -0.201	8.6	b		136/152	A,V,T,S		128	A	ALA:128:A	-0.343	7	-0.574, -0.178	8.6	b		97/103	S,A,V
129	Q	GLN:129:A	-0.768	9	-0.776, -0.767	9.9	b	s	150/150	Q			129	Q	GLN:129:A	-0.034	5*	-0.527, 0.186	9.5	b		43/47	Q,A		129	Q	GLN:129:A	-0.731	8	-0.907, -0.616	9.8	b		136/152	Q,A,T,H		129	Q	GLN:129:A	-0.631	8	-0.778, -0.525	9.8	b		97/103	H,Q,A
130	H	HIS:130:A	-0.767	9	-0.776, -0.767	9.9	b	s	150/150	H			130	H	HIS:130:A	0.068	5*	-0.482, 0.382	9.5	b		43/47	H,E		130	H	HIS:130:A	-0.791	8	-0.967, -0.715	9.8	b		136/152	H,E		130	H	HIS:130:A	-0.729	9	-0.837, -0.656	9.8	b	s	97/103	H,E
131	S	SER:131:A	-0.723	9	-0.756, -0.713	9.9	b	s	150/150	S,C			131	S	SER:131:A	0.005	5*	-0.482, 0.186	9.5	b		43/47	C,S		131	S	SER:131:A	-0.085	5	-0.436, 0.124	7.5	b		136/152	S,C,P,T,V,I,M		131	S	SER:131:A	0.117	5	-0.266, 0.335	6.5	b		97/103	C,T,V,S,I,M
132	T	THR:132:A	-0.181	6	-0.375, -0.085	7.5	e		149/150	T,S,A,L,Q,G,H,N			132	T	THR:132:A	-0.043	5*	-0.527, 0.186	9.5	e		43/47	T,S		132	T	THR:132:A	0.196	5	-0.201, 0.433	6.4	e		137/152	Q,T,S,A,M,V,L,R,K		132	T	THR:132:A	0.187	5	-0.178, 0.335	6.5	e		97/103	V,L,R,K,T,S
133	H	HIS:133:A	-0.767	9	-0.776, -0.767	9.9	b	s	149/150	H			133	H	HIS:133:A	0.055	5*	-0.482, 0.382	9.5	b		43/47	H,F		133	H	HIS:133:A	-0.310	6	-0.561, -0.106	7.5	b		137/152	H,F,Q,N		133	H	HIS:133:A	-0.206	6	-0.470, -0.079	7.5	b		97/103	H,N,Q,F
134	K	LYS:134:A	-0.617	9	-0.695, -0.586	9.8	e	f	149/150	K,R,C			134	K	LYS:134:A	0.951	4	0.029, 1.453	5.4	e		43/47	R,I,K		134	K	LYS:134:A	-0.180	6	-0.501, 0.002	7.5	e		136/152	R,I,K,D,C,H		134	K	LYS:134:A	-0.497	8	-0.692, -0.410	9.7	e	f	97/103	R,K,I
135	T	THR:135:A	-0.176	6	-0.375, -0.085	7.5	e		149/150	T,I,Q,V,L,M,A,S			135	T	THR:135:A	1.952	3	0.634, 2.251	4.3	e		43/47	T,S,V,I		135	T	THR:135:A	0.472	4	0.002, 0.636	5.4	e		137/152	T,S,V,I,M,Y,L		135	T	THR:135:A	-0.100	6	-0.410, 0.037	7.5	e		97/103	L,T,S,V,I
136	P	PRO:136:A	-0.753	9	-0.775, -0.749	9.9	b	s	149/150	P			136	P	PRO:136:A	0.681	4	-0.293, 0.971	7.4	b		43/47	P,K		136	P	PRO:136:A	-0.642	8	-0.874, -0.501	9.7	b		137/152	P,K,D		136	P	PRO:136:A	-0.637	8	-0.820, -0.525	9.8	b		97/103	P,K
137	T	THR:137:A	-0.314	7	-0.442, -0.201	8.6	b		149/150	T,C,A,S,M			137	T	THR:137:A	-0.043	5*	-0.527, 0.186	9.5	b		43/47	T,S		137	T	THR:137:A	-0.016	5	-0.365, 0.266	7.5	b		136/152	C,T,S,F,V,L,A		137	T	THR:137:A	-0.161	6	-0.470, 0.037	7.5	b		96/103	V,L,A,T,S
138	K	LYS:138:A	-0.766	9	-0.776, -0.762	9.9	b	s	149/150	K			138	K	LYS:138:A	0.090	5*	-0.482, 0.382	9.5	b		43/47	K,Q		138	K	LYS:138:A	-0.633	8	-0.838, -0.501	9.7	b		136/152	K,Q,N,S,R		138	K	LYS:138:A	-0.745	9	-0.852, -0.692	9.9	b	s	96/103	K,Q
139	G	GLY:139:A	-0.757	9	-0.775, -0.756	9.9	b	s	149/150	G			139	G	GLY:139:A	0.602	4	-0.293, 0.971	7.4	b		43/47	G,P		139	G	GLY:139:A	-0.755	8	-0.967, -0.616	9.8	b		136/152	G,P		139	G	GLY:139:A	-0.581	8	-0.800, -0.470	9.7	b		96/103	G,P
140	G	GLY:140:A	-0.757	9	-0.775, -0.756	9.9	b	s	148/150	G			140	G	GLY:140:A	1.555	3	0.186, 2.251	5.3	b		44/47	G,C		140	G	GLY:140:A	0.063	5	-0.365, 0.266	7.5	b		136/152	G,C,V,D		140	G	GLY:140:A	-0.374	7	-0.656, -0.178	8.6	b		97/103	G,C
141	I	ILE:141:A	-0.675	9	-0.727, -0.650	9.9	b	s	149/150	I,M,V			141	I	ILE:141:A	-0.582	9	-0.713, -0.564	9.9	b	s	44/47	I		141	I	ILE:141:A	-0.845	9	-0.993, -0.759	9.8	b	s	136/152	I,L,V		141	I	ILE:141:A	-0.850	9	-0.894, -0.837	9.9	b	s	97/103	I
142	R	ARG:142:A	-0.765	9	-0.776, -0.762	9.9	b	s	149/150	R			142	R	ARG:142:A	-0.527	9	-0.713, -0.527	9.9	b	s	44/47	R		142	R	ARG:142:A	-0.671	8	-0.874, -0.561	9.7	b		136/152	R,C,H		142	R	ARG:142:A	-0.839	9	-0.894, -0.820	9.9	b	s	97/103	R
143	F	PHE:143:A	0.252	5	-0.085, 0.485	5.4	b		149/150	F,Y,C			143	F	PHE:143:A	-0.516	9	-0.713, -0.482	9.9	b	s	44/47	F		143	F	PHE:143:A	1.211	3	0.636, 1.789	4.3	b		136/152	Y,F,H,D		143	F	PHE:143:A	0.837	4	0.335, 1.155	5.3	b		97/103	Y,F
144	S	SER:144:A	-0.699	9	-0.739, -0.674	9.9	e	f	149/150	S,A			144	S	SER:144:A	-0.583	9	-0.713, -0.564	9.9	e	f	44/47	S		144	S	SER:144:A	-0.478	7	-0.715, -0.365	8.7	e		136/152	S,N,A,G		144	S	SER:144:A	-0.350	7	-0.574, -0.178	8.6	e		97/103	S,A,G
145	L	LEU:145:A	1.397	3	0.834, 1.405	4.3	e		149/150	L,M,E,D,T,S,N,P,K,Q			145	L	LEU:145:A	0.188	5*	-0.430, 0.634	8.4	e		45/47	L,M		145	L	LEU:145:A	0.531	4	0.124, 0.893	5.4	e		137/152	T,S,L,M,A,I,Q		145	L	LEU:145:A	0.321	5	-0.079, 0.536	5.4	e		98/103	M,L,I,S,Q,T
146	D	ASP:146:A	-0.002	5	-0.201, 0.059	6.5	e		150/150	D,E,A,H,G,S,L			146	D	ASP:146:A	-0.524	9	-0.713, -0.482	9.9	e	f	45/47	D		146	D	ASP:146:A	-0.901	9	-1.038, -0.838	9.9	e	f	136/152	D,X,N		146	D	ASP:146:A	-0.839	9	-0.894, -0.820	9.9	e	f	98/103	D
147	V	VAL:147:A	-0.768	9	-0.776, -0.767	9.9	b	s	150/150	V			147	V	VAL:147:A	-0.576	9	-0.713, -0.564	9.9	b	s	45/47	V		147	V	VAL:147:A	-0.608	8	-0.800, -0.501	8.7	b		138/152	V,L,E,G,T		147	V	VAL:147:A	-0.740	9	-0.852, -0.692	9.9	b	s	99/103	T,V
148	S	SER:148:A	0.400	4	0.059, 0.485	5.4	e		150/150	S,T,C,N,D			148	S	SER:148:A	-0.108	6*	-0.527, 0.186	9.5	e		45/47	S,C		148	S	SER:148:A	0.369	4	0.002, 0.636	5.4	e		138/152	S,C,T,V,D,N,E		148	S	SER:148:A	0.518	4	0.037, 0.797	5.4	e		99/103	V,T,C,D,S,N,E
149	R	ARG:149:A	0.606	4	0.241, 0.834	5.4	e		150/150	R,I,V,A,T,L,K,E,M,D,S			149	R	ARG:149:A	-0.527	9	-0.713, -0.527	9.9	e	f	45/47	R		149	R	ARG:149:A	0.567	4	0.124, 0.893	5.4	e		138/152	V,R,A,Q,K,E,S,D,G		149	R	ARG:149:A	0.578	4	0.172, 0.797	5.4	e		99/103	R,Q,K,A,E,S,D,G
150	D	ASP:150:A	-0.652	9	-0.713, -0.620	9.9	e	f	150/150	D,N,H			150	D	ASP:150:A	-0.524	9	-0.713, -0.482	9.9	e	f	45/47	D		150	D	ASP:150:A	0.282	5	-0.106, 0.433	5.4	e		138/152	D,T,N,H,S,A		150	D	ASP:150:A	0.476	4	0.037, 0.797	5.4	e		99/103	T,D,N,H,S,A
151	E	GLU:151:A	-0.764	9	-0.776, -0.762	9.9	e	f	150/150	E			151	E	GLU:151:A	-0.521	9	-0.713, -0.482	9.9	e	f	45/47	E		151	E	GLU:151:A	-0.937	9	-1.038, -0.874	9.9	e	f	138/152	E,T		151	E	GLU:151:A	-0.758	9	-0.852, -0.692	9.9	e	f	99/103	T,E
152	V	VAL:152:A	-0.744	9	-0.767, -0.727	9.9	b	s	150/150	V,I			152	V	VAL:152:A	-0.576	9	-0.713, -0.564	9.9	b	s	45/47	V		152	V	VAL:152:A	-0.819	9	-0.967, -0.715	9.8	b	s	138/152	V,I		152	V	VAL:152:A	-0.742	9	-0.852, -0.692	9.9	b	s	99/103	V,I
153	K	LYS:153:A	-0.495	8	-0.586, -0.442	8.8	e	f	150/150	K,T,M,R,Q			153	K	LYS:153:A	-0.540	9	-0.713, -0.527	9.9	e	f	45/47	K		153	K	LYS:153:A	-0.526	7	-0.759, -0.365	8.7	e		138/152	K,Q,E,R,M		153	K	LYS:153:A	-0.432	7	-0.617, -0.342	8.7	e		99/103	E,K,R,M
154	A	ALA:154:A	-0.767	9	-0.776, -0.767	9.9	b	s	150/150	A			154	A	ALA:154:A	-0.553	9	-0.713, -0.527	9.9	b	s	45/47	A		154	A	ALA:154:A	-0.913	9	-1.038, -0.838	9.9	b	s	138/152	A,G		154	A	ALA:154:A	-0.733	9	-0.852, -0.656	9.8	b	s	99/103	A,G
155	L	LEU:155:A	-0.763	9	-0.776, -0.762	9.9	b	s	150/150	L			155	L	LEU:155:A	-0.513	9	-0.713, -0.482	9.9	b	s	45/47	L		155	L	LEU:155:A	-0.844	9	-1.017, -0.759	9.8	b	s	138/152	L,I		155	L	LEU:155:A	-0.673	9	-0.820, -0.574	9.8	b	s	99/103	I,L
156	S	SER:156:A	-0.395	7	-0.498, -0.296	8.7	b		150/150	S,A			156	S	SER:156:A	-0.583	9	-0.713, -0.564	9.9	b	s	45/47	S		156	S	SER:156:A	-0.650	8	-0.838, -0.561	9.7	b		138/152	A,S,V,G		156	S	SER:156:A	-0.658	8	-0.800, -0.574	9.8	b		99/103	S,A,G
157	A	ALA:157:A	-0.598	8	-0.674, -0.545	9.8	b		150/150	A,S,Q			157	A	ALA:157:A	-0.553	9	-0.713, -0.527	9.9	b	s	45/47	A		157	A	ALA:157:A	-0.056	5	-0.365, 0.124	7.5	b		138/152	S,A,T,V,Y		157	A	ALA:157:A	-0.029	5	-0.342, 0.172	7.5	b		99/103	V,S,A,Y,T
158	L	LEU:158:A	-0.763	9	-0.776, -0.762	9.9	b	s	150/150	L			158	L	LEU:158:A	-0.513	9	-0.713, -0.482	9.9	b	s	45/47	L		158	L	LEU:158:A	-0.627	8	-0.838, -0.501	9.7	b		138/152	L,F,I		158	L	LEU:158:A	-0.454	7	-0.656, -0.342	8.7	b		99/103	F,L,I
159	M	MET:159:A	-0.769	9	-0.776, -0.767	9.9	e	f	150/150	M			159	M	MET:159:A	-0.591	9	-0.713, -0.564	9.9	e	f	46/47	M		159	M	MET:159:A	-0.865	9	-0.993, -0.800	9.8	e	f	144/152	M,T,I		159	M	MET:159:A	-0.768	9	-0.852, -0.724	9.9	e	f	101/103	I,M
160	T	THR:160:A	-0.742	9	-0.767, -0.727	9.9	b	s	150/150	T,S			160	T	THR:160:A	-0.568	9	-0.713, -0.564	9.9	b	s	46/47	T		160	T	THR:160:A	-0.640	8	-0.838, -0.501	9.7	b		143/152	T,A,S		160	T	THR:160:A	-0.549	8	-0.724, -0.470	9.7	b		100/103	T,A,S
161	F	PHE:161:A	-0.329	7	-0.498, -0.201	8.6	b		150/150	F,Y,W,C			161	F	PHE:161:A	-0.516	9	-0.713, -0.482	9.9	b	s	46/47	F		161	F	PHE:161:A	-0.543	7	-0.800, -0.365	8.7	b		143/152	Y,F,C		161	F	PHE:161:A	-0.668	9	-0.820, -0.574	9.8	b	s	100/103	F,Y
162	K	LYS:162:A	-0.766	9	-0.776, -0.762	9.9	b	s	150/150	K			162	K	LYS:162:A	-0.540	9	-0.713, -0.527	9.9	b	s	46/47	K		162	K	LYS:162:A	-1.019	9	-1.085, -0.993	9.9	b	s	143/152	K		162	K	LYS:162:A	-0.846	9	-0.894, -0.837	9.9	b	s	100/103	K
163	C	CYS:163:A	-0.764	9	-0.776, -0.762	9.9	b	s	150/150	C			163	C	CYS:163:A	-0.526	9	-0.713, -0.482	9.9	b	s	46/47	C		163	C	CYS:163:A	-0.374	7	-0.715, -0.201	8.6	b		143/152	C,Y,S,T		163	C	CYS:163:A	-0.597	8	-0.800, -0.470	9.7	b		100/103	C,T
164	A	ALA:164:A	-0.647	9	-0.713, -0.620	9.9	b	s	150/150	A,S			164	A	ALA:164:A	-0.553	9	-0.713, -0.527	9.9	b	s	46/47	A		164	A	ALA:164:A	-0.725	8	-0.907, -0.616	9.8	b		143/152	A,V,S		164	A	ALA:164:A	-0.642	8	-0.778, -0.574	9.8	b		100/103	S,A
165	C	CYS:165:A	-0.419	7	-0.545, -0.375	8.7	b		150/150	C,V,I,T,A			165	C	CYS:165:A	-0.526	9	-0.713, -0.482	9.9	b	s	46/47	C		165	C	CYS:165:A	-0.300	6	-0.616, -0.106	8.5	b		143/152	V,C,M,S,R		165	C	CYS:165:A	-0.374	7	-0.656, -0.178	8.6	b		100/103	C,S,R
166	V	VAL:166:A	-0.768	9	-0.776, -0.767	9.9	b	s	150/150	V			166	V	VAL:166:A	-0.576	9	-0.713, -0.564	9.9	b	s	46/47	V		166	V	VAL:166:A	-0.916	9	-1.038, -0.838	9.9	b	s	143/152	V,G		166	V	VAL:166:A	-0.739	9	-0.852, -0.692	9.9	b	s	100/103	V,G
167	D	ASP:167:A	-0.653	9	-0.713, -0.620	9.9	e	f	150/150	D,N			167	D	ASP:167:A	-0.524	9	-0.713, -0.482	9.9	e	f	46/47	D		167	D	ASP:167:A	-0.674	8	-0.838, -0.561	9.7	e	f	143/152	D,H,N,S		167	D	ASP:167:A	-0.508	8	-0.692, -0.410	9.7	e	f	100/103	H,N,S,D
168	V	VAL:168:A	-0.768	9	-0.776, -0.767	9.9	b	s	150/150	V			168	V	VAL:168:A	-0.576	9	-0.713, -0.564	9.9	b	s	46/47	V		168	V	VAL:168:A	-0.216	6	-0.501, 0.002	7.5	b		143/152	V,M,L,I,A		168	V	VAL:168:A	-0.098	6	-0.410, 0.037	7.5	b		100/103	V,L,I,A
169	P	PRO:169:A	-0.753	9	-0.775, -0.749	9.9	e	f	150/150	P			169	P	PRO:169:A	-0.420	8	-0.711, -0.367	9.8	e	f	46/47	P		169	P	PRO:169:A	-0.810	9	-0.993, -0.715	9.8	e	f	145/152	P,L		169	P	PRO:169:A	-0.809	9	-0.894, -0.778	9.9	e	f	100/103	P
170	F	PHE:170:A	-0.764	9	-0.776, -0.762	9.9	b	s	150/150	F			170	F	PHE:170:A	-0.516	9	-0.713, -0.482	9.9	b	s	46/47	F		170	F	PHE:170:A	-0.274	6	-0.561, -0.106	7.5	b		145/152	F,L,V,Y		170	F	PHE:170:A	-0.363	7	-0.617, -0.178	8.6	b		100/103	F,Y
171	G	GLY:171:A	-0.757	9	-0.775, -0.756	9.9	b	s	150/150	G			171	G	GLY:171:A	-0.449	8	-0.711, -0.430	9.8	b		46/47	G		171	G	GLY:171:A	-0.759	8	-0.967, -0.616	9.8	b		145/152	G,W		171	G	GLY:171:A	-0.793	9	-0.890, -0.752	9.9	b	s	100/103	G
172	G	GLY:172:A	-0.757	9	-0.775, -0.756	9.9	b	s	150/150	G			172	G	GLY:172:A	-0.449	8	-0.711, -0.430	9.8	b		46/47	G		172	G	GLY:172:A	-0.348	7	-0.667, -0.106	8.5	b		145/152	G,H,A,C		172	G	GLY:172:A	-0.793	9	-0.890, -0.752	9.9	b	s	100/103	G
173	A	ALA:173:A	-0.399	7	-0.545, -0.296	8.7	b		150/150	A,G			173	A	ALA:173:A	-0.553	9	-0.713, -0.527	9.9	b	s	46/47	A		173	A	ALA:173:A	-0.753	8	-0.907, -0.667	9.8	b		145/152	A,R,S		173	A	ALA:173:A	-0.662	8	-0.800, -0.574	9.8	b		100/103	A,S
174	K	LYS:174:A	-0.766	9	-0.776, -0.762	9.9	b	s	150/150	K			174	K	LYS:174:A	-0.540	9	-0.713, -0.527	9.9	b	s	46/47	K		174	K	LYS:174:A	-1.021	9	-1.085, -0.993	9.9	b	s	145/152	K		174	K	LYS:174:A	-0.846	9	-0.894, -0.837	9.9	b	s	100/103	K
175	A	ALA:175:A	-0.706	9	-0.749, -0.674	9.9	b	s	150/150	A,G			175	A	ALA:175:A	-0.553	9	-0.713, -0.527	9.9	b	s	46/47	A		175	A	ALA:175:A	-0.554	7	-0.800, -0.436	8.7	b		145/152	A,G,R		175	A	ALA:175:A	-0.625	8	-0.800, -0.525	9.8	b		100/103	G,A
176	G	GLY:176:A	-0.694	9	-0.756, -0.674	9.9	b	s	150/150	G,A			176	G	GLY:176:A	-0.449	8	-0.711, -0.430	9.8	b		46/47	G		176	G	GLY:176:A	-0.164	6	-0.561, 0.124	7.5	b		145/152	G,A,K,S,D		176	G	GLY:176:A	-0.793	9	-0.890, -0.752	9.9	b	s	100/103	G
177	L	LEU:177:A	0.262	5	-0.085, 0.485	5.4	b		150/150	L,V,I			177	L	LEU:177:A	0.722	4	-0.099, 0.971	6.4	b		46/47	V,L,I		177	L	LEU:177:A	0.300	5	-0.106, 0.636	5.4	b		145/152	V,L,I,F		177	L	LEU:177:A	0.325	5	-0.079, 0.536	5.4	b		100/103	I,V,L
178	K	LYS:178:A	-0.208	6	-0.375, -0.085	7.5	e		150/150	K,R,C,Q,I,A			178	K	LYS:178:A	-0.540	9	-0.713, -0.527	9.9	e	f	46/47	K		178	K	LYS:178:A	-0.475	7	-0.715, -0.287	8.6	e		145/152	K,T,I,R,C		178	K	LYS:178:A	-0.352	7	-0.574, -0.178	8.6	e		100/103	K,I,R,C
179	I	ILE:179:A	-0.650	9	-0.713, -0.620	9.9	b	s	150/150	I,L,V			179	I	ILE:179:A	-0.582	9	-0.713, -0.564	9.9	b	s	46/47	I		179	I	ILE:179:A	-0.670	8	-0.838, -0.561	9.7	b		145/152	I,V,L,M		179	I	ILE:179:A	-0.657	8	-0.800, -0.574	9.8	b		100/103	L,I,M
180	N	ASN:180:A	-0.124	6	-0.296, -0.085	7.5	e		150/150	N,D			180	N	ASN:180:A	0.055	5*	-0.482, 0.382	9.5	e		46/47	D,N		180	N	ASN:180:A	-0.330	6	-0.561, -0.201	7.6	e		145/152	N,D,A,S,Y		180	N	ASN:180:A	-0.618	8	-0.778, -0.525	9.8	e	f	100/103	N,D
181	P	PRO:181:A	-0.170	6	-0.375, -0.085	7.5	e		150/150	P,H,T,V,A			181	P	PRO:181:A	-0.420	8	-0.711, -0.367	9.8	e	f	46/47	P		181	P	PRO:181:A	-0.811	9	-0.993, -0.715	9.8	e	f	145/152	P,V		181	P	PRO:181:A	-0.635	8	-0.820, -0.525	9.8	e	f	100/103	P,V
182	K	LYS:182:A	0.475	4	0.059, 0.485	5.4	e		150/150	K,R,S,F,Q,A,H,T			182	K	LYS:182:A	0.127	5*	-0.482, 0.382	9.5	e		46/47	K,R		182	K	LYS:182:A	-0.192	6	-0.501, 0.002	7.5	e		144/152	K,R,S,A,G		182	K	LYS:182:A	-0.196	6	-0.470, -0.079	7.5	e		100/103	K,S,A,G,R
183	E	GLU:183:A	3.077	1	1.405, 3.077	3.1	e		150/150	E,A,Q,K,N,D,L,M,T,H,S			183	E	GLU:183:A	4.183	1	2.251, 4.598	3.1	e		46/47	Q,K,E,A		183	E	GLU:183:A	1.904	2	0.893, 1.789	4.3	e		144/152	N,S,H,Q,K,E,A,T,R,M,L,I		183	E	GLU:183:A	1.614	3	0.797, 1.727	4.3	e		100/103	T,S,R,K,M,A,Q,L,N,E,I
184	Y	TYR:184:A	-0.251	6	-0.442, -0.201	8.6	b		150/150	Y,F,H,W			184	Y	TYR:184:A	-0.499	9	-0.713, -0.482	9.9	b	s	46/47	Y		184	Y	TYR:184:A	-0.986	9	-1.085, -0.938	9.9	b	s	144/152	Y		184	Y	TYR:184:A	-0.822	9	-0.894, -0.800	9.9	b	s	100/103	Y
185	S	SER:185:A	-0.459	8	-0.545, -0.375	8.7	e	f	150/150	S,T			185	S	SER:185:A	-0.583	9	-0.713, -0.564	9.9	e	f	46/47	S		185	S	SER:185:A	0.074	5	-0.287, 0.266	6.5	e		144/152	T,S,A,Q,E		185	S	SER:185:A	0.218	5	-0.178, 0.335	6.5	e		100/103	S,T,A,Q,E
186	E	GLU:186:A	0.012	5	-0.201, 0.059	6.5	e		150/150	E,D,V,I,A,T			186	E	GLU:186:A	-0.521	9	-0.713, -0.482	9.9	e	f	46/47	E		186	E	GLU:186:A	0.556	4	0.124, 0.893	5.4	e		144/152	D,E,N,A,T,V,S,F,L		186	E	GLU:186:A	0.498	4	0.037, 0.797	5.4	e		100/103	D,E,A,T,V,S,F,L
187	H	HIS:187:A	0.979	4	0.485, 1.405	4.3	e		150/150	H,N,E,R,G,L,F,A,T,Q,S,M,K,D			187	H	HIS:187:A	-0.554	9	-0.713, -0.527	9.9	e	f	46/47	H		187	H	HIS:187:A	0.425	4	0.002, 0.636	5.4	e		144/152	N,H,K,Q,A,D,S,M,R,G		187	H	HIS:187:A	0.779	4	0.335, 1.155	5.3	e		100/103	K,H,Q,A,D,S,M,R,G
188	E	GLU:188:A	-0.764	9	-0.776, -0.762	9.9	b	s	150/150	E			188	E	GLU:188:A	-0.521	9	-0.713, -0.482	9.9	b	s	46/47	E		188	E	GLU:188:A	-0.936	9	-1.038, -0.874	9.9	b	s	144/152	E,D		188	E	GLU:188:A	-0.756	9	-0.852, -0.692	9.9	b	s	100/103	E,D
189	L	LEU:189:A	-0.641	9	-0.713, -0.586	9.8	b	s	150/150	L,M,K,I			189	L	LEU:189:A	-0.513	9	-0.713, -0.482	9.9	b	s	46/47	L		189	L	LEU:189:A	-0.985	9	-1.085, -0.938	9.9	b	s	144/152	L		189	L	LEU:189:A	-0.822	9	-0.894, -0.800	9.9	b	s	100/103	L
190	E	GLU:190:A	-0.764	9	-0.776, -0.762	9.9	e	f	150/150	E			190	E	GLU:190:A	-0.521	9	-0.713, -0.482	9.9	e	f	46/47	E		190	E	GLU:190:A	-0.779	8	-0.938, -0.715	9.8	e	f	144/152	E,D,Q,K		190	E	GLU:190:A	-0.683	9	-0.800, -0.617	9.8	e	f	100/103	Q,K,E
191	K	LYS:191:A	-0.301	7	-0.442, -0.201	8.6	e		150/150	K,R,T,Q,A			191	K	LYS:191:A	-0.540	9	-0.713, -0.527	9.9	e	f	46/47	K		191	K	LYS:191:A	-0.443	7	-0.667, -0.287	8.6	e		144/152	K,N,S,T,A,I		191	K	LYS:191:A	-0.337	7	-0.574, -0.178	8.6	e		100/103	S,T,A,I,K
192	I	ILE:192:A	-0.722	9	-0.756, -0.713	9.9	b	s	150/150	I,M			192	I	ILE:192:A	-0.582	9	-0.713, -0.564	9.9	b	s	46/47	I		192	I	ILE:192:A	-0.937	9	-1.038, -0.874	9.9	b	s	144/152	I,V		192	I	ILE:192:A	-0.758	9	-0.852, -0.692	9.9	b	s	100/103	I,V
193	T	THR:193:A	-0.768	9	-0.776, -0.767	9.9	b	s	150/150	T			193	T	THR:193:A	-0.568	9	-0.713, -0.564	9.9	b	s	46/47	T		193	T	THR:193:A	-0.840	9	-0.967, -0.759	9.8	b	s	145/152	T,A,I		193	T	THR:193:A	-0.847	9	-0.894, -0.837	9.9	b	s	100/103	T
194	R	ARG:194:A	-0.765	9	-0.776, -0.762	9.9	e	f	150/150	R			194	R	ARG:194:A	-0.527	9	-0.713, -0.527	9.9	e	f	46/47	R		194	R	ARG:194:A	-1.011	9	-1.085, -0.993	9.9	e	f	145/152	R		194	R	ARG:194:A	-0.839	9	-0.894, -0.820	9.9	e	f	100/103	R
195	R	ARG:195:A	-0.657	9	-0.727, -0.620	9.9	e	f	150/150	R,K,N,S			195	R	ARG:195:A	-0.527	9	-0.713, -0.527	9.9	e	f	46/47	R		195	R	ARG:195:A	-0.905	9	-1.038, -0.838	9.9	e	f	145/152	R,M		195	R	ARG:195:A	-0.839	9	-0.894, -0.820	9.9	e	f	100/103	R
196	F	PHE:196:A	-0.510	8	-0.620, -0.442	9.8	b		150/150	F,L			196	F	PHE:196:A	-0.516	9	-0.713, -0.482	9.9	b	s	46/47	F		196	F	PHE:196:A	-0.538	7	-0.800, -0.365	8.7	b		145/152	F,R,Y		196	F	PHE:196:A	-0.520	8	-0.724, -0.410	9.7	b		100/103	Y,F
197	T	THR:197:A	-0.116	6	-0.296, -0.085	7.5	b		150/150	T,A,C,S			197	T	THR:197:A	0.004	5*	-0.482, 0.186	9.5	b		46/47	A,T		197	T	THR:197:A	-0.642	8	-0.838, -0.501	9.7	b		145/152	T,A,E,C		197	T	THR:197:A	-0.537	8	-0.724, -0.410	9.7	b		100/103	T,A,C
198	L	LEU:198:A	-0.015	5	-0.201, 0.059	6.5	e		150/150	L,I,M,V			198	L	LEU:198:A	-0.513	9	-0.713, -0.482	9.9	e	f	46/47	L		198	L	LEU:198:A	0.025	5	-0.287, 0.266	6.5	e		144/152	M,L,V,T,I,A		198	L	LEU:198:A	-0.447	7	-0.656, -0.342	8.7	e		100/103	A,V,M,I,L
199	E	GLU:199:A	-0.461	8	-0.586, -0.375	8.7	e	f	150/150	E,N,M,Q,D,H,C			199	E	GLU:199:A	-0.521	9	-0.713, -0.482	9.9	e	f	46/47	E		199	E	GLU:199:A	-0.932	9	-1.038, -0.874	9.9	e	f	144/152	E,R		199	E	GLU:199:A	-0.850	9	-0.894, -0.837	9.9	e	f	100/103	E
200	L	LEU:200:A	-0.723	9	-0.762, -0.695	9.9	b	s	150/150	L,I			200	L	LEU:200:A	-0.513	9	-0.713, -0.482	9.9	b	s	46/47	L		200	L	LEU:200:A	-0.844	9	-1.017, -0.759	9.8	b	s	144/152	L,R		200	L	LEU:200:A	-0.822	9	-0.894, -0.800	9.9	b	s	100/103	L
201	A	ALA:201:A	-0.244	6	-0.375, -0.201	7.6	b		150/150	A,S,V,C,G,T			201	A	ALA:201:A	-0.055	5*	-0.527, 0.186	9.5	b		46/47	S,A		201	A	ALA:201:A	-0.543	7	-0.759, -0.365	8.7	b		145/152	A,S,P,Q,L		201	A	ALA:201:A	-0.557	8	-0.752, -0.470	9.7	b		100/103	A,L,S
202	K	LYS:202:A	-0.766	9	-0.776, -0.762	9.9	e	f	150/150	K			202	K	LYS:202:A	-0.540	9	-0.713, -0.527	9.9	e	f	46/47	K		202	K	LYS:202:A	-0.512	7	-0.715, -0.365	8.7	e		145/152	K,D,R,C		202	K	LYS:202:A	-0.402	7	-0.617, -0.266	8.6	e		100/103	K,R,C
203	K	LYS:203:A	-0.766	9	-0.776, -0.762	9.9	e	f	150/150	K			203	K	LYS:203:A	-0.540	9	-0.713, -0.527	9.9	e	f	46/47	K		203	K	LYS:203:A	-0.612	8	-0.800, -0.501	8.7	e	f	145/152	K,Q,X,R		203	K	LYS:203:A	-0.509	8	-0.692, -0.410	9.7	e	f	100/103	K,R
204	G	GLY:204:A	-0.631	9	-0.713, -0.586	9.8	e	f	150/150	G,N,K			204	G	GLY:204:A	-0.449	8	-0.711, -0.430	9.8	e	f	46/47	G		204	G	GLY:204:A	-0.722	8	-0.907, -0.616	9.8	e	f	145/152	G,D,N,H		204	G	GLY:204:A	-0.673	9	-0.800, -0.617	9.8	e	f	100/103	N,H,G
205	F	PHE:205:A	-0.764	9	-0.776, -0.762	9.9	b	s	150/150	F			205	F	PHE:205:A	-0.516	9	-0.713, -0.482	9.9	b	s	46/47	F		205	F	PHE:205:A	-0.690	8	-0.874, -0.561	9.7	b		145/152	F,L,C,M		205	F	PHE:205:A	-0.741	9	-0.852, -0.692	9.9	b	s	100/103	F,M
206	I	ILE:206:A	-0.591	8	-0.674, -0.545	9.8	b		150/150	I,M,L,V			206	I	ILE:206:A	-0.582	9	-0.713, -0.564	9.9	b	s	46/47	I		206	I	ILE:206:A	-0.938	9	-1.038, -0.874	9.9	b	s	145/152	I,L		206	I	ILE:206:A	-0.756	9	-0.852, -0.692	9.9	b	s	100/103	I,L
207	G	GLY:207:A	-0.757	9	-0.775, -0.756	9.9	b	s	150/150	G			207	G	GLY:207:A	-0.449	8	-0.711, -0.430	9.8	b		46/47	G		207	G	GLY:207:A	-0.947	9	-1.073, -0.907	9.9	b	s	145/152	G		207	G	GLY:207:A	-0.793	9	-0.890, -0.752	9.9	b	s	100/103	G
208	P	PRO:208:A	-0.679	9	-0.749, -0.650	9.9	b	s	150/150	P,A			208	P	PRO:208:A	-0.420	8	-0.711, -0.367	9.8	b		46/47	P		208	P	PRO:208:A	-0.806	8	-0.993, -0.715	9.8	b		145/152	P,H		208	P	PRO:208:A	-0.809	9	-0.894, -0.778	9.9	b	s	100/103	P
209	G	GLY:209:A	-0.645	9	-0.727, -0.586	9.8	e	f	150/150	G,S			209	G	GLY:209:A	-0.449	8	-0.711, -0.430	9.8	e	f	46/47	G		209	G	GLY:209:A	-0.369	7	-0.715, -0.201	8.6	e		145/152	G,H,R,A		209	G	GLY:209:A	-0.588	8	-0.800, -0.470	9.7	e	f	100/103	G,A
210	V	VAL:210:A	-0.204	6	-0.375, -0.085	7.5	e		150/150	V,I,L			210	V	VAL:210:A	-0.095	6*	-0.527, 0.186	9.5	e		46/47	I,V		210	V	VAL:210:A	-0.578	8	-0.759, -0.436	8.7	e	f	145/152	I,V,N		210	V	VAL:210:A	-0.564	8	-0.724, -0.470	9.7	e	f	100/103	I,V
211	D	ASP:211:A	-0.764	9	-0.776, -0.762	9.9	b	s	150/150	D			211	D	ASP:211:A	-0.524	9	-0.713, -0.482	9.9	b	s	46/47	D		211	D	ASP:211:A	-1.011	9	-1.085, -0.993	9.9	b	s	145/152	D		211	D	ASP:211:A	-0.840	9	-0.894, -0.820	9.9	b	s	100/103	D
212	V	VAL:212:A	-0.768	9	-0.776, -0.767	9.9	b	s	150/150	V			212	V	VAL:212:A	-0.576	9	-0.713, -0.564	9.9	b	s	46/47	V		212	V	VAL:212:A	-1.017	9	-1.085, -0.993	9.9	b	s	145/152	V		212	V	VAL:212:A	-0.844	9	-0.894, -0.820	9.9	b	s	100/103	V
213	P	PRO:213:A	-0.753	9	-0.775, -0.749	9.9	b	s	150/150	P			213	P	PRO:213:A	-0.420	8	-0.711, -0.367	9.8	b		46/47	P		213	P	PRO:213:A	-0.641	8	-0.874, -0.501	9.7	b		145/152	P,L,A		213	P	PRO:213:A	-0.809	9	-0.894, -0.778	9.9	b	s	100/103	P
214	A	ALA:214:A	-0.737	9	-0.767, -0.727	9.9	b	s	150/150	A,S			214	A	ALA:214:A	-0.553	9	-0.713, -0.527	9.9	b	s	46/47	A		214	A	ALA:214:A	-0.923	9	-1.038, -0.874	9.9	b	s	143/152	A,S,X		214	A	ALA:214:A	-0.846	9	-0.894, -0.837	9.9	b	s	100/103	A
215	P	PRO:215:A	-0.753	9	-0.775, -0.749	9.9	e	f	150/150	P			215	P	PRO:215:A	-0.420	8	-0.711, -0.367	9.8	e	f	46/47	P		215	P	PRO:215:A	-0.807	9	-0.993, -0.715	9.8	e	f	145/152	P,S		215	P	PRO:215:A	-0.809	9	-0.894, -0.778	9.9	e	f	100/103	P
216	D	ASP:216:A	-0.764	9	-0.776, -0.762	9.9	e	f	150/150	D			216	D	ASP:216:A	-0.524	9	-0.713, -0.482	9.9	e	f	46/47	D		216	D	ASP:216:A	-1.011	9	-1.085, -0.993	9.9	e	f	145/152	D		216	D	ASP:216:A	-0.840	9	-0.894, -0.820	9.9	e	f	100/103	D
217	M	MET:217:A	-0.727	9	-0.756, -0.713	9.9	e	f	150/150	M,V			217	M	MET:217:A	-0.591	9	-0.713, -0.564	9.9	e	f	46/47	M		217	M	MET:217:A	-0.563	7	-0.759, -0.436	8.7	e		145/152	M,V		217	M	MET:217:A	-0.332	7	-0.574, -0.178	8.6	e		100/103	M,V
218	G	GLY:218:A	-0.464	8	-0.586, -0.375	8.7	e	f	150/150	G,S,N,A			218	G	GLY:218:A	-0.449	8	-0.711, -0.430	9.8	e	f	46/47	G		218	G	GLY:218:A	-0.635	8	-0.838, -0.501	9.7	e	f	146/152	S,G,E,N		218	G	GLY:218:A	-0.742	9	-0.852, -0.692	9.9	e	f	100/103	G,N
219	T	THR:219:A	-0.742	9	-0.767, -0.727	9.9	b	s	150/150	T,S			219	T	THR:219:A	-0.568	9	-0.713, -0.564	9.9	b	s	46/47	T		219	T	THR:219:A	-0.842	9	-0.967, -0.759	9.8	b	s	146/152	T,A,K		219	T	THR:219:A	-0.847	9	-0.894, -0.837	9.9	b	s	100/103	T
220	G	GLY:220:A	-0.510	8	-0.650, -0.442	9.8	e	f	150/150	G,S			220	G	GLY:220:A	-0.449	8	-0.711, -0.430	9.8	e	f	46/47	G		220	G	GLY:220:A	0.028	5	-0.365, 0.266	7.5	e		146/152	G,S,T		220	G	GLY:220:A	0.111	5	-0.266, 0.335	6.5	e		100/103	S,T,G
221	E	GLU:221:A	-0.686	9	-0.739, -0.650	9.9	e	f	150/150	E,V,P			221	E	GLU:221:A	-0.521	9	-0.713, -0.482	9.9	e	f	46/47	E		221	E	GLU:221:A	-0.019	5	-0.365, 0.124	7.5	e		145/152	E,K,D,S,P,G,Q		221	E	GLU:221:A	0.202	5	-0.178, 0.335	6.5	e		100/103	D,S,E,P,G,Q
222	R	ARG:222:A	-0.691	9	-0.739, -0.674	9.9	e	f	150/150	R,K,T			222	R	ARG:222:A	-0.527	9	-0.713, -0.527	9.9	e	f	46/47	R		222	R	ARG:222:A	-0.680	8	-0.874, -0.561	9.7	e	f	145/152	R,W,G,H		222	R	ARG:222:A	-0.839	9	-0.894, -0.820	9.9	e	f	100/103	R
223	E	GLU:223:A	-0.648	9	-0.713, -0.620	9.9	b	s	150/150	E,Q,V			223	E	GLU:223:A	-0.521	9	-0.713, -0.482	9.9	b	s	46/47	E		223	E	GLU:223:A	-0.939	9	-1.038, -0.874	9.9	b	s	145/152	E,Q		223	E	GLU:223:A	-0.850	9	-0.894, -0.837	9.9	b	s	100/103	E
224	M	MET:224:A	-0.769	9	-0.776, -0.767	9.9	b	s	150/150	M			224	M	MET:224:A	-0.591	9	-0.713, -0.564	9.9	b	s	46/47	M		224	M	MET:224:A	-0.948	9	-1.038, -0.907	9.9	b	s	145/152	M,V		224	M	MET:224:A	-0.853	9	-0.894, -0.837	9.9	b	s	100/103	M
225	S	SER:225:A	-0.428	8	-0.545, -0.375	8.7	b		150/150	S,A,C,G			225	S	SER:225:A	-0.583	9	-0.713, -0.564	9.9	b	s	46/47	S		225	S	SER:225:A	-0.229	6	-0.501, -0.106	7.5	b		146/152	S,A,N		225	S	SER:225:A	-0.151	6	-0.410, 0.037	7.5	b		100/103	S,A,N
226	W	TRP:226:A	-0.754	9	-0.775, -0.749	9.9	b	s	150/150	W			226	W	TRP:226:A	-0.430	8	-0.711, -0.367	9.8	b		46/47	W		226	W	TRP:226:A	-0.942	9	-1.073, -0.874	9.9	b	s	145/152	W,X		226	W	TRP:226:A	-0.787	9	-0.890, -0.752	9.9	b	s	100/103	W
227	I	ILE:227:A	-0.602	9	-0.674, -0.545	9.8	b	s	150/150	I,L,V,M			227	I	ILE:227:A	-0.582	9	-0.713, -0.564	9.9	b	s	46/47	I		227	I	ILE:227:A	-0.175	6	-0.436, 0.002	7.5	b		146/152	I,L,M,V		227	I	ILE:227:A	0.084	5	-0.266, 0.335	6.5	b		101/103	L,M,I,V
228	A	ALA:228:A	-0.617	9	-0.695, -0.586	9.8	b	s	150/150	A,S,C			228	A	ALA:228:A	-0.553	9	-0.713, -0.527	9.9	b	s	46/47	A		228	A	ALA:228:A	-0.170	6	-0.436, 0.002	7.5	b		146/152	A,T,C,V,L,E,S		228	A	ALA:228:A	-0.017	5	-0.342, 0.172	7.5	b		101/103	C,A,V,L,E,S
229	D	ASP:229:A	-0.727	9	-0.762, -0.713	9.9	e	f	150/150	D,S			229	D	ASP:229:A	-0.524	9	-0.713, -0.482	9.9	e	f	46/47	D		229	D	ASP:229:A	-1.012	9	-1.085, -0.993	9.9	e	f	146/152	D		229	D	ASP:229:A	-0.840	9	-0.894, -0.820	9.9	e	f	101/103	D
230	T	THR:230:A	-0.768	9	-0.776, -0.767	9.9	b	s	150/150	T			230	T	THR:230:A	-0.568	9	-0.713, -0.564	9.9	b	s	46/47	T		230	T	THR:230:A	-0.771	8	-0.938, -0.667	9.8	b		145/152	T,I,Q		230	T	THR:230:A	-0.764	9	-0.852, -0.724	9.9	b	s	100/103	Q,T
231	Y	TYR:231:A	-0.164	6	-0.375, -0.085	7.5	b		150/150	Y,F			231	Y	TYR:231:A	-0.499	9	-0.713, -0.482	9.9	b	s	46/47	Y		231	Y	TYR:231:A	-0.845	9	-1.017, -0.759	9.8	b	s	145/152	Y,C		231	Y	TYR:231:A	-0.822	9	-0.894, -0.800	9.9	b	s	100/103	Y
232	A	ALA:232:A	0.039	5	-0.201, 0.059	6.5	e		150/150	A,S,G,E,T			232	A	ALA:232:A	-0.553	9	-0.713, -0.527	9.9	e	f	46/47	A		232	A	ALA:232:A	0.593	4	0.124, 0.893	5.4	e		145/152	A,S,G,I,V,Q,T,M,L		232	A	ALA:232:A	0.962	4	0.335, 1.155	5.3	e		100/103	S,G,I,V,Q,T,M,L,A
233	K	LYS:233:A	-0.133	6	-0.296, -0.085	7.5	e		150/150	K,N,S,Q,T,M			233	K	LYS:233:A	-0.540	9	-0.713, -0.527	9.9	e	f	46/47	K		233	K	LYS:233:A	-0.659	8	-0.838, -0.561	9.7	e	f	146/152	S,K,G,R,N		233	K	LYS:233:A	-0.846	9	-0.894, -0.837	9.9	e	f	100/103	K
234	T	THR:234:A	-0.714	9	-0.749, -0.695	9.9	e	f	150/150	T,S,A			234	T	THR:234:A	-0.568	9	-0.713, -0.564	9.9	e	f	46/47	T		234	T	THR:234:A	-0.841	9	-0.967, -0.759	9.8	e	f	146/152	T,V,I		234	T	THR:234:A	-0.847	9	-0.894, -0.837	9.9	e	f	100/103	T
235	I	ILE:235:A	0.085	5	-0.201, 0.241	6.5	e		150/150	I,V,M,L,T,S,Y,H			235	I	ILE:235:A	-0.582	9	-0.713, -0.564	9.9	e	f	46/47	I		235	I	ILE:235:A	0.078	5	-0.287, 0.266	6.5	e		147/152	I,M,F,K,Y		235	I	ILE:235:A	-0.247	6	-0.525, -0.079	8.5	e		101/103	F,I,Y
236	G	GLY:236:A	-0.696	9	-0.756, -0.674	9.9	b	s	150/150	G,A			236	G	GLY:236:A	-0.449	8	-0.711, -0.430	9.8	b		46/47	G		236	G	GLY:236:A	-0.572	7	-0.838, -0.436	9.7	b		147/152	G,R		236	G	GLY:236:A	-0.794	9	-0.890, -0.752	9.9	b	s	101/103	G
237	H	HIS:237:A	0.124	5	-0.085, 0.241	5.5	e		150/150	H,Y,F,W,S			237	H	HIS:237:A	-0.554	9	-0.713, -0.527	9.9	e	f	46/47	H		237	H	HIS:237:A	-0.194	6	-0.501, 0.002	7.5	e		147/152	H,K,Y,F		237	H	HIS:237:A	-0.202	6	-0.470, -0.079	7.5	e		101/103	H,Y,F
238	L	LEU:238:A	2.182	2	0.834, 3.077	4.1	e		150/150	L,N,T,K,R,Q,D,M,Y,H,S,G,A,F,E			238	L	LEU:238:A	0.240	5*	-0.430, 0.634	8.4	e		46/47	L,N		238	L	LEU:238:A	0.128	5	-0.201, 0.433	6.4	e		147/152	Y,L,N,C,K,R,Q,D		238	L	LEU:238:A	0.060	5	-0.266, 0.335	6.5	e		101/103	K,R,N,Q,D,L
239	D	ASP:239:A	-0.463	8	-0.586, -0.375	8.7	e	f	150/150	D,N,E			239	D	ASP:239:A	-0.524	9	-0.713, -0.482	9.9	e	f	46/47	D		239	D	ASP:239:A	-0.694	8	-0.874, -0.561	9.7	e	f	148/152	D,F,S,N		239	D	ASP:239:A	-0.840	9	-0.894, -0.820	9.9	e	f	101/103	D
240	I	ILE:240:A	-0.486	8	-0.586, -0.442	8.8	e	f	150/150	I,M,L,Q			240	I	ILE:240:A	-0.582	9	-0.713, -0.564	9.9	e	f	46/47	I		240	I	ILE:240:A	-0.679	8	-0.838, -0.561	9.7	e	f	148/152	I,L,V,M		240	I	ILE:240:A	-0.568	8	-0.724, -0.470	9.7	e	f	101/103	I,V,M,L
241	N	ASN:241:A	-0.628	9	-0.695, -0.586	9.8	e	f	150/150	N,T,H,D			241	N	ASN:241:A	-0.564	9	-0.713, -0.564	9.9	e	f	46/47	N		241	N	ASN:241:A	-0.811	9	-0.938, -0.715	9.8	e	f	147/152	N,C,S,D		241	N	ASN:241:A	-0.700	9	-0.820, -0.617	9.8	e	f	101/103	N,S,D
242	A	ALA:242:A	-0.257	7	-0.442, -0.201	8.6	b		150/150	A,N,S,G,H			242	A	ALA:242:A	-0.553	9	-0.713, -0.527	9.9	b	s	46/47	A		242	A	ALA:242:A	-0.646	8	-0.838, -0.501	9.7	b		147/152	A,Q,S,T		242	A	ALA:242:A	-0.649	8	-0.778, -0.574	9.8	b		101/103	A,T,S
243	H	HIS:243:A	0.162	5	-0.085, 0.241	5.5	e		150/150	H,Y,S,N,R,A,M,F,K			243	H	HIS:243:A	-0.554	9	-0.713, -0.527	9.9	e	f	46/47	H		243	H	HIS:243:A	0.430	4	0.002, 0.636	5.4	e		148/152	H,K,A,Y,R,L,M,S,T		243	H	HIS:243:A	0.271	5	-0.079, 0.536	5.4	e		101/103	L,M,S,A,T,K,H
244	A	ALA:244:A	-0.675	9	-0.727, -0.650	9.9	b	s	150/150	A,G			244	A	ALA:244:A	-0.553	9	-0.713, -0.527	9.9	b	s	46/47	A		244	A	ALA:244:A	-0.926	9	-1.038, -0.874	9.9	b	s	148/152	A,W		244	A	ALA:244:A	-0.846	9	-0.894, -0.837	9.9	b	s	101/103	A
245	C	CYS:245:A	-0.764	9	-0.776, -0.762	9.9	b	s	150/150	C			245	C	CYS:245:A	-0.526	9	-0.713, -0.482	9.9	b	s	46/47	C		245	C	CYS:245:A	-0.665	8	-0.874, -0.561	9.7	b		148/152	C,T,V,I		245	C	CYS:245:A	-0.519	8	-0.692, -0.410	9.7	b		101/103	T,V,I,C
246	V	VAL:246:A	-0.541	8	-0.620, -0.498	9.8	b		150/150	V,I,T			246	V	VAL:246:A	-0.576	9	-0.713, -0.564	9.9	b	s	46/47	V		246	V	VAL:246:A	-0.518	7	-0.759, -0.365	8.7	b		147/152	V,L,T,C		246	V	VAL:246:A	-0.408	7	-0.617, -0.266	8.6	b		101/103	V,T,C
247	T	THR:247:A	-0.768	9	-0.776, -0.767	9.9	b	s	150/150	T			247	T	THR:247:A	-0.568	9	-0.713, -0.564	9.9	b	s	46/47	T		247	T	THR:247:A	-1.022	9	-1.085, -0.993	9.9	b	s	146/152	T		247	T	THR:247:A	-0.848	9	-0.894, -0.837	9.9	b	s	101/103	T
248	G	GLY:248:A	-0.757	9	-0.775, -0.756	9.9	b	s	150/150	G			248	G	GLY:248:A	-0.449	8	-0.711, -0.430	9.8	b		46/47	G		248	G	GLY:248:A	-0.758	8	-0.967, -0.616	9.8	b		146/152	G,S		248	G	GLY:248:A	-0.794	9	-0.890, -0.752	9.9	b	s	101/103	G
249	K	LYS:249:A	-0.766	9	-0.776, -0.762	9.9	b	s	150/150	K			249	K	LYS:249:A	-0.540	9	-0.713, -0.527	9.9	b	s	46/47	K		249	K	LYS:249:A	-1.020	9	-1.085, -0.993	9.9	b	s	146/152	K		249	K	LYS:249:A	-0.847	9	-0.894, -0.837	9.9	b	s	101/103	K
250	P	PRO:250:A	-0.753	9	-0.775, -0.749	9.9	e	f	150/150	P			250	P	PRO:250:A	-0.420	8	-0.711, -0.367	9.8	e	f	46/47	P		250	P	PRO:250:A	-0.970	9	-1.073, -0.938	9.9	e	f	146/152	P		250	P	PRO:250:A	-0.810	9	-0.894, -0.778	9.9	e	f	101/103	P
251	I	ILE:251:A	-0.723	9	-0.756, -0.713	9.9	e	f	150/150	I,V			251	I	ILE:251:A	-0.582	9	-0.713, -0.564	9.9	e	f	46/47	I		251	I	ILE:251:A	-0.391	7	-0.616, -0.201	8.6	e		146/152	I,L,V		251	I	ILE:251:A	-0.128	6	-0.410, 0.037	7.5	e		101/103	L,V,I
252	N	ASN:252:A	-0.451	8	-0.545, -0.375	8.7	e	f	150/150	N,S,H,T,L,P,A			252	N	ASN:252:A	-0.564	9	-0.713, -0.564	9.9	e	f	46/47	N		252	N	ASN:252:A	-0.060	5	-0.365, 0.124	7.5	e		146/152	S,N,R,C,H,A,E,D		252	N	ASN:252:A	-0.205	6	-0.470, -0.079	7.5	e		101/103	H,N,A,S,E,D
253	Q	GLN:253:A	-0.579	8	-0.650, -0.545	9.8	e	f	150/150	Q,H,S,V,M,T			253	Q	GLN:253:A	-0.569	9	-0.713, -0.564	9.9	e	f	46/47	Q		253	Q	GLN:253:A	-0.021	5	-0.287, 0.124	6.5	e		146/152	Q,I,V,N,T,S,F,M,L		253	Q	GLN:253:A	0.289	5	-0.079, 0.536	5.4	e		101/103	Q,I,V,N,T,S,F,M,L
254	G	GLY:254:A	-0.757	9	-0.775, -0.756	9.9	e	f	150/150	G			254	G	GLY:254:A	-0.449	8	-0.711, -0.430	9.8	e	f	46/47	G		254	G	GLY:254:A	-0.756	8	-0.967, -0.616	9.8	e	f	146/152	G,R		254	G	GLY:254:A	-0.794	9	-0.890, -0.752	9.9	e	f	101/103	G
255	G	GLY:255:A	-0.757	9	-0.775, -0.756	9.9	b	s	150/150	G			255	G	GLY:255:A	-0.449	8	-0.711, -0.430	9.8	b		46/47	G		255	G	GLY:255:A	-0.948	9	-1.073, -0.907	9.9	b	s	146/152	G		255	G	GLY:255:A	-0.794	9	-0.890, -0.752	9.9	b	s	101/103	G
256	I	ILE:256:A	-0.769	9	-0.776, -0.767	9.9	b	s	150/150	I			256	I	ILE:256:A	-0.582	9	-0.713, -0.564	9.9	b	s	46/47	I		256	I	ILE:256:A	-0.668	8	-0.838, -0.561	9.7	b		146/152	I,V		256	I	ILE:256:A	-0.465	7	-0.656, -0.342	8.7	b		101/103	I,V
257	H	HIS:257:A	-0.678	9	-0.727, -0.650	9.9	e	f	150/150	H,E,R,Q			257	H	HIS:257:A	-0.554	9	-0.713, -0.527	9.9	e	f	46/47	H		257	H	HIS:257:A	-0.649	8	-0.838, -0.561	9.7	e	f	146/152	H,Y,R,N		257	H	HIS:257:A	-0.564	8	-0.724, -0.470	9.7	e	f	101/103	R,N,H
258	G	GLY:258:A	-0.757	9	-0.775, -0.756	9.9	e	f	150/150	G			258	G	GLY:258:A	-0.449	8	-0.711, -0.430	9.8	e	f	46/47	G		258	G	GLY:258:A	-0.561	7	-0.838, -0.365	9.7	e		146/152	G,E,R		258	G	GLY:258:A	-0.794	9	-0.890, -0.752	9.9	e	f	101/103	G
259	R	ARG:259:A	-0.765	9	-0.776, -0.762	9.9	e	f	150/150	R			259	R	ARG:259:A	-0.527	9	-0.713, -0.527	9.9	e	f	46/47	R		259	R	ARG:259:A	-0.686	8	-0.874, -0.561	9.7	e	f	146/152	R,Q,C,W		259	R	ARG:259:A	-0.840	9	-0.894, -0.820	9.9	e	f	101/103	R
260	V	VAL:260:A	0.012	5	-0.201, 0.059	6.5	e		150/150	V,I,T			260	V	VAL:260:A	-0.576	9	-0.713, -0.564	9.9	e	f	46/47	V		260	V	VAL:260:A	-0.108	5	-0.436, 0.124	7.5	e		146/152	I,V,T,H,F,E,N,A		260	V	VAL:260:A	-0.044	5	-0.342, 0.172	7.5	e		101/103	T,H,F,E,N,A,V
261	S	SER:261:A	-0.746	9	-0.770, -0.739	9.9	b	s	150/150	S,A			261	S	SER:261:A	-0.583	9	-0.713, -0.564	9.9	b	s	46/47	S		261	S	SER:261:A	-0.259	6	-0.501, -0.106	7.5	b		146/152	S,F,T,E,A,Q		261	S	SER:261:A	-0.298	7	-0.525, -0.178	8.6	b		101/103	E,A,S,Q
262	A	ALA:262:A	-0.767	9	-0.776, -0.767	9.9	b	s	150/150	A			262	A	ALA:262:A	-0.553	9	-0.713, -0.527	9.9	b	s	46/47	A		262	A	ALA:262:A	-0.830	9	-0.967, -0.759	9.8	b	s	146/152	A,G,V		262	A	ALA:262:A	-0.846	9	-0.894, -0.837	9.9	b	s	101/103	A
263	T	THR:263:A	-0.768	9	-0.776, -0.767	9.9	e	f	150/150	T			263	T	THR:263:A	-0.568	9	-0.713, -0.564	9.9	e	f	46/47	T		263	T	THR:263:A	-0.743	8	-0.907, -0.667	9.8	e	f	146/152	T,C,A,I		263	T	THR:263:A	-0.848	9	-0.894, -0.837	9.9	e	f	101/103	T
264	G	GLY:264:A	-0.757	9	-0.775, -0.756	9.9	b	s	150/150	G			264	G	GLY:264:A	-0.449	8	-0.711, -0.430	9.8	b		46/47	G		264	G	GLY:264:A	-0.948	9	-1.073, -0.907	9.9	b	s	146/152	G		264	G	GLY:264:A	-0.794	9	-0.890, -0.752	9.9	b	s	101/103	G
265	R	ARG:265:A	-0.765	9	-0.776, -0.762	9.9	b	s	150/150	R			265	R	ARG:265:A	-0.527	9	-0.713, -0.527	9.9	b	s	46/47	R		265	R	ARG:265:A	-0.683	8	-0.874, -0.561	9.7	b		144/152	R,Q,H,K		265	R	ARG:265:A	-0.727	9	-0.837, -0.656	9.8	b	s	101/103	R,K
266	G	GLY:266:A	-0.757	9	-0.775, -0.756	9.9	b	s	150/150	G			266	G	GLY:266:A	-0.449	8	-0.711, -0.430	9.8	b		46/47	G		266	G	GLY:266:A	-0.549	7	-0.838, -0.365	9.7	b		144/152	G,V,R		266	G	GLY:266:A	-0.794	9	-0.890, -0.752	9.9	b	s	101/103	G
267	V	VAL:267:A	-0.379	7	-0.498, -0.296	8.7	b		150/150	V,I,L			267	V	VAL:267:A	-0.576	9	-0.713, -0.564	9.9	b	s	46/47	V		267	V	VAL:267:A	-0.180	6	-0.501, 0.002	7.5	b		144/152	V,L,X,I		267	V	VAL:267:A	-0.736	9	-0.852, -0.692	9.9	b	s	100/103	V,L
268	F	PHE:268:A	-0.305	7	-0.442, -0.201	8.6	b		150/150	F,Y			268	F	PHE:268:A	-0.516	9	-0.713, -0.482	9.9	b	s	46/47	F		268	F	PHE:268:A	-0.464	7	-0.759, -0.287	8.6	b		145/152	F,Y,W		268	F	PHE:268:A	-0.219	6	-0.525, 0.037	8.5	b		100/103	F,Y,W
269	H	HIS:269:A	-0.707	9	-0.749, -0.674	9.9	b	s	150/150	H,Y,N			269	H	HIS:269:A	-0.554	9	-0.713, -0.527	9.9	b	s	46/47	H		269	H	HIS:269:A	-0.378	7	-0.616, -0.201	8.6	b		145/152	H,Q,Y,L,R,I,K		269	H	HIS:269:A	-0.618	8	-0.778, -0.525	9.8	b		100/103	I,K,H
270	G	GLY:270:A	-0.757	9	-0.775, -0.756	9.9	b	s	150/150	G			270	G	GLY:270:A	-0.449	8	-0.711, -0.430	9.8	b		46/47	G		270	G	GLY:270:A	0.339	5	-0.106, 0.636	5.4	b		145/152	G,E,A,S,T		270	G	GLY:270:A	0.312	5	-0.079, 0.536	5.4	b		100/103	A,S,T,G
271	L	LEU:271:A	0.101	5	-0.201, 0.241	6.5	b		150/150	L,I,T,V			271	L	LEU:271:A	-0.513	9	-0.713, -0.482	9.9	b	s	46/47	L		271	L	LEU:271:A	-0.054	5	-0.365, 0.124	7.5	b		145/152	I,L,V,T,A,G		271	L	LEU:271:A	-0.113	6	-0.470, 0.037	7.5	b		100/103	T,A,G,L
272	E	GLU:272:A	0.058	5	-0.201, 0.241	6.5	e		150/150	E,D,Q,N,A,H,Y			272	E	GLU:272:A	0.157	5*	-0.482, 0.382	9.5	e		46/47	D,E		272	E	GLU:272:A	-0.432	7	-0.667, -0.287	8.6	e		145/152	E,D,Q,N		272	E	GLU:272:A	-0.396	7	-0.617, -0.266	8.6	e		100/103	N,E,D
273	N	ASN:273:A	-0.681	9	-0.727, -0.650	9.9	e	f	150/150	N,Q,L			273	N	ASN:273:A	-0.564	9	-0.713, -0.564	9.9	e	f	46/47	N		273	N	ASN:273:A	0.064	5	-0.287, 0.266	6.5	e		145/152	N,H,C,V,L,I,M		273	N	ASN:273:A	0.444	4	0.037, 0.797	5.4	e		100/103	C,V,L,I,M,N
274	F	PHE:274:A	-0.724	9	-0.762, -0.713	9.9	b	s	150/150	F,Y			274	F	PHE:274:A	-0.516	9	-0.713, -0.482	9.9	b	s	46/47	F		274	F	PHE:274:A	-0.844	9	-1.017, -0.759	9.8	b	s	145/152	F,L		274	F	PHE:274:A	-0.821	9	-0.894, -0.800	9.9	b	s	100/103	F
275	I	ILE:275:A	0.070	5	-0.201, 0.241	6.5	b		150/150	I,V,L,M,A,S,C,T			275	I	ILE:275:A	-0.582	9	-0.713, -0.564	9.9	b	s	46/47	I		275	I	ILE:275:A	0.421	4	0.002, 0.636	5.4	b		145/152	I,V,N,A,T,L,M		275	I	ILE:275:A	0.582	4	0.172, 0.797	5.4	b		100/103	V,A,T,I,L,M
276	N	ASN:276:A	-0.160	6	-0.375, -0.085	7.5	e		150/150	N,M,K,C,Q,H,L,D,E			276	N	ASN:276:A	0.630	4	-0.099, 0.971	6.4	e		46/47	K,N,R		276	N	ASN:276:A	0.330	5	0.002, 0.636	5.4	e		145/152	N,K,R,S,T,M,Q		276	N	ASN:276:A	0.448	4	0.037, 0.797	5.4	e		100/103	R,M,N,Q,K
277	E	GLU:277:A	-0.408	7	-0.545, -0.296	8.7	e		150/150	E,D,N,S			277	E	GLU:277:A	-0.521	9	-0.713, -0.482	9.9	e	f	46/47	E		277	E	GLU:277:A	-0.628	8	-0.838, -0.501	9.7	e	f	145/152	E,D		277	E	GLU:277:A	-0.628	8	-0.778, -0.525	9.8	e	f	100/103	E,D
278	A	ALA:278:A	-0.019	5	-0.201, 0.059	6.5	e		150/150	A,D,S,P,T,H,E,R,G,Q,K,V			278	A	ALA:278:A	-0.553	9	-0.713, -0.527	9.9	e	f	46/47	A		278	A	ALA:278:A	0.115	5	-0.201, 0.266	6.5	e		145/152	A,T,K,Q,P,E		278	A	ALA:278:A	0.286	5	-0.079, 0.536	5.4	e		100/103	K,T,Q,A,P,E
279	N	ASN:279:A	0.103	5	-0.085, 0.241	5.5	e		150/150	N,T,S,G,A,R,Q,E,L,Y,P,K,H,F			279	N	ASN:279:A	-0.031	5*	-0.527, 0.186	9.5	e		46/47	N,S		279	N	ASN:279:A	0.532	4	0.124, 0.893	5.4	e		145/152	S,N,P,E,D,G,Q,K		279	N	ASN:279:A	0.678	4	0.172, 0.797	5.4	e		100/103	E,D,N,G,S,Q,K
280	Y	TYR:280:A	0.292	5	-0.085, 0.485	5.4	b		150/150	Y,F,L,C			280	Y	TYR:280:A	0.267	5*	-0.430, 0.634	8.4	b		46/47	Y,F		280	Y	TYR:280:A	-0.257	6	-0.616, 0.002	8.5	b		145/152	Y,F,C,W		280	Y	TYR:280:A	-0.386	7	-0.656, -0.178	8.6	b		100/103	W,Y,F
281	M	MET:281:A	-0.706	9	-0.749, -0.674	9.9	b	s	150/150	M,T			281	M	MET:281:A	-0.595	9	-0.713, -0.595	9.9	b	s	47/47	M		281	M	MET:281:A	-0.874	9	-0.993, -0.800	9.8	b	s	149/152	M,T		281	M	MET:281:A	-0.854	9	-0.894, -0.837	9.9	b	s	101/103	M
282	S	SER:282:A	0.052	5	-0.201, 0.241	6.5	e		150/150	S,A,G,Q,K,D,E,N			282	S	SER:282:A	0.425	5	-0.205, 0.971	7.4	e		47/47	A,S		282	S	SER:282:A	0.397	4	0.002, 0.636	5.4	e		149/152	S,G,A,P,D,N,R,K,E		282	S	SER:282:A	0.226	5	-0.178, 0.536	6.4	e		101/103	N,R,D,K,G,E,A,S
283	Q	GLN:283:A	0.559	4	0.241, 0.834	5.4	e		150/150	Q,M,A,L,V,S,K,I,T,R			283	Q	GLN:283:A	0.325	5	-0.293, 0.634	7.4	e		47/47	M,Q		283	Q	GLN:283:A	0.919	4	0.433, 1.243	4.3	e		149/152	I,L,M,Q,V,F,N,A,E		283	Q	GLN:283:A	0.476	4	0.037, 0.797	5.4	e		101/103	A,E,L,V,Q,M,F
284	I	ILE:284:A	-0.015	5	-0.201, 0.059	6.5	b		150/150	I,V,C,L,M			284	I	ILE:284:A	-0.585	9	-0.713, -0.564	9.9	b	s	47/47	I		284	I	ILE:284:A	0.425	4	0.002, 0.636	5.4	b		149/152	L,I,V		284	I	ILE:284:A	0.282	5	-0.079, 0.536	5.4	b		101/103	I,V,L
285	G	GLY:285:A	-0.440	8	-0.586, -0.375	8.7	e	f	150/150	G,E,D,A,S,N			285	G	GLY:285:A	-0.455	8	-0.711, -0.430	9.8	e	f	47/47	G		285	G	GLY:285:A	-0.157	6	-0.501, 0.124	7.5	e		148/152	G,K,N,Q		285	G	GLY:285:A	0.020	5	-0.342, 0.172	7.5	e		101/103	G,K,N,Q
286	T	THR:286:A	0.370	4	0.059, 0.485	5.4	e		150/150	T,C,L,S,I,M,H,Q,N,V,A			286	T	THR:286:A	-0.572	9	-0.713, -0.564	9.9	e	f	47/47	T		286	T	THR:286:A	0.410	4	0.002, 0.636	5.4	e		148/152	M,T,L,W,F		286	T	THR:286:A	0.755	4	0.172, 1.155	5.3	e		101/103	L,W,F,T
287	T	THR:287:A	-0.032	5	-0.201, 0.059	6.5	e		150/150	T,D,E,K,S,C,N,L,P,A,I,F			287	T	THR:287:A	-0.572	9	-0.713, -0.564	9.9	e	f	47/47	T		287	T	THR:287:A	-0.247	6	-0.501, -0.106	7.5	e		148/152	T,E,K,Q,N,S		287	T	THR:287:A	0.004	5	-0.266, 0.172	6.5	e		101/103	E,K,Q,T,N,S
288	P	PRO:288:A	-0.167	6	-0.375, -0.085	7.5	e		150/150	P,T,Q			288	P	PRO:288:A	-0.426	8	-0.711, -0.367	9.8	e	f	47/47	P		288	P	PRO:288:A	-0.638	8	-0.838, -0.501	9.7	e	f	149/152	P,T		288	P	PRO:288:A	-0.595	8	-0.752, -0.470	9.7	e	f	101/103	P,T
289	G	GLY:289:A	-0.757	9	-0.775, -0.756	9.9	e	f	150/150	G			289	G	GLY:289:A	-0.455	8	-0.711, -0.430	9.8	e	f	47/47	G		289	G	GLY:289:A	-0.766	8	-0.967, -0.667	9.8	e	f	149/152	G,A		289	G	GLY:289:A	-0.794	9	-0.890, -0.752	9.9	e	f	101/103	G
290	W	TRP:290:A	0.507	4	0.059, 0.834	5.4	b		150/150	W,I,L,M,F,V			290	W	TRP:290:A	-0.436	8	-0.711, -0.430	9.8	b		47/47	W		290	W	TRP:290:A	0.041	5	-0.365, 0.266	7.5	b		149/152	F,W,L,M		290	W	TRP:290:A	-0.419	7	-0.692, -0.266	9.6	b		101/103	M,L,W
291	G	GLY:291:A	1.411	3	0.834, 1.405	4.3	e		150/150	G,A,K,E,Q,R,T,D,H,L,P,N			291	G	GLY:291:A	-0.455	8	-0.711, -0.430	9.8	e	f	47/47	G		291	G	GLY:291:A	0.893	4	0.433, 1.243	4.3	e		148/152	G,X,W,Q,R,E,K,D		291	G	GLY:291:A	0.635	4	0.172, 0.797	5.4	e		101/103	E,K,D,Q,R,G
292	G	GLY:292:A	0.330	5	0.059, 0.485	5.4	e		150/150	G,N,D,E			292	G	GLY:292:A	-0.455	8	-0.711, -0.430	9.8	e	f	47/47	G		292	G	GLY:292:A	-0.386	7	-0.667, -0.201	8.6	e		149/152	D,G,N,E		292	G	GLY:292:A	-0.541	8	-0.724, -0.410	9.7	e	f	101/103	G,D
293	K	LYS:293:A	-0.766	9	-0.776, -0.762	9.9	b	s	150/150	K			293	K	LYS:293:A	-0.545	9	-0.713, -0.527	9.9	b	s	47/47	K		293	K	LYS:293:A	-1.020	9	-1.085, -0.993	9.9	b	s	148/152	K		293	K	LYS:293:A	-0.847	9	-0.894, -0.837	9.9	b	s	101/103	K
294	T	THR:294:A	-0.636	9	-0.695, -0.586	9.8	e	f	150/150	T,S			294	T	THR:294:A	0.946	4	0.029, 1.453	5.4	e		47/47	T,S		294	T	THR:294:A	0.907	4	0.433, 1.243	4.3	e		148/152	T,S,I,R,K		294	T	THR:294:A	0.688	4	0.172, 0.797	5.4	e		101/103	T,S,R,K
295	F	PHE:295:A	-0.297	7	-0.442, -0.201	8.6	b		150/150	F,Y,V,A,C			295	F	PHE:295:A	-0.521	9	-0.713, -0.482	9.9	b	s	47/47	F		295	F	PHE:295:A	-0.308	6	-0.561, -0.106	7.5	b		148/152	F,V,C,A,I		295	F	PHE:295:A	-0.132	6	-0.410, 0.037	7.5	b		101/103	V,C,A,I,F
296	I	ILE:296:A	-0.512	8	-0.620, -0.442	9.8	b		150/150	I,V,A			296	I	ILE:296:A	-0.585	9	-0.713, -0.564	9.9	b	s	47/47	I		296	I	ILE:296:A	-0.478	7	-0.715, -0.365	8.7	b		148/152	V,A,I		296	I	ILE:296:A	-0.665	8	-0.800, -0.574	9.8	b		101/103	I,V
297	V	VAL:297:A	0.213	5	-0.085, 0.241	5.5	b		150/150	V,I,L			297	V	VAL:297:A	-0.580	9	-0.713, -0.564	9.9	b	s	47/47	V		297	V	VAL:297:A	-0.626	8	-0.838, -0.501	9.7	b		149/152	V,A,I,C		297	V	VAL:297:A	-0.518	8	-0.692, -0.410	9.7	b		101/103	I,V,C
298	Q	GLN:298:A	-0.768	9	-0.776, -0.767	9.9	b	s	150/150	Q			298	Q	GLN:298:A	-0.573	9	-0.713, -0.564	9.9	b	s	47/47	Q		298	Q	GLN:298:A	-0.958	9	-1.057, -0.907	9.9	b	s	149/152	Q,E		298	Q	GLN:298:A	-0.855	9	-0.894, -0.837	9.9	b	s	101/103	Q
299	G	GLY:299:A	-0.757	9	-0.775, -0.756	9.9	b	s	150/150	G			299	G	GLY:299:A	-0.455	8	-0.711, -0.430	9.8	b		47/47	G		299	G	GLY:299:A	-0.762	8	-0.967, -0.667	9.8	b		149/152	G,E		299	G	GLY:299:A	-0.794	9	-0.890, -0.752	9.9	b	s	101/103	G
300	F	PHE:300:A	-0.390	7	-0.545, -0.296	8.7	b		150/150	F,L,V,A,C			300	F	PHE:300:A	-0.521	9	-0.713, -0.482	9.9	b	s	47/47	F		300	F	PHE:300:A	-0.433	7	-0.715, -0.287	8.6	b		149/152	F,Y		300	F	PHE:300:A	-0.207	6	-0.525, -0.079	8.5	b		101/103	Y,F
301	G	GLY:301:A	-0.757	9	-0.775, -0.756	9.9	e	f	150/150	G			301	G	GLY:301:A	-0.455	8	-0.711, -0.430	9.8	e	f	47/47	G		301	G	GLY:301:A	-0.763	8	-0.967, -0.667	9.8	e	f	149/152	G,C		301	G	GLY:301:A	-0.794	9	-0.890, -0.752	9.9	e	f	101/103	G
302	N	ASN:302:A	-0.767	9	-0.776, -0.767	9.9	e	f	150/150	N			302	N	ASN:302:A	-0.568	9	-0.713, -0.564	9.9	e	f	47/47	N		302	N	ASN:302:A	-0.965	9	-1.057, -0.907	9.9	e	f	149/152	N,D		302	N	ASN:302:A	-0.857	9	-0.896, -0.837	9.9	e	f	101/103	N
303	V	VAL:303:A	-0.768	9	-0.776, -0.767	9.9	e	f	150/150	V			303	V	VAL:303:A	-0.580	9	-0.713, -0.564	9.9	e	f	47/47	V		303	V	VAL:303:A	-0.924	9	-1.038, -0.874	9.9	e	f	149/152	V,E		303	V	VAL:303:A	-0.845	9	-0.894, -0.820	9.9	e	f	101/103	V
304	G	GLY:304:A	-0.757	9	-0.775, -0.756	9.9	b	s	150/150	G			304	G	GLY:304:A	-0.455	8	-0.711, -0.430	9.8	b		47/47	G		304	G	GLY:304:A	-0.952	9	-1.073, -0.907	9.9	b	s	149/152	G		304	G	GLY:304:A	-0.794	9	-0.890, -0.752	9.9	b	s	101/103	G
305	L	LEU:305:A	-0.381	7	-0.545, -0.296	8.7	b		150/150	L,M,F,Y,R			305	L	LEU:305:A	-0.518	9	-0.713, -0.482	9.9	b	s	47/47	L		305	L	LEU:305:A	-0.347	7	-0.616, -0.201	8.6	b		149/152	L,Q,R,F,M,S,T		305	L	LEU:305:A	-0.475	7	-0.656, -0.342	8.7	b		101/103	M,Q,S,T,L
306	H	HIS:306:A	-0.737	9	-0.767, -0.727	9.9	b	s	150/150	H,Y			306	H	HIS:306:A	-0.559	9	-0.713, -0.527	9.9	b	s	47/47	H		306	H	HIS:306:A	0.680	4	0.124, 0.893	5.4	b		150/152	H,Y,P,F,W		306	H	HIS:306:A	0.557	4	0.037, 0.797	5.4	b		101/103	Y,H,F,W
307	T	THR:307:A	-0.031	5	-0.201, 0.059	6.5	b		150/150	T,S,A,V,C			307	T	THR:307:A	0.383	5	-0.205, 0.634	7.4	b		47/47	S,T		307	T	THR:307:A	-0.585	8	-0.800, -0.436	8.7	b		150/152	S,T,A		307	T	THR:307:A	-0.548	8	-0.724, -0.470	9.7	b		101/103	A,S,T
308	T	THR:308:A	-0.298	7	-0.442, -0.201	8.6	b		150/150	T,C,M,A,I			308	T	THR:308:A	0.719	4	-0.099, 0.971	6.4	b		47/47	C,T		308	T	THR:308:A	0.261	5	-0.106, 0.433	5.4	b		150/152	M,C,T,A,G,S		308	T	THR:308:A	0.417	4	0.037, 0.536	5.4	b		101/103	A,G,S,C,T
309	R	ARG:309:A	-0.728	9	-0.762, -0.713	9.9	e	f	150/150	R,K			309	R	ARG:309:A	-0.532	9	-0.713, -0.527	9.9	e	f	47/47	R		309	R	ARG:309:A	-0.290	6	-0.561, -0.106	7.5	e		150/152	R,K,H,E,V,L,I		309	R	ARG:309:A	-0.170	6	-0.410, 0.037	7.5	e		101/103	H,E,V,L,K,I,R
310	Y	TYR:310:A	-0.717	9	-0.762, -0.695	9.9	b	s	150/150	Y,N			310	Y	TYR:310:A	-0.504	9	-0.713, -0.482	9.9	b	s	47/47	Y		310	Y	TYR:310:A	-0.151	6	-0.501, 0.124	7.5	b		150/152	Y,F,H,S		310	Y	TYR:310:A	0.100	5	-0.266, 0.335	6.5	b		101/103	F,H,Y,S
311	L	LEU:311:A	-0.597	8	-0.674, -0.545	9.8	b		150/150	L,F			311	L	LEU:311:A	-0.518	9	-0.713, -0.482	9.9	b	s	47/47	L		311	L	LEU:311:A	-0.413	7	-0.667, -0.287	8.6	b		150/152	L,F,V,I,A		311	L	LEU:311:A	-0.218	6	-0.470, -0.079	7.5	b		101/103	F,V,I,A,L
312	T	THR:312:A	0.129	5	-0.085, 0.241	5.5	e		150/150	T,H,V,C,D,N,A			312	T	THR:312:A	0.490	5	-0.205, 0.971	7.4	e		47/47	C,T,A		312	T	THR:312:A	-0.268	6	-0.561, -0.106	7.5	e		150/152	H,C,T,A,K,V,N,F		312	T	THR:312:A	0.041	5	-0.266, 0.172	6.5	e		101/103	K,H,V,N,F,C,T,A
313	R	ARG:313:A	-0.615	9	-0.695, -0.586	9.8	e	f	150/150	R,P,Y,G,C			313	R	ARG:313:A	-0.532	9	-0.713, -0.527	9.9	e	f	47/47	R		313	R	ARG:313:A	0.483	4	0.124, 0.636	5.4	e		150/152	R,H,N,C,Q,K,E,D		313	R	ARG:313:A	0.078	5	-0.266, 0.335	6.5	e		101/103	Q,K,R,E,D
314	A	ALA:314:A	0.014	5	-0.201, 0.059	6.5	e		150/150	A,V,F,Y,H,S,N,Q			314	A	ALA:314:A	-0.558	9	-0.713, -0.527	9.9	e	f	47/47	A		314	A	ALA:314:A	-0.618	8	-0.800, -0.501	8.7	e	f	150/152	F,A,S,V		314	A	ALA:314:A	-0.746	9	-0.852, -0.692	9.9	e	f	101/103	A,V
315	G	GLY:315:A	-0.628	9	-0.713, -0.586	9.8	e	f	150/150	G,D,H			315	G	GLY:315:A	-0.455	8	-0.711, -0.430	9.8	e	f	47/47	G		315	G	GLY:315:A	-0.392	7	-0.715, -0.201	8.6	e		150/152	G,R,S		315	G	GLY:315:A	-0.794	9	-0.890, -0.752	9.9	e	f	101/103	G
316	A	ALA:316:A	-0.615	9	-0.695, -0.586	9.8	b	s	150/150	A,G,C			316	A	ALA:316:A	-0.558	9	-0.713, -0.527	9.9	b	s	47/47	A		316	A	ALA:316:A	-0.607	8	-0.800, -0.501	8.7	b		150/152	A,G,C		316	A	ALA:316:A	-0.494	8	-0.692, -0.410	9.7	b		101/103	C,A,G
317	T	THR:317:A	0.535	4	0.241, 0.834	5.4	e		150/150	T,K,V,A,R,S,I			317	T	THR:317:A	-0.572	9	-0.713, -0.564	9.9	e	f	47/47	T		317	T	THR:317:A	-0.930	9	-1.038, -0.874	9.9	e	f	150/152	K,T		317	T	THR:317:A	-0.745	9	-0.852, -0.692	9.9	e	f	101/103	K,T
318	C	CYS:318:A	-0.542	8	-0.650, -0.498	9.8	b		150/150	C,V			318	C	CYS:318:A	-0.531	9	-0.713, -0.527	9.9	b	s	47/47	C		318	C	CYS:318:A	0.084	5	-0.287, 0.266	6.5	b		150/152	C,G,V,I,L		318	C	CYS:318:A	0.095	5	-0.266, 0.335	6.5	b		101/103	V,I,L,C
319	I	ILE:319:A	-0.037	5	-0.201, 0.059	6.5	b		150/150	I,V			319	I	ILE:319:A	1.394	4	0.382, 2.251	5.3	b		47/47	I,V		319	I	ILE:319:A	0.252	5	-0.106, 0.433	5.4	b		150/152	I,V		319	I	ILE:319:A	-0.287	7	-0.525, -0.178	8.6	b		101/103	I,V
320	G	GLY:320:A	-0.694	9	-0.756, -0.674	9.9	b	s	150/150	G,A			320	G	GLY:320:A	-0.455	8	-0.711, -0.430	9.8	b		47/47	G		320	G	GLY:320:A	-0.096	5	-0.436, 0.124	7.5	b		150/152	A,G		320	G	GLY:320:A	-0.794	9	-0.890, -0.752	9.9	b	s	101/103	G
321	V	VAL:321:A	0.405	4	0.059, 0.485	5.4	b		150/150	V,I			321	V	VAL:321:A	0.945	4	0.029, 1.453	5.4	b		47/47	I,V		321	V	VAL:321:A	0.120	5	-0.201, 0.266	6.5	b		150/152	V,I,L		321	V	VAL:321:A	0.292	5	-0.079, 0.536	5.4	b		101/103	I,V,L
322	I	ILE:322:A	1.049	3	0.485, 1.405	4.3	b		150/150	I,L,M,V,K,G,T,A,Q,C			322	I	ILE:322:A	-0.127	6*	-0.527, 0.029	9.5	b		47/47	I,V		322	I	ILE:322:A	0.309	5	-0.106, 0.636	5.4	b		150/152	G,I,V,D,S,K,Q,H,E		322	I	ILE:322:A	0.007	5	-0.266, 0.172	6.5	b		101/103	K,I,Q,H,E,V
323	E	GLU:323:A	-0.764	9	-0.776, -0.762	9.9	e	f	150/150	E			323	E	GLU:323:A	-0.526	9	-0.713, -0.482	9.9	e	f	47/47	E		323	E	GLU:323:A	-0.943	9	-1.038, -0.874	9.9	e	f	150/152	E,D		323	E	GLU:323:A	-0.851	9	-0.894, -0.837	9.9	e	f	101/103	E
324	H	HIS:324:A	3.054	1	1.405, 3.077	3.1	e		150/150	H,R,W,Y,V,I,L,M,S,K,F			324	H	HIS:324:A	-0.559	9	-0.713, -0.527	9.9	e	f	47/47	H		324	H	HIS:324:A	2.820	1	1.243, 3.269	3.1	e		150/152	S,I,H,F,A,R,K,V,M,W,L		324	H	HIS:324:A	3.217	1	1.727, 3.323	3.1	e		101/103	A,R,K,I,V,F,M,H,W,S,L
325	D	ASP:325:A	-0.346	7	-0.498, -0.296	8.7	e		150/150	D,N,E			325	D	ASP:325:A	-0.529	9	-0.713, -0.527	9.9	e	f	47/47	D		325	D	ASP:325:A	0.501	4	0.124, 0.893	5.4	e		150/152	D,E,V,R,N,H,T		325	D	ASP:325:A	-0.496	8	-0.692, -0.410	9.7	e	f	101/103	D,T,N
326	G	GLY:326:A	-0.180	6	-0.375, -0.085	7.5	e		150/150	G,C,A			326	G	GLY:326:A	-0.455	8	-0.711, -0.430	9.8	e	f	47/47	G		326	G	GLY:326:A	1.417	3	0.636, 1.789	4.3	e		150/152	G,E,R,V,I,F,Y,S,T,C		326	G	GLY:326:A	0.932	4	0.335, 1.155	5.3	e		101/103	V,I,F,Y,S,T,C,G
327	T	THR:327:A	0.205	5	-0.085, 0.241	5.5	e		150/150	T,S,A,V,G,E,C,N,Q			327	T	THR:327:A	0.354	5	-0.293, 0.634	7.4	e		47/47	S,T,C		327	T	THR:327:A	-0.643	8	-0.800, -0.561	8.7	e	f	150/152	S,T,C,G,Q,A		327	T	THR:327:A	-0.521	8	-0.692, -0.410	9.7	e	f	101/103	S,Q,A,T,C
328	L	LEU:328:A	-0.577	8	-0.650, -0.545	9.8	b		150/150	L,I,V			328	L	LEU:328:A	-0.082	6*	-0.527, 0.186	9.5	b		47/47	I,L		328	L	LEU:328:A	0.282	5	-0.106, 0.433	5.4	b		150/152	I,L,T,V,M		328	L	LEU:328:A	0.173	5	-0.178, 0.335	6.5	b		101/103	L,I
329	Y	TYR:329:A	1.368	3	0.834, 1.405	4.3	e		150/150	Y,F,I,V,S,C,H,W,M			329	Y	TYR:329:A	4.218	1	2.251, 4.598	3.1	e		47/47	F,Y		329	Y	TYR:329:A	2.938	1	1.789, 3.269	3.1	e		150/152	W,Y,F,M,H,V,K,T,I		329	Y	TYR:329:A	2.952	1	1.727, 3.323	3.1	e		101/103	M,H,V,K,Y,T,F,I
330	N	ASN:330:A	-0.599	9	-0.674, -0.545	9.8	e	f	150/150	N,S,C			330	N	ASN:330:A	0.460	5	-0.205, 0.971	7.4	e		47/47	N,S,C		330	N	ASN:330:A	-0.655	8	-0.838, -0.561	9.7	e	f	150/152	N,S,C		330	N	ASN:330:A	-0.519	8	-0.692, -0.410	9.7	e	f	101/103	N,C,S
331	P	PRO:331:A	3.075	1	1.405, 3.077	3.1	e		150/150	P,Q,S,K,E,A,G,H,N,T,D,Y,L,R			331	P	PRO:331:A	1.340	4	0.186, 2.251	5.3	e		47/47	P,S,Q		331	P	PRO:331:A	2.491	2	1.243, 3.269	3.1	e		150/152	P,S,Q,D,E,K,R,N,A,T		331	P	PRO:331:A	2.595	1	1.155, 3.323	3.1	e		101/103	D,E,P,K,R,N,A,Q,T,S
332	E	GLU:332:A	2.722	1	1.405, 3.077	3.1	e		150/150	E,Q,G,D,N,T,S,K,A,H,R			332	E	GLU:332:A	0.632	4	-0.099, 0.971	6.4	e		47/47	Q,E,A		332	E	GLU:332:A	0.337	5	-0.106, 0.636	5.4	e		150/152	D,Q,E,A,R,S,T,N,K		332	E	GLU:332:A	0.262	5	-0.079, 0.536	5.4	e		101/103	E,S,T,N,D,Q,K,A
333	G	GLY:333:A	-0.757	9	-0.775, -0.756	9.9	e	f	150/150	G			333	G	GLY:333:A	-0.455	8	-0.711, -0.430	9.8	e	f	47/47	G		333	G	GLY:333:A	-0.764	8	-0.967, -0.667	9.8	e	f	150/152	G,D		333	G	GLY:333:A	-0.794	9	-0.890, -0.752	9.9	e	f	101/103	G
334	I	ILE:334:A	-0.479	8	-0.586, -0.442	8.8	b		150/150	I,L,M			334	I	ILE:334:A	-0.585	9	-0.713, -0.564	9.9	b	s	47/47	I		334	I	ILE:334:A	-0.771	8	-0.938, -0.667	9.8	b		150/152	I,F,T,N		334	I	ILE:334:A	-0.851	9	-0.894, -0.837	9.9	b	s	101/103	I
335	D	ASP:335:A	-0.242	6	-0.442, -0.201	8.6	e		150/150	D,N,S,H			335	D	ASP:335:A	-0.529	9	-0.713, -0.527	9.9	e	f	47/47	D		335	D	ASP:335:A	-0.810	9	-0.967, -0.715	9.8	e	f	150/152	D,N		335	D	ASP:335:A	-0.619	8	-0.778, -0.525	9.8	e	f	101/103	D,N
336	P	PRO:336:A	-0.678	9	-0.749, -0.650	9.9	b	s	150/150	P,A			336	P	PRO:336:A	-0.426	8	-0.711, -0.367	9.8	b		47/47	P		336	P	PRO:336:A	-0.349	7	-0.616, -0.201	8.6	b		150/152	P,V,I		336	P	PRO:336:A	-0.156	6	-0.470, 0.037	7.5	b		101/103	V,I,P
337	K	LYS:337:A	-0.475	8	-0.586, -0.442	8.8	e	f	150/150	K,R,T,L,I			337	K	LYS:337:A	-0.545	9	-0.713, -0.527	9.9	e	f	47/47	K		337	K	LYS:337:A	0.205	5	-0.106, 0.433	5.4	e		150/152	K,N,G,D,E,T		337	K	LYS:337:A	0.446	4	0.037, 0.797	5.4	e		101/103	G,K,N,D,E,T
338	L	LEU:338:A	0.846	4	0.485, 0.834	4.4	e		150/150	L,A,Q,K,E,H,D			338	L	LEU:338:A	4.081	1	2.251, 4.598	3.1	e		47/47	A,T,E,L,Q		338	L	LEU:338:A	0.614	4	0.124, 0.893	5.4	e		151/152	E,A,T,L,Q,D,G,S		338	L	LEU:338:A	0.906	4	0.335, 1.155	5.3	e		102/103	E,G,A,S,D,T,L,Q
339	L	LEU:339:A	-0.558	8	-0.650, -0.498	9.8	b		150/150	L,I,V,M			339	L	LEU:339:A	-0.518	9	-0.713, -0.482	9.9	b	s	47/47	L		339	L	LEU:339:A	-0.723	8	-0.907, -0.616	9.8	b		151/152	L,R,V		339	L	LEU:339:A	-0.678	9	-0.820, -0.617	9.8	b	s	102/103	L,V
340	E	GLU:340:A	-0.649	9	-0.713, -0.620	9.9	b	s	150/150	E,V,Q			340	E	GLU:340:A	-0.526	9	-0.713, -0.482	9.9	b	s	47/47	E		340	E	GLU:340:A	0.434	4	0.002, 0.636	5.4	b		151/152	E,A,V,G,S,M,F,L,I		340	E	GLU:340:A	0.601	4	0.172, 0.797	5.4	b		102/103	A,G,S,M,F,L,I,E
341	D	ASP:341:A	0.934	4	0.485, 1.405	4.3	e		150/150	D,E,T,N,L,K			341	D	ASP:341:A	-0.529	9	-0.713, -0.527	9.9	e	f	47/47	D		341	D	ASP:341:A	1.751	3	0.893, 1.789	4.3	e		151/152	D,N,E,A,S,R,Q,K,T,L		341	D	ASP:341:A	1.842	3	0.797, 1.727	4.3	e		102/103	S,R,D,Q,E,K,N,A,T,L
342	Y	TYR:342:A	0.165	5	-0.085, 0.241	5.5	b		150/150	Y,W,H,F			342	Y	TYR:342:A	0.272	5*	-0.430, 0.634	8.4	b		47/47	Y,W		342	Y	TYR:342:A	0.263	5	-0.106, 0.433	5.4	b		151/152	F,Y,W,H		342	Y	TYR:342:A	0.062	5	-0.266, 0.335	6.5	b		102/103	Y,F,H,W
343	K	LYS:343:A	0.047	5	-0.201, 0.241	6.5	e		150/150	K,R,Q,L,H,V,M,S			343	K	LYS:343:A	0.100	5*	-0.482, 0.382	9.5	e		47/47	R,K		343	K	LYS:343:A	1.052	4	0.433, 1.243	4.3	e		151/152	K,R,Y,V,F,T,M,L		343	K	LYS:343:A	1.189	3	0.536, 1.727	4.3	e		102/103	K,Y,V,F,T,M,L,R
344	N	ASN:344:A	1.091	3	0.485, 1.405	4.3	e		150/150	N,I,L,T,M,D,S,K,V,F,W,E			344	N	ASN:344:A	-0.568	9	-0.713, -0.564	9.9	e	f	47/47	N		344	N	ASN:344:A	1.586	3	0.893, 1.789	4.3	e		151/152	L,N,V,R,T,A,F,E,D,S,G,Q,I		344	N	ASN:344:A	1.546	3	0.797, 1.727	4.3	e		102/103	R,T,A,F,E,D,S,G,Q,I,N
345	E	GLU:345:A	1.312	3	0.834, 1.405	4.3	e		150/150	E,D,S,T,A,N,Q,K,H,G			345	E	GLU:345:A	-0.526	9	-0.713, -0.482	9.9	e	f	47/47	E		345	E	GLU:345:A	0.124	5	-0.201, 0.266	6.5	e		151/152	Q,E,R,L,H,N,D,T,A		345	E	GLU:345:A	0.271	5	-0.079, 0.536	5.4	e		102/103	L,E,Q,H,N,D,T,A
346	H	HIS:346:A	0.917	4	0.485, 0.834	4.4	e		150/150	H,V,A,K,N,T,S,Q,R			346	H	HIS:346:A	0.743	4	-0.099, 1.453	6.4	e		47/47	H,K		346	H	HIS:346:A	-0.241	6	-0.501, -0.106	7.5	e		151/152	H,K,N,Q,T		346	H	HIS:346:A	-0.007	5	-0.342, 0.172	7.5	e		102/103	N,H,Q,K,T
347	G	GLY:347:A	-0.085	5	-0.296, 0.059	7.5	e		150/150	G,K,R,N,E			347	G	GLY:347:A	-0.455	8	-0.711, -0.430	9.8	e	f	47/47	G		347	G	GLY:347:A	-0.135	6	-0.436, 0.124	7.5	e		151/152	G,N,K,Q,D,R		347	G	GLY:347:A	0.006	5	-0.342, 0.172	7.5	e		102/103	N,K,Q,D,G,R
348	T	THR:348:A	-0.264	7	-0.442, -0.201	8.6	e		150/150	T,S			348	T	THR:348:A	-0.572	9	-0.713, -0.564	9.9	e	f	47/47	T		348	T	THR:348:A	-0.074	5	-0.365, 0.124	7.5	e		151/152	S,T		348	T	THR:348:A	-0.085	5	-0.342, 0.037	7.5	e		102/103	S,T
349	I	ILE:349:A	-0.292	7	-0.442, -0.201	8.6	b		150/150	I,V,L,C			349	I	ILE:349:A	-0.092	6*	-0.527, 0.186	9.5	b		47/47	I,V		349	I	ILE:349:A	0.018	5	-0.287, 0.266	6.5	b		151/152	I,V,L		349	I	ILE:349:A	0.021	5	-0.266, 0.172	6.5	b		102/103	I,V,L
350	V	VAL:350:A	0.421	4	0.059, 0.485	5.4	e		150/150	V,N,L,M,Q,I,T,K,S,R			350	V	VAL:350:A	-0.580	9	-0.713, -0.564	9.9	e	f	47/47	V		350	V	VAL:350:A	-0.497	7	-0.715, -0.365	8.7	e		151/152	L,V,M,K		350	V	VAL:350:A	-0.742	9	-0.852, -0.692	9.9	e	f	102/103	K,V
351	G	GLY:351:A	-0.563	8	-0.674, -0.498	9.8	e	f	150/150	G,N,D,T			351	G	GLY:351:A	-0.455	8	-0.711, -0.430	9.8	e	f	47/47	G		351	G	GLY:351:A	-0.769	8	-0.967, -0.667	9.8	e	f	151/152	G,C		351	G	GLY:351:A	-0.594	8	-0.800, -0.470	9.7	e	f	102/103	G,C
352	Y	TYR:352:A	-0.186	6	-0.375, -0.085	7.5	b		150/150	Y,F			352	Y	TYR:352:A	1.794	3	0.382, 2.251	5.3	b		47/47	F,Y		352	Y	TYR:352:A	0.281	5	-0.106, 0.636	5.4	b		151/152	F,Y		352	Y	TYR:352:A	0.402	4	-0.079, 0.797	5.4	b		102/103	F,Y
353	Q	GLN:353:A	-0.237	6	-0.442, -0.085	8.5	e		150/150	Q,P,S,A			353	Q	GLN:353:A	2.571	2	0.971, 4.598	4.1	e		47/47	P,Q,H		353	Q	GLN:353:A	0.945	4	0.433, 1.243	4.3	e		151/152	P,Q,H,A,L,S,K,T		353	Q	GLN:353:A	0.756	4	0.172, 1.155	5.3	e		102/103	K,P,T,S,A,Q,H
354	N	ASN:354:A	0.571	4	0.241, 0.834	5.4	e		150/150	N,G,H,S,K,D,M,A,E,Q,L			354	N	ASN:354:A	2.589	2	0.971, 4.598	4.1	e		47/47	G,N,H,K		354	N	ASN:354:A	-0.046	5	-0.365, 0.124	7.5	e		150/152	K,G,N,H,R,X		354	N	ASN:354:A	0.122	5	-0.178, 0.335	6.5	e		102/103	G,K,N,H
355	A	ALA:355:A	-0.529	8	-0.620, -0.498	9.8	b		150/150	A,G,S			355	A	ALA:355:A	-0.558	9	-0.713, -0.527	9.9	b	s	47/47	A		355	A	ALA:355:A	-0.933	9	-1.038, -0.874	9.9	b	s	151/152	A,G		355	A	ALA:355:A	-0.750	9	-0.852, -0.692	9.9	b	s	102/103	A,G
356	K	LYS:356:A	1.377	3	0.834, 1.405	4.3	e		150/150	K,Q,M,I,E,S,T,R,P,A			356	K	LYS:356:A	1.404	4	0.382, 2.251	5.3	e		47/47	M,K,Q		356	K	LYS:356:A	1.310	3	0.636, 1.789	4.3	e		151/152	K,T,M,Q,R,N,S,E		356	K	LYS:356:A	1.290	3	0.536, 1.727	4.3	e		102/103	K,T,N,S,E,Q,M
357	P	PRO:357:A	3.074	1	1.405, 3.077	3.1	e		150/150	P,A,K,E,T,V,R,L,S,Q			357	P	PRO:357:A	0.612	4	-0.293, 0.971	7.4	e		47/47	P,A		357	P	PRO:357:A	-0.304	6	-0.561, -0.106	7.5	e		151/152	P,I,A,E,Q		357	P	PRO:357:A	-0.338	7	-0.574, -0.178	8.6	e		102/103	E,A,Q,P
358	Y	TYR:358:A	-0.439	8	-0.586, -0.375	8.7	e	f	150/150	Y,R,F,L,W			358	Y	TYR:358:A	-0.504	9	-0.713, -0.482	9.9	e	f	47/47	Y		358	Y	TYR:358:A	0.429	4	0.002, 0.636	5.4	e		151/152	Y,I,T,F,K,A,S,R		358	Y	TYR:358:A	0.517	4	0.037, 0.797	5.4	e		102/103	T,F,K,A,S,R,Y
359	E	GLU:359:A	3.013	1	1.405, 3.077	3.1	e		150/150	E,Q,T,K,A,D,S,N,L,V,R,M			359	E	GLU:359:A	0.141	5*	-0.482, 0.382	9.5	e		47/47	E,Q		359	E	GLU:359:A	0.926	4	0.433, 1.243	4.3	e		151/152	E,Q,K,A,D,N,S,T		359	E	GLU:359:A	1.405	3	0.797, 1.727	4.3	e		102/103	K,A,D,N,S,T,Q,E
360	G	GLY:360:A	0.112	5	-0.201, 0.241	6.5	e		147/150	G,A,K,E,N,H,C,D			360	G	GLY:360:A	-0.455	8	-0.711, -0.430	9.8	e	f	47/47	G		360	G	GLY:360:A	0.020	5	-0.365, 0.266	7.5	e		151/152	G,A,E,T,D,Q		360	G	GLY:360:A	-0.514	8	-0.865, -0.410	9.7	e	f	48/103	G
361	E	GLU:361:A	0.564	4	0.241, 0.834	5.4	e		92/150	E,D,G,N,S,Q			361	E	GLU:361:A	-0.526	9	-0.713, -0.482	9.9	e	f	47/47	E		361	E	GLU:361:A	-0.737	8	-1.038, -0.616	9.8	e	f	48/152	E		361	E	GLU:361:A	-0.146	6	-0.410, 0.037	7.5	e		102/103	E,G,T,D,Q
362	N	ASN:362:A	1.031	3	0.485, 1.405	4.3	e		150/150	N,S,G,C,D,E,T,H,A			362	N	ASN:362:A	-0.568	9	-0.713, -0.564	9.9	e	f	47/47	N		362	N	ASN:362:A	0.507	4	0.124, 0.636	5.4	e		151/152	S,N,G,R,D,E		362	N	ASN:362:A	0.380	4	0.037, 0.536	5.4	e		102/103	D,S,N,E,G
363	L	LEU:363:A	-0.248	6	-0.442, -0.201	8.6	b		150/150	L,M,I			363	L	LEU:363:A	-0.518	9	-0.713, -0.482	9.9	b	s	47/47	L		363	L	LEU:363:A	-0.419	7	-0.667, -0.287	8.6	b		151/152	I,L,V,M		363	L	LEU:363:A	-0.391	7	-0.617, -0.266	8.6	b		102/103	L,M,I
364	M	MET:364:A	-0.039	5	-0.296, 0.059	7.5	b		150/150	M,L,I			364	M	MET:364:A	-0.595	9	-0.713, -0.595	9.9	b	s	47/47	M		364	M	MET:364:A	-0.737	8	-0.938, -0.616	9.8	b		151/152	L,M		364	M	MET:364:A	-0.565	8	-0.752, -0.470	9.7	b		102/103	L,M
365	F	PHE:365:A	1.284	3	0.834, 1.405	4.3	b		150/150	F,Y,E,L,H,T,V,C,A			365	F	PHE:365:A	1.737	3	0.382, 2.251	5.3	b		47/47	Y,F		365	F	PHE:365:A	1.727	3	0.893, 1.789	4.3	b		151/152	E,Y,F,L,V,I,S,G,T,K,H,A		365	F	PHE:365:A	2.843	1	1.155, 3.323	3.1	b		102/103	L,V,I,S,G,E,T,K,H,A,Y,F
366	E	GLU:366:A	-0.502	8	-0.620, -0.442	9.8	e	f	150/150	E,H,A,Q,T,K,S			366	E	GLU:366:A	-0.526	9	-0.713, -0.482	9.9	e	f	47/47	E		366	E	GLU:366:A	-0.189	6	-0.436, 0.002	7.5	e		151/152	A,V,E,I,H,G		366	E	GLU:366:A	-0.453	7	-0.656, -0.342	8.7	e		102/103	H,E,A,G
367	K	LYS:367:A	2.729	1	1.405, 3.077	3.1	e		150/150	K,E,P,Q,H,N,A,D,T			367	K	LYS:367:A	3.447	2	1.453, 4.598	4.1	e		47/47	P,Q,K		367	K	LYS:367:A	0.874	4	0.433, 1.243	4.3	e		151/152	D,P,Q,K,E		367	K	LYS:367:A	1.038	4	0.536, 1.155	4.3	e		102/103	P,Q,E,K,D
368	C	CYS:368:A	-0.691	9	-0.739, -0.674	9.9	b	s	150/150	C,V			368	C	CYS:368:A	0.124	5*	-0.482, 0.382	9.5	b		47/47	C,F		368	C	CYS:368:A	-0.068	5	-0.436, 0.124	7.5	b		151/152	C,F,T,A		368	C	CYS:368:A	0.153	5	-0.266, 0.335	6.5	b		102/103	C,T,A,F
369	D	ASP:369:A	-0.612	9	-0.695, -0.586	9.8	e	f	150/150	D,H,M,E			369	D	ASP:369:A	-0.529	9	-0.713, -0.527	9.9	e	f	47/47	D		369	D	ASP:369:A	-0.809	9	-0.967, -0.715	9.8	e	f	151/152	D,E		369	D	ASP:369:A	-0.618	8	-0.778, -0.525	9.8	e	f	102/103	D,E
370	I	ILE:370:A	-0.723	9	-0.756, -0.713	9.9	b	s	150/150	I,L,V			370	I	ILE:370:A	-0.585	9	-0.713, -0.564	9.9	b	s	47/47	I		370	I	ILE:370:A	-0.862	9	-0.993, -0.800	9.8	b	s	151/152	I,T,V		370	I	ILE:370:A	-0.762	9	-0.852, -0.724	9.9	b	s	102/103	I,V
371	F	PHE:371:A	-0.381	7	-0.545, -0.296	8.7	b		150/150	F,L,V			371	F	PHE:371:A	-0.521	9	-0.713, -0.482	9.9	b	s	47/47	F		371	F	PHE:371:A	-0.853	9	-1.017, -0.759	9.8	b	s	151/152	L,F		371	F	PHE:371:A	-0.677	9	-0.820, -0.617	9.8	b	s	102/103	L,F
372	I	ILE:372:A	-0.165	6	-0.375, -0.085	7.5	b		150/150	I,V,L			372	I	ILE:372:A	-0.123	6*	-0.527, 0.029	9.5	b		47/47	I,V		372	I	ILE:372:A	-0.528	7	-0.715, -0.436	8.7	b		151/152	I,V,S,M,L		372	I	ILE:372:A	-0.406	7	-0.617, -0.266	8.6	b		102/103	I,M,L,V
373	P	PRO:373:A	-0.603	9	-0.713, -0.545	9.8	b	s	150/150	P,L,K			373	P	PRO:373:A	-0.426	8	-0.711, -0.367	9.8	b		47/47	P		373	P	PRO:373:A	-0.502	7	-0.759, -0.365	8.7	b		151/152	P,L,T		373	P	PRO:373:A	-0.812	9	-0.894, -0.778	9.9	b	s	102/103	P
374	A	ALA:374:A	-0.675	9	-0.727, -0.650	9.9	b	s	149/150	A,C,X			374	A	ALA:374:A	-0.558	9	-0.713, -0.527	9.9	b	s	47/47	A		374	A	ALA:374:A	-0.881	9	-1.017, -0.800	9.8	b	s	151/152	A,C		374	A	ALA:374:A	-0.674	9	-0.820, -0.574	9.8	b	s	102/103	A,C
375	A	ALA:375:A	-0.737	9	-0.767, -0.727	9.9	e	f	150/150	A,S			375	A	ALA:375:A	-0.558	9	-0.713, -0.527	9.9	e	f	47/47	A		375	A	ALA:375:A	-0.933	9	-1.038, -0.874	9.9	e	f	151/152	A,S		375	A	ALA:375:A	-0.750	9	-0.852, -0.692	9.9	e	f	102/103	A,S
376	V	VAL:376:A	1.063	3	0.485, 1.405	4.3	e		150/150	V,L,I,T,G,S,M,A,K,N			376	V	VAL:376:A	0.893	4	0.029, 1.453	5.4	e		47/47	I,V		376	V	VAL:376:A	0.366	4	0.002, 0.636	5.4	e		151/152	S,R,G,I,V,T,N,M		376	V	VAL:376:A	-0.238	6	-0.470, -0.079	7.5	e		102/103	V,M,T,I
377	E	GLU:377:A	-0.764	9	-0.776, -0.762	9.9	e	f	150/150	E			377	E	GLU:377:A	-0.526	9	-0.713, -0.482	9.9	e	f	47/47	E		377	E	GLU:377:A	-0.874	9	-0.993, -0.800	9.8	e	f	151/152	E,Q,R		377	E	GLU:377:A	-0.686	9	-0.800, -0.617	9.8	e	f	102/103	E,Q,R
378	K	LYS:378:A	-0.385	7	-0.498, -0.296	8.7	e		150/150	K,Q,R			378	K	LYS:378:A	0.063	5*	-0.482, 0.382	9.5	e		47/47	Q,K		378	K	LYS:378:A	-0.845	9	-0.993, -0.759	9.8	e	f	152/152	K,Q,M		378	K	LYS:378:A	-0.655	8	-0.800, -0.574	9.8	e	f	103/103	K,M,Q
379	V	VAL:379:A	-0.238	6	-0.375, -0.201	7.6	b		150/150	V,A,T,I,Q,C,S			379	V	VAL:379:A	-0.580	9	-0.713, -0.564	9.9	b	s	47/47	V		379	V	VAL:379:A	-0.374	7	-0.616, -0.201	8.6	b		152/152	Q,V,E,P,S,T,A		379	V	VAL:379:A	-0.432	7	-0.617, -0.342	8.7	b		103/103	S,T,A,V
380	I	ILE:380:A	-0.637	9	-0.695, -0.586	9.8	b	s	150/150	I,L			380	I	ILE:380:A	-0.585	9	-0.713, -0.564	9.9	b	s	47/47	I		380	I	ILE:380:A	-0.714	8	-0.907, -0.616	9.8	b		152/152	L,I		380	I	ILE:380:A	-0.647	8	-0.778, -0.574	9.8	b		103/103	I,L
381	T	THR:381:A	0.010	5	-0.201, 0.059	6.5	e		150/150	T,N,H,R,D,K			381	T	THR:381:A	1.590	3	0.382, 2.251	5.3	e		47/47	T,N		381	T	THR:381:A	-0.499	7	-0.715, -0.365	8.7	e		152/152	T,N		381	T	THR:381:A	-0.279	6	-0.525, -0.178	8.6	e		103/103	N,T
382	S	SER:382:A	0.685	4	0.241, 0.834	5.4	e		150/150	S,K,N,A,M,Q,R,G,L,T,V,I			382	S	SER:382:A	0.432	5	-0.205, 0.971	7.4	e		47/47	S,A,N		382	S	SER:382:A	0.099	5	-0.201, 0.266	6.5	e		152/152	K,S,A,N,T,V		382	S	SER:382:A	0.035	5	-0.266, 0.172	6.5	e		103/103	S,A,T,N,V,K
383	E	GLU:383:A	3.077	1	1.405, 3.077	3.1	e		150/150	E,D,N,S,Q,A,K,G,H,T,L,F,R			383	E	GLU:383:A	0.878	4	-0.099, 1.453	6.4	e		47/47	E,D		383	E	GLU:383:A	0.481	4	0.124, 0.636	5.4	e		152/152	S,E,D,C,F,V		383	E	GLU:383:A	0.126	5	-0.178, 0.335	6.5	e		103/103	D,E
384	N	ASN:384:A	-0.739	9	-0.767, -0.727	9.9	e	f	150/150	N,V			384	N	ASN:384:A	-0.568	9	-0.713, -0.564	9.9	e	f	47/47	N		384	N	ASN:384:A	-0.896	9	-1.017, -0.838	9.9	e	f	152/152	N,S		384	N	ASN:384:A	-0.858	9	-0.896, -0.852	9.9	e	f	103/103	N
385	A	ALA:385:A	-0.737	9	-0.767, -0.727	9.9	b	s	150/150	A,C			385	A	ALA:385:A	-0.558	9	-0.713, -0.527	9.9	b	s	47/47	A		385	A	ALA:385:A	-0.564	7	-0.759, -0.436	8.7	b		151/152	A,X,T,S,G		385	A	ALA:385:A	-0.750	9	-0.852, -0.692	9.9	b	s	103/103	A,G
386	N	ASN:386:A	0.912	4	0.485, 0.834	4.4	e		150/150	N,S,H,G,P,D,C,A,R,E,Y,T			386	N	ASN:386:A	4.376	1	2.251, 4.598	3.1	e		47/47	N,G,H,S		386	N	ASN:386:A	3.254	1	1.789, 3.269	3.1	e		152/152	P,S,N,G,H,L,A,K,Q,E,D		386	N	ASN:386:A	3.286	1	1.727, 3.323	3.1	e		103/103	A,K,Q,N,G,S,E,D,H
387	R	ARG:387:A	1.084	3	0.485, 1.405	4.3	e		150/150	R,K,L,H,N,Q,M,D,E			387	R	ARG:387:A	2.104	3	0.634, 2.251	4.3	e		47/47	K,R		387	R	ARG:387:A	0.999	4	0.433, 1.243	4.3	e		152/152	R,K,N,S,D		387	R	ARG:387:A	0.887	4	0.335, 1.155	5.3	e		103/103	K,N,S,D,R
388	I	ILE:388:A	0.085	5	-0.201, 0.241	6.5	b		150/150	I,V,L,F			388	I	ILE:388:A	-0.126	6*	-0.527, 0.029	9.5	b		47/47	I,L		388	I	ILE:388:A	-0.106	5	-0.365, 0.124	7.5	b		152/152	V,I,L,A		388	I	ILE:388:A	-0.178	6	-0.410, 0.037	7.5	b		103/103	I,V,L
389	Q	GLN:389:A	0.069	5	-0.201, 0.241	6.5	e		150/150	Q,K,N,R			389	Q	GLN:389:A	1.021	4	0.186, 1.453	5.4	e		47/47	N,K,Q		389	Q	GLN:389:A	-0.414	7	-0.667, -0.287	8.6	e		152/152	K,N,Q,R		389	Q	GLN:389:A	-0.199	6	-0.470, -0.079	7.5	e		103/103	Q,K,R,N
390	A	ALA:390:A	-0.511	8	-0.620, -0.442	9.8	b		150/150	A,C,T			390	A	ALA:390:A	0.007	5*	-0.482, 0.382	9.5	b		47/47	A,C		390	A	ALA:390:A	-0.748	8	-0.907, -0.667	9.8	b		152/152	A,C,D,T		390	A	ALA:390:A	-0.750	9	-0.852, -0.692	9.9	b	s	103/103	A,C
391	K	LYS:391:A	-0.418	7	-0.545, -0.375	8.7	e		150/150	K,R			391	K	LYS:391:A	-0.545	9	-0.713, -0.527	9.9	e	f	47/47	K		391	K	LYS:391:A	-1.023	9	-1.085, -0.993	9.9	e	f	152/152	K		391	K	LYS:391:A	-0.848	9	-0.894, -0.837	9.9	e	f	103/103	K
392	I	ILE:392:A	-0.555	8	-0.650, -0.498	9.8	b		150/150	I,V,M,L			392	I	ILE:392:A	-0.585	9	-0.713, -0.564	9.9	b	s	47/47	I		392	I	ILE:392:A	-0.355	7	-0.616, -0.201	8.6	b		152/152	I,V,M,L,F		392	I	ILE:392:A	-0.303	7	-0.525, -0.178	8.6	b		103/103	I,M,L,F
393	I	ILE:393:A	-0.529	8	-0.620, -0.498	9.8	b		150/150	I,V,L			393	I	ILE:393:A	-0.585	9	-0.713, -0.564	9.9	b	s	47/47	I		393	I	ILE:393:A	-0.773	8	-0.938, -0.667	9.8	b		152/152	I,V,L		393	I	ILE:393:A	-0.759	9	-0.852, -0.724	9.9	b	s	103/103	I,L
394	A	ALA:394:A	-0.265	7	-0.442, -0.201	8.6	b		150/150	A,G,S,C			394	A	ALA:394:A	0.030	5*	-0.482, 0.382	9.5	b		47/47	A,G		394	A	ALA:394:A	-0.563	7	-0.800, -0.436	8.7	b		152/152	A,G,D,L		394	A	ALA:394:A	-0.576	8	-0.752, -0.470	9.7	b		103/103	A,L,G
395	E	GLU:395:A	-0.764	9	-0.776, -0.762	9.9	b	s	150/150	E			395	E	GLU:395:A	-0.526	9	-0.713, -0.482	9.9	b	s	47/47	E		395	E	GLU:395:A	-1.029	9	-1.085, -1.017	9.9	b	s	152/152	E		395	E	GLU:395:A	-0.852	9	-0.894, -0.837	9.9	b	s	103/103	E
396	A	ALA:396:A	-0.485	8	-0.586, -0.442	8.8	b		150/150	A,G			396	A	ALA:396:A	-0.558	9	-0.713, -0.527	9.9	b	s	47/47	A		396	A	ALA:396:A	-0.294	6	-0.616, -0.106	8.5	b		152/152	G,A,S,D		396	A	ALA:396:A	-0.635	8	-0.820, -0.525	9.8	b		103/103	G,A
397	A	ALA:397:A	-0.767	9	-0.776, -0.767	9.9	b	s	150/150	A			397	A	ALA:397:A	-0.558	9	-0.713, -0.527	9.9	b	s	47/47	A		397	A	ALA:397:A	-0.933	9	-1.038, -0.874	9.9	b	s	152/152	A,V		397	A	ALA:397:A	-0.848	9	-0.894, -0.837	9.9	b	s	103/103	A
398	N	ASN:398:A	-0.767	9	-0.776, -0.767	9.9	e	f	150/150	N			398	N	ASN:398:A	-0.568	9	-0.713, -0.564	9.9	e	f	47/47	N		398	N	ASN:398:A	-1.037	9	-1.085, -1.017	9.9	e	f	152/152	N		398	N	ASN:398:A	-0.858	9	-0.896, -0.852	9.9	e	f	103/103	N
399	G	GLY:399:A	-0.757	9	-0.775, -0.756	9.9	b	s	150/150	G			399	G	GLY:399:A	-0.455	8	-0.711, -0.430	9.8	b		47/47	G		399	G	GLY:399:A	-0.768	8	-0.967, -0.667	9.8	b		151/152	G,X,R		399	G	GLY:399:A	-0.796	9	-0.890, -0.752	9.9	b	s	103/103	G
400	P	PRO:400:A	-0.753	9	-0.775, -0.749	9.9	b	s	150/150	P			400	P	PRO:400:A	-0.426	8	-0.711, -0.367	9.8	b		47/47	P		400	P	PRO:400:A	-0.819	9	-0.993, -0.715	9.8	b	s	152/152	P,L		400	P	PRO:400:A	-0.812	9	-0.894, -0.778	9.9	b	s	103/103	P
401	T	THR:401:A	-0.342	7	-0.498, -0.296	8.7	b		150/150	T,I,L,V,C			401	T	THR:401:A	-0.572	9	-0.713, -0.564	9.9	b	s	47/47	T		401	T	THR:401:A	-0.574	7	-0.759, -0.436	8.7	b		152/152	T,I,K,S,V		401	T	THR:401:A	-0.558	8	-0.724, -0.470	9.7	b		103/103	T,S,V,I
402	T	THR:402:A	-0.768	9	-0.776, -0.767	9.9	b	s	150/150	T			402	T	THR:402:A	-0.572	9	-0.713, -0.564	9.9	b	s	47/47	T		402	T	THR:402:A	-1.025	9	-1.085, -0.993	9.9	b	s	152/152	T		402	T	THR:402:A	-0.849	9	-0.894, -0.837	9.9	b	s	103/103	T
403	P	PRO:403:A	-0.096	6	-0.296, 0.059	7.5	b		150/150	P,L,M,I,G,V,A			403	P	PRO:403:A	-0.426	8	-0.711, -0.367	9.8	b		47/47	P		403	P	PRO:403:A	-0.975	9	-1.085, -0.938	9.9	b	s	152/152	P		403	P	PRO:403:A	-0.812	9	-0.894, -0.778	9.9	b	s	103/103	P
404	A	ALA:404:A	-0.014	5	-0.201, 0.059	6.5	b		150/150	A,E,S,D,L,G,K			404	A	ALA:404:A	-0.558	9	-0.713, -0.527	9.9	b	s	47/47	A		404	A	ALA:404:A	-0.577	8	-0.759, -0.436	8.7	b		152/152	E,A,S		404	A	ALA:404:A	-0.453	7	-0.656, -0.342	8.7	b		103/103	A,S
405	A	ALA:405:A	-0.676	9	-0.727, -0.650	9.9	b	s	150/150	A,G			405	A	ALA:405:A	-0.558	9	-0.713, -0.527	9.9	b	s	47/47	A		405	A	ALA:405:A	-0.500	7	-0.715, -0.365	8.7	b		152/152	A,T,G		405	A	ALA:405:A	-0.494	8	-0.692, -0.410	9.7	b		103/103	A,G
406	D	ASP:406:A	-0.607	9	-0.695, -0.545	9.8	b	s	150/150	D,Y,E,Q			406	D	ASP:406:A	-0.529	9	-0.713, -0.527	9.9	b	s	47/47	D		406	D	ASP:406:A	-0.823	9	-0.967, -0.759	9.8	b	s	152/152	D,G,E		406	D	ASP:406:A	-0.739	9	-0.852, -0.692	9.9	b	s	103/103	D,E
407	K	LYS:407:A	0.589	4	0.241, 0.834	5.4	e		150/150	K,A,T,Q,L,S,E,R,I,V,N			407	K	LYS:407:A	1.335	4	0.186, 2.251	5.3	e		47/47	K,R,Q		407	K	LYS:407:A	0.230	5	-0.106, 0.433	5.4	e		152/152	K,R,Q,E,A,I		407	K	LYS:407:A	0.448	4	0.037, 0.797	5.4	e		103/103	A,R,K,E,Q,I
408	I	ILE:408:A	-0.366	7	-0.498, -0.296	8.7	e		150/150	I,V,L,H			408	I	ILE:408:A	-0.585	9	-0.713, -0.564	9.9	e	f	47/47	I		408	I	ILE:408:A	-0.709	8	-0.874, -0.616	9.8	e	f	152/152	I,V		408	I	ILE:408:A	-0.672	9	-0.800, -0.617	9.8	e	f	103/103	I,V
409	L	LEU:409:A	-0.555	8	-0.650, -0.498	9.8	b		150/150	L,F			409	L	LEU:409:A	0.934	4	0.029, 1.453	5.4	b		47/47	L,R		409	L	LEU:409:A	-0.454	7	-0.715, -0.287	8.6	b		152/152	F,L,R,S		409	L	LEU:409:A	-0.534	8	-0.724, -0.410	9.7	b		103/103	L,R
410	I	ILE:410:A	0.594	4	0.241, 0.834	5.4	e		150/150	I,L,V,Q,M,R,K,H			410	I	ILE:410:A	-0.585	9	-0.713, -0.564	9.9	e	f	47/47	I		410	I	ILE:410:A	-0.241	6	-0.561, 0.002	7.5	e		152/152	L,I,Q,R		410	I	ILE:410:A	-0.270	6	-0.525, -0.079	8.5	e		103/103	Q,R,L,I
411	D	ASP:411:A	1.359	3	0.834, 1.405	4.3	e		150/150	D,E,Q,K,S,A,G,N			411	D	ASP:411:A	3.135	2	1.453, 4.598	4.1	e		47/47	D,E		411	D	ASP:411:A	1.019	4	0.433, 1.243	4.3	e		152/152	E,D,K,G,A,S		411	D	ASP:411:A	1.029	4	0.536, 1.155	4.3	e		103/103	S,E,D,K,G
412	R	ARG:412:A	0.770	4	0.241, 0.834	5.4	e		150/150	R,K,N,M,Q,A,S			412	R	ARG:412:A	-0.532	9	-0.713, -0.527	9.9	e	f	47/47	R		412	R	ARG:412:A	-0.414	7	-0.667, -0.287	8.6	e		152/152	R,K,G,N		412	R	ARG:412:A	-0.526	8	-0.692, -0.410	9.7	e	f	103/103	R,K,N
413	N	ASN:413:A	-0.237	6	-0.375, -0.201	7.6	e		150/150	N,K,S,G,D,E			413	N	ASN:413:A	-0.047	5*	-0.527, 0.186	9.5	e		47/47	N,K		413	N	ASN:413:A	-0.069	5	-0.365, 0.124	7.5	e		152/152	N,K,R,G		413	N	ASN:413:A	0.386	4	-0.079, 0.536	5.4	e		103/103	K,R,N,G
414	I	ILE:414:A	0.341	5	0.059, 0.485	5.4	b		150/150	I,V,K,C,Q,M,R			414	I	ILE:414:A	-0.585	9	-0.713, -0.564	9.9	b	s	47/47	I		414	I	ILE:414:A	-0.435	7	-0.667, -0.287	8.6	b		150/152	I,V,A		414	I	ILE:414:A	-0.240	6	-0.470, -0.079	7.5	b		103/103	I,V,A
415	L	LEU:415:A	-0.312	7	-0.442, -0.201	8.6	b		150/150	L,M			415	L	LEU:415:A	-0.518	9	-0.713, -0.482	9.9	b	s	47/47	L		415	L	LEU:415:A	-0.388	7	-0.667, -0.201	8.6	b		152/152	M,L,V,I		415	L	LEU:415:A	-0.824	9	-0.894, -0.800	9.9	b	s	103/103	L
416	V	VAL:416:A	-0.437	8	-0.545, -0.375	8.7	b		150/150	V,I,A			416	V	VAL:416:A	-0.580	9	-0.713, -0.564	9.9	b	s	47/47	V		416	V	VAL:416:A	-0.141	6	-0.436, 0.002	7.5	b		152/152	V,F,I,L,M		416	V	VAL:416:A	0.006	5	-0.266, 0.172	6.5	b		103/103	V,I,L,M
417	I	ILE:417:A	-0.496	8	-0.586, -0.442	8.8	b		150/150	I,V,L,F			417	I	ILE:417:A	-0.585	9	-0.713, -0.564	9.9	b	s	47/47	I		417	I	ILE:417:A	-0.501	7	-0.715, -0.365	8.7	b		152/152	I,V,L		417	I	ILE:417:A	-0.464	7	-0.656, -0.342	8.7	b		103/103	I,V,L
418	P	PRO:418:A	-0.753	9	-0.775, -0.749	9.9	b	s	150/150	P			418	P	PRO:418:A	-0.426	8	-0.711, -0.367	9.8	b		47/47	P		418	P	PRO:418:A	-0.662	8	-0.874, -0.501	9.7	b		152/152	P,L		418	P	PRO:418:A	-0.812	9	-0.894, -0.778	9.9	b	s	103/103	P
419	D	ASP:419:A	-0.764	9	-0.776, -0.762	9.9	b	s	150/150	D			419	D	ASP:419:A	-0.529	9	-0.713, -0.527	9.9	b	s	47/47	D		419	D	ASP:419:A	-1.015	9	-1.085, -0.993	9.9	b	s	152/152	D		419	D	ASP:419:A	-0.842	9	-0.894, -0.820	9.9	b	s	103/103	D
420	L	LEU:420:A	-0.349	7	-0.498, -0.296	8.7	b		150/150	L,M,I			420	L	LEU:420:A	-0.518	9	-0.713, -0.482	9.9	b	s	47/47	L		420	L	LEU:420:A	-0.182	6	-0.501, 0.002	7.5	b		152/152	L,V,M,I,F		420	L	LEU:420:A	-0.107	6	-0.410, 0.037	7.5	b		103/103	L,M,I,F
421	Y	TYR:421:A	-0.398	7	-0.545, -0.296	8.7	b		150/150	Y,F			421	Y	TYR:421:A	-0.504	9	-0.713, -0.482	9.9	b	s	47/47	Y		421	Y	TYR:421:A	-0.320	6	-0.616, -0.106	8.5	b		152/152	Y,D,F		421	Y	TYR:421:A	-0.243	6	-0.525, -0.079	8.5	b		103/103	Y,F
422	I	ILE:422:A	0.112	5	-0.085, 0.241	5.5	b		150/150	I,V,C,L			422	I	ILE:422:A	-0.585	9	-0.713, -0.564	9.9	b	s	47/47	I		422	I	ILE:422:A	-0.650	8	-0.874, -0.501	9.7	b		151/152	L,I,C		422	I	ILE:422:A	-0.601	8	-0.800, -0.470	9.7	b		103/103	C,I
423	N	ASN:423:A	-0.767	9	-0.776, -0.767	9.9	b	s	150/150	N			423	N	ASN:423:A	-0.568	9	-0.713, -0.564	9.9	b	s	47/47	N		423	N	ASN:423:A	-1.037	9	-1.085, -1.017	9.9	b	s	151/152	N		423	N	ASN:423:A	-0.858	9	-0.896, -0.852	9.9	b	s	103/103	N
424	A	ALA:424:A	-0.737	9	-0.767, -0.727	9.9	b	s	150/150	A,G			424	A	ALA:424:A	-0.558	9	-0.713, -0.527	9.9	b	s	47/47	A		424	A	ALA:424:A	-0.932	9	-1.038, -0.874	9.9	b	s	151/152	A,T,X		424	A	ALA:424:A	-0.848	9	-0.894, -0.837	9.9	b	s	103/103	A
425	G	GLY:425:A	-0.757	9	-0.775, -0.756	9.9	b	s	150/150	G			425	G	GLY:425:A	-0.455	8	-0.711, -0.430	9.8	b		47/47	G		425	G	GLY:425:A	-0.954	9	-1.073, -0.907	9.9	b	s	152/152	G		425	G	GLY:425:A	-0.796	9	-0.890, -0.752	9.9	b	s	103/103	G
426	G	GLY:426:A	-0.757	9	-0.775, -0.756	9.9	e	f	150/150	G			426	G	GLY:426:A	-0.455	8	-0.711, -0.430	9.8	e	f	47/47	G		426	G	GLY:426:A	-0.954	9	-1.073, -0.907	9.9	e	f	152/152	G		426	G	GLY:426:A	-0.796	9	-0.890, -0.752	9.9	e	f	103/103	G
427	V	VAL:427:A	-0.768	9	-0.776, -0.767	9.9	b	s	150/150	V			427	V	VAL:427:A	-0.580	9	-0.713, -0.564	9.9	b	s	47/47	V		427	V	VAL:427:A	-0.739	8	-0.907, -0.616	9.8	b		152/152	V,A		427	V	VAL:427:A	-0.539	8	-0.724, -0.410	9.7	b		103/103	V,A
428	T	THR:428:A	-0.742	9	-0.767, -0.727	9.9	b	s	150/150	T,V			428	T	THR:428:A	-0.572	9	-0.713, -0.564	9.9	b	s	47/47	T		428	T	THR:428:A	-0.937	9	-1.038, -0.874	9.9	b	s	150/152	T,I		428	T	THR:428:A	-0.849	9	-0.894, -0.837	9.9	b	s	103/103	T
429	V	VAL:429:A	-0.768	9	-0.776, -0.767	9.9	b	s	150/150	V			429	V	VAL:429:A	-0.580	9	-0.713, -0.564	9.9	b	s	47/47	V		429	V	VAL:429:A	-0.928	9	-1.038, -0.874	9.9	b	s	152/152	V,A		429	V	VAL:429:A	-0.744	9	-0.852, -0.692	9.9	b	s	103/103	A,V
430	S	SER:430:A	-0.769	9	-0.776, -0.767	9.9	b	s	150/150	S			430	S	SER:430:A	-0.587	9	-0.713, -0.564	9.9	b	s	47/47	S		430	S	SER:430:A	-0.961	9	-1.057, -0.907	9.9	b	s	152/152	S,L		430	S	SER:430:A	-0.857	9	-0.896, -0.837	9.9	b	s	103/103	S
431	F	PHE:431:A	-0.456	8	-0.586, -0.375	8.7	e	f	150/150	F,Y			431	F	PHE:431:A	-0.521	9	-0.713, -0.482	9.9	e	f	47/47	F		431	F	PHE:431:A	-0.853	9	-1.017, -0.759	9.8	e	f	152/152	Y,F		431	F	PHE:431:A	-0.679	9	-0.820, -0.617	9.8	e	f	103/103	Y,F
432	F	PHE:432:A	-0.764	9	-0.776, -0.762	9.9	b	s	150/150	F			432	F	PHE:432:A	-0.521	9	-0.713, -0.482	9.9	b	s	47/47	F		432	F	PHE:432:A	-0.990	9	-1.085, -0.967	9.9	b	s	152/152	F		432	F	PHE:432:A	-0.823	9	-0.894, -0.800	9.9	b	s	103/103	F
433	E	GLU:433:A	-0.764	9	-0.776, -0.762	9.9	b	s	150/150	E			433	E	GLU:433:A	0.157	5*	-0.482, 0.382	9.5	b		47/47	E,V		433	E	GLU:433:A	-0.947	9	-1.038, -0.907	9.9	b	s	152/152	E,V		433	E	GLU:433:A	-0.763	9	-0.852, -0.724	9.9	b	s	103/103	E,V
434	W	TRP:434:A	-0.754	9	-0.775, -0.749	9.9	b	s	150/150	W			434	W	TRP:434:A	-0.436	8	-0.711, -0.430	9.8	b		47/47	W		434	W	TRP:434:A	-0.664	8	-0.874, -0.501	9.7	b		152/152	W,Y,F		434	W	TRP:434:A	-0.498	8	-0.724, -0.342	9.7	b		103/103	Y,F,W
435	L	LEU:435:A	-0.722	9	-0.762, -0.695	9.9	e	f	150/150	L,V			435	L	LEU:435:A	-0.518	9	-0.713, -0.482	9.9	e	f	47/47	L		435	L	LEU:435:A	-0.992	9	-1.085, -0.967	9.9	e	f	152/152	L		435	L	LEU:435:A	-0.824	9	-0.894, -0.800	9.9	e	f	103/103	L
436	K	LYS:436:A	-0.766	9	-0.776, -0.762	9.9	b	s	150/150	K			436	K	LYS:436:A	-0.545	9	-0.713, -0.527	9.9	b	s	47/47	K		436	K	LYS:436:A	-0.934	9	-1.038, -0.874	9.9	b	s	152/152	K,T		436	K	LYS:436:A	-0.751	9	-0.852, -0.692	9.9	b	s	103/103	K,T
437	N	ASN:437:A	-0.712	9	-0.749, -0.695	9.9	b	s	150/150	N,D			437	N	ASN:437:A	-0.568	9	-0.713, -0.564	9.9	b	s	47/47	N		437	N	ASN:437:A	-1.037	9	-1.085, -1.017	9.9	b	s	152/152	N		437	N	ASN:437:A	-0.858	9	-0.896, -0.852	9.9	b	s	103/103	N
438	L	LEU:438:A	-0.687	9	-0.739, -0.650	9.9	e	f	150/150	L,I			438	L	LEU:438:A	-0.518	9	-0.713, -0.482	9.9	e	f	47/47	L		438	L	LEU:438:A	-0.623	8	-0.800, -0.501	8.7	e	f	152/152	L,I		438	L	LEU:438:A	-0.552	8	-0.724, -0.470	9.7	e	f	103/103	I,L
439	N	ASN:439:A	-0.657	9	-0.713, -0.620	9.9	e	f	150/150	N,E,S			439	N	ASN:439:A	-0.568	9	-0.713, -0.564	9.9	e	f	47/47	N		439	N	ASN:439:A	-1.037	9	-1.085, -1.017	9.9	e	f	152/152	N		439	N	ASN:439:A	-0.858	9	-0.896, -0.852	9.9	e	f	103/103	N
440	H	HIS:440:A	-0.737	9	-0.767, -0.727	9.9	e	f	150/150	H,D			440	H	HIS:440:A	-0.559	9	-0.713, -0.527	9.9	e	f	47/47	H		440	H	HIS:440:A	-1.015	9	-1.085, -0.993	9.9	e	f	152/152	H		440	H	HIS:440:A	-0.842	9	-0.894, -0.820	9.9	e	f	103/103	H
441	V	VAL:441:A	-0.694	9	-0.739, -0.674	9.9	e	f	150/150	V,T,I,S			441	V	VAL:441:A	-0.580	9	-0.713, -0.564	9.9	e	f	47/47	V		441	V	VAL:441:A	-0.829	9	-0.967, -0.759	9.8	e	f	152/152	V,D,I		441	V	VAL:441:A	-0.742	9	-0.852, -0.692	9.9	e	f	103/103	I,V
442	S	SER:442:A	-0.769	9	-0.776, -0.767	9.9	e	f	150/150	S			442	S	SER:442:A	-0.587	9	-0.713, -0.564	9.9	e	f	47/47	S		442	S	SER:442:A	-0.884	9	-0.993, -0.838	9.9	e	f	152/152	S,R,T		442	S	SER:442:A	-0.773	9	-0.865, -0.724	9.9	e	f	103/103	S,T
443	Y	TYR:443:A	-0.627	9	-0.713, -0.586	9.8	e	f	150/150	Y,F			443	Y	TYR:443:A	-0.504	9	-0.713, -0.482	9.9	e	f	47/47	Y		443	Y	TYR:443:A	-0.446	7	-0.715, -0.287	8.6	e		152/152	Y,F		443	Y	TYR:443:A	-0.523	8	-0.724, -0.410	9.7	e	f	103/103	F,Y
444	G	GLY:444:A	-0.757	9	-0.775, -0.756	9.9	b	s	150/150	G			444	G	GLY:444:A	-0.455	8	-0.711, -0.430	9.8	b		47/47	G		444	G	GLY:444:A	-0.954	9	-1.073, -0.907	9.9	b	s	152/152	G		444	G	GLY:444:A	-0.796	9	-0.890, -0.752	9.9	b	s	103/103	G
445	R	ARG:445:A	-0.728	9	-0.762, -0.713	9.9	e	f	150/150	R,K			445	R	ARG:445:A	-0.532	9	-0.713, -0.527	9.9	e	f	47/47	R		445	R	ARG:445:A	-0.534	7	-0.759, -0.365	8.7	e		152/152	R,H,K		445	R	ARG:445:A	-0.646	8	-0.778, -0.574	9.8	e	f	103/103	K,R
446	L	LEU:446:A	-0.763	9	-0.776, -0.762	9.9	e	f	150/150	L			446	L	LEU:446:A	-0.518	9	-0.713, -0.482	9.9	e	f	47/47	L		446	L	LEU:446:A	-0.711	8	-0.874, -0.616	9.8	e	f	152/152	L,M		446	L	LEU:446:A	-0.543	8	-0.724, -0.410	9.7	e	f	103/103	L,M
447	T	THR:447:A	-0.685	9	-0.739, -0.650	9.9	e	f	150/150	T,L,S			447	T	THR:447:A	-0.572	9	-0.713, -0.564	9.9	e	f	47/47	T		447	T	THR:447:A	0.089	5	-0.201, 0.266	6.5	e		152/152	T,I,S,N,H		447	T	THR:447:A	0.054	5	-0.266, 0.172	6.5	e		103/103	S,N,H,T
448	F	PHE:448:A	-0.764	9	-0.776, -0.762	9.9	e	f	150/150	F			448	F	PHE:448:A	-0.521	9	-0.713, -0.482	9.9	e	f	47/47	F		448	F	PHE:448:A	0.225	5	-0.106, 0.433	5.4	e		152/152	F,I,V,S,L,A,T		448	F	PHE:448:A	0.195	5	-0.178, 0.335	6.5	e		103/103	F,V,S,L,A,I,T
449	K	LYS:449:A	-0.733	9	-0.767, -0.713	9.9	e	f	150/150	K,R			449	K	LYS:449:A	-0.545	9	-0.713, -0.527	9.9	e	f	47/47	K		449	K	LYS:449:A	-0.543	7	-0.759, -0.436	8.7	e		152/152	K,R,G		449	K	LYS:449:A	-0.420	7	-0.617, -0.266	8.6	e		103/103	R,K,G
450	Y	TYR:450:A	-0.717	9	-0.762, -0.695	9.9	e	f	150/150	Y,W			450	Y	TYR:450:A	-0.504	9	-0.713, -0.482	9.9	e	f	47/47	Y		450	Y	TYR:450:A	0.121	5	-0.201, 0.266	6.5	e		152/152	Y,Q,H,R,T,S,I,K		450	Y	TYR:450:A	0.206	5	-0.178, 0.335	6.5	e		103/103	Q,H,R,T,S,I,K,Y
451	E	GLU:451:A	-0.689	9	-0.739, -0.650	9.9	e	f	150/150	E,D,Q			451	E	GLU:451:A	-0.526	9	-0.713, -0.482	9.9	e	f	47/47	E		451	E	GLU:451:A	-0.555	7	-0.759, -0.436	8.7	e		152/152	E,T,S,I,D		451	E	GLU:451:A	-0.238	6	-0.470, -0.079	7.5	e		103/103	E,T,S,I,D
452	R	ARG:452:A	-0.158	6	-0.375, -0.085	7.5	e		149/150	R,K,E			452	R	ARG:452:A	-0.532	9	-0.713, -0.527	9.9	e	f	47/47	R		452	R	ARG:452:A	0.034	5	-0.287, 0.266	6.5	e		152/152	R,T,W,S,A,K,N,Q		452	R	ARG:452:A	0.089	5	-0.266, 0.335	6.5	e		103/103	S,A,K,N,Q,R
453	E	GLU:453:A	-0.200	6	-0.375, -0.085	7.5	e		149/150	E,D			453	E	GLU:453:A	-0.526	9	-0.713, -0.482	9.9	e	f	47/47	E		453	E	GLU:453:A	0.466	4	0.124, 0.636	5.4	e		152/152	D,E,V,Q,H,S,A,T,N,L		453	E	GLU:453:A	0.391	4	0.037, 0.536	5.4	e		103/103	Q,H,S,A,E,T,N,L
454	S	SER:454:A	-0.675	9	-0.727, -0.650	9.9	e	f	149/150	S,T,A			454	S	SER:454:A	-0.587	9	-0.713, -0.564	9.9	e	f	47/47	S		454	S	SER:454:A	-0.205	6	-0.501, 0.002	7.5	e		152/152	S,N,I,M,L,T,V		454	S	SER:454:A	0.131	5	-0.178, 0.335	6.5	e		103/103	N,I,M,L,T,V,S
455	N	ASN:455:A	-0.767	9	-0.776, -0.767	9.9	e	f	149/150	N			455	N	ASN:455:A	-0.568	9	-0.713, -0.564	9.9	e	f	47/47	N		455	N	ASN:455:A	-0.688	8	-0.874, -0.561	9.7	e	f	152/152	N,T,L,I,V		455	N	ASN:455:A	-0.546	8	-0.724, -0.470	9.7	e	f	103/103	L,I,V,N
456	Y	TYR:456:A	-0.088	6	-0.296, 0.059	7.5	e		149/150	Y,L,H,Q,K,T,R			456	Y	TYR:456:A	-0.504	9	-0.713, -0.482	9.9	e	f	47/47	Y		456	Y	TYR:456:A	0.645	4	0.124, 0.893	5.4	e		152/152	Y,R,N,S,K,I,T,L,H,F		456	Y	TYR:456:A	0.873	4	0.335, 1.155	5.3	e		103/103	R,N,S,K,I,T,L,H,F,Y
457	H	HIS:457:A	-0.328	7	-0.498, -0.296	8.7	e		149/150	H,Q,Y,F,S,D,A,L			457	H	HIS:457:A	-0.559	9	-0.713, -0.527	9.9	e	f	47/47	H		457	H	HIS:457:A	-0.260	6	-0.501, -0.106	7.5	e		152/152	H,N,Q,R,E,G,A		457	H	HIS:457:A	-0.440	7	-0.656, -0.342	8.7	e		103/103	E,Q,G,A,H
458	L	LEU:458:A	-0.763	9	-0.776, -0.762	9.9	e	f	149/150	L			458	L	LEU:458:A	-0.518	9	-0.713, -0.482	9.9	e	f	47/47	L		458	L	LEU:458:A	0.195	5	-0.201, 0.433	6.4	e		152/152	L,F,V,I,T,M		458	L	LEU:458:A	0.268	5	-0.079, 0.536	5.4	e		103/103	V,I,T,L,M
459	L	LEU:459:A	-0.723	9	-0.762, -0.695	9.9	e	f	149/150	L,F			459	L	LEU:459:A	-0.518	9	-0.713, -0.482	9.9	e	f	47/47	L		459	L	LEU:459:A	0.849	4	0.266, 1.243	5.3	e		152/152	L,F,M,I,V,T		459	L	LEU:459:A	1.186	3	0.536, 1.727	4.3	e		103/103	L,F,M,I,V,T
460	A	ALA:460:A	0.044	5	-0.545, 0.241	8.5	e		6/150	A,E			460	A	ALA:460:A	1.852	3	0.382, 2.251	5.3	e		41/47	E,A,D		460	A	ALA:460:A	0.379	4	-0.501, 0.893	7.4	e		28/152	A,D		460	A	ALA:460:A	0.429	4	-0.410, 0.797	7.4	e		28/103	A,D
461	S	SER:461:A	-0.116	6	-0.586, 0.059	8.5	e		6/150	S,N			461	S	SER:461:A	-0.572	9	-0.713, -0.564	9.9	e	f	41/47	S		461	S	SER:461:A	-0.522	7	-0.993, -0.287	9.6	e		28/152	S		461	S	SER:461:A	-0.505	8	-0.865, -0.410	9.7	e	f	28/103	S
462	V	VAL:462:A	0.236	5*	-0.442, 0.485	8.4	e		6/150	V,I			462	V	VAL:462:A	-0.032	5*	-0.527, 0.186	9.5	e		41/47	V,I		462	V	VAL:462:A	-0.477	7	-0.993, -0.287	9.6	e		28/152	V		462	V	VAL:462:A	-0.466	7	-0.865, -0.342	9.7	e		28/103	V
463	Q	GLN:463:A	0.317	5*	-0.442, 0.834	8.4	e		5/150	Q,E			463	Q	GLN:463:A	-0.558	9	-0.713, -0.527	9.9	e	f	41/47	Q		463	Q	GLN:463:A	-0.520	7	-0.993, -0.287	9.6	e		28/152	Q		463	Q	GLN:463:A	-0.504	8	-0.865, -0.410	9.7	e	f	28/103	Q
464	Q	GLN:464:A	1.197	3	0.059, 1.405	5.3	e		6/150	Q,E,Y			464	Q	GLN:464:A	1.500	4	0.382, 2.251	5.3	e		41/47	A,R,Q		464	Q	GLN:464:A	-0.520	7	-0.993, -0.287	9.6	e		28/152	Q		464	Q	GLN:464:A	-0.504	8	-0.865, -0.410	9.7	e	f	28/103	Q
465	S	SER:465:A	-0.047	5	-0.545, 0.241	8.5	e		6/150	S,F			465	S	SER:465:A	-0.572	9	-0.713, -0.564	9.9	e	f	41/47	S		465	S	SER:465:A	-0.522	7	-0.993, -0.287	9.6	e		28/152	S		465	S	SER:465:A	-0.505	8	-0.865, -0.410	9.7	e	f	28/103	S
466	I	ILE:466:A	0.413	4*	-0.442, 0.834	8.4	e		6/150	I,L			466	I	ILE:466:A	0.103	5*	-0.482, 0.382	9.5	e		41/47	L,I		466	I	ILE:466:A	-0.499	7	-0.993, -0.287	9.6	e		28/152	I		466	I	ILE:466:A	-0.486	8	-0.865, -0.342	9.7	e	f	28/103	I
467	E	GLU:467:A	1.545	3*	0.241, 3.077	5.1	e		6/150	E,N,H			467	E	GLU:467:A	-0.508	9	-0.713, -0.482	9.9	e	f	41/47	E		467	E	GLU:467:A	-0.500	7	-0.993, -0.287	9.6	e		28/152	E		467	E	GLU:467:A	-0.486	8	-0.865, -0.342	9.7	e	f	28/103	E
468	R	ARG:468:A	1.852	2	0.485, 3.077	4.1	e		6/150	R,K,N,H			468	R	ARG:468:A	-0.493	9	-0.711, -0.482	9.9	e	f	37/47	R		468	R	ARG:468:A	-0.461	7	-0.993, -0.201	9.6	e		28/152	R		468	R	ARG:468:A	-0.450	7	-0.865, -0.342	9.7	e		28/103	R
469	I	ILE:469:A	1.500	3*	0.241, 3.077	5.1	e		6/150	I,A,F			469	I	ILE:469:A	3.835	1	1.453, 4.598	4.1	e		37/47	A,F,V,I		469	I	ILE:469:A	1.961	2	0.636, 3.269	4.1	e		28/152	F,V,I		469	I	ILE:469:A	2.114	2	0.797, 3.323	4.1	e		28/103	F,V,I
470	I	ILE:470:A	0.918	4	-0.085, 1.405	5.3	e		6/150	I,L,V			470	I	ILE:470:A	1.296	4	0.186, 2.251	5.3	e		37/47	I,V		470	I	ILE:470:A	1.155	3	0.002, 1.789	5.3	e		28/152	V,I		470	I	ILE:470:A	1.234	3	0.037, 1.727	5.3	e		28/103	V,I
471	N	ASN:471:A	1.950	2	0.485, 3.077	4.1	e		6/150	N,S,G,F			471	N	ASN:471:A	3.338	2	1.453, 4.598	4.1	e		37/47	M,F,L,N		471	N	ASN:471:A	2.024	2	0.636, 3.269	4.1	e		28/152	L,M,N		471	N	ASN:471:A	2.194	2	0.797, 3.323	4.1	e		28/103	L,M,N
472	D	ASP:472:A	0.971	4	-0.085, 1.405	5.3	e		6/150	D,E,S			472	D	ASP:472:A	-0.481	9	-0.711, -0.430	9.8	e	f	33/47	D		472	D	ASP:472:A	-0.463	7	-0.993, -0.201	9.6	e		28/152	D		472	D	ASP:472:A	-0.452	7	-0.865, -0.342	9.7	e		28/103	D
473	E	GLU:473:A	-0.032	5	-0.201, 0.059	6.5	e		149/150	E,K,A,Q,M,D,X,N,G,H			473	E	GLU:473:A	2.771	2	0.971, 4.598	4.1	e		42/47	Q,K,E		473	E	GLU:473:A	0.284	5	-0.106, 0.433	5.4	e		151/152	M,E,A,V,R,L,K,T,S,N,D		473	E	GLU:473:A	0.072	5	-0.266, 0.335	6.5	e		102/103	K,R,A,T,S,N,D,E
474	S	SER:474:A	-0.769	9	-0.776, -0.767	9.9	e	f	150/150	S			474	S	SER:474:A	-0.569	9	-0.713, -0.564	9.9	e	f	42/47	S		474	S	SER:474:A	-0.962	9	-1.057, -0.907	9.9	e	f	151/152	S,T		474	S	SER:474:A	-0.777	9	-0.865, -0.724	9.9	e	f	102/103	S,T
475	V	VAL:475:A	-0.744	9	-0.767, -0.727	9.9	e	f	150/150	V,I			475	V	VAL:475:A	-0.543	9	-0.713, -0.527	9.9	e	f	41/47	V		475	V	VAL:475:A	-0.571	7	-0.759, -0.436	8.7	e		151/152	V,I,L,M		475	V	VAL:475:A	-0.361	7	-0.574, -0.266	8.6	e		102/103	V,I,L,M
476	Q	GLN:476:A	-0.716	9	-0.756, -0.695	9.9	e	f	150/150	Q,E			476	Q	GLN:476:A	-0.536	9	-0.713, -0.527	9.9	e	f	41/47	Q		476	Q	GLN:476:A	-0.661	8	-0.838, -0.561	9.7	e	f	151/152	Q,P,E,N,G,S		476	Q	GLN:476:A	-0.533	8	-0.692, -0.410	9.7	e	f	102/103	E,Q,N,G,S
477	E	GLU:477:A	0.122	5	-0.085, 0.241	5.5	e		149/150	E,Q,A,D,X,N,K,S,G,R,H			477	E	GLU:477:A	0.320	5*	-0.430, 0.634	8.4	e		41/47	A,E		477	E	GLU:477:A	0.231	5	-0.106, 0.433	5.4	e		151/152	E,A,R,Q,D,S,T,K,G		477	E	GLU:477:A	0.570	4	0.172, 0.797	5.4	e		102/103	E,D,S,Q,T,K,G,A,R
478	S	SER:478:A	-0.769	9	-0.776, -0.767	9.9	e	f	149/150	S,X			478	S	SER:478:A	-0.552	9	-0.713, -0.527	9.9	e	f	41/47	S		478	S	SER:478:A	-0.654	8	-0.838, -0.561	9.7	e	f	151/152	S,C,G,A,D		478	S	SER:478:A	-0.439	7	-0.617, -0.342	8.7	e		102/103	S,C,G,A,D
479	L	LEU:479:A	-0.640	9	-0.713, -0.586	9.8	e	f	149/150	L,X,V,M,I			479	L	LEU:479:A	-0.473	9	-0.711, -0.430	9.8	e	f	41/47	L		479	L	LEU:479:A	0.884	4	0.266, 1.243	5.3	e		151/152	L,N,D,M,F,E,V,G		479	L	LEU:479:A	1.259	3	0.536, 1.727	4.3	e		102/103	L,N,D,M,F,E,V,G
480	E	GLU:480:A	-0.488	8	-0.586, -0.442	8.8	e	f	149/150	E,V,T,Y,Q,X,K			480	E	GLU:480:A	0.269	5*	-0.430, 0.634	8.4	e		42/47	E,K		480	E	GLU:480:A	1.126	3	0.636, 1.243	4.3	e		151/152	E,Q,K,R,D,A,N,H,C,S,T,V,G		480	E	GLU:480:A	2.149	2	1.155, 3.323	3.1	e		102/103	K,R,D,A,N,H,Q,C,S,T,V,G,E
481	R	ARG:481:A	-0.263	7	-0.442, -0.201	8.6	e		149/150	R,K,X,N,Q,S,A,H			481	R	ARG:481:A	0.254	5*	-0.430, 0.634	8.4	e		43/47	R,N		481	R	ARG:481:A	3.000	1	1.789, 3.269	3.1	e		150/152	R,S,K,A,G,E,N,D,Q,C,H		481	R	ARG:481:A	3.212	1	1.727, 3.323	3.1	e		101/103	E,S,N,K,G,D,Q,A,R,C,H
482	R	ARG:482:A	-0.306	7	-0.442, -0.201	8.6	e		149/150	R,H,K,A,X,M,Q,Y,G,S			482	R	ARG:482:A	-0.530	9	-0.713, -0.527	9.9	e	f	45/47	R		482	R	ARG:482:A	1.249	3	0.636, 1.789	4.3	e		148/152	K,R,T,M,A,C,E,Q,G,S,D		482	R	ARG:482:A	1.639	3	0.797, 1.727	4.3	e		99/103	A,K,C,E,Q,G,S,T,D,R
483	F	PHE:483:A	-0.601	9	-0.674, -0.545	9.8	e	f	149/150	F,L,X,I			483	F	PHE:483:A	-0.520	9	-0.713, -0.482	9.9	e	f	45/47	F		483	F	PHE:483:A	2.996	1	1.789, 3.269	3.1	e		144/152	F,Y,V,G,D,P,S,N,I,K,L,Q,A		483	F	PHE:483:A	3.209	1	1.727, 3.323	3.1	e		95/103	G,D,P,S,N,I,K,L,Q,A,F
484	G	GLY:484:A	-0.420	7	-0.586, -0.296	8.7	e		147/150	G,C,T,X,V,S			484	G	GLY:484:A	-0.427	8	-0.711, -0.367	9.8	e	f	43/47	G		484	G	GLY:484:A	1.607	3	0.893, 1.789	4.3	e		139/152	G,R,V,K,D,S,E,C,I,X,L,P		484	G	GLY:484:A	1.771	3	0.797, 1.727	4.3	e		90/103	V,K,D,G,S,E,C,I,X,L,P
485	R	ARG:485:A	0.565	4	0.241, 0.834	5.4	e		147/150	R,T,N,C,K,S,A,Q,E,D,X			485	R	ARG:485:A	0.192	5*	-0.430, 0.634	8.4	e		43/47	N,R		485	R	ARG:485:A	1.418	3	0.636, 1.789	4.3	e		113/152	K,N,T,R,G,A,E,S,I,Q,P,H		485	R	ARG:485:A	2.951	1	1.727, 3.323	3.1	e		64/103	G,A,E,S,I,Q,N,P,K,H,T,R
486	V	VAL:486:A	0.601	4	0.241, 0.834	5.4	e		145/150	V,G,D,A,E,T,S,Q,K,H,X,M,R,N,I,L,Y			486	V	VAL:486:A	-0.560	9	-0.713, -0.527	9.9	e	f	43/47	V		486	V	VAL:486:A	-0.073	5	-0.501, 0.266	7.5	e		94/152	H,V,L,R		486	V	VAL:486:A	-0.612	8	-0.875, -0.525	9.8	e	f	45/103	V
487	G	GLY:487:A	0.402	4	0.059, 0.485	5.4	e		146/150	G,D,F,T,K,A,S,X,N,Q,R,P,E			487	G	GLY:487:A	-0.427	8	-0.711, -0.367	9.8	e	f	43/47	G		487	G	GLY:487:A	0.478	4	-0.201, 0.893	6.4	e		94/152	G,C,S,V		487	G	GLY:487:A	-0.485	8	-0.865, -0.342	9.7	e	f	45/103	G
488	G	GLY:488:A	-0.179	6	-0.375, -0.085	7.5	e		148/150	G,S,N,X,E,K,D			488	G	GLY:488:A	-0.427	8	-0.711, -0.367	9.8	e	f	43/47	G		488	G	GLY:488:A	-0.383	7	-0.800, -0.106	8.5	e		94/152	G,E		488	G	GLY:488:A	-0.485	8	-0.865, -0.342	9.7	e	f	45/103	G
489	R	ARG:489:A	1.385	3	0.834, 1.405	4.3	e		148/150	R,K,G,P,N,D,Q,A,T,S,X			489	R	ARG:489:A	0.196	5*	-0.430, 0.634	8.4	e		43/47	K,R		489	R	ARG:489:A	2.781	1	1.243, 3.269	3.1	e		120/152	T,A,K,R,V,M,E,P,S,G,D,N,Q,I,L		489	R	ARG:489:A	3.213	1	1.727, 3.323	3.1	e		71/103	E,P,K,S,G,D,N,Q,I,A,L,R
490	I	ILE:490:A	-0.674	9	-0.727, -0.650	9.9	e	f	149/150	I,V,X,L			490	I	ILE:490:A	-0.566	9	-0.713, -0.564	9.9	e	f	43/47	I		490	I	ILE:490:A	1.773	3	0.893, 1.789	4.3	e		136/152	I,V,L,F,C,Y		490	I	ILE:490:A	1.938	2	0.797, 3.323	4.1	e		87/103	C,F,Y,L,I,V
491	P	PRO:491:A	-0.151	6	-0.375, -0.085	7.5	e		149/150	P,Q,K,S,X,D,A			491	P	PRO:491:A	-0.398	8	-0.711, -0.367	9.8	e	f	43/47	P		491	P	PRO:491:A	-0.613	8	-0.874, -0.436	9.7	e	f	136/152	P,S,V		491	P	PRO:491:A	-0.598	8	-0.800, -0.470	9.7	e	f	87/103	V,P
492	V	VAL:492:A	0.018	5	-0.201, 0.059	6.5	e		150/150	V,I			492	V	VAL:492:A	-0.560	9	-0.713, -0.527	9.9	e	f	43/47	V		492	V	VAL:492:A	0.480	4	0.124, 0.636	5.4	e		149/152	I,V,L,F,K		492	V	VAL:492:A	0.148	5	-0.178, 0.335	6.5	e		100/103	L,V,I,F,K
493	T	THR:493:A	0.281	5	0.059, 0.485	5.4	e		150/150	T,E,V,L,I,M,H,Q,N,K			493	T	THR:493:A	-0.551	9	-0.713, -0.527	9.9	e	f	43/47	T		493	T	THR:493:A	1.199	3	0.636, 1.789	4.3	e		148/152	V,T,F,D,K,L,S,A,C,I,E,N,X		493	T	THR:493:A	1.455	3	0.797, 1.727	4.3	e		99/103	K,L,S,T,A,C,I,E,N,V,X,F
494	P	PRO:494:A	-0.382	7	-0.545, -0.296	8.7	e		150/150	P,A			494	P	PRO:494:A	-0.398	8	-0.711, -0.367	9.8	e	f	43/47	P		494	P	PRO:494:A	-0.045	5	-0.436, 0.124	7.5	e		149/152	P,S,H,A		494	P	PRO:494:A	-0.141	6	-0.470, 0.037	7.5	e		100/103	P,A,S
495	S	SER:495:A	-0.601	9	-0.674, -0.545	9.8	e	f	150/150	S,T,N			495	S	SER:495:A	-0.568	9	-0.713, -0.564	9.9	e	f	43/47	S		495	S	SER:495:A	-0.348	7	-0.561, -0.201	7.6	e		149/152	T,S,D,N		495	S	SER:495:A	-0.167	6	-0.410, 0.037	7.5	e		100/103	T,S,N,D
496	E	GLU:496:A	0.361	4	0.059, 0.485	5.4	e		150/150	E,T,D,Q,A,S,V,P,G,K,L			496	E	GLU:496:A	0.264	5*	-0.430, 0.634	8.4	e		43/47	E,A		496	E	GLU:496:A	0.220	5	-0.106, 0.433	5.4	e		149/152	A,E,V,D,K		496	E	GLU:496:A	0.287	5	-0.079, 0.536	5.4	e		100/103	E,D,K,V,A
497	S	SER:497:A	0.967	4	0.485, 1.405	4.3	e		150/150	S,A,E,D,P,N,K,Q,G,R,M			497	S	SER:497:A	1.301	4	0.186, 2.251	5.3	e		43/47	A,S		497	S	SER:497:A	1.823	2	0.893, 1.789	4.3	e		149/152	E,A,S,R,D,G,Q,H,P,K,N,M		497	S	SER:497:A	1.863	2	1.155, 1.727	3.3	e		100/103	A,E,Q,H,P,K,D,R,S,N,M
498	F	PHE:498:A	-0.684	9	-0.739, -0.650	9.9	e	f	150/150	F,Y,L			498	F	PHE:498:A	-0.497	9	-0.713, -0.482	9.9	e	f	43/47	F		498	F	PHE:498:A	-0.580	8	-0.800, -0.436	8.7	e	f	149/152	F,S,I,L		498	F	PHE:498:A	-0.527	8	-0.724, -0.410	9.7	e	f	100/103	L,F,S
499	Q	GLN:499:A	0.095	5	-0.201, 0.241	6.5	e		150/150	Q,K,N,S,E,A,D,L,R,F,Y			499	Q	GLN:499:A	-0.553	9	-0.713, -0.527	9.9	e	f	43/47	Q		499	Q	GLN:499:A	0.661	4	0.266, 0.893	5.4	e		149/152	Q,K,R,E,N,T,M,I		499	Q	GLN:499:A	0.968	4	0.335, 1.155	5.3	e		100/103	K,E,R,N,T,Q,M,I
500	K	LYS:500:A	0.408	4	0.059, 0.485	5.4	e		150/150	K,Q,D,E,A,R,T,S,N			500	K	LYS:500:A	-0.522	9	-0.713, -0.482	9.9	e	f	43/47	K		500	K	LYS:500:A	1.373	3	0.636, 1.789	4.3	e		149/152	D,K,N,H,L,R,Q,A,E,T,S,I		500	K	LYS:500:A	1.514	3	0.797, 1.727	4.3	e		100/103	H,L,R,K,Q,A,E,T,N,S,I
501	R	ARG:501:A	-0.237	6	-0.442, -0.201	8.6	e		150/150	R,K			501	R	ARG:501:A	-0.509	9	-0.713, -0.482	9.9	e	f	43/47	R		501	R	ARG:501:A	0.097	5	-0.287, 0.266	6.5	e		149/152	R,S,Y,I,M,L,F		501	R	ARG:501:A	0.161	5	-0.178, 0.335	6.5	e		100/103	Y,I,M,L,F,R
502	I	ILE:502:A	-0.457	8	-0.545, -0.375	8.7	b		150/150	I,V,M,R			502	I	ILE:502:A	-0.566	9	-0.713, -0.564	9.9	b	s	43/47	I		502	I	ILE:502:A	-0.304	6	-0.561, -0.106	7.5	b		149/152	I,F,V,L,R,Q		502	I	ILE:502:A	-0.116	6	-0.410, 0.037	7.5	b		100/103	L,F,R,Q,I
503	S	SER:503:A	0.360	4	0.059, 0.485	5.4	e		150/150	S,A,H,G,Q,T,M,K,L			503	S	SER:503:A	-0.568	9	-0.713, -0.564	9.9	e	f	43/47	S		503	S	SER:503:A	-0.102	5	-0.365, 0.124	7.5	e		149/152	S,L,D,E,Q,N		503	S	SER:503:A	0.017	5	-0.266, 0.172	6.5	e		100/103	D,E,Q,N,S
504	G	GLY:504:A	-0.631	9	-0.713, -0.586	9.8	e	f	150/150	G,S,A			504	G	GLY:504:A	-0.427	8	-0.711, -0.367	9.8	e	f	43/47	G		504	G	GLY:504:A	0.113	5	-0.287, 0.433	6.4	e		145/152	G,D,S,H,C,N		504	G	GLY:504:A	0.161	5	-0.266, 0.335	6.5	e		97/103	S,H,C,N,G
505	A	ALA:505:A	-0.767	9	-0.776, -0.767	9.9	e	f	150/150	A			505	A	ALA:505:A	-0.538	9	-0.713, -0.527	9.9	e	f	44/47	A		505	A	ALA:505:A	-0.415	7	-0.667, -0.287	8.6	e		148/152	A,T,S,H,N		505	A	ALA:505:A	-0.218	6	-0.470, -0.079	7.5	e		100/103	A,T,S,H,N
506	S	SER:506:A	-0.746	9	-0.770, -0.739	9.9	e	f	150/150	S,N			506	S	SER:506:A	-0.570	9	-0.713, -0.564	9.9	e	f	44/47	S		506	S	SER:506:A	-0.085	5	-0.365, 0.124	7.5	e		148/152	S,K,R,T,H		506	S	SER:506:A	0.244	5	-0.079, 0.536	5.4	e		100/103	S,K,R,T,H
507	E	GLU:507:A	-0.764	9	-0.776, -0.762	9.9	b	s	150/150	E			507	E	GLU:507:A	-0.504	9	-0.713, -0.482	9.9	b	s	44/47	E		507	E	GLU:507:A	-0.861	9	-0.993, -0.800	9.8	b	s	148/152	E,K		507	E	GLU:507:A	-0.851	9	-0.894, -0.837	9.9	b	s	100/103	E
508	K	LYS:508:A	-0.698	9	-0.749, -0.674	9.9	e	f	150/150	K,V			508	K	LYS:508:A	0.772	4	-0.099, 1.453	6.4	e		47/47	K,S,E		508	K	LYS:508:A	-0.454	7	-0.667, -0.287	8.6	e		150/152	K,E,A,S,T		508	K	LYS:508:A	-0.323	7	-0.574, -0.178	8.6	e		102/103	A,E,S,T,K
509	D	ASP:509:A	-0.764	9	-0.776, -0.762	9.9	e	f	150/150	D			509	D	ASP:509:A	-0.529	9	-0.713, -0.527	9.9	e	f	47/47	D		509	D	ASP:509:A	-0.381	7	-0.616, -0.201	8.6	e		151/152	D,A,N,E,Q		509	D	ASP:509:A	-0.265	6	-0.525, -0.079	8.5	e		103/103	D,N,E,A,Q
510	I	ILE:510:A	-0.746	9	-0.767, -0.739	9.9	e	f	150/150	I,L			510	I	ILE:510:A	-0.035	5*	-0.527, 0.186	9.5	e		47/47	I,H		510	I	ILE:510:A	-0.582	8	-0.759, -0.436	8.7	e	f	151/152	I,H,L,V		510	I	ILE:510:A	-0.655	8	-0.800, -0.574	9.8	e	f	103/103	V,I,H
511	V	VAL:511:A	-0.744	9	-0.767, -0.727	9.9	b	s	150/150	V,C			511	V	VAL:511:A	0.135	5	-0.430, 0.382	8.5	b		47/47	V,S		511	V	VAL:511:A	-0.506	7	-0.715, -0.365	8.7	b		151/152	V,S,I,M		511	V	VAL:511:A	-0.523	8	-0.692, -0.410	9.7	b		103/103	V,I,S
512	H	HIS:512:A	-0.677	9	-0.727, -0.650	9.9	b	s	150/150	H,L,Y,Q			512	H	HIS:512:A	0.011	5*	-0.482, 0.382	9.5	b		47/47	H,R		512	H	HIS:512:A	-0.038	5	-0.365, 0.124	7.5	b		151/152	H,R,Y,A,S,T,D		512	H	HIS:512:A	-0.247	6	-0.525, -0.079	8.5	b		103/103	A,S,T,D,H,R
513	S	SER:513:A	-0.769	9	-0.776, -0.767	9.9	e	f	150/150	S			513	S	SER:513:A	0.403	5	-0.205, 0.634	7.4	e		47/47	S,H,P		513	S	SER:513:A	-0.066	5	-0.365, 0.124	7.5	e		151/152	S,H,P,A,Y,F		513	S	SER:513:A	0.280	5	-0.079, 0.536	5.4	e		103/103	S,A,Y,F,H,P
514	G	GLY:514:A	-0.757	9	-0.775, -0.756	9.9	e	f	150/150	G			514	G	GLY:514:A	-0.455	8	-0.711, -0.430	9.8	e	f	47/47	G		514	G	GLY:514:A	-0.102	5	-0.436, 0.124	7.5	e		151/152	G,C,A,S,V		514	G	GLY:514:A	-0.529	8	-0.724, -0.410	9.7	e	f	103/103	G,A
515	L	LEU:515:A	-0.763	9	-0.776, -0.762	9.9	b	s	150/150	L			515	L	LEU:515:A	-0.518	9	-0.713, -0.482	9.9	b	s	47/47	L		515	L	LEU:515:A	-0.859	9	-1.017, -0.759	9.8	b	s	151/152	L,F		515	L	LEU:515:A	-0.824	9	-0.894, -0.800	9.9	b	s	103/103	L
516	D	ASP:516:A	-0.168	6	-0.375, -0.085	7.5	e		150/150	D,A,E,N,S,H			516	D	ASP:516:A	0.215	5*	-0.430, 0.634	8.4	e		47/47	D,A		516	D	ASP:516:A	-0.497	7	-0.715, -0.365	8.7	e		151/152	A,D,V,K,Q		516	D	ASP:516:A	-0.570	8	-0.724, -0.470	9.7	e	f	103/103	K,Q,D,A
517	Y	TYR:517:A	-0.262	7	-0.442, -0.201	8.6	e		150/150	Y,F,T,Q,H			517	Y	TYR:517:A	0.314	5*	-0.430, 0.634	8.4	e		47/47	Y,R		517	Y	TYR:517:A	-0.216	6	-0.501, 0.002	7.5	e		151/152	Y,R,D,P,C,F,T		517	Y	TYR:517:A	-0.383	7	-0.617, -0.266	8.6	e		103/103	F,T,Y,R
518	T	THR:518:A	-0.500	8	-0.586, -0.442	8.8	b		150/150	T,S,P,A			518	T	THR:518:A	-0.068	6*	-0.527, 0.186	9.5	b		47/47	T,S		518	T	THR:518:A	-0.652	8	-0.838, -0.561	9.7	b		151/152	T,S,A,V,I		518	T	THR:518:A	-0.539	8	-0.724, -0.410	9.7	b		103/103	V,I,T,S
519	M	MET:519:A	-0.769	9	-0.776, -0.767	9.9	b	s	150/150	M			519	M	MET:519:A	-0.099	6*	-0.527, 0.186	9.5	b		47/47	M,E		519	M	MET:519:A	-0.614	8	-0.800, -0.501	8.7	b		151/152	M,E,T,L		519	M	MET:519:A	-0.481	8	-0.656, -0.342	8.7	b		103/103	L,M,E
520	E	GLU:520:A	-0.647	9	-0.713, -0.620	9.9	e	f	150/150	E,D,G,A			520	E	GLU:520:A	0.160	5*	-0.482, 0.382	9.5	e		47/47	E,A		520	E	GLU:520:A	-0.947	9	-1.038, -0.907	9.9	e	f	151/152	E,A		520	E	GLU:520:A	-0.763	9	-0.852, -0.724	9.9	e	f	103/103	E,A
521	R	ARG:521:A	-0.469	8	-0.586, -0.375	8.7	e	f	150/150	R,H,K			521	R	ARG:521:A	-0.532	9	-0.713, -0.527	9.9	e	f	47/47	R		521	R	ARG:521:A	0.617	4	0.124, 0.893	5.4	e		151/152	R,H,P,Y,S,C,T,A,F,M		521	R	ARG:521:A	0.330	5	-0.079, 0.536	5.4	e		103/103	T,S,A,F,M,R
522	S	SER:522:A	-0.652	9	-0.713, -0.620	9.9	b	s	150/150	S,T,A			522	S	SER:522:A	-0.587	9	-0.713, -0.564	9.9	b	s	47/47	S		522	S	SER:522:A	-0.448	7	-0.667, -0.287	8.6	b		151/152	S,P,A,T		522	S	SER:522:A	-0.303	7	-0.525, -0.178	8.6	b		103/103	A,S,T
523	A	ALA:523:A	-0.616	9	-0.695, -0.586	9.8	b	s	150/150	A,S,G			523	A	ALA:523:A	0.058	5*	-0.482, 0.382	9.5	b		47/47	A,R		523	A	ALA:523:A	0.270	5	-0.106, 0.433	5.4	b		151/152	A,R,T,G,V		523	A	ALA:523:A	0.218	5	-0.178, 0.536	6.4	b		103/103	G,A,V,R
524	R	ARG:524:A	-0.148	6	-0.375, -0.085	7.5	e		149/150	R,K,Q,T,V,N			524	R	ARG:524:A	0.143	5*	-0.482, 0.382	9.5	e		47/47	R,S		524	R	ARG:524:A	2.261	2	1.243, 3.269	3.1	e		151/152	R,S,K,Q,H,E,L,I,A,T		524	R	ARG:524:A	2.761	1	1.155, 3.323	3.1	e		103/103	H,Q,K,E,L,R,I,A,T,S
525	A	ALA:525:A	-0.361	7	-0.498, -0.296	8.7	e		149/150	A,Q,N,R,S			525	A	ALA:525:A	0.075	5*	-0.482, 0.382	9.5	e		45/47	A,K		525	A	ALA:525:A	-0.473	7	-0.715, -0.287	8.6	e		150/152	Q,V,A,K,G		525	A	ALA:525:A	-0.448	7	-0.692, -0.266	9.6	e		101/103	G,A,K
526	I	ILE:526:A	-0.674	9	-0.727, -0.650	9.9	b	s	149/150	I,L,M			526	I	ILE:526:A	0.522	4	-0.205, 0.971	7.4	b		45/47	I,R,V		526	I	ILE:526:A	-0.683	8	-0.838, -0.561	9.7	b		150/152	I,R,V		526	I	ILE:526:A	-0.573	8	-0.724, -0.470	9.7	b		101/103	I,V,R
527	M	MET:527:A	-0.615	9	-0.674, -0.586	9.8	b	s	149/150	M,I,K			527	M	MET:527:A	-0.046	5*	-0.527, 0.186	9.5	b		45/47	M,P		527	M	MET:527:A	-0.682	8	-0.838, -0.561	9.7	b		150/152	M,P,I,K		527	M	MET:527:A	-0.657	8	-0.800, -0.574	9.8	b		101/103	M,K,P
528	K	LYS:528:A	0.755	4	0.241, 0.834	5.4	e		149/150	K,I,R,S,Q,D,N,L,A,H,E,T			528	K	LYS:528:A	1.441	4	0.382, 2.251	5.3	e		45/47	K,V,T		528	K	LYS:528:A	2.924	1	1.789, 3.269	3.1	e		150/152	R,H,K,V,T,C,D,G,N,Y,Q,E,S,A,I		528	K	LYS:528:A	1.318	3	0.797, 1.727	4.3	e		101/103	T,K,N,Y,Q,E,H,S,A,I,V
529	T	THR:529:A	-0.459	8	-0.586, -0.375	8.7	b		149/150	T,V,I,K,A,S			529	T	THR:529:A	0.014	5*	-0.482, 0.382	9.5	b		45/47	T,P		529	T	THR:529:A	0.409	4	0.002, 0.636	5.4	b		150/152	T,P,M,V,I,A		529	T	THR:529:A	0.432	4	0.037, 0.797	5.4	b		101/103	V,I,M,T,A,P
530	A	ALA:530:A	-0.394	7	-0.545, -0.296	8.7	b		149/150	A,S,V,G,T			530	A	ALA:530:A	-0.006	5*	-0.527, 0.186	9.5	b		47/47	A,S		530	A	ALA:530:A	-0.543	7	-0.759, -0.436	8.7	b		152/152	A,H,S,V,C		530	A	ALA:530:A	-0.549	8	-0.724, -0.470	9.7	b		103/103	A,S,C
531	M	MET:531:A	0.334	5	0.059, 0.485	5.4	e		148/150	M,A,T,K,S,Q,I,E,N,D,V,H,L,R			531	M	MET:531:A	-0.583	9	-0.713, -0.564	9.9	e	f	46/47	M		531	M	MET:531:A	0.643	4	0.266, 0.893	5.4	e		151/152	M,I,V,R,K,N,A,T,S,H,L,E		531	M	MET:531:A	0.517	4	0.172, 0.797	5.4	e		102/103	N,A,T,S,H,L,E,I,M
532	K	LYS:532:A	0.477	4	0.059, 0.485	5.4	e		148/150	K,R,I,Q,E,N,T,A,D,S			532	K	LYS:532:A	1.540	3	0.382, 2.251	5.3	e		46/47	K,R		532	K	LYS:532:A	-0.070	5	-0.365, 0.124	7.5	e		151/152	K,C,R,Q,E		532	K	LYS:532:A	-0.047	5	-0.342, 0.172	7.5	e		102/103	Q,E,K,R
533	Y	TYR:533:A	0.073	5	-0.201, 0.241	6.5	b		148/150	Y,F,L,M,H			533	Y	TYR:533:A	-0.487	9	-0.711, -0.482	9.9	b	s	46/47	Y		533	Y	TYR:533:A	0.516	4	0.002, 0.893	5.4	b		151/152	Y,W,H,C,N,F		533	Y	TYR:533:A	0.369	5	-0.079, 0.536	5.4	b		102/103	Y,H,N,F
534	N	ASN:534:A	-0.396	7	-0.498, -0.296	8.7	e		148/150	N,G,D,Q,R,K			534	N	ASN:534:A	-0.554	9	-0.713, -0.527	9.9	e	f	46/47	N		534	N	ASN:534:A	0.042	5	-0.287, 0.266	6.5	e		151/152	N,K,Q,H,A,V,E,G,S		534	N	ASN:534:A	0.381	4	0.037, 0.536	5.4	e		102/103	Q,K,H,A,V,E,N,G,S
535	L	LEU:535:A	-0.680	9	-0.739, -0.650	9.9	e	f	148/150	L,T,M			535	L	LEU:535:A	0.264	5*	-0.430, 0.634	8.4	e		46/47	L,R		535	L	LEU:535:A	-0.446	7	-0.715, -0.287	8.6	e		151/152	L,R,I,T		535	L	LEU:535:A	-0.227	6	-0.525, -0.079	8.5	e		102/103	L,I,T,R
536	G	GLY:536:A	-0.757	9	-0.775, -0.756	9.9	e	f	148/150	G			536	G	GLY:536:A	1.596	3	0.186, 2.251	5.3	e		46/47	G,S		536	G	GLY:536:A	0.607	4	0.124, 0.893	5.4	e		151/152	G,S,R,C,T,Q		536	G	GLY:536:A	0.508	4	0.037, 0.797	5.4	e		102/103	C,T,Q,R,G,S
537	L	LEU:537:A	-0.476	8	-0.586, -0.442	8.8	b		148/150	L,I,M			537	L	LEU:537:A	-0.501	9	-0.713, -0.482	9.9	b	s	46/47	L		537	L	LEU:537:A	-0.529	7	-0.759, -0.365	8.7	b		151/152	L,M,S,N,K		537	L	LEU:537:A	-0.649	8	-0.778, -0.574	9.8	b		102/103	L,N,K
538	D	ASP:538:A	-0.689	9	-0.739, -0.650	9.9	e	f	148/150	D,N			538	D	ASP:538:A	-0.513	9	-0.713, -0.482	9.9	e	f	46/47	D		538	D	ASP:538:A	-0.913	9	-1.038, -0.838	9.9	e	f	151/152	D,E		538	D	ASP:538:A	-0.841	9	-0.894, -0.820	9.9	e	f	102/103	D
539	L	LEU:539:A	-0.235	6	-0.442, -0.085	8.5	b		148/150	L,I,M			539	L	LEU:539:A	-0.501	9	-0.713, -0.482	9.9	b	s	46/47	L		539	L	LEU:539:A	0.095	5	-0.287, 0.266	6.5	b		151/152	L,S,P,I,V		539	L	LEU:539:A	-0.095	5	-0.410, 0.172	7.5	b		102/103	V,L,I
540	R	ARG:540:A	-0.765	9	-0.776, -0.762	9.9	b	s	148/150	R			540	R	ARG:540:A	-0.532	9	-0.713, -0.527	9.9	b	s	47/47	R		540	R	ARG:540:A	-0.911	9	-1.038, -0.838	9.9	b	s	152/152	R,M		540	R	ARG:540:A	-0.841	9	-0.894, -0.820	9.9	b	s	103/103	R
541	T	THR:541:A	-0.551	8	-0.650, -0.498	9.8	b		148/150	T,S,L,A,M			541	T	THR:541:A	-0.100	6*	-0.527, 0.186	9.5	b		47/47	S,T		541	T	THR:541:A	0.099	5	-0.201, 0.266	6.5	b		152/152	T,F,S,M,I,K,R,Q		541	T	THR:541:A	-0.246	6	-0.470, -0.079	7.5	b		103/103	T,K,R,Q,S
542	A	ALA:542:A	-0.706	9	-0.749, -0.674	9.9	b	s	148/150	A,S			542	A	ALA:542:A	-0.558	9	-0.713, -0.527	9.9	b	s	47/47	A		542	A	ALA:542:A	-0.839	9	-0.967, -0.759	9.8	b	s	152/152	A,G,D		542	A	ALA:542:A	-0.848	9	-0.894, -0.837	9.9	b	s	103/103	A
543	A	ALA:543:A	-0.645	9	-0.713, -0.620	9.9	b	s	148/150	A,G,S			543	A	ALA:543:A	-0.006	5*	-0.527, 0.186	9.5	b		47/47	A,S		543	A	ALA:543:A	-0.657	8	-0.838, -0.561	9.7	b		152/152	A,G,S,T		543	A	ALA:543:A	-0.552	8	-0.724, -0.470	9.7	b		103/103	A,T,S
544	Y	TYR:544:A	-0.487	8	-0.620, -0.442	9.8	b		147/150	Y,F			544	Y	TYR:544:A	0.372	5*	-0.367, 0.634	8.4	b		47/47	Y,P		544	Y	TYR:544:A	-0.603	8	-0.838, -0.436	9.7	b		152/152	Y,P,F,N		544	Y	TYR:544:A	-0.406	7	-0.656, -0.266	8.6	b		103/103	Y,F,N,P
545	V	VAL:545:A	-0.192	6	-0.375, -0.085	7.5	b		147/150	V,I,A,L,M			545	V	VAL:545:A	0.892	4	0.029, 1.453	5.4	b		47/47	V,I		545	V	VAL:545:A	-0.005	5	-0.287, 0.124	6.5	b		152/152	V,L,I,A		545	V	VAL:545:A	-0.167	6	-0.410, 0.037	7.5	b		103/103	I,V
546	N	ASN:546:A	-0.386	7	-0.498, -0.296	8.7	b		147/150	N,H,T,S,V,G,A,M,C			546	N	ASN:546:A	-0.025	5*	-0.527, 0.186	9.5	b		47/47	N,T		546	N	ASN:546:A	0.621	4	0.124, 0.893	5.4	b		152/152	N,A,T,W,Y,H,F		546	N	ASN:546:A	1.036	4	0.335, 1.155	5.3	b		103/103	W,Y,H,F,N,T
547	S	SER:547:A	-0.369	7	-0.498, -0.296	8.7	b		147/150	S,A,C			547	S	SER:547:A	-0.587	9	-0.713, -0.564	9.9	b	s	47/47	S		547	S	SER:547:A	-0.629	8	-0.800, -0.501	8.7	b		152/152	A,S,T		547	S	SER:547:A	-0.614	8	-0.752, -0.525	9.8	b		103/103	S,T,A
548	I	ILE:548:A	-0.492	8	-0.586, -0.442	8.8	b		147/150	I,V,L			548	I	ILE:548:A	-0.017	5*	-0.527, 0.186	9.5	b		47/47	I,C		548	I	ILE:548:A	0.007	5	-0.287, 0.266	6.5	b		152/152	I,L,C,V,T,S,A		548	I	ILE:548:A	0.106	5	-0.178, 0.335	6.5	b		103/103	V,I,T,S,A,C
549	E	GLU:549:A	-0.350	7	-0.498, -0.296	8.7	e		147/150	E,V,Q,K,T,S,N			549	E	GLU:549:A	0.980	4	0.029, 1.453	5.4	e		47/47	E,T,G		549	E	GLU:549:A	0.947	4	0.433, 1.243	4.3	e		152/152	E,A,T,G,D,S,L,F,Y,N,Q,K,R		549	E	GLU:549:A	1.458	3	0.797, 1.727	4.3	e		103/103	E,D,S,L,F,Y,N,Q,K,R,T,G
550	K	LYS:550:A	-0.766	9	-0.776, -0.762	9.9	e	f	147/150	K			550	K	LYS:550:A	0.114	5*	-0.482, 0.382	9.5	e		47/47	K,P		550	K	LYS:550:A	-0.841	9	-0.967, -0.759	9.8	e	f	152/152	K,A,P		550	K	LYS:550:A	-0.750	9	-0.852, -0.692	9.9	e	f	103/103	K,P
551	I	ILE:551:A	-0.624	9	-0.695, -0.586	9.8	b	s	147/150	I,V			551	I	ILE:551:A	0.096	5*	-0.482, 0.382	9.5	b		47/47	I,D		551	I	ILE:551:A	-0.193	6	-0.436, 0.002	7.5	b		152/152	V,S,I,D,A,F		551	I	ILE:551:A	-0.564	8	-0.724, -0.470	9.7	b		103/103	I,V,F,D
552	F	PHE:552:A	-0.219	6	-0.375, -0.085	7.5	b		147/150	F,Y,I,V			552	F	PHE:552:A	0.196	5*	-0.430, 0.634	8.4	b		47/47	F,W		552	F	PHE:552:A	-0.575	7	-0.800, -0.436	8.7	b		152/152	F,S,W,C		552	F	PHE:552:A	-0.676	9	-0.820, -0.574	9.8	b	s	103/103	F,W
553	T	THR:553:A	1.321	3	0.834, 1.405	4.3	e		147/150	T,Q,A,S,I,N,E,L,K,G,H,V,R,D			553	T	THR:553:A	1.120	4	0.186, 1.453	5.4	e		47/47	Q,T,E		553	T	THR:553:A	0.977	4	0.433, 1.243	4.3	e		152/152	K,R,A,Q,T,E,L,N,H,S		553	T	THR:553:A	0.834	4	0.335, 1.155	5.3	e		103/103	K,L,R,N,Q,H,E,S,T
554	T	THR:554:A	-0.597	8	-0.674, -0.545	9.8	e	f	146/150	T,N,V,I,S			554	T	THR:554:A	-0.572	9	-0.713, -0.564	9.9	e	f	47/47	T		554	T	THR:554:A	-0.143	6	-0.436, 0.002	7.5	e		151/152	V,A,T,L,S,G		554	T	THR:554:A	-0.220	6	-0.470, -0.079	7.5	e		103/103	A,S,T,V,G
555	Y	TYR:555:A	-0.465	8	-0.586, -0.375	8.7	b		146/150	Y,H,Q,T,L,I			555	Y	TYR:555:A	0.314	5*	-0.430, 0.634	8.4	b		46/47	Y,R		555	Y	TYR:555:A	0.353	5	-0.106, 0.636	5.4	b		150/152	Y,P,R,L,M,V,I		555	Y	TYR:555:A	0.465	4	0.037, 0.797	5.4	b		102/103	Y,L,M,V,I,R
556	R	ARG:556:A	1.212	3	0.485, 1.405	4.3	e		146/150	R,K,A,S,N,H,T,V,Q,E,D			556	R	ARG:556:A	0.795	4	-0.099, 1.453	6.4	e		46/47	R,M,A		556	R	ARG:556:A	-0.119	6	-0.436, 0.002	7.5	e		150/152	N,A,R,M,S,E,D,K		556	R	ARG:556:A	-0.345	7	-0.574, -0.178	8.6	e		102/103	E,D,K,R,M,A
557	D	ASP:557:A	0.583	4	0.241, 0.834	5.4	e		146/150	D,E,L,G,M,T,A,Q,S,V			557	D	ASP:557:A	0.316	5*	-0.430, 0.634	8.4	e		46/47	D,R		557	D	ASP:557:A	-0.104	5	-0.436, 0.124	7.5	e		150/152	E,D,R,G,V,S,M,T		557	D	ASP:557:A	0.023	5	-0.266, 0.172	6.5	e		102/103	G,E,V,S,M,T,D,R
558	A	ALA:558:A	-0.644	9	-0.713, -0.620	9.9	e	f	146/150	A,Q,S			558	A	ALA:558:A	0.001	5*	-0.482, 0.186	9.5	e		46/47	A,G		558	A	ALA:558:A	-0.249	6	-0.501, -0.106	7.5	e		151/152	A,H,G,T,S,E		558	A	ALA:558:A	-0.222	6	-0.470, -0.079	7.5	e		102/103	A,T,S,E,G
559	G	GLY:559:A	-0.756	9	-0.775, -0.756	9.9	e	f	146/150	G			559	G	GLY:559:A	1.757	3	0.382, 2.251	5.3	e		46/47	G,E,P		559	G	GLY:559:A	0.009	5	-0.365, 0.266	7.5	e		151/152	G,P,E,S,V		559	G	GLY:559:A	-0.171	6	-0.525, 0.037	8.5	e		102/103	G,V,E,P
560	L	LEU:560:A	0.063	5	-0.201, 0.241	6.5	e		146/150	L,Q,F,V,M,I			560	L	LEU:560:A	0.280	5*	-0.430, 0.634	8.4	e		46/47	L,S		560	L	LEU:560:A	-0.298	6	-0.561, -0.106	7.5	e		151/152	V,L,S,M,I		560	L	LEU:560:A	-0.410	7	-0.617, -0.266	8.6	e		102/103	L,I,M,V,S
561	A	ALA:561:A	-0.291	7	-0.442, -0.201	8.6	e		145/150	A,T,Q,S,I,L			561	A	ALA:561:A	0.071	5*	-0.482, 0.382	9.5	e		45/47	A,R		561	A	ALA:561:A	-0.264	6	-0.501, -0.106	7.5	e		150/152	T,A,R,I,S,W,F		561	A	ALA:561:A	-0.319	7	-0.525, -0.178	8.6	e		101/103	S,W,F,T,A,R
562	F	PHE:562:A	-0.720	9	-0.762, -0.695	9.9	e	f	135/150	F,Y			562	F	PHE:562:A	1.031	4	0.029, 1.453	5.4	e		45/47	F,Y,L		562	F	PHE:562:A	0.092	5	-0.287, 0.266	6.5	e		149/152	F,P,Y,L,I,S,M,Q,W,K		562	F	PHE:562:A	-0.066	5	-0.342, 0.172	7.5	e		100/103	M,I,Q,W,K,F,Y,L
[truncated: 4 more columns]

## Sheet: Bb8_sum
Consurf homology search													Diptera Bb8-like												Diptera, mammalian												Diptera Bb8 and Gdh like
from -0.806 to -0.627 the grade is 9													from -0.819 to -0.637 the grade is 9												from -1.011 to -0.786 the grade is 9												from -0.846 to -0.658 the grade is 9
from -0.627 to -0.448 the grade is 8													from -0.637 to -0.455 the grade is 8												from -0.786 to -0.562 the grade is 8												from -0.658 to -0.470 the grade is 8
from -0.448 to -0.269 the grade is 7								Average COLOR - with sufficient data					from -0.455 to -0.273 the grade is 7								Average COLOR - with sufficient data				from -0.562 to -0.337 the grade is 7								Average COLOR - with sufficient data				from -0.470 to -0.282 the grade is 7								Average COLOR - with sufficient data
from -0.269 to -0.090 the grade is 6								6.51894					from -0.273 to -0.091 the grade is 6								6.45047				from -0.337 to -0.112 the grade is 6								6.12336				from -0.282 to -0.094 the grade is 6								6.41308
from -0.090 to 0.348 the grade is 5													from -0.091 to 0.368 the grade is 5												from -0.112 to 0.365 the grade is 5												from -0.094 to 0.376 the grade is 5
from 0.348 to 1.043 the grade is 4													from 0.368 to 1.104 the grade is 4												from 0.365 to 1.095 the grade is 4												from 0.376 to 1.127 the grade is 4
from 1.043 to 1.739 the grade is 3													from 1.104 to 1.839 the grade is 3												from 1.095 to 1.826 the grade is 3												from 1.127 to 1.878 the grade is 3
from 1.739 to 2.434 the grade is 2													from 1.839 to 2.575 the grade is 2												from 1.826 to 2.556 the grade is 2												from 1.878 to 2.629 the grade is 2
from 2.434 to 3.130 the grade is 1													from 2.575 to 3.311 the grade is 1												from 2.556 to 3.286 the grade is 1												from 2.629 to 3.380 the grade is 1
POS	SEQ	3LATOM	SCORE	COLOR	CONFIDENCE INTERVAL	CONFIDENCE INTERVAL COLORS	B/E	FUNCTION	MSA DATA	RESIDUE VARIETY			POS	SEQ	3LATOM	SCORE	COLOR	CONFIDENCE INTERVAL	CONFIDENCE INTERVAL COLORS	B/E	FUNCTION	MSA DATA	RESIDUE VARIETY		POS	SEQ	3LATOM	SCORE	COLOR	CONFIDENCE INTERVAL	CONFIDENCE INTERVAL COLORS	B/E	FUNCTION	MSA DATA	RESIDUE VARIETY		POS	SEQ	3LATOM	SCORE	COLOR	CONFIDENCE INTERVAL	CONFIDENCE INTERVAL COLORS	B/E	FUNCTION	MSA DATA	RESIDUE VARIETY
			(normalized)													(normalized)												(normalized)												(normalized)
1	M	MET:1:A	0.829	4*	-0.201, 1.523	6.3	e		3/150	M,L,K			1	M	MET:1:A	0.807	4	0.336, 1.150	5.3	e		38/55	A,V,L,G,M,K,R,I,P		1	M	MET:1:A	0.506	4	0.026, 0.659	5.4	e		109/152	M,I,V,T,A,L,G,K,R,P		1	M	MET:1:A	0.874	4	0.360, 1.189	5.3	e		80/103	A,V,L,G,M,K,R,I,P,H,Q
2	L	LEU:2:A	1.043	4*	0.026, 1.523	5.3	e		5/150	L,V,S			2	L	LEU:2:A	1.773	3	0.793, 1.720	4.3	e		49/55	R,M,Q,K,L,F,I		2	L	LEU:2:A	2.878	1	1.265, 3.287	3.1	e		122/152	Y,M,F,T,L,R,Q,K,I		2	L	LEU:2:A	1.346	3	0.564, 1.768	4.3	e		91/103	R,M,Q,K,L,F,I
3	R	ARG:3:A	0.880	4	0.026, 1.523	5.3	e		10/150	R,K,G			3	R	ARG:3:A	2.729	1	1.150, 3.313	3.1	e		49/55	T,N,H,Q,L,S,F,R,P,K,A		3	R	ARG:3:A	2.111	2	1.265, 3.287	3.1	e		122/152	R,K,H,Q,T,N,L,S,F,P,A		3	R	ARG:3:A	1.982	2	1.189, 1.768	3.3	e		91/103	T,N,H,Q,L,S,F,R,P,K,A
4	Y	TYR:4:A	1.262	3	0.365, 1.523	4.3	e		11/150	Y,Q,A,H,N,T			4	Y	TYR:4:A	2.636	1	1.150, 3.313	3.1	e		49/55	R,S,T,H,L,C,Y,N,G,M,K,V,P		4	Y	TYR:4:A	3.247	1	1.809, 3.287	3.1	e		80/152	Y,C,N,H,F,R,S,T,L,G,M,K,V,P		4	Y	TYR:4:A	2.592	2	1.189, 3.381	3.1	e		91/103	R,S,T,H,L,C,Y,N,G,M,K,V,P
5	T	THR:5:A	0.210	5*	-0.429, 0.613	7.4	e		5/150	T,V,A			5	T	THR:5:A	3.218	1	1.720, 3.313	3.1	e		49/55	L,F,G,I,P,S,V,M,A,Y,T,N,C		5	T	THR:5:A	3.195	1	1.809, 3.287	3.1	e		80/152	L,I,W,F,G,P,S,V,M,A,Y,T,N,C		5	T	THR:5:A	3.149	1	1.768, 3.381	3.1	e		91/103	L,F,G,I,P,S,V,M,A,Y,T,N,C
6	A	ALA:6:A	0.298	5*	-0.429, 0.613	7.4	e		5/150	A,Q,V			6	A	ALA:6:A	3.273	1	1.720, 3.313	3.1	e		49/55	P,R,E,V,A,S,G,T,Q,N,Y		6	A	ALA:6:A	3.275	1	1.809, 3.287	3.1	e		80/152	G,K,A,R,P,E,V,S,T,Q,N,Y		6	A	ALA:6:A	3.150	1	1.768, 3.381	3.1	e		91/103	P,R,E,V,A,S,G,T,Q,N,Y
7	R	ARG:7:A	1.763	2	0.613, 3.130	4.1	e		6/150	R,E,A,Q,Y			7	R	ARG:7:A	1.906	2	0.793, 1.720	4.3	e		49/55	V,G,Q,A,K,D,P,S,N,R,M,T		7	R	ARG:7:A	2.877	1	1.265, 3.287	3.1	e		80/152	E,A,S,P,K,V,G,Q,D,N,R,M,T		7	R	ARG:7:A	1.644	3	0.827, 1.768	4.3	e		91/103	V,G,Q,A,K,D,P,S,N,R,M,T
8	I	ILE:8:A	0.874	4	-0.098, 1.523	6.3	e		6/150	I,V,L,Q			8	I	ILE:8:A	3.301	1	1.720, 3.313	3.1	e		49/55	G,A,V,T,S,N,I,L,M,K,Y		8	I	ILE:8:A	3.276	1	1.809, 3.287	3.1	e		121/152	A,L,K,F,V,G,T,S,N,I,M,Y		8	I	ILE:8:A	3.370	1	1.768, 3.381	3.1	e		91/103	G,A,V,T,S,N,I,L,M,K,Y,Q,H
9	L	LEU:9:A	2.404	2	0.961, 3.130	4.1	e		10/150	L,A,T,Q			9	L	LEU:9:A	3.275	1	1.720, 3.313	3.1	e		46/55	L,F,I,A,G,R,V,H,S,C,P		9	L	LEU:9:A	3.192	1	1.809, 3.287	3.1	e		118/152	L,M,S,K,Q,F,I,A,G,R,V,H,C,P		9	L	LEU:9:A	3.296	1	1.768, 3.381	3.1	e		88/103	L,F,I,A,G,R,V,H,S,C,P
10	N	ASN:10:A	2.833	1	1.523, 3.130	3.1	e		15/150	N,H,K,A,Q,V,L,G			10	N	ASN:10:A	3.304	1	1.720, 3.313	3.1	e		44/55	K,S,L,Y,M,G,F,H,V,N,R,C		10	N	ASN:10:A	3.267	1	1.809, 3.287	3.1	e		116/152	L,R,Q,T,N,S,K,Y,M,G,F,H,V,C		10	N	ASN:10:A	3.350	1	1.768, 3.381	3.1	e		86/103	K,S,L,Y,M,G,F,H,V,N,R,C,A,T
11	G	GLY:11:A	3.069	1	1.523, 3.130	3.1	e		19/150	G,A,S,Q,R,T,K,E,P			11	G	GLY:11:A	2.521	2	1.150, 3.313	3.1	e		47/55	I,L,H,Y,N,S,G,K,R,Q,P		11	G	GLY:11:A	2.738	1	1.265, 3.287	3.1	e		121/152	L,I,V,M,P,T,H,Y,N,S,G,K,R,Q		11	G	GLY:11:A	3.361	1	1.768, 3.381	3.1	e		89/103	I,L,H,Y,N,S,G,K,R,Q,P,V,A,M
12	I	ILE:12:A	2.893	1	1.523, 3.130	3.1	e		21/150	I,A,S,V,M,L,C,Q			12	I	ILE:12:A	3.207	1	1.720, 3.313	3.1	e		39/55	L,F,C,M,G,I,V,K,Q,R,E		12	I	ILE:12:A	3.188	1	1.809, 3.287	3.1	e		113/152	S,A,P,I,V,Y,F,L,C,M,G,K,Q,R,E		12	I	ILE:12:A	3.293	1	1.768, 3.381	3.1	e		81/103	L,F,C,M,G,I,V,K,Q,R,E,H
13	Y	TYR:13:A	3.122	1	1.523, 3.130	3.1	e		26/150	Y,A,P,C,Q,L,N,V,T,K			13	Y	TYR:13:A	0.664	4	0.174, 1.150	5.3	e		39/55	R,Y,P,L,N,E,F,A		13	Y	TYR:13:A	0.686	4	0.148, 0.915	5.4	e		111/152	X,R,N,K,Y,S,P,L,E,F,A		13	Y	TYR:13:A	1.066	4	0.360, 1.189	5.3	e		81/103	R,Y,P,L,N,E,F,A,Q,H
14	P	PRO:14:A	3.127	1	1.523, 3.130	3.1	e		38/150	P,L,A,V,Q,K,T,M,I,N,R,H,S			14	P	PRO:14:A	3.190	1	1.720, 3.313	3.1	e		30/55	L,P,A,R,S,C,F,I,N		14	P	PRO:14:A	3.267	1	1.809, 3.287	3.1	e		102/152	G,I,A,V,P,T,S,N,Q,H,L,R,C,F		14	P	PRO:14:A	2.917	1	1.189, 3.381	3.1	e		72/103	L,P,A,R,S,C,F,I,N,E,D
15	L	LEU:15:A	3.128	1	1.523, 3.130	3.1	e		52/150	L,V,A,S,T,H,R,N,P,K,Y,M,C,Q			15	L	LEU:15:A	3.304	1	1.720, 3.313	3.1	e		28/55	R,C,A,L,F,Q,Y,I,V,T,N,G,P,H		15	L	LEU:15:A	3.264	1	1.809, 3.287	3.1	e		100/152	G,W,A,R,C,L,F,Q,Y,I,V,T,N,P,H		15	L	LEU:15:A	3.373	1	1.768, 3.381	3.1	e		70/103	R,C,A,L,F,Q,Y,I,V,T,N,G,P,H
16	M	MET:16:A	3.040	1	1.523, 3.130	3.1	e		64/150	M,H,V,I,S,C,L,T,N,Q,A			16	M	MET:16:A	3.251	1	1.720, 3.313	3.1	e		33/55	G,S,P,R,A,M,C,T,L,V,I		16	M	MET:16:A	3.206	1	1.809, 3.287	3.1	e		104/152	A,D,S,I,K,T,G,P,R,M,C,L,V		16	M	MET:16:A	3.283	1	1.768, 3.381	3.1	e		72/103	G,S,P,R,A,M,C,T,L,V,I
17	P	PRO:17:A	3.130	1	1.523, 3.130	3.1	e		72/150	P,A,L,I,Q,T,N,W,S,V,C,H,D,K,F,M,G,E			17	P	PRO:17:A	2.728	1	1.150, 3.313	3.1	e		25/55	P,C,Q,V,S,R,L		17	P	PRO:17:A	3.276	1	1.809, 3.287	3.1	e		99/152	R,G,A,V,T,P,C,Q,S,L		17	P	PRO:17:A	3.307	1	1.768, 3.381	3.1	e		67/103	P,C,Q,V,S,R,L,A,T
18	R	ARG:18:A	3.130	1	1.523, 3.130	3.1	e		80/150	R,I,Q,T,A,N,M,F,E,V,Y,L,C,S,K			18	R	ARG:18:A	3.265	1	1.720, 3.313	3.1	e		24/55	V,K,G,P,R,D,L,A,M,Q,C		18	R	ARG:18:A	3.281	1	1.809, 3.287	3.1	e		98/152	G,D,Q,L,A,M,V,W,K,P,R,C		18	R	ARG:18:A	3.369	1	1.768, 3.381	3.1	e		66/103	V,K,G,P,R,D,L,A,M,Q,C
19	Q	GLN:19:A	3.122	1	1.523, 3.130	3.1	e		83/150	Q,S,N,V,I,L,C,P,M,T,A,W,R,K,G,Y,D			19	Q	GLN:19:A	1.003	4	0.336, 1.150	5.3	e		25/55	S,P,E,Q,K,L,H,G		19	Q	GLN:19:A	2.211	2	1.265, 3.287	3.1	e		99/152	Q,R,A,H,S,P,G,Y,E,K,L		19	Q	GLN:19:A	1.422	3	0.564, 1.768	4.3	e		67/103	S,P,E,Q,K,L,H,G,A
20	V	VAL:20:A	3.130	1	1.523, 3.130	3.1	e		85/150	V,T,Q,S,N,C,R,Y,A,K,H,L,P,G,D,E,F,I			20	V	VAL:20:A	3.167	1	1.720, 3.313	3.1	e		24/55	M,L,G,I,V,R,H,P,F		20	V	VAL:20:A	3.266	1	1.809, 3.287	3.1	e		97/152	P,A,S,N,T,H,M,L,G,I,V,R,F		20	V	VAL:20:A	3.364	1	1.768, 3.381	3.1	e		65/103	M,L,G,I,V,R,H,P,F,S,N,T,A
21	L	LEU:21:A	2.077	2	0.961, 3.130	4.1	e		89/150	L,R,Q,S,A,P,G,V,Y,C,D,N,T,H,K			21	L	LEU:21:A	3.028	1	1.720, 3.313	3.1	e		33/55	A,T,I,S,M,L,Q,N,W,G		21	L	LEU:21:A	3.281	1	1.809, 3.287	3.1	e		56/152	A,T,G,M,Q,S,C,V,I,L,N,W		21	L	LEU:21:A	3.233	1	1.768, 3.381	3.1	e		45/103	A,T,I,S,M,L,Q,N,W,G,P
22	K	LYS:22:A	3.130	1	1.523, 3.130	3.1	e		90/150	K,S,G,R,Q,I,T,Y,N,E,A,L,D,V,H,F,M,C			22	K	LYS:22:A	3.281	1	1.720, 3.313	3.1	e		36/55	I,F,C,T,V,K,Q,H,R,L,M		22	K	LYS:22:A	3.285	1	1.809, 3.287	3.1	e		55/152	G,A,L,M,S,I,F,C,T,V,K,Q,H,R		22	K	LYS:22:A	3.369	1	1.768, 3.381	3.1	e		57/103	I,F,C,T,V,K,Q,H,R,L,M,S,A
23	R	ARG:23:A	3.129	1	1.523, 3.130	3.1	e		97/150	R,Y,S,G,N,W,C,L,T,F,Q,I,D,H,K,P,E			23	R	ARG:23:A	-0.797	9	-0.861, -0.775	9.9	e	f	49/55	R		23	R	ARG:23:A	0.294	5	-0.177, 0.659	6.4	e		65/152	Q,L,V,M,I,T,R		23	R	ARG:23:A	-0.826	9	-0.882, -0.807	9.9	e	f	92/103	R
24	S	SER:24:A	1.075	3	0.613, 1.523	4.3	e		98/150	S,A,N,Y,L,D,G,E,Q,H,T,K,V			24	S	SER:24:A	3.311	1	1.720, 3.313	3.1	e		50/55	L,R,S,G,Q,A,E,H,W,D,Y,N,F,M		24	S	SER:24:A	3.286	1	1.809, 3.287	3.1	e		53/152	D,R,P,L,S,G,Q,A,E,H,W,Y,N,F,M		24	S	SER:24:A	3.380	1	1.768, 3.381	3.1	e		93/103	L,R,S,G,Q,A,E,H,W,D,Y,N,F,M,P,T
25	A	ALA:25:A	3.130	1	1.523, 3.130	3.1	e		97/150	A,E,D,L,I,V,M,Y,Q,F,S,R,T,P,C,K,G,H,N			25	A	ALA:25:A	0.658	4	0.174, 0.793	5.4	e		50/55	Q,A,K,E,L		25	A	ALA:25:A	1.036	4	0.456, 1.265	4.3	e		88/152	Q,E,D,A,K,L		25	A	ALA:25:A	0.813	4	0.360, 1.189	5.3	e		88/103	Q,A,K,E,L,D
26	H	HIS:26:A	0.708	4	0.365, 0.961	4.4	b		99/150	H,A,Y,M,L,S,W,P,V,F,D,Q,R,N			26	H	HIS:26:A	-0.799	9	-0.861, -0.775	9.9	b	s	50/55	H		26	H	HIS:26:A	-0.827	9	-0.991, -0.734	9.8	b	s	88/152	H,Y		26	H	HIS:26:A	-0.713	9	-0.825, -0.642	9.8	b	s	88/103	H,Y
27	Q	GLN:27:A	1.469	3	0.961, 1.523	4.3	e		100/150	Q,D,E,S,K,R,V,T,A,N,I			27	Q	GLN:27:A	1.071	4	0.535, 1.150	4.3	e		50/55	T,N,A,S,V,E,Q,K		27	Q	GLN:27:A	1.012	4	0.456, 1.265	4.3	e		93/152	Q,T,N,A,S,V,E,K		27	Q	GLN:27:A	0.851	4	0.360, 1.189	5.3	e		93/103	T,N,A,S,V,E,Q,K
28	V	VAL:28:A	0.055	5	-0.201, 0.176	6.5	b		102/150	V,I,M,S,L,T,F,R,Q,P			28	V	VAL:28:A	0.374	4	-0.073, 0.535	5.4	b		50/55	I,M,V		28	V	VAL:28:A	0.456	4	0.026, 0.659	5.4	b		125/152	L,P,I,T,R,M,V		28	V	VAL:28:A	0.072	5	-0.247, 0.196	6.5	b		93/103	I,M,V
29	P	PRO:29:A	0.971	4	0.365, 1.523	4.3	e		104/150	P,M,S,R,H,E,D,V,I,A,T,N			29	P	PRO:29:A	-0.765	9	-0.857, -0.729	9.9	e	f	50/55	P		29	P	PRO:29:A	-0.438	7	-0.734, -0.263	8.6	e		125/152	A,P,S		29	P	PRO:29:A	-0.797	9	-0.882, -0.764	9.9	e	f	93/103	P
30	E	GLU:30:A	1.613	3	0.961, 1.523	4.3	e		108/150	E,D,N,S,H,R,Y,T,A,L			30	E	GLU:30:A	-0.324	7	-0.557, -0.171	8.6	e		50/55	K,P,E,D		30	E	GLU:30:A	1.006	4	0.456, 1.265	4.3	e		125/152	A,G,T,E,D,S,I,K,P		30	E	GLU:30:A	0.254	5	-0.159, 0.564	6.4	e		93/103	K,P,E,D
31	K	LYS:31:A	1.449	3	0.961, 1.523	4.3	e		113/150	K,R,W,S,H,Y,N,V,D,T,A,E,Q,C,G			31	K	LYS:31:A	0.919	4	0.336, 1.150	5.3	e		50/55	E,H,Y,N,K,R,D		31	K	LYS:31:A	1.223	3	0.659, 1.809	4.3	e		124/152	R,P,Q,S,E,H,Y,N,K,D		31	K	LYS:31:A	0.934	4	0.360, 1.189	5.3	e		93/103	E,H,Y,N,K,R,D
32	L	LEU:32:A	1.049	3	0.613, 1.523	4.3	b		124/150	L,K,S,E,F,A,V,R,T,I,P,Q,D,M			32	L	LEU:32:A	-0.779	9	-0.857, -0.753	9.9	b	s	50/55	L		32	L	LEU:32:A	-0.609	8	-0.849, -0.476	9.7	b		96/152	R,L,W		32	L	LEU:32:A	-0.809	9	-0.882, -0.787	9.9	b	s	93/103	L
33	K	LYS:33:A	1.611	3	0.961, 1.523	4.3	e		132/150	K,R,S,D,A,Q,L,E,H,T,C,V,P,Y			33	K	LYS:33:A	0.291	5	-0.073, 0.535	5.4	e		50/55	E,Q,K,R		33	K	LYS:33:A	0.178	5	-0.177, 0.456	6.4	e		123/152	R,K,E,Q		33	K	LYS:33:A	0.210	5	-0.159, 0.360	6.5	e		93/103	E,Q,K,R
34	K	LYS:34:A	1.494	3	0.961, 1.523	4.3	e		137/150	K,D,S,H,N,A,V,G,Y,I,E,Q,T,P			34	K	LYS:34:A	1.906	2	0.793, 1.720	4.3	e		50/55	Q,A,S,C,K,N		34	K	LYS:34:A	2.770	1	1.265, 3.287	3.1	e		123/152	H,Q,L,D,S,T,R,A,C,K,N		34	K	LYS:34:A	2.312	2	1.189, 3.381	3.1	e		93/103	Q,A,S,C,K,N,D,H,T
35	V	VAL:35:A	1.074	3	0.613, 1.523	4.3	b		140/150	V,I,A,S,G,M,E,K,R,D,Q,L,P,H,T			35	V	VAL:35:A	0.160	5	-0.171, 0.336	6.5	b		50/55	I,V,M		35	V	VAL:35:A	0.359	5	-0.081, 0.659	5.4	b		124/152	Y,V,H,F,I,M		35	V	VAL:35:A	-0.018	5	-0.324, 0.196	7.5	b		93/103	I,V,M
36	E	GLU:36:A	3.124	1	1.523, 3.130	3.1	e		144/150	E,P,D,G,T,S,N,A,K,V,I,Q,H,R			36	E	GLU:36:A	1.365	3	0.535, 1.720	4.3	e		50/55	S,A,P,R,E,I,L,G		36	E	GLU:36:A	1.278	3	0.659, 1.809	4.3	e		124/152	S,G,A,P,R,E,I,L		36	E	GLU:36:A	1.721	3	0.827, 1.768	4.3	e		93/103	S,A,P,R,E,I,L,G
37	T	THR:37:A	3.070	1	1.523, 3.130	3.1	e		144/150	T,R,S,D,E,V,K,Q,N,G,P,A,H,L			37	T	THR:37:A	0.788	4	0.336, 1.150	5.3	e		50/55	K,T,I,N,V,S,Q,D,E		37	T	THR:37:A	1.215	3	0.659, 1.809	4.3	e		124/152	E,T,D,K,R,S,I,N,V,Q		37	T	THR:37:A	0.619	4	0.196, 0.827	5.4	e		93/103	K,T,I,N,V,S,Q,D,E
38	D	ASP:38:A	1.555	3	0.961, 1.523	4.3	e		145/150	D,H,A,S,E,P,N,V,K,Q,G,T,R			38	D	ASP:38:A	-0.046	5	-0.332, 0.174	7.5	e		50/55	E,D,A,S		38	D	ASP:38:A	0.330	5	-0.081, 0.659	5.4	e		124/152	A,S,L,E,D		38	D	ASP:38:A	0.155	5	-0.159, 0.360	6.5	e		93/103	E,D,A,S
39	K	LYS:39:A	1.840	2	0.961, 1.523	4.3	e		145/150	K,P,A,E,D,L,Q,S,R,G,H,T,M,V			39	K	LYS:39:A	0.098	5	-0.257, 0.336	6.5	e		50/55	K,R,Q,T,N,A,E		39	K	LYS:39:A	0.106	5	-0.263, 0.289	6.5	e		80/152	D,K,R,Q,T,N,A,E		39	K	LYS:39:A	0.172	5	-0.159, 0.360	6.5	e		93/103	K,R,Q,T,N,A,E,P
40	D	ASP:40:A	0.280	5	0.026, 0.365	5.4	e		145/150	D,N,S,K,H,E,G,F			40	D	ASP:40:A	0.008	5	-0.332, 0.174	7.5	e		50/55	D,N,K,T		40	D	ASP:40:A	0.232	5	-0.177, 0.456	6.4	e		123/152	D,S,N,K,T		40	D	ASP:40:A	0.137	5	-0.247, 0.360	6.5	e		93/103	D,N,K,T,S
41	P	PRO:41:A	-0.090	6	-0.364, 0.026	7.5	b		146/150	P,V,F,T,S,L,H			41	P	PRO:41:A	-0.765	9	-0.857, -0.729	9.9	b	s	50/55	P		41	P	PRO:41:A	-0.935	9	-1.047, -0.882	9.9	b	s	123/152	P		41	P	PRO:41:A	-0.797	9	-0.882, -0.764	9.9	b	s	93/103	P
42	E	GLU:42:A	0.525	4	0.176, 0.613	5.4	e		146/150	E,R,K,N,L,S,G,Y,T,D,P			42	E	GLU:42:A	0.408	4	-0.073, 0.793	5.4	e		50/55	K,P,S,E,R,G,N		42	E	GLU:42:A	0.546	4	0.148, 0.915	5.4	e		123/152	N,R,A,S,K,P,E,G		42	E	GLU:42:A	0.336	5	-0.058, 0.564	5.4	e		93/103	K,P,S,E,R,G,N
43	F	PHE:43:A	-0.753	9	-0.799, -0.723	9.9	b	s	146/150	F,L			43	F	PHE:43:A	-0.241	6	-0.557, -0.073	8.5	b		50/55	F,L		43	F	PHE:43:A	-0.491	7	-0.734, -0.341	8.7	b		123/152	F,L		43	F	PHE:43:A	-0.343	7	-0.602, -0.159	8.6	b		93/103	F,L
44	S	SER:44:A	-0.170	6	-0.364, -0.098	7.6	b		146/150	S,F,Y,T,N,C			44	S	SER:44:A	-0.499	8	-0.672, -0.398	9.7	b		50/55	S,A		44	S	SER:44:A	-0.391	7	-0.642, -0.263	8.6	b		124/152	F,S,A		44	S	SER:44:A	-0.412	7	-0.602, -0.324	8.7	b		93/103	S,A,F
45	E	GLU:45:A	1.140	3	0.613, 1.523	4.3	e		146/150	E,D,K,S,N,R,T,G,H,Q,A			45	E	GLU:45:A	0.846	4	0.336, 1.150	5.3	e		50/55	K,Q,E,S,A,D,N,H		45	E	GLU:45:A	0.938	4	0.456, 1.265	4.3	e		124/152	K,N,D,R,Q,E,S,A,H		45	E	GLU:45:A	0.791	4	0.360, 1.189	5.3	e		93/103	K,Q,E,S,A,D,N,H
46	M	MET:46:A	-0.634	9	-0.702, -0.577	9.8	b	s	149/150	M,N,S,Q,T			46	M	MET:46:A	-0.713	9	-0.823, -0.672	9.9	b	s	53/55	M,I		46	M	MET:46:A	-0.658	8	-0.813, -0.536	9.7	b		133/152	M,T,Y,A,I		46	M	MET:46:A	-0.755	9	-0.840, -0.710	9.9	b	s	96/103	M,I
47	V	VAL:47:A	-0.750	9	-0.791, -0.723	9.9	b	s	150/150	V,I			47	V	VAL:47:A	-0.297	7	-0.557, -0.171	8.6	b		53/55	I,V		47	V	VAL:47:A	-0.471	7	-0.690, -0.341	8.7	b		133/152	V,I		47	V	VAL:47:A	-0.401	7	-0.602, -0.247	8.6	b		96/103	I,V
48	L	LEU:48:A	-0.265	6	-0.429, -0.201	7.6	e		150/150	L,E,P,D,G			48	L	LEU:48:A	0.575	4	0.174, 0.793	5.4	e		53/55	Q,E,L,M,S,A		48	L	LEU:48:A	0.289	5	-0.081, 0.456	5.4	e		132/152	E,D,Q,L,M,S,A		48	L	LEU:48:A	0.409	4	0.059, 0.564	5.4	e		96/103	Q,E,L,M,S,A
49	Y	TYR:49:A	0.297	5	0.026, 0.365	5.4	b		150/150	Y,G,F,L,A,M,E,K,N,V,H			49	Y	TYR:49:A	-0.605	8	-0.775, -0.510	9.8	b		53/55	Y,F		49	Y	TYR:49:A	0.260	5	-0.177, 0.456	6.4	b		132/152	G,Y,L,D,I,S,F		49	Y	TYR:49:A	-0.504	8	-0.710, -0.393	9.7	b		96/103	Y,F,L
50	Y	TYR:50:A	-0.557	8	-0.677, -0.485	9.8	b		150/150	Y,F,N			50	Y	TYR:50:A	-0.245	6	-0.557, -0.073	8.5	b		53/55	F,C,Y,N		50	Y	TYR:50:A	-0.354	7	-0.642, -0.177	8.6	b		133/152	F,L,C,Y,N		50	Y	TYR:50:A	-0.336	7	-0.602, -0.159	8.6	b		96/103	F,C,Y,N
51	Y	TYR:51:A	-0.380	7	-0.534, -0.288	8.7	b		150/150	Y,F,V			51	Y	TYR:51:A	-0.606	8	-0.775, -0.510	9.8	b		53/55	F,Y		51	Y	TYR:51:A	-0.360	7	-0.642, -0.177	8.6	b		133/152	F,W,L,Y		51	Y	TYR:51:A	-0.656	8	-0.807, -0.558	9.8	b		96/103	F,Y
52	H	HIS:52:A	-0.533	8	-0.648, -0.485	9.8	b		150/150	H,D,E,N			52	H	HIS:52:A	-0.800	9	-0.861, -0.775	9.9	b	s	53/55	H		52	H	HIS:52:A	-0.872	9	-0.991, -0.813	9.9	b	s	133/152	D,H		52	H	HIS:52:A	-0.828	9	-0.882, -0.807	9.9	b	s	96/103	H
53	K	LYS:53:A	-0.054	5	-0.288, 0.026	7.5	e		150/150	K,R,N			53	K	LYS:53:A	-0.071	5	-0.398, 0.174	7.5	e		53/55	K,S,A,R,Q		53	K	LYS:53:A	-0.125	6	-0.411, 0.026	7.5	e		132/152	R,C,K,S,A,Q		53	K	LYS:53:A	-0.081	5	-0.393, 0.059	7.5	e		96/103	K,S,A,R,Q
54	A	ALA:54:A	-0.167	6	-0.364, -0.098	7.6	b		150/150	A,S,G			54	A	ALA:54:A	-0.689	9	-0.809, -0.638	9.9	b	s	53/55	A,S		54	A	ALA:54:A	-0.512	7	-0.734, -0.341	8.7	b		132/152	G,A,S		54	A	ALA:54:A	-0.622	8	-0.764, -0.558	9.8	b		96/103	A,S,G
55	A	ALA:55:A	-0.185	6	-0.364, -0.098	7.6	b		150/150	A,C,S,W,V,T			55	A	ALA:55:A	-0.665	9	-0.793, -0.600	9.8	b	s	53/55	C,A		55	A	ALA:55:A	-0.467	7	-0.734, -0.341	8.7	b		132/152	A,C,I,T		55	A	ALA:55:A	-0.697	9	-0.825, -0.642	9.8	b	s	96/103	C,A
56	Q	GLN:56:A	1.153	3	0.613, 1.523	4.3	e		150/150	Q,S,G,M,T,K,I,A,V,N,R,E,C			56	Q	GLN:56:A	-0.096	6	-0.398, 0.041	7.5	e		53/55	V,L,I,Q,R,C,K		56	Q	GLN:56:A	-0.254	6	-0.536, -0.081	7.5	e		132/152	S,Q,G,V,L,I,R,C,K		56	Q	GLN:56:A	-0.255	6	-0.509, -0.159	8.6	e		96/103	V,L,I,Q,R,C,K
57	T	THR:57:A	0.572	4	0.176, 0.613	5.4	e		150/150	T,I,V,L,M,A,C,Y			57	T	THR:57:A	0.888	4	0.336, 1.150	5.3	e		53/55	K,V,L,A,T,I		57	T	THR:57:A	0.457	4	0.026, 0.659	5.4	e		132/152	I,L,K,V,A,T		57	T	THR:57:A	0.627	4	0.196, 0.827	5.4	e		96/103	K,V,L,A,T,I
58	M	MET:58:A	0.334	5	0.026, 0.365	5.4	b		150/150	M,V,A,I,C,L,S			58	M	MET:58:A	-0.465	8	-0.672, -0.332	9.7	b		53/55	L,M		58	M	MET:58:A	-0.165	6	-0.476, 0.026	7.5	b		132/152	V,C,A,S,M,L		58	M	MET:58:A	-0.189	6	-0.454, -0.058	7.5	b		96/103	L,M,C,A,S
59	E	GLU:59:A	-0.407	7	-0.534, -0.288	8.7	b		150/150	E,Q,A,K,M,G			59	E	GLU:59:A	-0.811	9	-0.861, -0.793	9.9	b	s	53/55	E		59	E	GLU:59:A	-0.906	9	-1.012, -0.849	9.9	b	s	132/152	E,G		59	E	GLU:59:A	-0.838	9	-0.882, -0.825	9.9	b	s	96/103	E
60	P	PRO:60:A	0.327	5	0.026, 0.365	5.4	e		150/150	P,S,D,E,N			60	P	PRO:60:A	0.278	5	-0.171, 0.535	6.4	e		53/55	P,K,E,S,N		60	P	PRO:60:A	0.858	4	0.289, 1.265	5.3	e		132/152	D,E,N,T,P,K,S		60	P	PRO:60:A	1.030	4	0.360, 1.189	5.3	e		96/103	P,K,E,S,N,D,T
61	A	ALA:61:A	0.586	4	0.176, 0.613	5.4	e		150/150	A,K,Q,S,N,R,H,T,P			61	A	ALA:61:A	1.151	3	0.535, 1.720	4.3	e		53/55	R,Q,M,E,A,S,D,N,T		61	A	ALA:61:A	1.162	3	0.659, 1.265	4.3	e		132/152	K,R,S,Q,M,E,A,D,N,T		61	A	ALA:61:A	1.395	3	0.827, 1.768	4.3	e		96/103	R,Q,M,E,A,S,D,N,T,K
62	L	LEU:62:A	-0.616	8	-0.702, -0.577	9.8	b		150/150	L,F,M			62	L	LEU:62:A	-0.620	8	-0.793, -0.510	9.8	b		53/55	L,M		62	L	LEU:62:A	-0.676	8	-0.882, -0.536	9.7	b		132/152	L,M		62	L	LEU:62:A	-0.528	8	-0.710, -0.393	9.7	b		96/103	L,M
63	L	LEU:63:A	-0.317	7	-0.485, -0.201	8.6	e		150/150	L,V,M,I,R,A			63	L	LEU:63:A	0.587	4	0.174, 0.793	5.4	e		53/55	L,I,V,N		63	L	LEU:63:A	0.832	4	0.289, 1.265	5.3	e		132/152	V,I,L,N		63	L	LEU:63:A	0.988	4	0.360, 1.189	5.3	e		96/103	L,I,V,N
64	K	LYS:64:A	1.275	3	0.613, 1.523	4.3	e		150/150	K,E,H,C,Q,D,S,A,R,G,N			64	K	LYS:64:A	0.185	5	-0.171, 0.336	6.5	e		53/55	E,Q,D,K,R,A		64	K	LYS:64:A	0.494	4	0.026, 0.659	5.4	e		133/152	E,D,C,H,A,K,Q,R		64	K	LYS:64:A	0.388	4	-0.058, 0.564	5.4	e		96/103	E,Q,D,K,R,A,C
65	E	GLU:65:A	1.154	3	0.613, 1.523	4.3	e		150/150	E,D,A,N,G,S,T,K,Q			65	E	GLU:65:A	-0.068	5	-0.398, 0.174	7.5	e		53/55	Y,S,E,Q,D		65	E	GLU:65:A	0.279	5	-0.081, 0.456	5.4	e		134/152	D,E,L,F,G,Y,S,Q		65	E	GLU:65:A	0.124	5	-0.247, 0.360	6.5	e		96/103	Y,S,E,Q,D
66	M	MET:66:A	0.400	4	0.026, 0.613	5.4	b		150/150	M,V,L,I,W,F,Y			66	M	MET:66:A	-0.432	7	-0.638, -0.332	9.7	b		53/55	L,M		66	M	MET:66:A	-0.257	6	-0.536, -0.081	7.5	b		134/152	L,M,S,I,V		66	M	MET:66:A	-0.532	8	-0.710, -0.454	9.7	b		96/103	L,M
67	E	GLU:67:A	2.967	1	1.523, 3.130	3.1	e		37/150	E,G,A,S,N,Q,H,I,K,P			67	E	GLU:67:A	0.453	4	0.041, 0.793	5.4	e		53/55	K,S,N,E,D,G,I,A		67	E	GLU:67:A	0.552	4	0.148, 0.915	5.4	e		134/152	R,K,N,S,E,D,G,I,A		67	E	GLU:67:A	0.248	5	-0.159, 0.564	6.4	e		96/103	K,S,N,E,D,G,I,A
68	K	LYS:68:A	0.683	4	0.365, 0.961	4.4	e		150/150	K,R,A,S,P,G,H,D,V,I			68	K	LYS:68:A	-0.296	7	-0.557, -0.171	8.6	e		53/55	K,Q,V		68	K	LYS:68:A	0.415	4	0.026, 0.659	5.4	e		135/152	R,K,S,Q,P,V		68	K	LYS:68:A	-0.180	6	-0.454, -0.058	7.5	e		53/103	K,Q,V
69	Y	TYR:69:A	2.698	1	1.523, 3.130	3.1	e		23/150	Y,G,K,A,V,N,M			69	Y	TYR:69:A	-0.432	7	-0.672, -0.257	9.6	e		53/55	Y,N,H		69	Y	TYR:69:A	1.510	3	0.915, 1.809	4.3	e		135/152	E,I,S,A,T,L,M,D,Q,G,Y,N,H		69	Y	TYR:69:A	-0.436	7	-0.678, -0.324	9.7	e		53/103	Y,N,H
70	P	PRO:70:A	1.462	3	0.961, 1.523	4.3	e		149/150	P,S,G,T,E,H,A,N,D,I,M,Q,K,V,L			70	P	PRO:70:A	0.765	4	0.174, 1.150	5.3	e		53/55	P,T,S,A,L		70	P	PRO:70:A	0.729	4	0.289, 0.915	5.4	e		135/152	S,T,P,C,A,L		70	P	PRO:70:A	0.984	4	0.360, 1.189	5.3	e		96/103	P,T,S,A,L,G
71	H	HIS:71:A	1.053	3	0.613, 1.523	4.3	e		150/150	H,K,R,Q,N,P,T,L,S			71	H	HIS:71:A	1.525	3	0.793, 1.720	4.3	e		53/55	Q,T,L,S,N,Y,R,H,D,K,W		71	H	HIS:71:A	2.252	2	1.265, 3.287	3.1	e		54/152	C,Q,T,L,S,N,Y,R,H,D,K,W		71	H	HIS:71:A	1.558	3	0.827, 1.768	4.3	e		96/103	Q,T,L,S,N,Y,R,H,D,K,W
72	M	MET:72:A	1.312	3	0.613, 1.523	4.3	b		150/150	M,E,V,A,I,L,S,T,D,G,K,H,Q			72	M	MET:72:A	0.284	5	-0.073, 0.535	5.4	b		54/55	M,L,W,F,A		72	M	MET:72:A	0.667	4	0.148, 0.915	5.4	b		55/152	W,M,L,F,A		72	M	MET:72:A	1.292	3	0.564, 1.768	4.3	b		97/103	M,L,W,F,A,I,S,T,D
73	K	LYS:73:A	0.827	4	0.365, 0.961	4.4	e		150/150	K,T,S,P,D,N			73	K	LYS:73:A	0.483	4	0.041, 0.793	5.4	e		54/55	S,A,T,K,Q,D,E		73	K	LYS:73:A	0.756	4	0.289, 1.265	5.3	e		55/152	C,S,A,T,K,Q,D,E		73	K	LYS:73:A	0.359	5	-0.058, 0.564	5.4	e		97/103	S,A,T,K,Q,D,E
74	P	PRO:74:A	3.130	1	1.523, 3.130	3.1	e		150/150	P,V,I,L,E,D,A,T,M,Q,R,S,K,N,H			74	P	PRO:74:A	1.546	3	0.793, 1.720	4.3	e		54/55	A,E,P,K,V,N,D,S		74	P	PRO:74:A	3.151	1	1.809, 3.287	3.1	e		134/152	E,A,L,M,V,R,D,K,P,N,S		74	P	PRO:74:A	3.116	1	1.768, 3.381	3.1	e		97/103	A,E,P,K,V,N,D,S,L,M,R
75	E	GLU:75:A	1.196	3	0.613, 1.523	4.3	e		150/150	E,D,A,R,Q,V,N,K,S			75	E	GLU:75:A	-0.100	6	-0.398, 0.041	7.5	e		54/55	A,E,D,K,S,G		75	E	GLU:75:A	0.117	5	-0.263, 0.289	6.5	e		134/152	E,D,V,A,K,S,G		75	E	GLU:75:A	0.102	5	-0.247, 0.360	6.5	e		97/103	A,E,D,K,S,G
76	E	GLU:76:A	0.941	4	0.365, 0.961	4.4	e		150/150	E,D,Q,A,T,R,V,M,N,L			76	E	GLU:76:A	0.893	4	0.336, 1.150	5.3	e		54/55	G,N,R,K,Q,D,E,A,W,S		76	E	GLU:76:A	0.652	4	0.148, 0.915	5.4	e		134/152	Q,E,A,D,G,N,R,K,W,S		76	E	GLU:76:A	0.998	4	0.360, 1.189	5.3	e		97/103	G,N,R,K,Q,D,E,A,W,S
77	R	ARG:77:A	-0.338	7	-0.485, -0.288	8.7	b		150/150	R,K,Q			77	R	ARG:77:A	-0.252	6	-0.510, -0.073	8.5	b		53/55	R,K,V		77	R	ARG:77:A	-0.111	5	-0.411, 0.026	7.5	b		134/152	K,P,R,V		77	R	ARG:77:A	-0.242	6	-0.509, -0.058	8.5	b		96/103	R,K,V
78	Q	GLN:78:A	1.254	3	0.613, 1.523	4.3	e		150/150	Q,T,R,K,M,A,H,L,V,I,N			78	Q	GLN:78:A	0.666	4	0.174, 0.793	5.4	e		53/55	K,M,A,I,E,Q,S		78	Q	GLN:78:A	0.909	4	0.456, 1.265	4.3	e		134/152	R,K,Q,N,M,A,I,E,S		78	Q	GLN:78:A	0.677	4	0.196, 0.827	5.4	e		96/103	K,M,A,I,E,Q,S,R
79	A	ALA:79:A	1.467	3	0.961, 1.523	4.3	e		150/150	A,K,N,E,S,H,V,Q,G,L,T,R,I,M			79	A	ALA:79:A	0.678	4	0.174, 1.150	5.3	e		53/55	K,A,H,S,N,R,Q,G,E		79	A	ALA:79:A	0.846	4	0.289, 1.265	5.3	e		134/152	N,K,Q,A,L,D,H,S,R,G,E		79	A	ALA:79:A	0.684	4	0.196, 0.827	5.4	e		96/103	K,A,H,S,N,R,Q,G,E
80	R	ARG:80:A	-0.006	5	-0.201, 0.176	6.5	e		150/150	R,K,T,V,L,Q,F,I			80	R	ARG:80:A	-0.798	9	-0.861, -0.775	9.9	e	f	53/55	R		80	R	ARG:80:A	-0.200	6	-0.476, 0.026	7.5	e		134/152	R,K,Q,W,C		80	R	ARG:80:A	-0.485	8	-0.678, -0.393	9.7	e	f	96/103	R,K
81	V	VAL:81:A	-0.636	9	-0.702, -0.577	9.8	b	s	150/150	V,T,A,I			81	V	VAL:81:A	-0.804	9	-0.861, -0.793	9.9	b	s	53/55	V		81	V	VAL:81:A	-0.674	8	-0.849, -0.591	9.8	b		133/152	V,L,G,M		81	V	VAL:81:A	-0.832	9	-0.882, -0.807	9.9	b	s	96/103	V
82	T	THR:82:A	1.030	4	0.613, 0.961	4.4	b		150/150	T,K,R,A,Q,N,H,E,S,C			82	T	THR:82:A	0.464	4	0.041, 0.793	5.4	b		53/55	Q,E,S,T,N,A,R		82	T	THR:82:A	0.653	4	0.148, 0.915	5.4	b		133/152	R,K,V,H,C,Q,E,S,T,N,A		82	T	THR:82:A	0.380	4	-0.058, 0.564	5.4	b		96/103	Q,E,S,T,N,A,R,K
83	A	ALA:83:A	-0.585	8	-0.702, -0.534	9.8	e	f	150/150	A,G,N			83	A	ALA:83:A	-0.286	7	-0.557, -0.171	8.6	e		53/55	T,A,G		83	A	ALA:83:A	-0.327	6	-0.591, -0.177	8.6	e		133/152	G,T,A		83	A	ALA:83:A	-0.220	6	-0.509, -0.058	8.5	e		96/103	T,A,G
84	I	ILE:84:A	-0.612	8	-0.702, -0.577	9.8	b		150/150	I,L,Y,V			84	I	ILE:84:A	-0.593	8	-0.753, -0.510	9.8	b		53/55	I,M,L		84	I	ILE:84:A	-0.724	8	-0.882, -0.642	9.8	b		133/152	I,V,M,L		84	I	ILE:84:A	-0.651	8	-0.787, -0.558	9.8	b		96/103	I,M,L
85	L	LEU:85:A	-0.525	8	-0.648, -0.429	9.7	b		150/150	L,M,I,F			85	L	LEU:85:A	-0.604	8	-0.775, -0.510	9.8	b		53/55	I,L		85	L	LEU:85:A	-0.675	8	-0.882, -0.536	9.7	b		134/152	L,M,I		85	L	LEU:85:A	-0.662	9	-0.807, -0.602	9.8	b	s	96/103	I,L
86	N	ASN:86:A	1.461	3	0.961, 1.523	4.3	e		150/150	N,M,L,R,K,A,T,Q,I,G,H,S,E,D			86	N	ASN:86:A	0.687	4	0.174, 0.793	5.4	e		53/55	H,Q,R,K,D,N,L		86	N	ASN:86:A	0.781	4	0.289, 0.915	5.4	e		134/152	R,M,G,H,Q,K,D,N,L		86	N	ASN:86:A	0.528	4	0.059, 0.827	5.4	e		96/103	H,Q,R,K,D,N,L,M
87	L	LEU:87:A	0.554	4	0.176, 0.613	5.4	e		150/150	L,G,I,S,V,M,Y,H,F,T,C,A,N			87	L	LEU:87:A	0.586	4	0.041, 0.793	5.4	e		53/55	L,I,M,R,F		87	L	LEU:87:A	0.318	5	-0.081, 0.659	5.4	e		134/152	I,L,V,M,R,F		87	L	LEU:87:A	0.403	4	-0.058, 0.564	5.4	e		96/103	L,I,M,R,F
88	L	LEU:88:A	-0.268	6	-0.429, -0.201	7.6	b		150/150	L,M,I,V			88	L	LEU:88:A	0.317	5	-0.073, 0.535	5.4	b		54/55	I,V,M,L		88	L	LEU:88:A	0.137	5	-0.177, 0.289	6.5	b		135/152	I,M,T,L,V		88	L	LEU:88:A	0.195	5	-0.159, 0.360	6.5	b		97/103	I,V,M,L
89	G	GLY:89:A	-0.306	7	-0.485, -0.201	8.6	e		150/150	G,Q,E,K,R			89	G	GLY:89:A	0.118	5	-0.332, 0.336	7.5	e		54/55	C,E,S,G,A		89	G	GLY:89:A	0.033	5	-0.341, 0.289	7.5	e		136/152	K,Q,D,C,E,S,G,A		89	G	GLY:89:A	0.038	5	-0.324, 0.196	7.5	e		97/103	C,E,S,G,A,Q
90	S	SER:90:A	0.225	5	-0.098, 0.365	6.4	e		150/150	S,P,N,Q,E,H,G,K,T,A			90	S	SER:90:A	0.538	4	0.041, 0.793	5.4	e		54/55	G,N,S,C,I,V,A,R,Y		90	S	SER:90:A	0.388	4	0.026, 0.659	5.4	e		136/152	P,G,N,S,C,I,V,A,R,Y		90	S	SER:90:A	0.540	4	0.059, 0.827	5.4	e		97/103	G,N,S,C,I,V,A,R,Y,P
91	V	VAL:91:A	-0.539	8	-0.648, -0.485	9.8	e	f	150/150	V,C,P			91	V	VAL:91:A	-0.284	7	-0.557, -0.171	8.6	e		54/55	E,A,N,T,V		91	V	VAL:91:A	-0.207	6	-0.536, 0.026	7.5	e		136/152	C,T,E,A,N,V		91	V	VAL:91:A	-0.219	6	-0.509, -0.058	8.5	e		97/103	E,A,N,T,V,C
92	S	SER:92:A	-0.284	7	-0.429, -0.201	7.6	e		150/150	S,D,N,H,A,Q			92	S	SER:92:A	0.002	5	-0.332, 0.174	7.5	e		54/55	A,S,T,N,C		92	S	SER:92:A	-0.067	5	-0.341, 0.148	7.5	e		136/152	N,D,A,S,T,C		92	S	SER:92:A	0.022	5	-0.247, 0.196	6.5	e		97/103	A,S,T,N,C,D
93	T	THR:93:A	-0.027	5	-0.201, 0.026	6.5	e		150/150	T,H,S,Q,Y,A,N,K,C			93	T	THR:93:A	-0.075	5	-0.398, 0.174	7.5	e		53/55	N,S,T,A,C		93	T	THR:93:A	0.137	5	-0.177, 0.289	6.5	e		137/152	H,E,T,Q,N,S,A,C		93	T	THR:93:A	0.050	5	-0.247, 0.196	6.5	e		98/103	N,S,T,A,C,H,E
94	S	SER:94:A	-0.152	6	-0.364, -0.098	7.6	e		150/150	S,I,V,L,M,T			94	S	SER:94:A	0.091	5	-0.257, 0.336	6.5	e		53/55	T,L,S,A,C,M		94	S	SER:94:A	0.358	5	-0.081, 0.659	5.4	e		138/152	V,I,L,A,C,T,S,M		94	S	SER:94:A	0.170	5	-0.159, 0.360	6.5	e		98/103	T,L,S,A,C,M,I
95	V	VAL:95:A	0.348	4	0.026, 0.613	5.4	e		150/150	V,L,I,F,R,M,C			95	V	VAL:95:A	0.001	5	-0.332, 0.174	7.5	e		53/55	I,L,V		95	V	VAL:95:A	0.038	5	-0.341, 0.289	7.5	e		138/152	L,I,H,V		95	V	VAL:95:A	0.079	5	-0.247, 0.360	6.5	e		98/103	I,L,V
96	E	GLU:96:A	0.057	5	-0.201, 0.176	6.5	e		150/150	E,S,Q,A,Y,H,N,K			96	E	GLU:96:A	-0.704	9	-0.809, -0.638	9.9	e	f	53/55	E,Q		96	E	GLU:96:A	-0.385	7	-0.591, -0.263	8.6	e		138/152	S,E,G,P,N,Q		96	E	GLU:96:A	-0.560	8	-0.710, -0.454	9.7	e	f	98/103	E,Q,G,S
97	V	VAL:97:A	0.779	4	0.365, 0.961	4.4	b		150/150	V,I,T,L,M,F			97	V	VAL:97:A	-0.428	7	-0.638, -0.332	9.7	b		53/55	V,I,F		97	V	VAL:97:A	0.002	5	-0.341, 0.148	7.5	b		138/152	L,V,I,P,F		97	V	VAL:97:A	-0.402	7	-0.602, -0.247	8.6	b		98/103	V,I,F,L
98	N	ASN:98:A	0.987	4	0.613, 0.961	4.4	e		150/150	N,A,T,S,Q,C,V,R,H,G			98	N	ASN:98:A	0.571	4	0.174, 0.793	5.4	e		53/55	R,Q,T,N,S		98	N	ASN:98:A	1.119	3	0.659, 1.265	4.3	e		137/152	S,C,T,A,F,P,R,Q,N		98	N	ASN:98:A	0.720	4	0.196, 0.827	5.4	e		97/103	R,Q,T,N,S,A,F
99	F	PHE:99:A	-0.754	9	-0.799, -0.723	9.9	b	s	150/150	F,Y			99	F	PHE:99:A	-0.778	9	-0.857, -0.753	9.9	b	s	53/55	F		99	F	PHE:99:A	-0.527	7	-0.775, -0.341	8.7	b		137/152	F,L,P		99	F	PHE:99:A	-0.658	9	-0.807, -0.558	9.8	b	s	97/103	F,L
100	P	PRO:100:A	-0.783	9	-0.814, -0.771	9.9	e	f	150/150	P			100	P	PRO:100:A	-0.573	8	-0.775, -0.458	9.8	e	f	53/55	P,S		100	P	PRO:100:A	-0.315	6	-0.642, -0.081	8.5	e		137/152	P,A,S		100	P	PRO:100:A	-0.459	7	-0.678, -0.324	9.7	e		97/103	P,S,A
101	I	ILE:101:A	-0.046	5	-0.288, 0.026	7.5	b		150/150	I,L,V			101	I	ILE:101:A	-0.282	7	-0.510, -0.171	8.6	b		53/55	V,F,I,L		101	I	ILE:101:A	-0.102	5	-0.411, 0.148	7.5	b		136/152	I,L,Q,V,F		101	I	ILE:101:A	-0.214	6	-0.454, -0.058	7.5	b		97/103	V,F,I,L
102	V	VAL:102:A	0.490	4	0.176, 0.613	5.4	e		150/150	V,R,K,L,Q,C			102	V	VAL:102:A	1.157	3	0.535, 1.720	4.3	e		53/55	M,R,I,V,L,A,K,Y,H		102	V	VAL:102:A	1.203	3	0.659, 1.809	4.3	e		136/152	R,K,Q,M,I,V,L,A,Y,H		102	V	VAL:102:A	1.071	4	0.564, 1.189	4.3	e		97/103	M,R,I,V,L,A,K,Y,H
103	R	ARG:103:A	-0.510	8	-0.615, -0.429	8.7	e	f	150/150	R,K,L			103	R	ARG:103:A	-0.097	6	-0.398, 0.041	7.5	e		53/55	R,K,N		103	R	ARG:103:A	0.173	5	-0.177, 0.456	6.4	e		136/152	R,F,L,H,K,N		103	R	ARG:103:A	-0.102	6	-0.393, 0.059	7.5	e		97/103	R,K,N,F
104	K	LYS:104:A	-0.706	9	-0.771, -0.677	9.9	e	f	150/150	K,D,E			104	K	LYS:104:A	1.201	3	0.535, 1.720	4.3	e		53/55	D,S,G,E,Q,K,N,T		104	K	LYS:104:A	1.205	3	0.659, 1.809	4.3	e		136/152	D,T,Y,E,N,S,G,Q,K		104	K	LYS:104:A	1.128	3	0.564, 1.768	4.3	e		97/103	D,S,G,E,Q,K,N,T
105	N	ASN:105:A	0.238	5	0.026, 0.365	5.4	e		150/150	N,S,T,D,C,G,A,H			105	N	ASN:105:A	0.616	4	0.174, 0.793	5.4	e		53/55	N,S,D,K		105	N	ASN:105:A	0.535	4	0.148, 0.915	5.4	e		136/152	D,S,A,G,N,K		105	N	ASN:105:A	0.552	4	0.059, 0.827	5.4	e		97/103	N,S,D,K,A
106	G	GLY:106:A	-0.788	9	-0.814, -0.782	9.9	e	f	150/150	G			106	G	GLY:106:A	-0.512	8	-0.753, -0.398	9.7	e	f	51/55	G,S		106	G	GLY:106:A	-0.324	6	-0.642, -0.081	8.5	e		134/152	G,K,P,S		106	G	GLY:106:A	-0.368	7	-0.642, -0.159	8.6	e		95/103	G,S,K
107	T	THR:107:A	1.461	3	0.961, 1.523	4.3	e		150/150	T,N,D,S,C,A,E,V,R,Q,K			107	T	THR:107:A	2.943	1	1.720, 3.313	3.1	e		53/55	Q,V,R,E,S,H,N,T,A		107	T	THR:107:A	2.068	2	1.265, 3.287	3.1	e		136/152	S,D,E,N,C,Q,V,R,H,T,A		107	T	THR:107:A	2.840	1	1.189, 3.381	3.1	e		97/103	Q,V,R,E,S,H,N,T,A,D
108	Y	TYR:108:A	0.438	4	0.026, 0.613	5.4	e		150/150	Y,W,F,I,L,V			108	Y	TYR:108:A	-0.610	8	-0.775, -0.510	9.8	e	f	53/55	Y,I		108	Y	TYR:108:A	-0.344	7	-0.642, -0.177	8.6	e		135/152	W,Y,F,R,X,I		108	Y	TYR:108:A	-0.515	8	-0.710, -0.393	9.7	e	f	97/103	Y,I,F
109	E	GLU:109:A	-0.362	7	-0.534, -0.288	8.7	e		150/150	E,V,T,H,Q,C,F,D			109	E	GLU:109:A	-0.811	9	-0.861, -0.793	9.9	e	f	53/55	E		109	E	GLU:109:A	-0.909	9	-1.012, -0.849	9.9	e	f	134/152	E,K		109	E	GLU:109:A	-0.838	9	-0.882, -0.825	9.9	e	f	96/103	E
110	I	ILE:110:A	0.177	5	-0.098, 0.365	6.4	e		150/150	I,M,V,N,L,T			110	I	ILE:110:A	-0.075	5	-0.398, 0.174	7.5	e		53/55	I,M,L,V		110	I	ILE:110:A	-0.095	5	-0.411, 0.148	7.5	e		134/152	V,M,L,I		110	I	ILE:110:A	-0.013	5	-0.324, 0.196	7.5	e		96/103	I,M,L,V
111	I	ILE:111:A	-0.590	8	-0.677, -0.534	9.8	b		150/150	I,V			111	I	ILE:111:A	-0.340	7	-0.557, -0.171	8.6	b		53/55	L,V,I		111	I	ILE:111:A	-0.634	8	-0.813, -0.536	9.7	b		135/152	I,L,V		111	I	ILE:111:A	-0.437	7	-0.642, -0.324	8.7	b		96/103	L,V,I
112	S	SER:112:A	0.505	4	0.176, 0.613	5.4	e		150/150	S,Q,T,E,L,K,R,H,V,N,D,Y			112	S	SER:112:A	-0.353	7	-0.557, -0.257	8.6	e		53/55	T,S,N		112	S	SER:112:A	-0.324	6	-0.591, -0.177	8.6	e		135/152	E,T,P,H,S,N		112	S	SER:112:A	-0.445	7	-0.642, -0.324	8.7	e		96/103	T,S,N
113	G	GLY:113:A	-0.004	5	-0.288, 0.176	7.5	b		150/150	G,C,A			113	G	GLY:113:A	-0.295	7	-0.600, -0.073	8.5	b		53/55	G,A		113	G	GLY:113:A	-0.553	7	-0.813, -0.411	9.7	b		135/152	G,A		113	G	GLY:113:A	-0.387	7	-0.642, -0.247	8.6	b		96/103	G,A
114	Y	TYR:114:A	0.038	5	-0.201, 0.176	6.5	b		150/150	Y,F,W,V,H			114	Y	TYR:114:A	-0.604	8	-0.775, -0.510	9.8	b		53/55	Y,F		114	Y	TYR:114:A	-0.382	7	-0.642, -0.177	8.6	b		135/152	Y,H,R,C,F		114	Y	TYR:114:A	-0.659	9	-0.807, -0.558	9.8	b	s	96/103	Y,F
115	R	ARG:115:A	-0.799	9	-0.814, -0.799	9.9	b	s	150/150	R			115	R	ARG:115:A	-0.798	9	-0.861, -0.775	9.9	b	s	53/55	R		115	R	ARG:115:A	-0.985	9	-1.059, -0.967	9.9	b	s	135/152	R		115	R	ARG:115:A	-0.827	9	-0.882, -0.807	9.9	b	s	96/103	R
116	S	SER:116:A	-0.534	8	-0.648, -0.485	9.8	b		150/150	S,A,C			116	S	SER:116:A	-0.351	7	-0.557, -0.257	8.6	b		53/55	S,A		116	S	SER:116:A	-0.321	6	-0.591, -0.177	8.6	b		136/152	A,V,T,S		116	S	SER:116:A	-0.325	7	-0.558, -0.159	8.6	b		97/103	S,A,V
117	H	HIS:117:A	-0.745	9	-0.791, -0.723	9.9	b	s	150/150	H,Q,M			117	H	HIS:117:A	-0.800	9	-0.861, -0.775	9.9	b	s	53/55	H		117	H	HIS:117:A	-0.706	8	-0.882, -0.591	9.8	b		136/152	Q,A,T,H		117	H	HIS:117:A	-0.616	8	-0.764, -0.509	9.8	b		97/103	H,Q,A
118	H	HIS:118:A	-0.802	9	-0.815, -0.799	9.9	b	s	150/150	H			118	H	HIS:118:A	-0.800	9	-0.861, -0.775	9.9	b	s	53/55	H		118	H	HIS:118:A	-0.765	8	-0.941, -0.690	9.8	b		136/152	H,E		118	H	HIS:118:A	-0.715	9	-0.825, -0.642	9.8	b	s	97/103	H,E
119	V	VAL:119:A	-0.686	9	-0.742, -0.648	9.9	b	s	150/150	V,S,C,N			119	V	VAL:119:A	0.200	5	-0.171, 0.535	6.4	b		53/55	C,T,V,S,I,M		119	V	VAL:119:A	-0.061	5	-0.411, 0.148	7.5	b		136/152	S,C,P,T,V,I,M		119	V	VAL:119:A	0.140	5	-0.247, 0.360	6.5	b		97/103	C,T,V,S,I,M
120	R	ARG:120:A	-0.053	5	-0.288, 0.026	7.5	e		150/150	R,T,Q,S,A,L,H,G,N,E			120	R	ARG:120:A	0.130	5	-0.257, 0.336	6.5	e		53/55	V,L,R,K		120	R	ARG:120:A	0.220	5	-0.177, 0.456	6.4	e		137/152	Q,T,S,A,M,V,L,R,K		120	R	ARG:120:A	0.211	5	-0.159, 0.360	6.5	e		97/103	V,L,R,K,T,S
121	H	HIS:121:A	-0.802	9	-0.815, -0.799	9.9	e	f	150/150	H			121	H	HIS:121:A	-0.198	6	-0.458, -0.073	8.5	e		53/55	H,N,Q		121	H	HIS:121:A	-0.285	6	-0.536, -0.081	7.5	e		137/152	H,F,Q,N		121	H	HIS:121:A	-0.187	6	-0.454, -0.058	7.5	e		97/103	H,N,Q,F
122	R	ARG:122:A	-0.635	9	-0.723, -0.577	9.8	e	f	150/150	R,K,C			122	R	ARG:122:A	-0.666	9	-0.793, -0.600	9.8	e	f	53/55	R,K		122	R	ARG:122:A	-0.156	6	-0.476, 0.026	7.5	e		136/152	R,I,K,D,C,H		122	R	ARG:122:A	-0.481	8	-0.678, -0.393	9.7	e	f	97/103	R,K,I
123	L	LEU:123:A	-0.075	5	-0.288, 0.026	7.5	e		150/150	L,T,I,Q,V,M,A,R,S			123	L	LEU:123:A	-0.779	9	-0.857, -0.753	9.9	e	f	53/55	L		123	L	LEU:123:A	0.495	4	0.026, 0.659	5.4	e		137/152	T,S,V,I,M,Y,L		123	L	LEU:123:A	-0.079	5	-0.393, 0.059	7.5	e		97/103	L,T,S,V,I
124	P	PRO:124:A	-0.783	9	-0.814, -0.771	9.9	b	s	150/150	P			124	P	PRO:124:A	-0.765	9	-0.857, -0.729	9.9	b	s	53/55	P		124	P	PRO:124:A	-0.617	8	-0.849, -0.476	9.7	b		137/152	P,K,D		124	P	PRO:124:A	-0.623	8	-0.807, -0.509	9.8	b		97/103	P,K
125	L	LEU:125:A	-0.242	6	-0.429, -0.098	7.6	b		150/150	L,T,C,A,S			125	L	LEU:125:A	-0.302	7	-0.557, -0.171	8.6	b		52/55	V,L,A		125	L	LEU:125:A	0.008	5	-0.341, 0.289	7.5	b		136/152	C,T,S,F,V,L,A		125	L	LEU:125:A	-0.141	6	-0.454, 0.059	7.5	b		96/103	V,L,A,T,S
126	K	LYS:126:A	-0.801	9	-0.814, -0.799	9.9	b	s	150/150	K			126	K	LYS:126:A	-0.805	9	-0.861, -0.793	9.9	b	s	52/55	K		126	K	LYS:126:A	-0.608	8	-0.813, -0.476	9.7	b		136/152	K,Q,N,S,R		126	K	LYS:126:A	-0.731	9	-0.840, -0.678	9.9	b	s	96/103	K,Q
127	G	GLY:127:A	-0.788	9	-0.814, -0.782	9.9	b	s	150/150	G			127	G	GLY:127:A	-0.746	9	-0.857, -0.702	9.9	b	s	52/55	G		127	G	GLY:127:A	-0.729	8	-0.941, -0.591	9.8	b		136/152	G,P		127	G	GLY:127:A	-0.565	8	-0.787, -0.454	9.7	b		96/103	G,P
128	G	GLY:128:A	-0.788	9	-0.814, -0.782	9.9	b	s	150/150	G			128	G	GLY:128:A	-0.746	9	-0.857, -0.702	9.9	b	s	52/55	G		128	G	GLY:128:A	0.087	5	-0.341, 0.289	7.5	b		136/152	G,C,V,D		128	G	GLY:128:A	-0.356	7	-0.642, -0.159	8.6	b		97/103	G,C
129	I	ILE:129:A	-0.753	9	-0.791, -0.742	9.9	b	s	150/150	I,M,V			129	I	ILE:129:A	-0.809	9	-0.861, -0.793	9.9	b	s	52/55	I		129	I	ILE:129:A	-0.819	9	-0.967, -0.734	9.8	b	s	136/152	I,L,V		129	I	ILE:129:A	-0.838	9	-0.882, -0.825	9.9	b	s	97/103	I
130	R	ARG:130:A	-0.799	9	-0.814, -0.799	9.9	e	f	150/150	R			130	R	ARG:130:A	-0.797	9	-0.861, -0.775	9.9	e	f	52/55	R		130	R	ARG:130:A	-0.646	8	-0.849, -0.536	9.7	e	f	136/152	R,C,H		130	R	ARG:130:A	-0.826	9	-0.882, -0.807	9.9	e	f	97/103	R
131	Y	TYR:131:A	0.307	5	0.026, 0.365	5.4	b		150/150	Y,F			131	Y	TYR:131:A	0.963	4	0.336, 1.150	5.3	b		52/55	Y,F		131	Y	TYR:131:A	1.233	3	0.659, 1.809	4.3	b		136/152	Y,F,H,D		131	Y	TYR:131:A	0.868	4	0.360, 1.189	5.3	b		97/103	Y,F
132	A	ALA:132:A	-0.701	9	-0.758, -0.677	9.9	b	s	150/150	A,S			132	A	ALA:132:A	-0.190	6	-0.458, -0.073	8.5	b		52/55	S,A,G		132	A	ALA:132:A	-0.453	7	-0.690, -0.341	8.7	b		136/152	S,N,A,G		132	A	ALA:132:A	-0.332	7	-0.558, -0.159	8.6	b		97/103	S,A,G
133	L	LEU:133:A	1.617	3	0.961, 1.523	4.3	e		150/150	L,M,D,E,T,S,P,N,K,Q			133	L	LEU:133:A	0.256	5	-0.073, 0.535	5.4	e		52/55	M,L,I,S,Q,T		133	L	LEU:133:A	0.554	4	0.148, 0.915	5.4	e		137/152	T,S,L,M,A,I,Q		133	L	LEU:133:A	0.346	5	-0.058, 0.564	5.4	e		98/103	M,L,I,S,Q,T
134	D	ASP:134:A	0.051	5	-0.201, 0.176	6.5	e		150/150	D,E,H,A,S,L			134	D	ASP:134:A	-0.798	9	-0.861, -0.775	9.9	e	f	52/55	D		134	D	ASP:134:A	-0.875	9	-1.012, -0.813	9.9	e	f	136/152	D,X,N		134	D	ASP:134:A	-0.827	9	-0.882, -0.807	9.9	e	f	98/103	D
135	V	VAL:135:A	-0.804	9	-0.815, -0.804	9.9	b	s	150/150	V			135	V	VAL:135:A	-0.680	9	-0.809, -0.600	9.8	b	s	53/55	T,V		135	V	VAL:135:A	-0.583	8	-0.775, -0.476	8.7	b		138/152	V,L,E,G,T		135	V	VAL:135:A	-0.727	9	-0.840, -0.678	9.9	b	s	99/103	T,V
136	N	ASN:136:A	0.568	4	0.176, 0.613	5.4	e		150/150	N,S,C,T,D			136	N	ASN:136:A	0.824	4	0.336, 1.150	5.3	e		53/55	V,T,C,D,S,N,E		136	N	ASN:136:A	0.393	4	0.026, 0.659	5.4	e		138/152	S,C,T,V,D,N,E		136	N	ASN:136:A	0.545	4	0.059, 0.827	5.4	e		99/103	V,T,C,D,S,N,E
137	E	GLU:137:A	0.740	4	0.365, 0.961	4.4	e		150/150	E,R,V,I,A,K,T,L,M,D,S			137	E	GLU:137:A	0.804	4	0.336, 1.150	5.3	e		53/55	R,Q,K,A,E,S,D,G		137	E	GLU:137:A	0.590	4	0.148, 0.915	5.4	e		138/152	V,R,A,Q,K,E,S,D,G		137	E	GLU:137:A	0.606	4	0.196, 0.827	5.4	e		99/103	R,Q,K,A,E,S,D,G
138	S	SER:138:A	-0.628	9	-0.723, -0.577	9.8	e	f	150/150	S,D,N,H			138	S	SER:138:A	0.769	4	0.174, 1.150	5.3	e		53/55	T,D,N,H,S,A		138	S	SER:138:A	0.306	5	-0.081, 0.456	5.4	e		138/152	D,T,N,H,S,A		138	S	SER:138:A	0.502	4	0.059, 0.827	5.4	e		99/103	T,D,N,H,S,A
139	E	GLU:139:A	-0.798	9	-0.814, -0.791	9.9	b	s	150/150	E			139	E	GLU:139:A	-0.701	9	-0.809, -0.638	9.9	b	s	53/55	T,E		139	E	GLU:139:A	-0.911	9	-1.012, -0.849	9.9	b	s	138/152	E,T		139	E	GLU:139:A	-0.745	9	-0.840, -0.678	9.9	b	s	99/103	T,E
140	V	VAL:140:A	-0.777	9	-0.804, -0.758	9.9	b	s	150/150	V,I			140	V	VAL:140:A	-0.682	9	-0.809, -0.600	9.8	b	s	53/55	V,I		140	V	VAL:140:A	-0.794	9	-0.941, -0.690	9.8	b	s	138/152	V,I		140	V	VAL:140:A	-0.729	9	-0.840, -0.678	9.9	b	s	99/103	V,I
141	K	LYS:141:A	-0.576	8	-0.677, -0.534	9.8	e	f	150/150	K,T,M,R,Q			141	K	LYS:141:A	-0.308	7	-0.557, -0.171	8.6	e		53/55	E,K,R,M		141	K	LYS:141:A	-0.501	7	-0.734, -0.341	8.7	e		138/152	K,Q,E,R,M		141	K	LYS:141:A	-0.415	7	-0.602, -0.324	8.7	e		99/103	E,K,R,M
142	A	ALA:142:A	-0.802	9	-0.815, -0.799	9.9	b	s	150/150	A			142	A	ALA:142:A	-0.670	9	-0.809, -0.600	9.8	b	s	53/55	A,G		142	A	ALA:142:A	-0.887	9	-1.012, -0.813	9.9	b	s	138/152	A,G		142	A	ALA:142:A	-0.719	9	-0.840, -0.642	9.8	b	s	99/103	A,G
143	L	LEU:143:A	-0.798	9	-0.814, -0.791	9.9	b	s	150/150	L			143	L	LEU:143:A	-0.603	8	-0.775, -0.510	9.8	b		53/55	I,L		143	L	LEU:143:A	-0.818	9	-0.991, -0.734	9.8	b	s	138/152	L,I		143	L	LEU:143:A	-0.659	9	-0.807, -0.558	9.8	b	s	99/103	I,L
144	A	ALA:144:A	-0.383	7	-0.534, -0.288	8.7	b		150/150	A,S			144	A	ALA:144:A	-0.572	8	-0.729, -0.458	9.8	b		53/55	S,A,G		144	A	ALA:144:A	-0.624	8	-0.813, -0.536	9.7	b		138/152	A,S,V,G		144	A	ALA:144:A	-0.644	8	-0.787, -0.558	9.8	b		99/103	S,A,G
145	A	ALA:145:A	-0.645	9	-0.723, -0.615	9.8	b	s	150/150	A,S,Q			145	A	ALA:145:A	0.194	5	-0.171, 0.336	6.5	b		53/55	V,S,A,Y,T		145	A	ALA:145:A	-0.032	5	-0.341, 0.148	7.5	b		138/152	S,A,T,V,Y		145	A	ALA:145:A	-0.008	5	-0.324, 0.196	7.5	b		99/103	V,S,A,Y,T
146	I	ILE:146:A	-0.753	9	-0.799, -0.723	9.9	b	s	150/150	I,L			146	I	ILE:146:A	-0.367	7	-0.600, -0.257	8.6	b		53/55	F,L,I		146	I	ILE:146:A	-0.602	8	-0.813, -0.476	9.7	b		138/152	L,F,I		146	I	ILE:146:A	-0.438	7	-0.642, -0.324	8.7	b		99/103	F,L,I
147	M	MET:147:A	-0.806	9	-0.815, -0.804	9.9	b	s	150/150	M			147	M	MET:147:A	-0.713	9	-0.823, -0.672	9.9	b	s	54/55	I,M		147	M	MET:147:A	-0.839	9	-0.967, -0.775	9.8	b	s	144/152	M,T,I		147	M	MET:147:A	-0.755	9	-0.840, -0.710	9.9	b	s	101/103	I,M
148	T	THR:148:A	-0.774	9	-0.804, -0.758	9.9	b	s	150/150	T,S			148	T	THR:148:A	-0.453	7	-0.638, -0.332	9.7	b		53/55	T,A,S		148	T	THR:148:A	-0.615	8	-0.813, -0.476	9.7	b		143/152	T,A,S		148	T	THR:148:A	-0.533	8	-0.710, -0.454	9.7	b		100/103	T,A,S
149	F	PHE:149:A	-0.156	6	-0.364, -0.098	7.6	b		150/150	F,Y,W,C			149	F	PHE:149:A	-0.598	8	-0.775, -0.510	9.8	b		53/55	F,Y		149	F	PHE:149:A	-0.518	7	-0.775, -0.341	8.7	b		143/152	Y,F,C		149	F	PHE:149:A	-0.654	8	-0.807, -0.558	9.8	b		100/103	F,Y
150	K	LYS:150:A	-0.801	9	-0.814, -0.799	9.9	b	s	150/150	K			150	K	LYS:150:A	-0.805	9	-0.861, -0.793	9.9	b	s	53/55	K		150	K	LYS:150:A	-0.993	9	-1.059, -0.967	9.9	b	s	143/152	K		150	K	LYS:150:A	-0.834	9	-0.882, -0.825	9.9	b	s	100/103	K
151	C	CYS:151:A	-0.799	9	-0.814, -0.791	9.9	b	s	150/150	C			151	C	CYS:151:A	-0.523	8	-0.753, -0.398	9.7	b		53/55	C,T		151	C	CYS:151:A	-0.349	7	-0.690, -0.177	8.6	b		143/152	C,Y,S,T		151	C	CYS:151:A	-0.582	8	-0.787, -0.454	9.7	b		100/103	C,T
152	A	ALA:152:A	-0.669	9	-0.742, -0.615	9.8	b	s	150/150	A,S			152	A	ALA:152:A	-0.563	8	-0.729, -0.458	9.8	b		53/55	S,A		152	A	ALA:152:A	-0.700	8	-0.882, -0.591	9.8	b		143/152	A,V,S		152	A	ALA:152:A	-0.627	8	-0.764, -0.558	9.8	b		100/103	S,A
153	C	CYS:153:A	-0.375	7	-0.534, -0.288	8.7	b		150/150	C,V,I,A,T			153	C	CYS:153:A	-0.261	6	-0.600, -0.073	8.5	b		53/55	C,S,R		153	C	CYS:153:A	-0.276	6	-0.591, -0.081	8.5	b		143/152	V,C,M,S,R		153	C	CYS:153:A	-0.357	7	-0.642, -0.159	8.6	b		100/103	C,S,R
154	V	VAL:154:A	-0.749	9	-0.791, -0.723	9.9	b	s	150/150	V,T,L			154	V	VAL:154:A	-0.679	9	-0.809, -0.600	9.8	b	s	53/55	V,G		154	V	VAL:154:A	-0.890	9	-1.012, -0.813	9.9	b	s	143/152	V,G		154	V	VAL:154:A	-0.726	9	-0.840, -0.678	9.9	b	s	100/103	V,G
155	N	ASN:155:A	-0.552	8	-0.648, -0.485	9.8	e	f	150/150	N,D			155	N	ASN:155:A	-0.522	8	-0.702, -0.398	9.7	e	f	53/55	H,N,S		155	N	ASN:155:A	-0.649	8	-0.813, -0.536	9.7	e	f	143/152	D,H,N,S		155	N	ASN:155:A	-0.492	8	-0.678, -0.393	9.7	e	f	100/103	H,N,S,D
156	V	VAL:156:A	-0.804	9	-0.815, -0.804	9.9	b	s	150/150	V			156	V	VAL:156:A	0.115	5	-0.257, 0.336	6.5	b		53/55	V,L,I,A		156	V	VAL:156:A	-0.192	6	-0.476, 0.026	7.5	b		143/152	V,M,L,I,A		156	V	VAL:156:A	-0.078	5	-0.393, 0.059	7.5	b		100/103	V,L,I,A
157	P	PRO:157:A	-0.783	9	-0.814, -0.771	9.9	e	f	150/150	P			157	P	PRO:157:A	-0.764	9	-0.857, -0.729	9.9	e	f	53/55	P		157	P	PRO:157:A	-0.785	8	-0.967, -0.690	9.8	e	f	145/152	P,L		157	P	PRO:157:A	-0.796	9	-0.882, -0.764	9.9	e	f	100/103	P
158	Y	TYR:158:A	-0.754	9	-0.799, -0.723	9.9	b	s	150/150	Y,F			158	Y	TYR:158:A	-0.237	6	-0.510, -0.073	8.5	b		53/55	F,Y		158	Y	TYR:158:A	-0.249	6	-0.536, -0.081	7.5	b		145/152	F,L,V,Y		158	Y	TYR:158:A	-0.345	7	-0.602, -0.159	8.6	b		100/103	F,Y
159	G	GLY:159:A	-0.788	9	-0.814, -0.782	9.9	b	s	150/150	G			159	G	GLY:159:A	-0.746	9	-0.857, -0.702	9.9	b	s	53/55	G		159	G	GLY:159:A	-0.733	8	-0.941, -0.591	9.8	b		145/152	G,W		159	G	GLY:159:A	-0.780	9	-0.878, -0.739	9.9	b	s	100/103	G
160	G	GLY:160:A	-0.788	9	-0.814, -0.782	9.9	b	s	150/150	G			160	G	GLY:160:A	-0.746	9	-0.857, -0.702	9.9	b	s	53/55	G		160	G	GLY:160:A	-0.324	6	-0.642, -0.081	8.5	b		145/152	G,H,A,C		160	G	GLY:160:A	-0.780	9	-0.878, -0.739	9.9	b	s	100/103	G
161	S	SER:161:A	-0.275	7	-0.429, -0.201	7.6	b		150/150	S,A,G			161	S	SER:161:A	-0.597	8	-0.753, -0.510	9.8	b		53/55	A,S		161	S	SER:161:A	-0.728	8	-0.882, -0.642	9.8	b		145/152	A,R,S		161	S	SER:161:A	-0.648	8	-0.787, -0.558	9.8	b		100/103	A,S
162	K	LYS:162:A	-0.801	9	-0.814, -0.799	9.9	b	s	150/150	K			162	K	LYS:162:A	-0.805	9	-0.861, -0.793	9.9	b	s	53/55	K		162	K	LYS:162:A	-0.995	9	-1.059, -0.967	9.9	b	s	145/152	K		162	K	LYS:162:A	-0.834	9	-0.882, -0.825	9.9	b	s	100/103	K
163	G	GLY:163:A	-0.659	9	-0.742, -0.615	9.8	b	s	150/150	G,A			163	G	GLY:163:A	-0.746	9	-0.857, -0.702	9.9	b	s	53/55	G		163	G	GLY:163:A	-0.529	7	-0.775, -0.411	8.7	b		145/152	A,G,R		163	G	GLY:163:A	-0.611	8	-0.787, -0.509	9.8	b		100/103	G,A
164	G	GLY:164:A	-0.719	9	-0.791, -0.677	9.9	b	s	150/150	G,A			164	G	GLY:164:A	-0.746	9	-0.857, -0.702	9.9	b	s	53/55	G		164	G	GLY:164:A	-0.140	6	-0.536, 0.148	7.5	b		145/152	G,A,K,S,D		164	G	GLY:164:A	-0.780	9	-0.878, -0.739	9.9	b	s	100/103	G
165	I	ILE:165:A	0.258	5	0.026, 0.365	5.4	b		150/150	I,V,L			165	I	ILE:165:A	0.177	5	-0.171, 0.336	6.5	b		53/55	I,V		165	I	ILE:165:A	0.324	5	-0.081, 0.659	5.4	b		145/152	V,L,I,F		165	I	ILE:165:A	0.350	5	-0.058, 0.564	5.4	b		100/103	I,V,L
166	C	CYS:166:A	-0.093	6	-0.288, 0.026	7.5	e		150/150	C,K,R,Q,I,A			166	C	CYS:166:A	-0.199	6	-0.510, -0.073	8.5	e		53/55	K,I,R,C		166	C	CYS:166:A	-0.450	7	-0.690, -0.263	8.6	e		145/152	K,T,I,R,C		166	C	CYS:166:A	-0.335	7	-0.558, -0.159	8.6	e		100/103	K,I,R,C
167	I	ILE:167:A	-0.700	9	-0.758, -0.677	9.9	b	s	150/150	I,L,V			167	I	ILE:167:A	-0.574	8	-0.729, -0.458	9.8	b		53/55	L,I,M		167	I	ILE:167:A	-0.645	8	-0.813, -0.536	9.7	b		145/152	I,V,L,M		167	I	ILE:167:A	-0.642	8	-0.787, -0.558	9.8	b		100/103	L,I,M
168	D	ASP:168:A	-0.054	5	-0.288, 0.026	7.5	e		150/150	D,N			168	D	ASP:168:A	-0.665	9	-0.793, -0.600	9.8	e	f	53/55	N,D		168	D	ASP:168:A	-0.306	6	-0.536, -0.177	7.6	e		145/152	N,D,A,S,Y		168	D	ASP:168:A	-0.603	8	-0.764, -0.509	9.8	e	f	100/103	N,D
169	P	PRO:169:A	-0.139	6	-0.364, 0.026	7.5	e		150/150	P,T,H,V			169	P	PRO:169:A	-0.562	8	-0.775, -0.458	9.8	e	f	53/55	P,V		169	P	PRO:169:A	-0.785	8	-0.967, -0.690	9.8	e	f	145/152	P,V		169	P	PRO:169:A	-0.621	8	-0.807, -0.509	9.8	e	f	100/103	P,V
170	K	LYS:170:A	0.613	4	0.176, 0.961	5.4	e		150/150	K,R,S,F,A,Q,H,T			170	K	LYS:170:A	-0.150	6	-0.458, 0.041	8.5	e		53/55	K,S,A,G,R		170	K	LYS:170:A	-0.168	6	-0.476, 0.026	7.5	e		144/152	K,R,S,A,G		170	K	LYS:170:A	-0.176	6	-0.454, -0.058	7.5	e		100/103	K,S,A,G,R
171	K	LYS:171:A	3.130	1	1.523, 3.130	3.1	e		150/150	K,E,N,A,D,Q,L,M,H,T,V			171	K	LYS:171:A	1.244	3	0.535, 1.720	4.3	e		53/55	T,S,R,K,M,A,Q,L,N,E,I		171	K	LYS:171:A	1.924	2	0.915, 1.809	4.3	e		144/152	N,S,H,Q,K,E,A,T,R,M,L,I		171	K	LYS:171:A	1.653	3	0.827, 1.768	4.3	e		100/103	T,S,R,K,M,A,Q,L,N,E,I
172	Y	TYR:172:A	-0.381	7	-0.534, -0.288	8.7	b		150/150	Y,F,W			172	Y	TYR:172:A	-0.778	9	-0.857, -0.753	9.9	b	s	53/55	Y		172	Y	TYR:172:A	-0.960	9	-1.059, -0.912	9.9	b	s	144/152	Y		172	Y	TYR:172:A	-0.809	9	-0.882, -0.787	9.9	b	s	100/103	Y
173	T	THR:173:A	-0.398	7	-0.534, -0.364	8.7	e		150/150	T,S			173	T	THR:173:A	0.508	4	0.041, 0.793	5.4	e		53/55	S,T,A,Q,E		173	T	THR:173:A	0.098	5	-0.263, 0.289	6.5	e		144/152	T,S,A,Q,E		173	T	THR:173:A	0.242	5	-0.159, 0.360	6.5	e		100/103	S,T,A,Q,E
174	V	VAL:174:A	0.364	4	0.026, 0.613	5.4	e		150/150	V,E,D,I,A,T,L			174	V	VAL:174:A	0.847	4	0.336, 1.150	5.3	e		53/55	D,E,A,T,V,S,F,L		174	V	VAL:174:A	0.579	4	0.148, 0.915	5.4	e		144/152	D,E,N,A,T,V,S,F,L		174	V	VAL:174:A	0.525	4	0.059, 0.827	5.4	e		100/103	D,E,A,T,V,S,F,L
175	D	ASP:175:A	1.297	3	0.613, 1.523	4.3	e		150/150	D,H,N,E,T,A,R,F,G,L,S,Q,K,M,Y			175	D	ASP:175:A	0.922	4	0.336, 1.150	5.3	e		53/55	K,H,Q,A,D,S,M,R,G		175	D	ASP:175:A	0.448	4	0.026, 0.659	5.4	e		144/152	N,H,K,Q,A,D,S,M,R,G		175	D	ASP:175:A	0.809	4	0.360, 1.189	5.3	e		100/103	K,H,Q,A,D,S,M,R,G
176	E	GLU:176:A	-0.798	9	-0.814, -0.791	9.9	b	s	150/150	E			176	E	GLU:176:A	-0.698	9	-0.809, -0.638	9.9	b	s	53/55	E,D		176	E	GLU:176:A	-0.911	9	-1.012, -0.849	9.9	b	s	144/152	E,D		176	E	GLU:176:A	-0.743	9	-0.840, -0.678	9.9	b	s	100/103	E,D
177	L	LEU:177:A	-0.615	8	-0.702, -0.577	9.8	b		150/150	L,M,K,I			177	L	LEU:177:A	-0.778	9	-0.857, -0.753	9.9	b	s	53/55	L		177	L	LEU:177:A	-0.960	9	-1.059, -0.912	9.9	b	s	144/152	L		177	L	LEU:177:A	-0.809	9	-0.882, -0.787	9.9	b	s	100/103	L
178	Q	GLN:178:A	-0.756	9	-0.799, -0.742	9.9	e	f	150/150	Q,E			178	Q	GLN:178:A	-0.715	9	-0.823, -0.672	9.9	e	f	53/55	Q,K		178	Q	GLN:178:A	-0.754	8	-0.912, -0.690	9.8	e	f	144/152	E,D,Q,K		178	Q	GLN:178:A	-0.668	9	-0.787, -0.602	9.8	e	f	100/103	Q,K,E
179	T	THR:179:A	-0.193	6	-0.364, -0.098	7.6	e		150/150	T,K,R,Q,A,M			179	T	THR:179:A	-0.344	7	-0.557, -0.171	8.6	e		53/55	S,T,A,I		179	T	THR:179:A	-0.418	7	-0.642, -0.263	8.6	e		144/152	K,N,S,T,A,I		179	T	THR:179:A	-0.320	7	-0.558, -0.159	8.6	e		100/103	S,T,A,I,K
180	I	ILE:180:A	-0.753	9	-0.791, -0.742	9.9	b	s	150/150	I,M			180	I	ILE:180:A	-0.701	9	-0.809, -0.638	9.9	b	s	53/55	I,V		180	I	ILE:180:A	-0.912	9	-1.012, -0.849	9.9	b	s	144/152	I,V		180	I	ILE:180:A	-0.745	9	-0.840, -0.678	9.9	b	s	100/103	I,V
181	T	THR:181:A	-0.804	9	-0.815, -0.799	9.9	b	s	150/150	T			181	T	THR:181:A	-0.807	9	-0.861, -0.793	9.9	b	s	53/55	T		181	T	THR:181:A	-0.814	9	-0.941, -0.734	9.8	b	s	145/152	T,A,I		181	T	THR:181:A	-0.835	9	-0.882, -0.825	9.9	b	s	100/103	T
182	R	ARG:182:A	-0.799	9	-0.814, -0.799	9.9	e	f	150/150	R			182	R	ARG:182:A	-0.797	9	-0.861, -0.775	9.9	e	f	53/55	R		182	R	ARG:182:A	-0.986	9	-1.059, -0.967	9.9	e	f	145/152	R		182	R	ARG:182:A	-0.827	9	-0.882, -0.807	9.9	e	f	100/103	R
183	R	ARG:183:A	-0.679	9	-0.758, -0.648	9.9	e	f	150/150	R,K,N,S			183	R	ARG:183:A	-0.797	9	-0.861, -0.775	9.9	e	f	53/55	R		183	R	ARG:183:A	-0.879	9	-1.012, -0.813	9.9	e	f	145/152	R,M		183	R	ARG:183:A	-0.827	9	-0.882, -0.807	9.9	e	f	100/103	R
184	Y	TYR:184:A	-0.370	7	-0.534, -0.288	8.7	b		150/150	Y,F,L,I,V			184	Y	TYR:184:A	-0.603	8	-0.775, -0.510	9.8	b		53/55	Y,F		184	Y	TYR:184:A	-0.513	7	-0.775, -0.341	8.7	b		145/152	F,R,Y		184	Y	TYR:184:A	-0.504	8	-0.710, -0.393	9.7	b		100/103	Y,F
185	T	THR:185:A	-0.059	5	-0.288, 0.026	7.5	b		150/150	T,A,C,S			185	T	THR:185:A	-0.567	8	-0.729, -0.458	9.8	b		53/55	T,A,C		185	T	THR:185:A	-0.617	8	-0.813, -0.476	9.7	b		145/152	T,A,E,C		185	T	THR:185:A	-0.521	8	-0.710, -0.393	9.7	b		100/103	T,A,C
186	M	MET:186:A	0.075	5	-0.201, 0.176	6.5	e		150/150	M,L,I,V,A			186	M	MET:186:A	-0.479	8	-0.672, -0.398	9.7	e	f	53/55	A,V,M,I		186	M	MET:186:A	0.049	5	-0.263, 0.289	6.5	e		144/152	M,L,V,T,I,A		186	M	MET:186:A	-0.430	7	-0.642, -0.324	8.7	e		100/103	A,V,M,I,L
187	E	GLU:187:A	-0.501	8	-0.615, -0.429	8.7	b		150/150	E,N,D,Q,M,H,C			187	E	GLU:187:A	-0.810	9	-0.861, -0.793	9.9	b	s	53/55	E		187	E	GLU:187:A	-0.906	9	-1.012, -0.849	9.9	b	s	144/152	E,R		187	E	GLU:187:A	-0.838	9	-0.882, -0.825	9.9	b	s	100/103	E
188	L	LEU:188:A	-0.706	9	-0.771, -0.677	9.9	b	s	150/150	L,I,F			188	L	LEU:188:A	-0.778	9	-0.857, -0.753	9.9	b	s	53/55	L		188	L	LEU:188:A	-0.818	9	-0.991, -0.734	9.8	b	s	144/152	L,R		188	L	LEU:188:A	-0.809	9	-0.882, -0.787	9.9	b	s	100/103	L
189	L	LEU:189:A	-0.196	6	-0.364, -0.098	7.6	b		150/150	L,A,S,V,C,G,T			189	L	LEU:189:A	-0.611	8	-0.775, -0.510	9.8	b		53/55	A,L		189	L	LEU:189:A	-0.518	7	-0.734, -0.341	8.7	b		145/152	A,S,P,Q,L		189	L	LEU:189:A	-0.542	8	-0.739, -0.454	9.7	b		100/103	A,L,S
190	K	LYS:190:A	-0.801	9	-0.814, -0.799	9.9	e	f	150/150	K			190	K	LYS:190:A	-0.268	6	-0.510, -0.073	8.5	e		53/55	K,R,C		190	K	LYS:190:A	-0.487	7	-0.690, -0.341	8.7	e		145/152	K,D,R,C		190	K	LYS:190:A	-0.385	7	-0.602, -0.247	8.6	e		100/103	K,R,C
191	R	ARG:191:A	-0.764	9	-0.799, -0.742	9.9	e	f	150/150	R,K			191	R	ARG:191:A	-0.403	7	-0.638, -0.257	9.6	e		53/55	K,R		191	R	ARG:191:A	-0.587	8	-0.775, -0.476	8.7	e	f	145/152	K,Q,X,R		191	R	ARG:191:A	-0.493	8	-0.678, -0.393	9.7	e	f	100/103	K,R
192	N	ASN:192:A	-0.650	9	-0.742, -0.577	9.8	e	f	150/150	N,G			192	N	ASN:192:A	-0.724	9	-0.823, -0.672	9.9	e	f	53/55	N,H		192	N	ASN:192:A	-0.697	8	-0.882, -0.591	9.8	e	f	145/152	G,D,N,H		192	N	ASN:192:A	-0.659	9	-0.787, -0.602	9.8	e	f	100/103	N,H,G
193	M	MET:193:A	-0.753	9	-0.799, -0.723	9.9	b	s	150/150	M,F			193	M	MET:193:A	-0.692	9	-0.809, -0.638	9.9	b	s	53/55	F,M		193	M	MET:193:A	-0.665	8	-0.849, -0.536	9.7	b		145/152	F,L,C,M		193	M	MET:193:A	-0.727	9	-0.840, -0.678	9.9	b	s	100/103	F,M
194	I	ILE:194:A	-0.574	8	-0.677, -0.534	9.8	b		150/150	I,M,L,V			194	I	ILE:194:A	-0.697	9	-0.809, -0.638	9.9	b	s	53/55	I,L		194	I	ILE:194:A	-0.912	9	-1.012, -0.849	9.9	b	s	145/152	I,L		194	I	ILE:194:A	-0.743	9	-0.840, -0.678	9.9	b	s	100/103	I,L
195	G	GLY:195:A	-0.788	9	-0.814, -0.782	9.9	b	s	150/150	G			195	G	GLY:195:A	-0.746	9	-0.857, -0.702	9.9	b	s	53/55	G		195	G	GLY:195:A	-0.922	9	-1.047, -0.882	9.9	b	s	145/152	G		195	G	GLY:195:A	-0.780	9	-0.878, -0.739	9.9	b	s	100/103	G
196	P	PRO:196:A	-0.701	9	-0.782, -0.648	9.9	b	s	150/150	P,A			196	P	PRO:196:A	-0.764	9	-0.857, -0.729	9.9	b	s	53/55	P		196	P	PRO:196:A	-0.780	8	-0.967, -0.690	9.8	b		145/152	P,H		196	P	PRO:196:A	-0.796	9	-0.882, -0.764	9.9	b	s	100/103	P
197	G	GLY:197:A	-0.595	8	-0.702, -0.534	9.8	e	f	150/150	G,S			197	G	GLY:197:A	-0.508	8	-0.753, -0.398	9.7	e	f	53/55	G,A		197	G	GLY:197:A	-0.345	7	-0.690, -0.177	8.6	e		145/152	G,H,R,A		197	G	GLY:197:A	-0.572	8	-0.787, -0.454	9.7	e	f	100/103	G,A
198	I	ILE:198:A	-0.126	6	-0.288, 0.026	7.5	e		150/150	I,V,L			198	I	ILE:198:A	-0.588	8	-0.753, -0.510	9.8	e	f	53/55	I,V		198	I	ILE:198:A	-0.553	7	-0.734, -0.411	8.7	e		145/152	I,V,N		198	I	ILE:198:A	-0.548	8	-0.710, -0.454	9.7	e	f	100/103	I,V
199	D	ASP:199:A	-0.799	9	-0.814, -0.791	9.9	b	s	150/150	D			199	D	ASP:199:A	-0.798	9	-0.861, -0.775	9.9	b	s	53/55	D		199	D	ASP:199:A	-0.985	9	-1.059, -0.967	9.9	b	s	145/152	D		199	D	ASP:199:A	-0.827	9	-0.882, -0.807	9.9	b	s	100/103	D
200	V	VAL:200:A	-0.804	9	-0.815, -0.804	9.9	b	s	150/150	V			200	V	VAL:200:A	-0.803	9	-0.861, -0.793	9.9	b	s	53/55	V		200	V	VAL:200:A	-0.991	9	-1.059, -0.967	9.9	b	s	145/152	V		200	V	VAL:200:A	-0.832	9	-0.882, -0.807	9.9	b	s	100/103	V
201	P	PRO:201:A	-0.783	9	-0.814, -0.771	9.9	b	s	150/150	P			201	P	PRO:201:A	-0.764	9	-0.857, -0.729	9.9	b	s	53/55	P		201	P	PRO:201:A	-0.616	8	-0.849, -0.476	9.7	b		145/152	P,L,A		201	P	PRO:201:A	-0.796	9	-0.882, -0.764	9.9	b	s	100/103	P
202	A	ALA:202:A	-0.769	9	-0.804, -0.758	9.9	b	s	150/150	A,S			202	A	ALA:202:A	-0.805	9	-0.861, -0.793	9.9	b	s	53/55	A		202	A	ALA:202:A	-0.898	9	-1.012, -0.849	9.9	b	s	143/152	A,S,X		202	A	ALA:202:A	-0.833	9	-0.882, -0.825	9.9	b	s	100/103	A
203	P	PRO:203:A	-0.783	9	-0.814, -0.771	9.9	e	f	150/150	P			203	P	PRO:203:A	-0.764	9	-0.857, -0.729	9.9	e	f	53/55	P		203	P	PRO:203:A	-0.781	8	-0.967, -0.690	9.8	e	f	145/152	P,S		203	P	PRO:203:A	-0.796	9	-0.882, -0.764	9.9	e	f	100/103	P
204	D	ASP:204:A	-0.799	9	-0.814, -0.791	9.9	e	f	150/150	D			204	D	ASP:204:A	-0.798	9	-0.861, -0.775	9.9	e	f	53/55	D		204	D	ASP:204:A	-0.985	9	-1.059, -0.967	9.9	e	f	145/152	D		204	D	ASP:204:A	-0.827	9	-0.882, -0.807	9.9	e	f	100/103	D
205	V	VAL:205:A	-0.756	9	-0.791, -0.742	9.9	e	f	150/150	V,M			205	V	VAL:205:A	-0.156	6	-0.458, 0.041	8.5	e		53/55	M,V		205	V	VAL:205:A	-0.538	7	-0.734, -0.411	8.7	e		145/152	M,V		205	V	VAL:205:A	-0.314	7	-0.558, -0.159	8.6	e		100/103	M,V
206	N	ASN:206:A	-0.458	8	-0.615, -0.364	8.7	e	f	150/150	N,G,S			206	N	ASN:206:A	-0.701	9	-0.809, -0.638	9.9	e	f	53/55	G,N		206	N	ASN:206:A	-0.610	8	-0.813, -0.476	9.7	e	f	146/152	S,G,E,N		206	N	ASN:206:A	-0.728	9	-0.840, -0.678	9.9	e	f	100/103	G,N
207	T	THR:207:A	-0.774	9	-0.804, -0.758	9.9	b	s	150/150	T,S			207	T	THR:207:A	-0.807	9	-0.861, -0.793	9.9	b	s	53/55	T		207	T	THR:207:A	-0.816	9	-0.941, -0.734	9.8	b	s	146/152	T,A,K		207	T	THR:207:A	-0.835	9	-0.882, -0.825	9.9	b	s	100/103	T
208	G	GLY:208:A	-0.447	7	-0.615, -0.364	8.7	e		150/150	G,S			208	G	GLY:208:A	0.023	5	-0.332, 0.174	7.5	e		53/55	S,T,G		208	G	GLY:208:A	0.052	5	-0.341, 0.289	7.5	e		146/152	G,S,T		208	G	GLY:208:A	0.133	5	-0.247, 0.360	6.5	e		100/103	S,T,G
209	P	PRO:209:A	-0.663	9	-0.742, -0.615	9.8	e	f	150/150	P,E,V			209	P	PRO:209:A	0.503	4	0.041, 0.793	5.4	e		53/55	D,S,E,P,G,Q		209	P	PRO:209:A	0.006	5	-0.341, 0.148	7.5	e		145/152	E,K,D,S,P,G,Q		209	P	PRO:209:A	0.226	5	-0.159, 0.360	6.5	e		100/103	D,S,E,P,G,Q
210	R	ARG:210:A	-0.717	9	-0.771, -0.677	9.9	e	f	150/150	R,K,T			210	R	ARG:210:A	-0.797	9	-0.861, -0.775	9.9	e	f	53/55	R		210	R	ARG:210:A	-0.655	8	-0.849, -0.536	9.7	e	f	145/152	R,W,G,H		210	R	ARG:210:A	-0.827	9	-0.882, -0.807	9.9	e	f	100/103	R
211	E	GLU:211:A	-0.669	9	-0.742, -0.615	9.8	b	s	150/150	E,Q,V			211	E	GLU:211:A	-0.810	9	-0.861, -0.793	9.9	b	s	53/55	E		211	E	GLU:211:A	-0.914	9	-1.012, -0.849	9.9	b	s	145/152	E,Q		211	E	GLU:211:A	-0.838	9	-0.882, -0.825	9.9	b	s	100/103	E
212	M	MET:212:A	-0.806	9	-0.815, -0.804	9.9	b	s	150/150	M			212	M	MET:212:A	-0.813	9	-0.861, -0.793	9.9	b	s	53/55	M		212	M	MET:212:A	-0.923	9	-1.012, -0.882	9.9	b	s	145/152	M,V		212	M	MET:212:A	-0.841	9	-0.882, -0.825	9.9	b	s	100/103	M
213	S	SER:213:A	-0.353	7	-0.485, -0.288	8.7	e		150/150	S,A,G			213	S	SER:213:A	0.042	5	-0.257, 0.174	6.5	e		53/55	S,A,N		213	S	SER:213:A	-0.204	6	-0.476, -0.081	7.5	e		146/152	S,A,N		213	S	SER:213:A	-0.131	6	-0.393, 0.059	7.5	e		100/103	S,A,N
214	W	TRP:214:A	-0.785	9	-0.814, -0.782	9.9	b	s	150/150	W			214	W	TRP:214:A	-0.740	9	-0.857, -0.702	9.9	b	s	53/55	W		214	W	TRP:214:A	-0.916	9	-1.047, -0.849	9.9	b	s	145/152	W,X		214	W	TRP:214:A	-0.774	9	-0.878, -0.739	9.9	b	s	100/103	W
215	I	ILE:215:A	-0.591	8	-0.677, -0.534	9.8	b		150/150	I,L,V,M			215	I	ILE:215:A	0.339	5	-0.073, 0.535	5.4	b		54/55	L,M,I,V		215	I	ILE:215:A	-0.151	6	-0.411, 0.026	7.5	b		146/152	I,L,M,V		215	I	ILE:215:A	0.107	5	-0.247, 0.360	6.5	b		101/103	L,M,I,V
216	V	VAL:216:A	-0.567	8	-0.677, -0.534	9.8	b		150/150	V,A,S,C			216	V	VAL:216:A	0.207	5	-0.171, 0.535	6.4	b		54/55	C,A,V,L,E,S		216	V	VAL:216:A	-0.146	6	-0.411, 0.026	7.5	b		146/152	A,T,C,V,L,E,S		216	V	VAL:216:A	0.005	5	-0.324, 0.196	7.5	b		101/103	C,A,V,L,E,S
217	D	ASP:217:A	-0.757	9	-0.799, -0.742	9.9	e	f	150/150	D,S			217	D	ASP:217:A	-0.799	9	-0.861, -0.775	9.9	e	f	54/55	D		217	D	ASP:217:A	-0.986	9	-1.059, -0.967	9.9	e	f	146/152	D		217	D	ASP:217:A	-0.828	9	-0.882, -0.807	9.9	e	f	101/103	D
218	Q	GLN:218:A	-0.773	9	-0.804, -0.758	9.9	b	s	150/150	Q,T			218	Q	GLN:218:A	-0.815	9	-0.861, -0.793	9.9	b	s	53/55	Q		218	Q	GLN:218:A	-0.746	8	-0.912, -0.642	9.8	b		145/152	T,I,Q		218	Q	GLN:218:A	-0.751	9	-0.840, -0.710	9.9	b	s	100/103	Q,T
219	Y	TYR:219:A	-0.200	6	-0.429, -0.098	7.6	b		150/150	Y,F			219	Y	TYR:219:A	-0.778	9	-0.857, -0.753	9.9	b	s	53/55	Y		219	Y	TYR:219:A	-0.819	9	-0.991, -0.734	9.8	b	s	145/152	Y,C		219	Y	TYR:219:A	-0.809	9	-0.882, -0.787	9.9	b	s	100/103	Y
220	Q	GLN:220:A	0.079	5	-0.201, 0.176	6.5	e		150/150	Q,A,S,E,G			220	Q	GLN:220:A	1.332	3	0.535, 1.720	4.3	e		53/55	S,G,I,V,Q,T,M,L		220	Q	GLN:220:A	0.616	4	0.148, 0.915	5.4	e		145/152	A,S,G,I,V,Q,T,M,L		220	Q	GLN:220:A	0.994	4	0.360, 1.189	5.3	e		100/103	S,G,I,V,Q,T,M,L,A
221	K	LYS:221:A	0.107	5	-0.098, 0.176	6.5	e		150/150	K,S,N,T,Q,M			221	K	LYS:221:A	-0.805	9	-0.861, -0.793	9.9	e	f	53/55	K		221	K	LYS:221:A	-0.634	8	-0.813, -0.536	9.7	e	f	146/152	S,K,G,R,N		221	K	LYS:221:A	-0.834	9	-0.882, -0.825	9.9	e	f	100/103	K
222	T	THR:222:A	-0.745	9	-0.791, -0.723	9.9	e	f	150/150	T,S			222	T	THR:222:A	-0.807	9	-0.861, -0.793	9.9	e	f	53/55	T		222	T	THR:222:A	-0.816	9	-0.941, -0.734	9.8	e	f	146/152	T,V,I		222	T	THR:222:A	-0.835	9	-0.882, -0.825	9.9	e	f	100/103	T
223	F	PHE:223:A	0.134	5	-0.098, 0.176	6.5	e		150/150	F,I,V,M,L,T,Y,S,H			223	F	PHE:223:A	-0.237	6	-0.510, -0.073	8.5	e		54/55	F,I,Y		223	F	PHE:223:A	0.102	5	-0.263, 0.289	6.5	e		147/152	I,M,F,K,Y		223	F	PHE:223:A	-0.228	6	-0.509, -0.058	8.5	e		101/103	F,I,Y
224	G	GLY:224:A	-0.721	9	-0.791, -0.677	9.9	b	s	150/150	G,A			224	G	GLY:224:A	-0.748	9	-0.857, -0.702	9.9	b	s	54/55	G		224	G	GLY:224:A	-0.547	7	-0.813, -0.411	9.7	b		147/152	G,R		224	G	GLY:224:A	-0.781	9	-0.878, -0.739	9.9	b	s	101/103	G
225	Y	TYR:225:A	0.127	5	-0.098, 0.176	6.5	e		150/150	Y,H,F,W,S			225	Y	TYR:225:A	-0.012	5	-0.332, 0.174	7.5	e		54/55	H,Y,F		225	Y	TYR:225:A	-0.169	6	-0.476, 0.026	7.5	e		147/152	H,K,Y,F		225	Y	TYR:225:A	-0.183	6	-0.454, -0.058	7.5	e		101/103	H,Y,F
226	K	LYS:226:A	2.399	2	0.961, 3.130	4.1	e		150/150	K,L,Y,T,R,Q,H,N,D,G,M,S,E,F,A			226	K	LYS:226:A	-0.075	5	-0.398, 0.174	7.5	e		54/55	K,R,N,Q,D		226	K	LYS:226:A	0.152	5	-0.177, 0.456	6.4	e		147/152	Y,L,N,C,K,R,Q,D		226	K	LYS:226:A	0.082	5	-0.247, 0.360	6.5	e		101/103	K,R,N,Q,D,L
227	D	ASP:227:A	-0.328	7	-0.485, -0.201	8.6	e		150/150	D,N,E,H			227	D	ASP:227:A	-0.799	9	-0.861, -0.775	9.9	e	f	54/55	D		227	D	ASP:227:A	-0.669	8	-0.849, -0.536	9.7	e	f	148/152	D,F,S,N		227	D	ASP:227:A	-0.828	9	-0.882, -0.807	9.9	e	f	101/103	D
228	I	ILE:228:A	-0.420	7	-0.534, -0.364	8.7	e		150/150	I,M,L,Q,R,K,N			228	I	ILE:228:A	-0.473	8	-0.672, -0.332	9.7	e	f	54/55	I,V,M,L		228	I	ILE:228:A	-0.654	8	-0.813, -0.536	9.7	e	f	148/152	I,L,V,M		228	I	ILE:228:A	-0.553	8	-0.710, -0.454	9.7	e	f	101/103	I,V,M,L
229	N	ASN:229:A	-0.677	9	-0.742, -0.648	9.9	e	f	150/150	N,H,D			229	N	ASN:229:A	-0.631	8	-0.753, -0.557	9.8	e	f	54/55	N,S,D		229	N	ASN:229:A	-0.785	8	-0.912, -0.690	9.8	e	f	147/152	N,C,S,D		229	N	ASN:229:A	-0.686	9	-0.807, -0.602	9.8	e	f	101/103	N,S,D
230	S	SER:230:A	-0.197	6	-0.364, -0.098	7.6	b		150/150	S,A,N,G,H			230	S	SER:230:A	-0.572	8	-0.729, -0.458	9.8	b		54/55	A,T,S		230	S	SER:230:A	-0.621	8	-0.813, -0.476	9.7	b		147/152	A,Q,S,T		230	S	SER:230:A	-0.634	8	-0.764, -0.558	9.8	b		101/103	A,T,S
231	S	SER:231:A	0.307	5	0.026, 0.365	5.4	e		150/150	S,H,Y,N,R,F,M,A			231	S	SER:231:A	0.492	4	0.041, 0.793	5.4	e		54/55	L,M,S,A,T,K		231	S	SER:231:A	0.454	4	0.026, 0.659	5.4	e		148/152	H,K,A,Y,R,L,M,S,T		231	S	SER:231:A	0.295	5	-0.058, 0.564	5.4	e		101/103	L,M,S,A,T,K,H
232	A	ALA:232:A	-0.768	9	-0.804, -0.758	9.9	b	s	150/150	A,G			232	A	ALA:232:A	-0.806	9	-0.861, -0.793	9.9	b	s	54/55	A		232	A	ALA:232:A	-0.900	9	-1.012, -0.849	9.9	b	s	148/152	A,W		232	A	ALA:232:A	-0.834	9	-0.882, -0.825	9.9	b	s	101/103	A
233	I	ILE:233:A	-0.751	9	-0.799, -0.723	9.9	b	s	150/150	I,C			233	I	ILE:233:A	-0.585	8	-0.729, -0.510	9.8	b		54/55	T,V,I		233	I	ILE:233:A	-0.640	8	-0.849, -0.536	9.7	b		148/152	C,T,V,I		233	I	ILE:233:A	-0.503	8	-0.678, -0.393	9.7	b		101/103	T,V,I,C
234	V	VAL:234:A	-0.519	8	-0.615, -0.485	8.8	b		150/150	V,I,T			234	V	VAL:234:A	-0.281	7	-0.510, -0.171	8.6	b		54/55	V,T,C		234	V	VAL:234:A	-0.493	7	-0.734, -0.341	8.7	b		147/152	V,L,T,C		234	V	VAL:234:A	-0.391	7	-0.602, -0.247	8.6	b		101/103	V,T,C
235	T	THR:235:A	-0.804	9	-0.815, -0.799	9.9	b	s	150/150	T			235	T	THR:235:A	-0.807	9	-0.861, -0.793	9.9	b	s	54/55	T		235	T	THR:235:A	-0.996	9	-1.059, -0.967	9.9	b	s	146/152	T		235	T	THR:235:A	-0.836	9	-0.882, -0.825	9.9	b	s	101/103	T
236	G	GLY:236:A	-0.788	9	-0.814, -0.782	9.9	b	s	150/150	G			236	G	GLY:236:A	-0.748	9	-0.857, -0.702	9.9	b	s	54/55	G		236	G	GLY:236:A	-0.733	8	-0.941, -0.591	9.8	b		146/152	G,S		236	G	GLY:236:A	-0.781	9	-0.878, -0.739	9.9	b	s	101/103	G
237	K	LYS:237:A	-0.801	9	-0.814, -0.799	9.9	b	s	150/150	K			237	K	LYS:237:A	-0.806	9	-0.861, -0.793	9.9	b	s	54/55	K		237	K	LYS:237:A	-0.994	9	-1.059, -0.967	9.9	b	s	146/152	K		237	K	LYS:237:A	-0.834	9	-0.882, -0.825	9.9	b	s	101/103	K
238	P	PRO:238:A	-0.783	9	-0.814, -0.771	9.9	e	f	150/150	P			238	P	PRO:238:A	-0.765	9	-0.857, -0.729	9.9	e	f	54/55	P		238	P	PRO:238:A	-0.944	9	-1.047, -0.912	9.9	e	f	146/152	P		238	P	PRO:238:A	-0.797	9	-0.882, -0.764	9.9	e	f	101/103	P
239	V	VAL:239:A	-0.727	9	-0.771, -0.702	9.9	e	f	150/150	V,I			239	V	VAL:239:A	-0.049	5	-0.398, 0.174	7.5	e		54/55	L,V,I		239	V	VAL:239:A	-0.366	7	-0.591, -0.177	8.6	e		146/152	I,L,V		239	V	VAL:239:A	-0.108	6	-0.393, 0.059	7.5	e		101/103	L,V,I
240	H	HIS:240:A	-0.325	7	-0.485, -0.288	8.7	e		150/150	H,N,S,T,L,P,V,I,A			240	H	HIS:240:A	-0.134	6	-0.398, 0.041	7.5	e		54/55	H,N,A,S,E,D		240	H	HIS:240:A	-0.036	5	-0.341, 0.148	7.5	e		146/152	S,N,R,C,H,A,E,D		240	H	HIS:240:A	-0.186	6	-0.454, -0.058	7.5	e		101/103	H,N,A,S,E,D
241	N	ASN:241:A	-0.493	8	-0.615, -0.429	8.7	e	f	150/150	N,Q,S,V,T,A,M,L			241	N	ASN:241:A	0.638	4	0.174, 0.793	5.4	e		54/55	Q,I,V,N,T,S,F,M,L		241	N	ASN:241:A	0.003	5	-0.263, 0.148	6.5	e		146/152	Q,I,V,N,T,S,F,M,L		241	N	ASN:241:A	0.313	5	-0.058, 0.564	5.4	e		101/103	Q,I,V,N,T,S,F,M,L
242	G	GLY:242:A	-0.788	9	-0.814, -0.782	9.9	e	f	150/150	G			242	G	GLY:242:A	-0.748	9	-0.857, -0.702	9.9	e	f	54/55	G		242	G	GLY:242:A	-0.731	8	-0.941, -0.591	9.8	e	f	146/152	G,R		242	G	GLY:242:A	-0.781	9	-0.878, -0.739	9.9	e	f	101/103	G
243	G	GLY:243:A	-0.788	9	-0.814, -0.782	9.9	b	s	150/150	G			243	G	GLY:243:A	-0.748	9	-0.857, -0.702	9.9	b	s	54/55	G		243	G	GLY:243:A	-0.923	9	-1.047, -0.882	9.9	b	s	146/152	G		243	G	GLY:243:A	-0.781	9	-0.878, -0.739	9.9	b	s	101/103	G
244	I	ILE:244:A	-0.805	9	-0.815, -0.804	9.9	b	s	150/150	I			244	I	ILE:244:A	-0.343	7	-0.557, -0.171	8.6	b		54/55	I,V		244	I	ILE:244:A	-0.643	8	-0.813, -0.536	9.7	b		146/152	I,V		244	I	ILE:244:A	-0.449	7	-0.642, -0.324	8.7	b		101/103	I,V
245	N	ASN:245:A	-0.636	9	-0.723, -0.577	9.8	e	f	150/150	N,H,E,R,Q			245	N	ASN:245:A	-0.583	8	-0.729, -0.510	9.8	e	f	54/55	R,N		245	N	ASN:245:A	-0.624	8	-0.813, -0.536	9.7	e	f	146/152	H,Y,R,N		245	N	ASN:245:A	-0.548	8	-0.710, -0.454	9.7	e	f	101/103	R,N,H
246	G	GLY:246:A	-0.788	9	-0.814, -0.782	9.9	e	f	150/150	G			246	G	GLY:246:A	-0.748	9	-0.857, -0.702	9.9	e	f	54/55	G		246	G	GLY:246:A	-0.536	7	-0.813, -0.341	9.7	e		146/152	G,E,R		246	G	GLY:246:A	-0.781	9	-0.878, -0.739	9.9	e	f	101/103	G
247	R	ARG:247:A	-0.799	9	-0.814, -0.799	9.9	e	f	150/150	R			247	R	ARG:247:A	-0.798	9	-0.861, -0.775	9.9	e	f	54/55	R		247	R	ARG:247:A	-0.661	8	-0.849, -0.536	9.7	e	f	146/152	R,Q,C,W		247	R	ARG:247:A	-0.827	9	-0.882, -0.807	9.9	e	f	101/103	R
248	H	HIS:248:A	0.220	5	-0.098, 0.365	6.4	e		150/150	H,V,I,T			248	H	HIS:248:A	0.024	5	-0.332, 0.174	7.5	e		54/55	T,H,F,E,N,A		248	H	HIS:248:A	-0.084	5	-0.411, 0.148	7.5	e		146/152	I,V,T,H,F,E,N,A		248	H	HIS:248:A	-0.023	5	-0.324, 0.196	7.5	e		101/103	T,H,F,E,N,A,V
249	S	SER:249:A	-0.754	9	-0.791, -0.742	9.9	b	s	150/150	S,A,P			249	S	SER:249:A	-0.130	6	-0.398, 0.041	7.5	b		54/55	E,A,S,Q		249	S	SER:249:A	-0.234	6	-0.476, -0.081	7.5	b		146/152	S,F,T,E,A,Q		249	S	SER:249:A	-0.280	6	-0.509, -0.159	8.6	b		101/103	E,A,S,Q
250	A	ALA:250:A	-0.802	9	-0.815, -0.799	9.9	b	s	150/150	A			250	A	ALA:250:A	-0.806	9	-0.861, -0.793	9.9	b	s	54/55	A		250	A	ALA:250:A	-0.804	9	-0.941, -0.734	9.8	b	s	146/152	A,G,V		250	A	ALA:250:A	-0.834	9	-0.882, -0.825	9.9	b	s	101/103	A
251	T	THR:251:A	-0.804	9	-0.815, -0.799	9.9	e	f	150/150	T			251	T	THR:251:A	-0.807	9	-0.861, -0.793	9.9	e	f	54/55	T		251	T	THR:251:A	-0.717	8	-0.882, -0.642	9.8	e	f	146/152	T,C,A,I		251	T	THR:251:A	-0.836	9	-0.882, -0.825	9.9	e	f	101/103	T
252	G	GLY:252:A	-0.788	9	-0.814, -0.782	9.9	b	s	150/150	G			252	G	GLY:252:A	-0.748	9	-0.857, -0.702	9.9	b	s	54/55	G		252	G	GLY:252:A	-0.923	9	-1.047, -0.882	9.9	b	s	146/152	G		252	G	GLY:252:A	-0.781	9	-0.878, -0.739	9.9	b	s	101/103	G
253	R	ARG:253:A	-0.799	9	-0.814, -0.799	9.9	e	f	150/150	R			253	R	ARG:253:A	-0.665	9	-0.793, -0.600	9.8	e	f	54/55	R,K		253	R	ARG:253:A	-0.658	8	-0.849, -0.536	9.7	e	f	144/152	R,Q,H,K		253	R	ARG:253:A	-0.714	9	-0.825, -0.642	9.8	e	f	101/103	R,K
254	G	GLY:254:A	-0.788	9	-0.814, -0.782	9.9	b	s	150/150	G			254	G	GLY:254:A	-0.748	9	-0.857, -0.702	9.9	b	s	54/55	G		254	G	GLY:254:A	-0.523	7	-0.813, -0.341	9.7	b		144/152	G,V,R		254	G	GLY:254:A	-0.781	9	-0.878, -0.739	9.9	b	s	101/103	G
255	V	VAL:255:A	-0.472	8	-0.577, -0.429	8.7	b		150/150	V,I,L			255	V	VAL:255:A	-0.674	9	-0.809, -0.600	9.8	b	s	53/55	V,L		255	V	VAL:255:A	-0.156	6	-0.476, 0.026	7.5	b		144/152	V,L,X,I		255	V	VAL:255:A	-0.723	9	-0.840, -0.678	9.9	b	s	100/103	V,L
256	W	TRP:256:A	-0.310	7	-0.485, -0.201	8.6	e		150/150	W,F,Y			256	W	TRP:256:A	-0.055	5	-0.458, 0.174	8.5	e		53/55	F,Y,W		256	W	TRP:256:A	-0.439	7	-0.734, -0.263	8.6	e		145/152	F,Y,W		256	W	TRP:256:A	-0.200	6	-0.509, 0.059	8.5	e		100/103	F,Y,W
257	K	LYS:257:A	-0.695	9	-0.758, -0.648	9.9	b	s	150/150	K,H,Y,N			257	K	LYS:257:A	-0.681	9	-0.809, -0.600	9.8	b	s	53/55	I,K		257	K	LYS:257:A	-0.353	7	-0.591, -0.177	8.6	b		145/152	H,Q,Y,L,R,I,K		257	K	LYS:257:A	-0.603	8	-0.764, -0.509	9.8	b		100/103	I,K,H
258	A	ALA:258:A	-0.720	9	-0.791, -0.677	9.9	b	s	150/150	A,G			258	A	ALA:258:A	0.432	4	0.041, 0.793	5.4	b		53/55	A,S,T		258	A	ALA:258:A	0.363	5	-0.081, 0.659	5.4	b		145/152	G,E,A,S,T		258	A	ALA:258:A	0.337	5	-0.058, 0.564	5.4	b		100/103	A,S,T,G
259	G	GLY:259:A	0.271	5	0.026, 0.365	5.4	b		150/150	G,L,I,T,V			259	G	GLY:259:A	-0.186	6	-0.510, 0.041	8.5	b		53/55	T,A,G		259	G	GLY:259:A	-0.030	5	-0.341, 0.148	7.5	b		145/152	I,L,V,T,A,G		259	G	GLY:259:A	-0.093	5	-0.454, 0.059	7.5	b		100/103	T,A,G,L
260	D	ASP:260:A	0.217	5	-0.098, 0.365	6.4	b		150/150	D,E,Q,N,A,Y			260	D	ASP:260:A	-0.416	7	-0.638, -0.257	9.6	b		53/55	N,E,D		260	D	ASP:260:A	-0.407	7	-0.642, -0.263	8.6	b		145/152	E,D,Q,N		260	D	ASP:260:A	-0.379	7	-0.602, -0.247	8.6	b		100/103	N,E,D
261	L	LEU:261:A	-0.637	9	-0.723, -0.577	9.8	e	f	150/150	L,N,Q,V,T			261	L	LEU:261:A	0.584	4	0.041, 0.793	5.4	e		53/55	C,V,L,I,M		261	L	LEU:261:A	0.088	5	-0.263, 0.289	6.5	e		145/152	N,H,C,V,L,I,M		261	L	LEU:261:A	0.470	4	0.059, 0.827	5.4	e		100/103	C,V,L,I,M,N
262	F	PHE:262:A	-0.754	9	-0.799, -0.723	9.9	b	s	150/150	F,Y			262	F	PHE:262:A	-0.777	9	-0.857, -0.753	9.9	b	s	53/55	F		262	F	PHE:262:A	-0.819	9	-0.991, -0.734	9.8	b	s	145/152	F,L		262	F	PHE:262:A	-0.808	9	-0.882, -0.787	9.9	b	s	100/103	F
263	L	LEU:263:A	0.370	4	0.026, 0.613	5.4	b		150/150	L,I,V,M,A,C,S,T			263	L	LEU:263:A	0.926	4	0.336, 1.150	5.3	b		53/55	V,A,T,I,L,M		263	L	LEU:263:A	0.444	4	0.026, 0.659	5.4	b		145/152	I,V,N,A,T,L,M		263	L	LEU:263:A	0.610	4	0.196, 0.827	5.4	b		100/103	V,A,T,I,L,M
264	K	LYS:264:A	-0.035	5	-0.201, 0.026	6.5	e		150/150	K,N,M,C,Q,H,L,D,E			264	K	LYS:264:A	0.382	4	-0.073, 0.535	5.4	e		53/55	R,M,N,Q,K		264	K	LYS:264:A	0.353	5	0.026, 0.659	5.4	e		145/152	N,K,R,S,T,M,Q		264	K	LYS:264:A	0.475	4	0.059, 0.827	5.4	e		100/103	R,M,N,Q,K
265	D	ASP:265:A	-0.250	6	-0.429, -0.201	7.6	e		150/150	D,E,S,N			265	D	ASP:265:A	-0.541	8	-0.729, -0.458	9.8	e	f	53/55	E,D		265	D	ASP:265:A	-0.603	8	-0.813, -0.476	9.7	e	f	145/152	E,D		265	D	ASP:265:A	-0.614	8	-0.764, -0.509	9.8	e	f	100/103	E,D
266	K	LYS:266:A	0.195	5	-0.098, 0.365	6.4	e		150/150	K,A,D,S,P,E,T,H,R,G,Q,V			266	K	LYS:266:A	0.391	4	-0.073, 0.535	5.4	e		53/55	K,T,Q,A,P,E		266	K	LYS:266:A	0.139	5	-0.177, 0.289	6.5	e		145/152	A,T,K,Q,P,E		266	K	LYS:266:A	0.311	5	-0.058, 0.564	5.4	e		100/103	K,T,Q,A,P,E
267	E	GLU:267:A	0.202	5	-0.098, 0.365	6.4	e		150/150	E,N,S,G,A,T,R,Q,L,Y,P,F,K			267	E	GLU:267:A	0.884	4	0.336, 1.150	5.3	e		53/55	E,D,N,G,S,Q,K		267	E	GLU:267:A	0.555	4	0.148, 0.915	5.4	e		145/152	S,N,P,E,D,G,Q,K		267	E	GLU:267:A	0.707	4	0.196, 0.827	5.4	e		100/103	E,D,N,G,S,Q,K
268	W	TRP:268:A	0.419	4	0.026, 0.613	5.4	b		150/150	W,Y,F,L,C			268	W	TRP:268:A	-0.741	9	-0.857, -0.702	9.9	b	s	53/55	W		268	W	TRP:268:A	-0.232	6	-0.591, 0.026	8.5	b		145/152	Y,F,C,W		268	W	TRP:268:A	-0.369	7	-0.642, -0.159	8.6	b		100/103	W,Y,F
269	M	MET:269:A	-0.735	9	-0.782, -0.702	9.9	b	s	150/150	M,T			269	M	MET:269:A	-0.813	9	-0.861, -0.793	9.9	b	s	53/55	M		269	M	MET:269:A	-0.848	9	-0.967, -0.775	9.8	b	s	149/152	M,T		269	M	MET:269:A	-0.841	9	-0.882, -0.825	9.9	b	s	101/103	M
270	D	ASP:270:A	0.361	4	0.026, 0.613	5.4	e		150/150	D,S,G,A,Q,K,E,N			270	D	ASP:270:A	0.075	5	-0.257, 0.336	6.5	e		53/55	N,R,D,K,G,E		270	D	ASP:270:A	0.420	4	0.026, 0.659	5.4	e		149/152	S,G,A,P,D,N,R,K,E		270	D	ASP:270:A	0.250	5	-0.159, 0.564	6.4	e		101/103	N,R,D,K,G,E,A,S
271	L	LEU:271:A	0.815	4	0.365, 0.961	4.4	e		150/150	L,M,I,Q,K,A,V,S,T,R			271	L	LEU:271:A	0.465	4	0.041, 0.793	5.4	e		53/55	A,E,L,V,Q,M,F		271	L	LEU:271:A	0.941	4	0.456, 1.265	4.3	e		149/152	I,L,M,Q,V,F,N,A,E		271	L	LEU:271:A	0.502	4	0.059, 0.827	5.4	e		101/103	A,E,L,V,Q,M,F
272	L	LEU:272:A	0.143	5	-0.098, 0.176	6.5	b		150/150	L,I,V,C,M			272	L	LEU:272:A	0.500	4	0.041, 0.793	5.4	b		53/55	I,V,L		272	L	LEU:272:A	0.448	4	0.026, 0.659	5.4	b		149/152	L,I,V		272	L	LEU:272:A	0.307	5	-0.058, 0.564	5.4	b		101/103	I,V,L
273	K	LYS:273:A	-0.343	7	-0.534, -0.201	8.6	e		150/150	K,G,A,D,S,E,N			273	K	LYS:273:A	0.170	5	-0.257, 0.336	6.5	e		53/55	G,K,N,Q		273	K	LYS:273:A	-0.133	6	-0.476, 0.148	7.5	e		148/152	G,K,N,Q		273	K	LYS:273:A	0.042	5	-0.324, 0.196	7.5	e		101/103	G,K,N,Q
274	W	TRP:274:A	0.544	4	0.176, 0.613	5.4	e		150/150	W,T,M,L,C,S,I,Q,H,N,A,V			274	W	TRP:274:A	1.008	4	0.336, 1.150	5.3	e		53/55	L,W,F		274	W	TRP:274:A	0.433	4	0.026, 0.659	5.4	e		148/152	M,T,L,W,F		274	W	TRP:274:A	0.784	4	0.196, 1.189	5.3	e		101/103	L,W,F,T
275	K	LYS:275:A	0.188	5	-0.098, 0.365	6.4	e		150/150	K,T,D,S,E,C,N,L,P,A,I,F			275	K	LYS:275:A	0.070	5	-0.257, 0.336	6.5	e		53/55	E,K,Q,T,N,S		275	K	LYS:275:A	-0.223	6	-0.476, -0.081	7.5	e		148/152	T,E,K,Q,N,S		275	K	LYS:275:A	0.026	5	-0.247, 0.196	6.5	e		101/103	E,K,Q,T,N,S
276	T	THR:276:A	0.116	5	-0.201, 0.365	6.4	e		150/150	T,P,V,Q			276	T	THR:276:A	-0.528	8	-0.702, -0.398	9.7	e	f	53/55	P,T		276	T	THR:276:A	-0.613	8	-0.813, -0.476	9.7	e	f	149/152	P,T		276	T	THR:276:A	-0.580	8	-0.739, -0.454	9.7	e	f	101/103	P,T
277	G	GLY:277:A	-0.788	9	-0.814, -0.782	9.9	e	f	150/150	G			277	G	GLY:277:A	-0.746	9	-0.857, -0.702	9.9	e	f	53/55	G		277	G	GLY:277:A	-0.741	8	-0.941, -0.642	9.8	e	f	149/152	G,A		277	G	GLY:277:A	-0.781	9	-0.878, -0.739	9.9	e	f	101/103	G
278	W	TRP:278:A	0.828	4	0.365, 0.961	4.4	b		150/150	W,F,I,M,L,V,Y			278	W	TRP:278:A	-0.314	7	-0.600, -0.171	8.6	b		53/55	M,L,W		278	W	TRP:278:A	0.065	5	-0.341, 0.289	7.5	b		149/152	F,W,L,M		278	W	TRP:278:A	-0.402	7	-0.678, -0.247	9.6	b		101/103	M,L,W
279	K	LYS:279:A	2.476	1	0.961, 3.130	4.1	e		150/150	K,G,A,E,Q,R,T,D,H,P,L,N,I,M			279	K	LYS:279:A	0.640	4	0.174, 0.793	5.4	e		53/55	E,K,D,Q,R		279	K	LYS:279:A	0.916	4	0.456, 1.265	4.3	e		148/152	G,X,W,Q,R,E,K,D		279	K	LYS:279:A	0.663	4	0.196, 0.827	5.4	e		101/103	E,K,D,Q,R,G
280	D	ASP:280:A	0.528	4	0.176, 0.613	5.4	e		150/150	D,G,N,E			280	D	ASP:280:A	-0.471	8	-0.672, -0.332	9.7	e	f	53/55	G,D		280	D	ASP:280:A	-0.361	7	-0.642, -0.177	8.6	e		149/152	D,G,N,E		280	D	ASP:280:A	-0.525	8	-0.710, -0.393	9.7	e	f	101/103	G,D
281	K	LYS:281:A	-0.801	9	-0.814, -0.799	9.9	b	s	150/150	K			281	K	LYS:281:A	-0.805	9	-0.861, -0.793	9.9	b	s	53/55	K		281	K	LYS:281:A	-0.995	9	-1.059, -0.967	9.9	b	s	148/152	K		281	K	LYS:281:A	-0.834	9	-0.882, -0.825	9.9	b	s	101/103	K
282	T	THR:282:A	-0.626	8	-0.702, -0.577	9.8	e	f	150/150	T,S,K			282	T	THR:282:A	0.477	4	0.041, 0.793	5.4	e		53/55	T,S,R,K		282	T	THR:282:A	0.929	4	0.456, 1.265	4.3	e		148/152	T,S,I,R,K		282	T	THR:282:A	0.717	4	0.196, 0.827	5.4	e		101/103	T,S,R,K
283	V	VAL:283:A	-0.104	6	-0.288, 0.026	7.5	b		150/150	V,F,Y,A,C,I			283	V	VAL:283:A	-0.159	6	-0.458, 0.041	8.5	b		53/55	V,C,A,I		283	V	VAL:283:A	-0.284	6	-0.536, -0.081	7.5	b		148/152	F,V,C,A,I		283	V	VAL:283:A	-0.112	6	-0.393, 0.059	7.5	b		101/103	V,C,A,I,F
284	I	ILE:284:A	-0.511	8	-0.615, -0.429	8.7	b		150/150	I,V,A			284	I	ILE:284:A	-0.588	8	-0.753, -0.510	9.8	b		53/55	I,V		284	I	ILE:284:A	-0.453	7	-0.690, -0.341	8.7	b		148/152	V,A,I		284	I	ILE:284:A	-0.650	8	-0.787, -0.558	9.8	b		101/103	I,V
285	V	VAL:285:A	0.363	4	0.026, 0.613	5.4	b		150/150	V,I,L			285	V	VAL:285:A	-0.406	7	-0.638, -0.257	9.6	b		53/55	I,V,C		285	V	VAL:285:A	-0.601	8	-0.813, -0.476	9.7	b		149/152	V,A,I,C		285	V	VAL:285:A	-0.502	8	-0.678, -0.393	9.7	b		101/103	I,V,C
286	Q	GLN:286:A	-0.804	9	-0.815, -0.799	9.9	b	s	150/150	Q			286	Q	GLN:286:A	-0.815	9	-0.861, -0.793	9.9	b	s	53/55	Q		286	Q	GLN:286:A	-0.932	9	-1.031, -0.882	9.9	b	s	149/152	Q,E		286	Q	GLN:286:A	-0.843	9	-0.882, -0.825	9.9	b	s	101/103	Q
287	G	GLY:287:A	-0.788	9	-0.814, -0.782	9.9	b	s	150/150	G			287	G	GLY:287:A	-0.746	9	-0.857, -0.702	9.9	b	s	53/55	G		287	G	GLY:287:A	-0.736	8	-0.941, -0.642	9.8	b		149/152	G,E		287	G	GLY:287:A	-0.781	9	-0.878, -0.739	9.9	b	s	101/103	G
288	F	PHE:288:A	-0.433	7	-0.577, -0.364	8.7	b		150/150	F,L,V,A			288	F	PHE:288:A	-0.045	5	-0.398, 0.174	7.5	b		53/55	Y,F		288	F	PHE:288:A	-0.408	7	-0.690, -0.263	8.6	b		149/152	F,Y		288	F	PHE:288:A	-0.187	6	-0.509, -0.058	8.5	b		101/103	Y,F
289	G	GLY:289:A	-0.788	9	-0.814, -0.782	9.9	e	f	150/150	G			289	G	GLY:289:A	-0.746	9	-0.857, -0.702	9.9	e	f	53/55	G		289	G	GLY:289:A	-0.738	8	-0.941, -0.642	9.8	e	f	149/152	G,C		289	G	GLY:289:A	-0.781	9	-0.878, -0.739	9.9	e	f	101/103	G
290	N	ASN:290:A	-0.803	9	-0.815, -0.799	9.9	e	f	150/150	N			290	N	ASN:290:A	-0.817	9	-0.861, -0.809	9.9	e	f	53/55	N		290	N	ASN:290:A	-0.939	9	-1.031, -0.882	9.9	e	f	149/152	N,D		290	N	ASN:290:A	-0.845	9	-0.884, -0.825	9.9	e	f	101/103	N
291	V	VAL:291:A	-0.804	9	-0.815, -0.804	9.9	e	f	150/150	V			291	V	VAL:291:A	-0.803	9	-0.861, -0.793	9.9	e	f	53/55	V		291	V	VAL:291:A	-0.899	9	-1.012, -0.849	9.9	e	f	149/152	V,E		291	V	VAL:291:A	-0.833	9	-0.882, -0.807	9.9	e	f	101/103	V
292	G	GLY:292:A	-0.788	9	-0.814, -0.782	9.9	b	s	150/150	G			292	G	GLY:292:A	-0.746	9	-0.857, -0.702	9.9	b	s	53/55	G		292	G	GLY:292:A	-0.926	9	-1.047, -0.882	9.9	b	s	149/152	G		292	G	GLY:292:A	-0.781	9	-0.878, -0.739	9.9	b	s	101/103	G
293	S	SER:293:A	-0.179	6	-0.364, -0.098	7.6	b		150/150	S,L,M,F,Y,R			293	S	SER:293:A	-0.499	8	-0.672, -0.398	9.7	b		53/55	M,Q,S,T		293	S	SER:293:A	-0.322	6	-0.591, -0.177	8.6	b		149/152	L,Q,R,F,M,S,T		293	S	SER:293:A	-0.458	7	-0.642, -0.324	8.7	b		101/103	M,Q,S,T,L
294	F	PHE:294:A	-0.732	9	-0.782, -0.702	9.9	e	f	150/150	F,H,Y			294	F	PHE:294:A	0.771	4	0.174, 1.150	5.3	e		53/55	Y,H,F,W		294	F	PHE:294:A	0.703	4	0.148, 0.915	5.4	e		150/152	H,Y,P,F,W		294	F	PHE:294:A	0.585	4	0.059, 0.827	5.4	e		101/103	Y,H,F,W
295	A	ALA:295:A	0.054	5	-0.201, 0.176	6.5	b		150/150	A,T,S,V,C			295	A	ALA:295:A	-0.805	9	-0.861, -0.793	9.9	b	s	53/55	A		295	A	ALA:295:A	-0.560	7	-0.775, -0.411	8.7	b		150/152	S,T,A		295	A	ALA:295:A	-0.533	8	-0.710, -0.454	9.7	b		101/103	A,S,T
296	A	ALA:296:A	-0.177	6	-0.364, -0.098	7.6	b		150/150	A,C,M,T,I			296	A	ALA:296:A	0.200	5	-0.171, 0.336	6.5	b		53/55	A,G,S		296	A	ALA:296:A	0.285	5	-0.081, 0.456	5.4	b		150/152	M,C,T,A,G,S		296	A	ALA:296:A	0.443	4	0.059, 0.564	5.4	b		101/103	A,G,S,C,T
297	K	LYS:297:A	-0.718	9	-0.771, -0.677	9.9	e	f	150/150	K,R			297	K	LYS:297:A	-0.136	6	-0.398, 0.041	7.5	e		53/55	H,E,V,L,K,I		297	K	LYS:297:A	-0.266	6	-0.536, -0.081	7.5	e		150/152	R,K,H,E,V,L,I		297	K	LYS:297:A	-0.150	6	-0.393, 0.059	7.5	e		101/103	H,E,V,L,K,I,R
298	Y	TYR:298:A	-0.746	9	-0.799, -0.723	9.9	b	s	150/150	Y,N			298	Y	TYR:298:A	0.126	5	-0.257, 0.336	6.5	b		53/55	F,H,Y,S		298	Y	TYR:298:A	-0.126	6	-0.476, 0.148	7.5	b		150/152	Y,F,H,S		298	Y	TYR:298:A	0.123	5	-0.247, 0.360	6.5	b		101/103	F,H,Y,S
299	V	VAL:299:A	-0.462	8	-0.577, -0.364	8.7	b		150/150	V,L,F,I			299	V	VAL:299:A	-0.228	6	-0.510, -0.073	8.5	b		53/55	F,V,I,A		299	V	VAL:299:A	-0.388	7	-0.642, -0.263	8.6	b		150/152	L,F,V,I,A		299	V	VAL:299:A	-0.199	6	-0.454, -0.058	7.5	b		101/103	F,V,I,A,L
300	H	HIS:300:A	0.287	5	0.026, 0.365	5.4	e		150/150	H,V,T,C,D,N,A,S			300	H	HIS:300:A	-0.227	6	-0.510, -0.073	8.5	e		53/55	K,H,V,N,F		300	H	HIS:300:A	-0.243	6	-0.536, -0.081	7.5	e		150/152	H,C,T,A,K,V,N,F		300	H	HIS:300:A	0.063	5	-0.247, 0.196	6.5	e		101/103	K,H,V,N,F,C,T,A
301	E	GLU:301:A	-0.619	8	-0.702, -0.577	9.8	e	f	150/150	E,R,Y,G,C			301	E	GLU:301:A	0.154	5	-0.171, 0.336	6.5	e		53/55	Q,K,R,E,D		301	E	GLU:301:A	0.506	4	0.148, 0.659	5.4	e		150/152	R,H,N,C,Q,K,E,D		301	E	GLU:301:A	0.100	5	-0.247, 0.360	6.5	e		101/103	Q,K,R,E,D
302	A	ALA:302:A	0.152	5	-0.098, 0.365	6.4	e		150/150	A,F,Y,V,S,N,H,Q,D			302	A	ALA:302:A	-0.685	9	-0.809, -0.638	9.9	e	f	53/55	A,V		302	A	ALA:302:A	-0.593	8	-0.775, -0.476	8.7	e	f	150/152	F,A,S,V		302	A	ALA:302:A	-0.733	9	-0.840, -0.678	9.9	e	f	101/103	A,V
303	G	GLY:303:A	-0.646	9	-0.742, -0.577	9.8	e	f	150/150	G,D,H			303	G	GLY:303:A	-0.746	9	-0.857, -0.702	9.9	e	f	53/55	G		303	G	GLY:303:A	-0.367	7	-0.690, -0.177	8.6	e		150/152	G,R,S		303	G	GLY:303:A	-0.781	9	-0.878, -0.739	9.9	e	f	101/103	G
304	A	ALA:304:A	-0.634	9	-0.723, -0.577	9.8	b	s	150/150	A,G,C,V			304	A	ALA:304:A	-0.364	7	-0.600, -0.257	8.6	b		53/55	C,A,G		304	A	ALA:304:A	-0.582	8	-0.775, -0.476	8.7	b		150/152	A,G,C		304	A	ALA:304:A	-0.478	8	-0.678, -0.393	9.7	b		101/103	C,A,G
305	K	LYS:305:A	0.698	4	0.365, 0.961	4.4	e		150/150	K,T,V,A,R,S,I			305	K	LYS:305:A	-0.805	9	-0.861, -0.793	9.9	e	f	53/55	K		305	K	LYS:305:A	-0.904	9	-1.012, -0.849	9.9	e	f	150/152	K,T		305	K	LYS:305:A	-0.731	9	-0.840, -0.678	9.9	e	f	101/103	K,T
306	V	VAL:306:A	-0.460	8	-0.577, -0.364	8.7	b		150/150	V,C,I			306	V	VAL:306:A	0.067	5	-0.257, 0.336	6.5	b		53/55	V,I,L		306	V	VAL:306:A	0.108	5	-0.263, 0.289	6.5	b		150/152	C,G,V,I,L		306	V	VAL:306:A	0.117	5	-0.247, 0.360	6.5	b		101/103	V,I,L,C
307	I	ILE:307:A	0.117	5	-0.098, 0.176	6.5	b		150/150	I,V			307	I	ILE:307:A	-0.588	8	-0.753, -0.510	9.8	b		53/55	I,V		307	I	ILE:307:A	0.275	5	-0.081, 0.456	5.4	b		150/152	I,V		307	I	ILE:307:A	-0.268	6	-0.509, -0.159	8.6	b		101/103	I,V
308	G	GLY:308:A	-0.719	9	-0.791, -0.677	9.9	b	s	150/150	G,A			308	G	GLY:308:A	-0.746	9	-0.857, -0.702	9.9	b	s	53/55	G		308	G	GLY:308:A	-0.072	5	-0.411, 0.148	7.5	b		150/152	A,G		308	G	GLY:308:A	-0.781	9	-0.878, -0.739	9.9	b	s	101/103	G
309	I	ILE:309:A	0.447	4	0.176, 0.613	5.4	b		150/150	I,V			309	I	ILE:309:A	0.053	5	-0.257, 0.174	6.5	b		53/55	I,V,L		309	I	ILE:309:A	0.144	5	-0.177, 0.289	6.5	b		150/152	V,I,L		309	I	ILE:309:A	0.317	5	-0.058, 0.564	5.4	b		101/103	I,V,L
310	K	LYS:310:A	1.244	3	0.613, 1.523	4.3	e		150/150	K,I,L,G,M,A,V,T,C,Q			310	K	LYS:310:A	-0.086	5	-0.398, 0.041	7.5	e		53/55	K,I,Q,H,E		310	K	LYS:310:A	0.332	5	-0.081, 0.659	5.4	e		150/152	G,I,V,D,S,K,Q,H,E		310	K	LYS:310:A	0.028	5	-0.247, 0.196	6.5	e		101/103	K,I,Q,H,E,V
311	E	GLU:311:A	-0.798	9	-0.814, -0.791	9.9	e	f	150/150	E			311	E	GLU:311:A	-0.810	9	-0.861, -0.793	9.9	e	f	53/55	E		311	E	GLU:311:A	-0.917	9	-1.012, -0.849	9.9	e	f	150/152	E,D		311	E	GLU:311:A	-0.839	9	-0.882, -0.825	9.9	e	f	101/103	E
312	F	PHE:312:A	3.102	1	1.523, 3.130	3.1	e		150/150	F,H,R,S,V,Y,I,L,W,M,K			312	F	PHE:312:A	3.290	1	1.720, 3.313	3.1	e		53/55	A,R,K,I,V,F,M,H,W,S,L		312	F	PHE:312:A	2.839	1	1.265, 3.287	3.1	e		150/152	S,I,H,F,A,R,K,V,M,W,L		312	F	PHE:312:A	3.273	1	1.768, 3.381	3.1	e		101/103	A,R,K,I,V,F,M,H,W,S,L
313	D	ASP:313:A	-0.376	7	-0.534, -0.288	8.7	e		150/150	D,N,E			313	D	ASP:313:A	-0.385	7	-0.600, -0.257	8.6	e		53/55	D,T,N		313	D	ASP:313:A	0.524	4	0.148, 0.915	5.4	e		150/152	D,E,V,R,N,H,T		313	D	ASP:313:A	-0.480	8	-0.678, -0.393	9.7	e	f	101/103	D,T,N
314	V	VAL:314:A	0.092	5	-0.201, 0.176	6.5	b		150/150	V,G,C,A			314	V	VAL:314:A	0.844	4	0.336, 1.150	5.3	b		53/55	V,I,F,Y,S,T,C		314	V	VAL:314:A	1.438	3	0.659, 1.809	4.3	b		150/152	G,E,R,V,I,F,Y,S,T,C		314	V	VAL:314:A	0.964	4	0.360, 1.189	5.3	b		101/103	V,I,F,Y,S,T,C,G
315	S	SER:315:A	0.411	4	0.176, 0.613	5.4	b		150/150	S,V,A,T,G,E,N,C,Q			315	S	SER:315:A	-0.617	8	-0.753, -0.557	9.8	b		53/55	S,Q,A		315	S	SER:315:A	-0.618	8	-0.775, -0.536	8.7	b		150/152	S,T,C,G,Q,A		315	S	SER:315:A	-0.505	8	-0.678, -0.393	9.7	b		101/103	S,Q,A,T,C
316	L	LEU:316:A	-0.562	8	-0.648, -0.534	9.8	b		150/150	L,I,V			316	L	LEU:316:A	0.122	5	-0.257, 0.336	6.5	b		53/55	L,I		316	L	LEU:316:A	0.305	5	-0.081, 0.456	5.4	b		150/152	I,L,T,V,M		316	L	LEU:316:A	0.197	5	-0.159, 0.360	6.5	b		101/103	L,I
317	V	VAL:317:A	1.561	3	0.961, 1.523	4.3	e		150/150	V,Y,I,F,W,S,H,C,M,Q			317	V	VAL:317:A	1.737	3	0.793, 1.720	4.3	e		53/55	M,H,V,K,Y,T,F,I		317	V	VAL:317:A	2.956	1	1.809, 3.287	3.1	e		150/152	W,Y,F,M,H,V,K,T,I		317	V	VAL:317:A	3.006	1	1.768, 3.381	3.1	e		101/103	M,H,V,K,Y,T,F,I
318	N	ASN:318:A	-0.616	8	-0.702, -0.577	9.8	e	f	150/150	N,S,C			318	N	ASN:318:A	-0.610	8	-0.753, -0.510	9.8	e	f	53/55	N,C,S		318	N	ASN:318:A	-0.629	8	-0.813, -0.536	9.7	e	f	150/152	N,S,C		318	N	ASN:318:A	-0.504	8	-0.678, -0.393	9.7	e	f	101/103	N,C,S
319	K	LYS:319:A	3.126	1	1.523, 3.130	3.1	e		150/150	K,P,S,Q,A,E,G,T,N,Y,H,D,L,R			319	K	LYS:319:A	2.604	1	1.150, 3.313	3.1	e		53/55	D,E,P,K,R,N,A,Q,T		319	K	LYS:319:A	2.511	2	1.265, 3.287	3.1	e		150/152	P,S,Q,D,E,K,R,N,A,T		319	K	LYS:319:A	2.645	1	1.189, 3.381	3.1	e		101/103	D,E,P,K,R,N,A,Q,T,S
320	D	ASP:320:A	3.105	1	1.523, 3.130	3.1	e		150/150	D,E,G,Q,N,T,K,S,A,R			320	D	ASP:320:A	0.299	5	-0.073, 0.535	5.4	e		53/55	E,S,T,N,D,Q,K		320	D	ASP:320:A	0.361	5	-0.081, 0.659	5.4	e		150/152	D,Q,E,A,R,S,T,N,K		320	D	ASP:320:A	0.286	5	-0.058, 0.564	5.4	e		101/103	E,S,T,N,D,Q,K,A
321	G	GLY:321:A	-0.788	9	-0.814, -0.782	9.9	e	f	150/150	G			321	G	GLY:321:A	-0.746	9	-0.857, -0.702	9.9	e	f	53/55	G		321	G	GLY:321:A	-0.738	8	-0.941, -0.642	9.8	e	f	150/152	G,D		321	G	GLY:321:A	-0.781	9	-0.878, -0.739	9.9	e	f	101/103	G
322	I	ILE:322:A	-0.537	8	-0.648, -0.485	9.8	b		150/150	I,M,L			322	I	ILE:322:A	-0.810	9	-0.861, -0.793	9.9	b	s	53/55	I		322	I	ILE:322:A	-0.746	8	-0.912, -0.642	9.8	b		150/152	I,F,T,N		322	I	ILE:322:A	-0.838	9	-0.882, -0.825	9.9	b	s	101/103	I
323	D	ASP:323:A	-0.153	6	-0.364, -0.098	7.6	e		150/150	D,S,N,H			323	D	ASP:323:A	-0.535	8	-0.729, -0.458	9.8	e	f	53/55	D,N		323	D	ASP:323:A	-0.785	8	-0.941, -0.690	9.8	e	f	150/152	D,N		323	D	ASP:323:A	-0.604	8	-0.764, -0.509	9.8	e	f	101/103	D,N
324	I	ILE:324:A	-0.503	8	-0.648, -0.429	9.7	b		150/150	I,P,A			324	I	ILE:324:A	-0.233	6	-0.510, -0.073	8.5	b		53/55	V,I,P		324	I	ILE:324:A	-0.325	6	-0.591, -0.177	8.6	b		150/152	P,V,I		324	I	ILE:324:A	-0.136	6	-0.454, 0.059	7.5	b		101/103	V,I,P
325	N	ASN:325:A	-0.341	7	-0.485, -0.288	8.7	e		150/150	N,K,R,V,I,L,T			325	N	ASN:325:A	0.691	4	0.174, 1.150	5.3	e		53/55	G,K,N,D,E,T		325	N	ASN:325:A	0.229	5	-0.081, 0.456	5.4	e		150/152	K,N,G,D,E,T		325	N	ASN:325:A	0.472	4	0.059, 0.827	5.4	e		101/103	G,K,N,D,E,T
326	D	ASP:326:A	1.197	3	0.613, 1.523	4.3	e		150/150	D,A,K,Q,E,L,H			326	D	ASP:326:A	0.134	5	-0.257, 0.336	6.5	e		54/55	E,G,A,S,D		326	D	ASP:326:A	0.637	4	0.148, 0.915	5.4	e		151/152	E,A,T,L,Q,D,G,S		326	D	ASP:326:A	0.938	4	0.360, 1.189	5.3	e		102/103	E,G,A,S,D,T,L,Q
327	L	LEU:327:A	-0.616	8	-0.702, -0.577	9.8	b		150/150	L,I,V			327	L	LEU:327:A	-0.608	8	-0.775, -0.510	9.8	b		54/55	L,V		327	L	LEU:327:A	-0.697	8	-0.882, -0.591	9.8	b		151/152	L,R,V		327	L	LEU:327:A	-0.664	9	-0.807, -0.602	9.8	b	s	102/103	L,V
328	F	PHE:328:A	-0.449	8	-0.577, -0.364	8.7	e	f	150/150	F,E,V,N,Q,D			328	F	PHE:328:A	0.803	4	0.336, 1.150	5.3	e		54/55	A,G,S,M,F,L,I		328	F	PHE:328:A	0.457	4	0.026, 0.659	5.4	e		151/152	E,A,V,G,S,M,F,L,I		328	F	PHE:328:A	0.629	4	0.196, 0.827	5.4	e		102/103	A,G,S,M,F,L,I,E
329	E	GLU:329:A	1.322	3	0.613, 1.523	4.3	e		150/150	E,D,T,N,L,K			329	E	GLU:329:A	2.756	1	1.150, 3.313	3.1	e		54/55	S,R,D,Q,E,K,N,A,T,L		329	E	GLU:329:A	1.772	3	0.915, 1.809	4.3	e		151/152	D,N,E,A,S,R,Q,K,T,L		329	E	GLU:329:A	1.883	2	0.827, 1.768	4.3	e		102/103	S,R,D,Q,E,K,N,A,T,L
330	Y	TYR:330:A	0.425	4	0.026, 0.613	5.4	e		150/150	Y,F,W,H			330	Y	TYR:330:A	0.089	5	-0.257, 0.336	6.5	e		54/55	Y,F,H		330	Y	TYR:330:A	0.286	5	-0.081, 0.456	5.4	e		151/152	F,Y,W,H		330	Y	TYR:330:A	0.084	5	-0.247, 0.360	6.5	e		102/103	Y,F,H,W
331	T	THR:331:A	0.132	5	-0.098, 0.176	6.5	e		150/150	T,K,R,L,H,Q,V,M,S			331	T	THR:331:A	1.644	3	0.793, 1.720	4.3	e		54/55	K,Y,V,F,T,M,L,R		331	T	THR:331:A	1.074	4	0.456, 1.265	4.3	e		151/152	K,R,Y,V,F,T,M,L		331	T	THR:331:A	1.223	3	0.564, 1.768	4.3	e		102/103	K,Y,V,F,T,M,L,R
332	E	GLU:332:A	1.995	2	0.961, 3.130	4.1	e		150/150	E,T,L,D,I,N,S,M,K,V,F,W			332	E	GLU:332:A	2.458	2	1.150, 3.313	3.1	e		54/55	R,T,A,F,E,D,S,G,Q,I		332	E	GLU:332:A	1.607	3	0.915, 1.809	4.3	e		151/152	L,N,V,R,T,A,F,E,D,S,G,Q,I		332	E	GLU:332:A	1.585	3	0.827, 1.768	4.3	e		102/103	R,T,A,F,E,D,S,G,Q,I,N
333	E	GLU:333:A	1.449	3	0.961, 1.523	4.3	e		150/150	E,D,Q,S,A,T,N,K,H,G			333	E	GLU:333:A	0.623	4	0.174, 0.793	5.4	e		54/55	L,E,Q,H,N,D,T,A		333	E	GLU:333:A	0.147	5	-0.177, 0.289	6.5	e		151/152	Q,E,R,L,H,N,D,T,A		333	E	GLU:333:A	0.296	5	-0.058, 0.564	5.4	e		102/103	L,E,Q,H,N,D,T,A
334	K	LYS:334:A	1.370	3	0.613, 1.523	4.3	e		150/150	K,H,N,A,V,T,Q,R,S			334	K	LYS:334:A	-0.039	5	-0.332, 0.174	7.5	e		54/55	N,H,Q,K,T		334	K	LYS:334:A	-0.217	6	-0.476, -0.081	7.5	e		151/152	H,K,N,Q,T		334	K	LYS:334:A	0.015	5	-0.324, 0.196	7.5	e		102/103	N,H,Q,K,T
335	K	LYS:335:A	0.076	5	-0.201, 0.176	6.5	e		150/150	K,G,R,N,E			335	K	LYS:335:A	-0.037	5	-0.332, 0.174	7.5	e		54/55	N,K,Q,D,G,R		335	K	LYS:335:A	-0.111	5	-0.411, 0.148	7.5	e		151/152	G,N,K,Q,D,R		335	K	LYS:335:A	0.028	5	-0.324, 0.196	7.5	e		102/103	N,K,Q,D,G,R
336	T	THR:336:A	-0.335	7	-0.485, -0.288	8.7	e		150/150	T,S			336	T	THR:336:A	0.110	5	-0.257, 0.336	6.5	e		54/55	S,T		336	T	THR:336:A	-0.050	5	-0.341, 0.148	7.5	e		151/152	S,T		336	T	THR:336:A	-0.064	5	-0.324, 0.059	7.5	e		102/103	S,T
337	I	ILE:337:A	-0.298	7	-0.429, -0.201	7.6	b		150/150	I,V,L,C			337	I	ILE:337:A	0.126	5	-0.257, 0.336	6.5	b		54/55	I,V,L		337	I	ILE:337:A	0.042	5	-0.263, 0.289	6.5	b		151/152	I,V,L		337	I	ILE:337:A	0.043	5	-0.247, 0.196	6.5	b		102/103	I,V,L
338	K	LYS:338:A	0.650	4	0.176, 0.961	5.4	e		150/150	K,V,L,N,M,I,Q,T,S,R			338	K	LYS:338:A	-0.807	9	-0.861, -0.793	9.9	e	f	54/55	K		338	K	LYS:338:A	-0.472	7	-0.690, -0.341	8.7	e		151/152	L,V,M,K		338	K	LYS:338:A	-0.728	9	-0.840, -0.678	9.9	e	f	102/103	K,V
339	G	GLY:339:A	-0.502	8	-0.648, -0.429	9.7	e	f	150/150	G,N,D,T			339	G	GLY:339:A	-0.512	8	-0.753, -0.398	9.7	e	f	54/55	G,C		339	G	GLY:339:A	-0.744	8	-0.941, -0.642	9.8	e	f	151/152	G,C		339	G	GLY:339:A	-0.579	8	-0.787, -0.454	9.7	e	f	102/103	G,C
340	Y	TYR:340:A	-0.082	5	-0.288, 0.026	7.5	b		150/150	Y,F			340	Y	TYR:340:A	0.115	5	-0.257, 0.336	6.5	b		54/55	F,Y		340	Y	TYR:340:A	0.305	5	-0.081, 0.659	5.4	b		151/152	F,Y		340	Y	TYR:340:A	0.428	4	-0.058, 0.827	5.4	b		102/103	F,Y
341	P	PRO:341:A	-0.212	6	-0.429, -0.098	7.6	e		150/150	P,S,Q,A			341	P	PRO:341:A	0.520	4	0.041, 0.793	5.4	e		54/55	K,P,T,S,A		341	P	PRO:341:A	0.967	4	0.456, 1.265	4.3	e		151/152	P,Q,H,A,L,S,K,T		341	P	PRO:341:A	0.785	4	0.196, 1.189	5.3	e		102/103	K,P,T,S,A,Q,H
342	K	LYS:342:A	1.063	3	0.613, 1.523	4.3	e		150/150	K,G,H,N,D,M,S,E,Q,L			342	K	LYS:342:A	-0.326	7	-0.557, -0.171	8.6	e		54/55	G,K,N		342	K	LYS:342:A	-0.022	5	-0.341, 0.148	7.5	e		150/152	K,G,N,H,R,X		342	K	LYS:342:A	0.144	5	-0.159, 0.360	6.5	e		102/103	G,K,N,H
343	A	ALA:343:A	-0.500	8	-0.615, -0.429	8.7	b		150/150	A,G,S			343	A	ALA:343:A	-0.690	9	-0.809, -0.638	9.9	b	s	54/55	A,G		343	A	ALA:343:A	-0.907	9	-1.012, -0.849	9.9	b	s	151/152	A,G		343	A	ALA:343:A	-0.736	9	-0.840, -0.678	9.9	b	s	102/103	A,G
344	Q	GLN:344:A	1.577	3	0.961, 1.523	4.3	e		150/150	Q,K,I,M,E,T,S,R,P,N			344	Q	GLN:344:A	1.233	3	0.535, 1.720	4.3	e		54/55	K,T,N,S,E,Q		344	Q	GLN:344:A	1.331	3	0.659, 1.809	4.3	e		151/152	K,T,M,Q,R,N,S,E		344	Q	GLN:344:A	1.326	3	0.564, 1.768	4.3	e		102/103	K,T,N,S,E,Q,M
345	E	GLU:345:A	3.130	1	1.523, 3.130	3.1	e		150/150	E,P,A,I,K,T,V,S,L,R,N,Q			345	E	GLU:345:A	-0.484	8	-0.672, -0.398	9.7	e	f	54/55	E,A,Q		345	E	GLU:345:A	-0.279	6	-0.536, -0.081	7.5	e		151/152	P,I,A,E,Q		345	E	GLU:345:A	-0.320	7	-0.558, -0.159	8.6	e		102/103	E,A,Q,P
346	S	SER:346:A	-0.429	7	-0.577, -0.364	8.7	e		150/150	S,Y,R,L,F			346	S	SER:346:A	0.522	4	0.041, 0.793	5.4	e		54/55	T,F,K,A,S,R		346	S	SER:346:A	0.452	4	0.026, 0.659	5.4	e		151/152	Y,I,T,F,K,A,S,R		346	S	SER:346:A	0.545	4	0.059, 0.827	5.4	e		102/103	T,F,K,A,S,R,Y
347	K	LYS:347:A	3.105	1	1.523, 3.130	3.1	e		150/150	K,E,Q,T,D,A,S,L,R,N,V,M			347	K	LYS:347:A	1.769	3	0.793, 1.720	4.3	e		54/55	K,A,D,N,S,T,Q,E		347	K	LYS:347:A	0.948	4	0.456, 1.265	4.3	e		151/152	E,Q,K,A,D,N,S,T		347	K	LYS:347:A	1.442	3	0.827, 1.768	4.3	e		102/103	K,A,D,N,S,T,Q,E
348	E	GLU:348:A	1.079	3	0.613, 1.523	4.3	e		94/150	E,D,G,S,N,Q,T,A,P			348	E	GLU:348:A	0.144	5	-0.257, 0.336	6.5	e		54/55	E,G,T,D,Q		348	E	GLU:348:A	0.044	5	-0.341, 0.289	7.5	e		151/152	G,A,E,T,D,Q		348	E	GLU:348:A	-0.127	6	-0.393, 0.059	7.5	e		102/103	E,G,T,D,Q
349	D	ASP:349:A	1.161	3	0.613, 1.523	4.3	e		150/150	D,N,S,G,C,E,T,H			349	D	ASP:349:A	0.789	4	0.336, 1.150	5.3	e		54/55	D,S,N,E,G		349	D	ASP:349:A	0.530	4	0.148, 0.659	5.4	e		151/152	S,N,G,R,D,E		349	D	ASP:349:A	0.406	4	0.059, 0.564	5.4	e		102/103	D,S,N,E,G
350	L	LEU:350:A	-0.259	6	-0.429, -0.201	7.6	b		150/150	L,I,M			350	L	LEU:350:A	-0.271	6	-0.557, -0.073	8.5	b		54/55	L,M,I		350	L	LEU:350:A	-0.395	7	-0.642, -0.263	8.6	b		151/152	I,L,V,M		350	L	LEU:350:A	-0.373	7	-0.602, -0.247	8.6	b		102/103	L,M,I
351	L	LEU:351:A	-0.012	5	-0.201, 0.176	6.5	b		150/150	L,M,I			351	L	LEU:351:A	-0.609	8	-0.775, -0.510	9.8	b		54/55	L,M		351	L	LEU:351:A	-0.712	8	-0.912, -0.591	9.8	b		151/152	L,M		351	L	LEU:351:A	-0.549	8	-0.739, -0.454	9.7	b		102/103	L,M
352	V	VAL:352:A	1.429	3	0.961, 1.523	4.3	e		150/150	V,F,Y,E,T,L,C,H,A			352	V	VAL:352:A	2.672	1	1.150, 3.313	3.1	e		54/55	L,V,I,S,G,E,T,K,H,A		352	V	VAL:352:A	1.748	3	0.915, 1.809	4.3	e		151/152	E,Y,F,L,V,I,S,G,T,K,H,A		352	V	VAL:352:A	2.895	1	1.189, 3.381	3.1	e		102/103	L,V,I,S,G,E,T,K,H,A,Y,F
353	A	ALA:353:A	-0.416	7	-0.534, -0.364	8.7	e		150/150	A,E,H,T,Q,K,S			353	A	ALA:353:A	-0.317	7	-0.557, -0.171	8.6	e		54/55	H,E,A,G		353	A	ALA:353:A	-0.165	6	-0.411, 0.026	7.5	e		151/152	A,V,E,I,H,G		353	A	ALA:353:A	-0.436	7	-0.642, -0.324	8.7	e		102/103	H,E,A,G
354	E	GLU:354:A	3.040	1	1.523, 3.130	3.1	e		150/150	E,P,D,K,Q,N,H,A,T			354	E	GLU:354:A	0.595	4	0.174, 0.793	5.4	e		54/55	P,Q,E,K,D		354	E	GLU:354:A	0.897	4	0.456, 1.265	4.3	e		151/152	D,P,Q,K,E		354	E	GLU:354:A	1.070	4	0.564, 1.189	4.3	e		102/103	P,Q,E,K,D
355	T	THR:355:A	-0.672	9	-0.742, -0.615	9.8	b	s	150/150	T,C,V			355	T	THR:355:A	0.120	5	-0.332, 0.336	7.5	b		54/55	C,T,A		355	T	THR:355:A	-0.044	5	-0.411, 0.148	7.5	b		151/152	C,F,T,A		355	T	THR:355:A	0.176	5	-0.247, 0.360	6.5	b		102/103	C,T,A,F
356	D	ASP:356:A	-0.671	9	-0.742, -0.615	9.8	e	f	150/150	D,H,M			356	D	ASP:356:A	-0.531	8	-0.702, -0.398	9.7	e	f	54/55	D,E		356	D	ASP:356:A	-0.784	8	-0.941, -0.690	9.8	e	f	151/152	D,E		356	D	ASP:356:A	-0.603	8	-0.764, -0.509	9.8	e	f	102/103	D,E
357	I	ILE:357:A	-0.753	9	-0.791, -0.742	9.9	b	s	150/150	I,L,V			357	I	ILE:357:A	-0.704	9	-0.809, -0.638	9.9	b	s	54/55	I,V		357	I	ILE:357:A	-0.837	9	-0.967, -0.775	9.8	b	s	151/152	I,T,V		357	I	ILE:357:A	-0.748	9	-0.840, -0.710	9.9	b	s	102/103	I,V
358	L	LEU:358:A	-0.326	7	-0.485, -0.201	8.6	b		150/150	L,F,V			358	L	LEU:358:A	-0.780	9	-0.861, -0.753	9.9	b	s	54/55	L		358	L	LEU:358:A	-0.828	9	-0.991, -0.734	9.8	b	s	151/152	L,F		358	L	LEU:358:A	-0.663	9	-0.807, -0.602	9.8	b	s	102/103	L,F
359	M	MET:359:A	0.030	5	-0.201, 0.176	6.5	b		150/150	M,I,V,L			359	M	MET:359:A	-0.389	7	-0.600, -0.257	8.6	b		54/55	I,M,L		359	M	MET:359:A	-0.503	7	-0.690, -0.411	8.7	b		151/152	I,V,S,M,L		359	M	MET:359:A	-0.389	7	-0.602, -0.247	8.6	b		102/103	I,M,L,V
360	P	PRO:360:A	-0.617	8	-0.723, -0.534	9.8	b		150/150	P,L,K			360	P	PRO:360:A	-0.767	9	-0.857, -0.729	9.9	b	s	54/55	P		360	P	PRO:360:A	-0.477	7	-0.734, -0.341	8.7	b		151/152	P,L,T		360	P	PRO:360:A	-0.799	9	-0.882, -0.764	9.9	b	s	102/103	P
361	C	CYS:361:A	-0.664	9	-0.742, -0.615	9.8	b	s	149/150	C,A,X			361	C	CYS:361:A	-0.565	8	-0.775, -0.458	9.8	b		54/55	A,C		361	C	CYS:361:A	-0.856	9	-0.991, -0.775	9.8	b	s	151/152	A,C		361	C	CYS:361:A	-0.660	9	-0.807, -0.558	9.8	b	s	102/103	A,C
362	A	ALA:362:A	-0.769	9	-0.804, -0.758	9.9	e	f	150/150	A,S			362	A	ALA:362:A	-0.691	9	-0.809, -0.638	9.9	e	f	54/55	A,S		362	A	ALA:362:A	-0.908	9	-1.012, -0.849	9.9	e	f	151/152	A,S		362	A	ALA:362:A	-0.737	9	-0.840, -0.678	9.9	e	f	102/103	A,S
363	T	THR:363:A	1.155	3	0.613, 1.523	4.3	e		150/150	T,I,V,L,S,G,M,A,K,N,C			363	T	THR:363:A	-0.454	7	-0.638, -0.332	9.7	e		54/55	V,M,T		363	T	THR:363:A	0.390	4	0.026, 0.659	5.4	e		151/152	S,R,G,I,V,T,N,M		363	T	THR:363:A	-0.220	6	-0.454, -0.058	7.5	e		102/103	V,M,T,I
364	Q	GLN:364:A	-0.756	9	-0.799, -0.742	9.9	e	f	150/150	Q,E			364	Q	GLN:364:A	-0.618	8	-0.753, -0.557	9.8	e	f	54/55	E,Q,R		364	Q	GLN:364:A	-0.848	9	-0.967, -0.775	9.8	e	f	151/152	E,Q,R		364	Q	GLN:364:A	-0.672	9	-0.787, -0.602	9.8	e	f	102/103	E,Q,R
365	K	LYS:365:A	-0.384	7	-0.534, -0.288	8.7	e		150/150	K,Q,R			365	K	LYS:365:A	-0.693	9	-0.809, -0.638	9.9	e	f	55/55	K,M		365	K	LYS:365:A	-0.819	9	-0.967, -0.734	9.8	e	f	152/152	K,Q,M		365	K	LYS:365:A	-0.640	8	-0.787, -0.558	9.8	e	f	103/103	K,M,Q
366	V	VAL:366:A	-0.158	6	-0.364, -0.098	7.6	e		150/150	V,Q,A,I,T,C,S			366	V	VAL:366:A	-0.295	7	-0.557, -0.171	8.6	e		55/55	S,T,A,V		366	V	VAL:366:A	-0.349	7	-0.591, -0.177	8.6	e		152/152	Q,V,E,P,S,T,A		366	V	VAL:366:A	-0.415	7	-0.602, -0.324	8.7	e		103/103	S,T,A,V
367	I	ILE:367:A	-0.718	9	-0.771, -0.677	9.9	b	s	150/150	I,L			367	I	ILE:367:A	-0.558	8	-0.729, -0.458	9.8	b		55/55	I,L		367	I	ILE:367:A	-0.689	8	-0.882, -0.591	9.8	b		152/152	L,I		367	I	ILE:367:A	-0.632	8	-0.764, -0.558	9.8	b		103/103	I,L
368	T	THR:368:A	0.098	5	-0.098, 0.176	6.5	e		150/150	T,N,H,K,R,D			368	T	THR:368:A	-0.585	8	-0.729, -0.510	9.8	e	f	55/55	N,T		368	T	THR:368:A	-0.474	7	-0.690, -0.341	8.7	e		152/152	T,N		368	T	THR:368:A	-0.260	6	-0.509, -0.159	8.6	e		103/103	N,T
369	T	THR:369:A	0.906	4	0.365, 0.961	4.4	e		150/150	T,A,K,S,N,R,M,Q,G,V,L,I,E			369	T	THR:369:A	0.047	5	-0.257, 0.174	6.5	e		55/55	S,A,T,N,V,K		369	T	THR:369:A	0.123	5	-0.177, 0.289	6.5	e		152/152	K,S,A,N,T,V		369	T	THR:369:A	0.057	5	-0.247, 0.196	6.5	e		103/103	S,A,T,N,V,K
370	D	ASP:370:A	3.130	1	1.523, 3.130	3.1	e		150/150	D,S,N,E,Q,A,K,H,G,T,F,R,L			370	D	ASP:370:A	0.009	5	-0.332, 0.174	7.5	e		55/55	D,E		370	D	ASP:370:A	0.504	4	0.148, 0.659	5.4	e		152/152	S,E,D,C,F,V		370	D	ASP:370:A	0.149	5	-0.159, 0.360	6.5	e		103/103	D,E
371	N	ASN:371:A	-0.772	9	-0.804, -0.758	9.9	e	f	150/150	N,V			371	N	ASN:371:A	-0.819	9	-0.861, -0.809	9.9	e	f	55/55	N		371	N	ASN:371:A	-0.871	9	-0.991, -0.813	9.9	e	f	152/152	N,S		371	N	ASN:371:A	-0.846	9	-0.884, -0.840	9.9	e	f	103/103	N
372	A	ALA:372:A	-0.769	9	-0.804, -0.758	9.9	b	s	150/150	A,C			372	A	ALA:372:A	-0.691	9	-0.809, -0.638	9.9	b	s	55/55	A,G		372	A	ALA:372:A	-0.539	7	-0.734, -0.411	8.7	b		151/152	A,X,T,S,G		372	A	ALA:372:A	-0.737	9	-0.840, -0.678	9.9	b	s	103/103	A,G
373	K	LYS:373:A	1.067	3	0.613, 1.523	4.3	e		150/150	K,H,G,P,N,S,C,D,R,A,E			373	K	LYS:373:A	2.825	1	1.150, 3.313	3.1	e		55/55	A,K,Q,N,G,S,E,D		373	K	LYS:373:A	3.272	1	1.809, 3.287	3.1	e		152/152	P,S,N,G,H,L,A,K,Q,E,D		373	K	LYS:373:A	3.343	1	1.768, 3.381	3.1	e		103/103	A,K,Q,N,G,S,E,D,H
374	D	ASP:374:A	1.360	3	0.613, 1.523	4.3	e		150/150	D,K,R,L,N,H,Q,M			374	D	ASP:374:A	0.594	4	0.174, 0.793	5.4	e		55/55	K,N,S,D		374	D	ASP:374:A	1.021	4	0.456, 1.265	4.3	e		152/152	R,K,N,S,D		374	D	ASP:374:A	0.918	4	0.360, 1.189	5.3	e		103/103	K,N,S,D,R
375	I	ILE:375:A	0.081	5	-0.098, 0.176	6.5	b		150/150	I,V,L,F			375	I	ILE:375:A	-0.106	6	-0.398, 0.041	7.5	b		55/55	I,V		375	I	ILE:375:A	-0.082	5	-0.341, 0.148	7.5	b		152/152	V,I,L,A		375	I	ILE:375:A	-0.159	6	-0.393, 0.059	7.5	b		103/103	I,V,L
376	K	LYS:376:A	0.223	5	-0.098, 0.365	6.4	e		150/150	K,Q,N,R			376	K	LYS:376:A	-0.470	8	-0.672, -0.332	9.7	e	f	55/55	Q,K,R		376	K	LYS:376:A	-0.389	7	-0.642, -0.263	8.6	e		152/152	K,N,Q,R		376	K	LYS:376:A	-0.180	6	-0.454, -0.058	7.5	e		103/103	Q,K,R,N
377	A	ALA:377:A	-0.523	8	-0.615, -0.485	8.8	b		150/150	A,C,T			377	A	ALA:377:A	-0.807	9	-0.861, -0.793	9.9	b	s	55/55	A		377	A	ALA:377:A	-0.722	8	-0.882, -0.642	9.8	b		152/152	A,C,D,T		377	A	ALA:377:A	-0.737	9	-0.840, -0.678	9.9	b	s	103/103	A,C
378	K	LYS:378:A	-0.457	8	-0.577, -0.364	8.7	e	f	150/150	K,R			378	K	LYS:378:A	-0.807	9	-0.861, -0.793	9.9	e	f	55/55	K		378	K	LYS:378:A	-0.997	9	-1.059, -0.967	9.9	e	f	152/152	K		378	K	LYS:378:A	-0.836	9	-0.882, -0.825	9.9	e	f	103/103	K
379	L	LEU:379:A	-0.507	8	-0.615, -0.429	8.7	b		150/150	L,I,M,V			379	L	LEU:379:A	-0.115	6	-0.398, 0.041	7.5	b		55/55	I,M,L,F		379	L	LEU:379:A	-0.330	6	-0.591, -0.177	8.6	b		152/152	I,V,M,L,F		379	L	LEU:379:A	-0.284	7	-0.509, -0.159	8.6	b		103/103	I,M,L,F
380	I	ILE:380:A	-0.526	8	-0.615, -0.485	8.8	b		150/150	I,V,L			380	I	ILE:380:A	-0.700	9	-0.809, -0.638	9.9	b	s	55/55	I,L		380	I	ILE:380:A	-0.748	8	-0.912, -0.642	9.8	b		152/152	I,V,L		380	I	ILE:380:A	-0.746	9	-0.840, -0.710	9.9	b	s	103/103	I,L
381	L	LEU:381:A	-0.293	7	-0.429, -0.201	7.6	b		150/150	L,A,G,C,S			381	L	LEU:381:A	-0.620	8	-0.793, -0.510	9.8	b		55/55	A,L		381	L	LEU:381:A	-0.538	7	-0.775, -0.411	8.7	b		152/152	A,G,D,L		381	L	LEU:381:A	-0.561	8	-0.739, -0.454	9.7	b		103/103	A,L,G
382	E	GLU:382:A	-0.798	9	-0.814, -0.791	9.9	b	s	150/150	E			382	E	GLU:382:A	-0.812	9	-0.861, -0.793	9.9	b	s	55/55	E		382	E	GLU:382:A	-1.003	9	-1.059, -0.991	9.9	b	s	152/152	E		382	E	GLU:382:A	-0.840	9	-0.882, -0.825	9.9	b	s	103/103	E
383	G	GLY:383:A	-0.486	8	-0.615, -0.429	8.7	b		150/150	G,A			383	G	GLY:383:A	-0.750	9	-0.857, -0.702	9.9	b	s	55/55	G		383	G	GLY:383:A	-0.269	6	-0.591, -0.081	8.5	b		152/152	G,A,S,D		383	G	GLY:383:A	-0.620	8	-0.807, -0.509	9.8	b		103/103	G,A
384	A	ALA:384:A	-0.802	9	-0.815, -0.799	9.9	b	s	150/150	A			384	A	ALA:384:A	-0.807	9	-0.861, -0.793	9.9	b	s	55/55	A		384	A	ALA:384:A	-0.908	9	-1.012, -0.849	9.9	b	s	152/152	A,V		384	A	ALA:384:A	-0.835	9	-0.882, -0.825	9.9	b	s	103/103	A
385	N	ASN:385:A	-0.803	9	-0.815, -0.799	9.9	e	f	150/150	N			385	N	ASN:385:A	-0.819	9	-0.861, -0.809	9.9	e	f	55/55	N		385	N	ASN:385:A	-1.011	9	-1.059, -0.991	9.9	e	f	152/152	N		385	N	ASN:385:A	-0.846	9	-0.884, -0.840	9.9	e	f	103/103	N
386	G	GLY:386:A	-0.788	9	-0.814, -0.782	9.9	b	s	150/150	G			386	G	GLY:386:A	-0.750	9	-0.857, -0.702	9.9	b	s	55/55	G		386	G	GLY:386:A	-0.743	8	-0.941, -0.642	9.8	b		151/152	G,X,R		386	G	GLY:386:A	-0.783	9	-0.878, -0.739	9.9	b	s	103/103	G
387	P	PRO:387:A	-0.783	9	-0.814, -0.771	9.9	b	s	150/150	P			387	P	PRO:387:A	-0.767	9	-0.857, -0.729	9.9	b	s	55/55	P		387	P	PRO:387:A	-0.794	9	-0.967, -0.690	9.8	b	s	152/152	P,L		387	P	PRO:387:A	-0.799	9	-0.882, -0.764	9.9	b	s	103/103	P
388	T	THR:388:A	-0.397	7	-0.534, -0.364	8.7	b		150/150	T,I,L,V,C			388	T	THR:388:A	-0.465	8	-0.672, -0.332	9.7	b		55/55	T,S,V,I		388	T	THR:388:A	-0.549	7	-0.734, -0.411	8.7	b		152/152	T,I,K,S,V		388	T	THR:388:A	-0.542	8	-0.710, -0.454	9.7	b		103/103	T,S,V,I
389	T	THR:389:A	-0.804	9	-0.815, -0.799	9.9	b	s	150/150	T			389	T	THR:389:A	-0.809	9	-0.861, -0.793	9.9	b	s	55/55	T		389	T	THR:389:A	-0.999	9	-1.059, -0.967	9.9	b	s	152/152	T		389	T	THR:389:A	-0.837	9	-0.882, -0.825	9.9	b	s	103/103	T
390	P	PRO:390:A	-0.123	6	-0.364, 0.026	7.5	b		150/150	P,M,I,L,A,G			390	P	PRO:390:A	-0.767	9	-0.857, -0.729	9.9	b	s	55/55	P		390	P	PRO:390:A	-0.949	9	-1.059, -0.912	9.9	b	s	152/152	P		390	P	PRO:390:A	-0.799	9	-0.882, -0.764	9.9	b	s	103/103	P
391	S	SER:391:A	0.070	5	-0.201, 0.176	6.5	b		150/150	S,A,E,D,L,K,G			391	S	SER:391:A	-0.339	7	-0.557, -0.171	8.6	b		55/55	A,S		391	S	SER:391:A	-0.552	7	-0.734, -0.411	8.7	b		152/152	E,A,S		391	S	SER:391:A	-0.437	7	-0.642, -0.324	8.7	b		103/103	A,S
392	G	GLY:392:A	-0.665	9	-0.742, -0.615	9.8	b	s	150/150	G,A			392	G	GLY:392:A	-0.366	7	-0.600, -0.257	8.6	b		55/55	A,G		392	G	GLY:392:A	-0.475	7	-0.690, -0.341	8.7	b		152/152	A,T,G		392	G	GLY:392:A	-0.478	8	-0.678, -0.393	9.7	b		103/103	A,G
393	E	GLU:393:A	-0.579	8	-0.677, -0.534	9.8	b		150/150	E,D,Y,Q			393	E	GLU:393:A	-0.683	9	-0.809, -0.600	9.8	b	s	55/55	D,E		393	E	GLU:393:A	-0.797	9	-0.941, -0.734	9.8	b	s	152/152	D,G,E		393	E	GLU:393:A	-0.726	9	-0.840, -0.678	9.9	b	s	103/103	D,E
394	K	LYS:394:A	0.966	4	0.613, 0.961	4.4	e		150/150	K,T,A,Q,R,S,E,I,L,V,N			394	K	LYS:394:A	0.373	4	-0.073, 0.535	5.4	e		55/55	A,R,K,E,Q,I		394	K	LYS:394:A	0.254	5	-0.081, 0.456	5.4	e		152/152	K,R,Q,E,A,I		394	K	LYS:394:A	0.474	4	0.059, 0.827	5.4	e		103/103	A,R,K,E,Q,I
395	I	ILE:395:A	-0.352	7	-0.485, -0.288	8.7	e		150/150	I,V,H,L			395	I	ILE:395:A	-0.598	8	-0.753, -0.510	9.8	e	f	55/55	I,V		395	I	ILE:395:A	-0.683	8	-0.849, -0.591	9.8	e	f	152/152	I,V		395	I	ILE:395:A	-0.657	8	-0.787, -0.602	9.8	e	f	103/103	I,V
396	L	LEU:396:A	-0.652	9	-0.742, -0.615	9.8	b	s	150/150	L,F			396	L	LEU:396:A	-0.781	9	-0.861, -0.753	9.9	b	s	55/55	L		396	L	LEU:396:A	-0.429	7	-0.690, -0.263	8.6	b		152/152	F,L,R,S		396	L	LEU:396:A	-0.518	8	-0.710, -0.393	9.7	b		103/103	L,R
397	L	LEU:397:A	0.790	4	0.365, 0.961	4.4	e		150/150	L,I,V,Q,M,R,K,H			397	L	LEU:397:A	-0.107	6	-0.398, 0.041	7.5	e		55/55	Q,R,L,I		397	L	LEU:397:A	-0.216	6	-0.536, 0.026	7.5	e		152/152	L,I,Q,R		397	L	LEU:397:A	-0.251	6	-0.509, -0.058	8.5	e		103/103	Q,R,L,I
398	D	ASP:398:A	1.527	3	0.961, 1.523	4.3	e		150/150	D,Q,E,A,K,S,N,G			398	D	ASP:398:A	0.553	4	0.041, 0.793	5.4	e		55/55	S,E,D,K,G		398	D	ASP:398:A	1.041	4	0.456, 1.265	4.3	e		152/152	E,D,K,G,A,S		398	D	ASP:398:A	1.062	4	0.564, 1.189	4.3	e		103/103	S,E,D,K,G
399	K	LYS:399:A	0.581	4	0.176, 0.613	5.4	e		150/150	K,R,N,M,Q,A,S			399	K	LYS:399:A	-0.430	7	-0.638, -0.332	9.7	e		55/55	R,K,N		399	K	LYS:399:A	-0.390	7	-0.642, -0.263	8.6	e		152/152	R,K,G,N		399	K	LYS:399:A	-0.510	8	-0.678, -0.393	9.7	e	f	103/103	R,K,N
400	G	GLY:400:A	-0.086	5	-0.288, 0.026	7.5	e		150/150	G,N,K,D,S,E			400	G	GLY:400:A	0.668	4	0.174, 1.150	5.3	e		55/55	K,R,N,G		400	G	GLY:400:A	-0.045	5	-0.341, 0.148	7.5	e		152/152	N,K,R,G		400	G	GLY:400:A	0.412	4	-0.058, 0.564	5.4	e		103/103	K,R,N,G
401	V	VAL:401:A	0.513	4	0.176, 0.613	5.4	b		150/150	V,I,K,C,M,Q,R			401	V	VAL:401:A	-0.084	5	-0.398, 0.041	7.5	b		55/55	I,V,A		401	V	VAL:401:A	-0.410	7	-0.642, -0.263	8.6	b		150/152	I,V,A		401	V	VAL:401:A	-0.222	6	-0.454, -0.058	7.5	b		103/103	I,V,A
402	L	LEU:402:A	-0.302	7	-0.485, -0.201	8.6	b		150/150	L,M			402	L	LEU:402:A	-0.781	9	-0.861, -0.753	9.9	b	s	55/55	L		402	L	LEU:402:A	-0.363	7	-0.642, -0.177	8.6	b		152/152	M,L,V,I		402	L	LEU:402:A	-0.812	9	-0.882, -0.787	9.9	b	s	103/103	L
403	L	LEU:403:A	-0.333	7	-0.485, -0.288	8.7	b		150/150	L,V,I,A			403	L	LEU:403:A	0.168	5	-0.171, 0.336	6.5	b		55/55	V,I,L,M		403	L	LEU:403:A	-0.116	6	-0.411, 0.026	7.5	b		152/152	V,F,I,L,M		403	L	LEU:403:A	0.027	5	-0.247, 0.196	6.5	b		103/103	V,I,L,M
404	V	VAL:404:A	-0.471	8	-0.577, -0.429	8.7	b		150/150	V,I,L,F			404	V	VAL:404:A	-0.341	7	-0.557, -0.171	8.6	b		55/55	I,V,L		404	V	VAL:404:A	-0.476	7	-0.690, -0.341	8.7	b		152/152	I,V,L		404	V	VAL:404:A	-0.447	7	-0.642, -0.324	8.7	b		103/103	I,V,L
405	P	PRO:405:A	-0.783	9	-0.814, -0.771	9.9	b	s	150/150	P			405	P	PRO:405:A	-0.767	9	-0.857, -0.729	9.9	b	s	55/55	P		405	P	PRO:405:A	-0.637	8	-0.849, -0.476	9.7	b		152/152	P,L		405	P	PRO:405:A	-0.799	9	-0.882, -0.764	9.9	b	s	103/103	P
406	D	ASP:406:A	-0.799	9	-0.814, -0.791	9.9	b	s	150/150	D			406	D	ASP:406:A	-0.800	9	-0.861, -0.775	9.9	b	s	55/55	D		406	D	ASP:406:A	-0.989	9	-1.059, -0.967	9.9	b	s	152/152	D		406	D	ASP:406:A	-0.829	9	-0.882, -0.807	9.9	b	s	103/103	D
407	L	LEU:407:A	-0.298	7	-0.485, -0.201	8.6	b		150/150	L,M,I			407	L	LEU:407:A	-0.085	5	-0.398, 0.174	7.5	b		55/55	L,M,I,F		407	L	LEU:407:A	-0.158	6	-0.476, 0.026	7.5	b		152/152	L,V,M,I,F		407	L	LEU:407:A	-0.087	5	-0.393, 0.059	7.5	b		103/103	L,M,I,F
408	Y	TYR:408:A	-0.314	7	-0.485, -0.201	8.6	b		150/150	Y,F			408	Y	TYR:408:A	-0.096	6	-0.398, 0.174	7.5	b		55/55	Y,F		408	Y	TYR:408:A	-0.295	6	-0.591, -0.081	8.5	b		152/152	Y,D,F		408	Y	TYR:408:A	-0.224	6	-0.509, -0.058	8.5	b		103/103	Y,F
409	C	CYS:409:A	0.159	5	-0.098, 0.365	6.4	b		150/150	C,I,L,V			409	C	CYS:409:A	-0.748	9	-0.857, -0.702	9.9	b	s	55/55	C		409	C	CYS:409:A	-0.625	8	-0.849, -0.476	9.7	b		151/152	L,I,C		409	C	CYS:409:A	-0.586	8	-0.787, -0.454	9.7	b		103/103	C,I
410	N	ASN:410:A	-0.803	9	-0.815, -0.799	9.9	b	s	150/150	N			410	N	ASN:410:A	-0.819	9	-0.861, -0.809	9.9	b	s	55/55	N		410	N	ASN:410:A	-1.011	9	-1.059, -0.991	9.9	b	s	151/152	N		410	N	ASN:410:A	-0.846	9	-0.884, -0.840	9.9	b	s	103/103	N
411	A	ALA:411:A	-0.736	9	-0.782, -0.702	9.9	b	s	150/150	A,G,S			411	A	ALA:411:A	-0.807	9	-0.861, -0.793	9.9	b	s	55/55	A		411	A	ALA:411:A	-0.906	9	-1.012, -0.849	9.9	b	s	151/152	A,T,X		411	A	ALA:411:A	-0.835	9	-0.882, -0.825	9.9	b	s	103/103	A
412	G	GLY:412:A	-0.788	9	-0.814, -0.782	9.9	b	s	150/150	G			412	G	GLY:412:A	-0.750	9	-0.857, -0.702	9.9	b	s	55/55	G		412	G	GLY:412:A	-0.928	9	-1.047, -0.882	9.9	b	s	152/152	G		412	G	GLY:412:A	-0.783	9	-0.878, -0.739	9.9	b	s	103/103	G
413	G	GLY:413:A	-0.788	9	-0.814, -0.782	9.9	e	f	150/150	G			413	G	GLY:413:A	-0.750	9	-0.857, -0.702	9.9	e	f	55/55	G		413	G	GLY:413:A	-0.928	9	-1.047, -0.882	9.9	e	f	152/152	G		413	G	GLY:413:A	-0.783	9	-0.878, -0.739	9.9	e	f	103/103	G
414	V	VAL:414:A	-0.804	9	-0.815, -0.804	9.9	b	s	150/150	V			414	V	VAL:414:A	-0.439	7	-0.638, -0.332	9.7	b		55/55	V,A		414	V	VAL:414:A	-0.714	8	-0.882, -0.591	9.8	b		152/152	V,A		414	V	VAL:414:A	-0.523	8	-0.710, -0.393	9.7	b		103/103	V,A
415	T	THR:415:A	-0.774	9	-0.804, -0.758	9.9	b	s	150/150	T,V			415	T	THR:415:A	-0.809	9	-0.861, -0.793	9.9	b	s	55/55	T		415	T	THR:415:A	-0.911	9	-1.012, -0.849	9.9	b	s	150/152	T,I		415	T	THR:415:A	-0.837	9	-0.882, -0.825	9.9	b	s	103/103	T
416	V	VAL:416:A	-0.804	9	-0.815, -0.804	9.9	b	s	150/150	V			416	V	VAL:416:A	-0.686	9	-0.809, -0.638	9.9	b	s	55/55	A,V		416	V	VAL:416:A	-0.902	9	-1.012, -0.849	9.9	b	s	152/152	V,A		416	V	VAL:416:A	-0.731	9	-0.840, -0.678	9.9	b	s	103/103	A,V
417	S	SER:417:A	-0.805	9	-0.815, -0.804	9.9	b	s	150/150	S			417	S	SER:417:A	-0.817	9	-0.861, -0.809	9.9	b	s	55/55	S		417	S	SER:417:A	-0.935	9	-1.031, -0.882	9.9	b	s	152/152	S,L		417	S	SER:417:A	-0.844	9	-0.884, -0.825	9.9	b	s	103/103	S
418	Y	TYR:418:A	-0.403	7	-0.534, -0.288	8.7	e		150/150	Y,F			418	Y	TYR:418:A	-0.781	9	-0.861, -0.753	9.9	e	f	55/55	Y		418	Y	TYR:418:A	-0.827	9	-0.991, -0.734	9.8	e	f	152/152	Y,F		418	Y	TYR:418:A	-0.665	9	-0.807, -0.602	9.8	e	f	103/103	Y,F
419	F	PHE:419:A	-0.798	9	-0.814, -0.791	9.9	b	s	150/150	F			419	F	PHE:419:A	-0.779	9	-0.857, -0.753	9.9	b	s	55/55	F		419	F	PHE:419:A	-0.964	9	-1.059, -0.941	9.9	b	s	152/152	F		419	F	PHE:419:A	-0.811	9	-0.882, -0.787	9.9	b	s	103/103	F
420	E	GLU:420:A	-0.798	9	-0.814, -0.791	9.9	b	s	150/150	E			420	E	GLU:420:A	-0.812	9	-0.861, -0.793	9.9	b	s	55/55	E		420	E	GLU:420:A	-0.921	9	-1.012, -0.882	9.9	b	s	152/152	E,V		420	E	GLU:420:A	-0.750	9	-0.840, -0.710	9.9	b	s	103/103	E,V
421	Y	TYR:421:A	-0.706	9	-0.782, -0.677	9.9	b	s	150/150	Y,W			421	Y	TYR:421:A	-0.608	8	-0.775, -0.510	9.8	b		55/55	Y,F		421	Y	TYR:421:A	-0.639	8	-0.849, -0.476	9.7	b		152/152	W,Y,F		421	Y	TYR:421:A	-0.482	8	-0.710, -0.324	9.7	b		103/103	Y,F,W
422	L	LEU:422:A	-0.752	9	-0.799, -0.723	9.9	e	f	150/150	L,V			422	L	LEU:422:A	-0.781	9	-0.861, -0.753	9.9	e	f	55/55	L		422	L	LEU:422:A	-0.966	9	-1.059, -0.941	9.9	e	f	152/152	L		422	L	LEU:422:A	-0.812	9	-0.882, -0.787	9.9	e	f	103/103	L
423	K	LYS:423:A	-0.801	9	-0.814, -0.799	9.9	b	s	150/150	K			423	K	LYS:423:A	-0.692	9	-0.809, -0.638	9.9	b	s	55/55	K,T		423	K	LYS:423:A	-0.908	9	-1.012, -0.849	9.9	b	s	152/152	K,T		423	K	LYS:423:A	-0.737	9	-0.840, -0.678	9.9	b	s	103/103	K,T
424	N	ASN:424:A	-0.712	9	-0.771, -0.677	9.9	b	s	150/150	N,D			424	N	ASN:424:A	-0.819	9	-0.861, -0.809	9.9	b	s	55/55	N		424	N	ASN:424:A	-1.011	9	-1.059, -0.991	9.9	b	s	152/152	N		424	N	ASN:424:A	-0.846	9	-0.884, -0.840	9.9	b	s	103/103	N
425	I	ILE:425:A	-0.667	9	-0.742, -0.615	9.8	e	f	150/150	I,L			425	I	ILE:425:A	-0.594	8	-0.753, -0.510	9.8	e	f	55/55	I,L		425	I	ILE:425:A	-0.598	8	-0.775, -0.476	8.7	e	f	152/152	L,I		425	I	ILE:425:A	-0.536	8	-0.710, -0.454	9.7	e	f	103/103	I,L
426	N	ASN:426:A	-0.681	9	-0.742, -0.648	9.9	e	f	150/150	N,E,S,Q			426	N	ASN:426:A	-0.819	9	-0.861, -0.809	9.9	e	f	55/55	N		426	N	ASN:426:A	-1.011	9	-1.059, -0.991	9.9	e	f	152/152	N		426	N	ASN:426:A	-0.846	9	-0.884, -0.840	9.9	e	f	103/103	N
427	H	HIS:427:A	-0.769	9	-0.804, -0.758	9.9	e	f	150/150	H,D			427	H	HIS:427:A	-0.801	9	-0.861, -0.775	9.9	e	f	55/55	H		427	H	HIS:427:A	-0.990	9	-1.059, -0.967	9.9	e	f	152/152	H		427	H	HIS:427:A	-0.830	9	-0.882, -0.807	9.9	e	f	103/103	H
428	V	VAL:428:A	-0.722	9	-0.771, -0.702	9.9	e	f	150/150	V,T,S,I			428	V	VAL:428:A	-0.690	9	-0.809, -0.638	9.9	e	f	55/55	I,V		428	V	VAL:428:A	-0.803	9	-0.941, -0.734	9.8	e	f	152/152	V,D,I		428	V	VAL:428:A	-0.728	9	-0.840, -0.678	9.9	e	f	103/103	I,V
429	S	SER:429:A	-0.805	9	-0.815, -0.804	9.9	e	f	150/150	S			429	S	SER:429:A	-0.720	9	-0.823, -0.672	9.9	e	f	55/55	S,T		429	S	SER:429:A	-0.859	9	-0.967, -0.813	9.9	e	f	152/152	S,R,T		429	S	SER:429:A	-0.760	9	-0.853, -0.710	9.9	e	f	103/103	S,T
430	Y	TYR:430:A	-0.580	8	-0.677, -0.534	9.8	e	f	150/150	Y,F			430	Y	TYR:430:A	-0.439	7	-0.672, -0.332	9.7	e		55/55	F,Y		430	Y	TYR:430:A	-0.421	7	-0.690, -0.263	8.6	e		152/152	Y,F		430	Y	TYR:430:A	-0.507	8	-0.710, -0.393	9.7	e	f	103/103	F,Y
431	G	GLY:431:A	-0.788	9	-0.814, -0.782	9.9	e	f	150/150	G			431	G	GLY:431:A	-0.750	9	-0.857, -0.702	9.9	e	f	55/55	G		431	G	GLY:431:A	-0.928	9	-1.047, -0.882	9.9	e	f	152/152	G		431	G	GLY:431:A	-0.783	9	-0.878, -0.739	9.9	e	f	103/103	G
432	K	LYS:432:A	-0.759	9	-0.799, -0.742	9.9	e	f	150/150	K,R			432	K	LYS:432:A	-0.691	9	-0.809, -0.638	9.9	e	f	55/55	K,R		432	K	LYS:432:A	-0.509	7	-0.734, -0.341	8.7	e		152/152	R,H,K		432	K	LYS:432:A	-0.631	8	-0.764, -0.558	9.8	e	f	103/103	K,R
433	M	MET:433:A	-0.753	9	-0.799, -0.723	9.9	e	f	150/150	M,L			433	M	MET:433:A	-0.477	8	-0.672, -0.332	9.7	e	f	55/55	L,M		433	M	MET:433:A	-0.686	8	-0.849, -0.591	9.8	e	f	152/152	L,M		433	M	MET:433:A	-0.527	8	-0.710, -0.393	9.7	e	f	103/103	L,M
434	N	ASN:434:A	-0.679	9	-0.742, -0.648	9.9	e	f	150/150	N,T,L,S			434	N	ASN:434:A	0.177	5	-0.171, 0.336	6.5	e		55/55	S,N,H,T		434	N	ASN:434:A	0.113	5	-0.177, 0.289	6.5	e		152/152	T,I,S,N,H		434	N	ASN:434:A	0.076	5	-0.247, 0.196	6.5	e		103/103	S,N,H,T
435	S	SER:435:A	-0.753	9	-0.799, -0.723	9.9	b	s	150/150	S,F			435	S	SER:435:A	0.381	4	-0.073, 0.535	5.4	b		55/55	F,V,S,L,A,I,T		435	S	SER:435:A	0.249	5	-0.081, 0.456	5.4	b		152/152	F,I,V,S,L,A,T		435	S	SER:435:A	0.218	5	-0.159, 0.360	6.5	b		103/103	F,V,S,L,A,I,T
436	K	LYS:436:A	-0.764	9	-0.799, -0.742	9.9	e	f	150/150	K,R			436	K	LYS:436:A	-0.307	7	-0.557, -0.171	8.6	e		55/55	R,K,G		436	K	LYS:436:A	-0.518	7	-0.734, -0.411	8.7	e		152/152	K,R,G		436	K	LYS:436:A	-0.403	7	-0.602, -0.247	8.6	e		103/103	R,K,G
437	S	SER:437:A	-0.692	9	-0.771, -0.648	9.9	e	f	150/150	S,Y,W			437	S	SER:437:A	0.220	5	-0.171, 0.535	6.4	e		55/55	Q,H,R,T,S,I,K		437	S	SER:437:A	0.145	5	-0.177, 0.289	6.5	e		152/152	Y,Q,H,R,T,S,I,K		437	S	SER:437:A	0.230	5	-0.159, 0.360	6.5	e		103/103	Q,H,R,T,S,I,K,Y
438	T	THR:438:A	-0.671	9	-0.742, -0.615	9.8	e	f	150/150	T,E,D,Q			438	T	THR:438:A	-0.086	5	-0.398, 0.041	7.5	e		55/55	E,T,S,I,D		438	T	THR:438:A	-0.530	7	-0.734, -0.411	8.7	e		152/152	E,T,S,I,D		438	T	THR:438:A	-0.219	6	-0.454, -0.058	7.5	e		103/103	E,T,S,I,D
439	S	SER:439:A	-0.077	5	-0.288, 0.026	7.5	e		150/150	S,R,K,E			439	S	SER:439:A	0.133	5	-0.171, 0.336	6.5	e		55/55	S,A,K,N,Q		439	S	SER:439:A	0.058	5	-0.263, 0.289	6.5	e		152/152	R,T,W,S,A,K,N,Q		439	S	SER:439:A	0.112	5	-0.247, 0.360	6.5	e		103/103	S,A,K,N,Q,R
440	E	GLU:440:A	-0.083	5	-0.288, 0.026	7.5	e		150/150	E,D			440	E	GLU:440:A	0.559	4	0.174, 0.793	5.4	e		55/55	Q,H,S,A,E,T,N,L		440	E	GLU:440:A	0.489	4	0.148, 0.659	5.4	e		152/152	D,E,V,Q,H,S,A,T,N,L		440	E	GLU:440:A	0.417	4	0.059, 0.564	5.4	e		103/103	Q,H,S,A,E,T,N,L
441	L	LEU:441:A	-0.611	8	-0.702, -0.577	9.8	e	f	150/150	L,S,T,A,N			441	L	LEU:441:A	0.329	5	-0.073, 0.535	5.4	e		55/55	N,I,M,L,T,V		441	L	LEU:441:A	-0.180	6	-0.476, 0.026	7.5	e		152/152	S,N,I,M,L,T,V		441	L	LEU:441:A	0.154	5	-0.159, 0.360	6.5	e		103/103	N,I,M,L,T,V,S
442	I	ILE:442:A	-0.740	9	-0.782, -0.723	9.9	b	s	150/150	I,N,S			442	I	ILE:442:A	-0.567	8	-0.729, -0.458	9.8	b		55/55	L,I,V		442	I	ILE:442:A	-0.663	8	-0.849, -0.536	9.7	b		152/152	N,T,L,I,V		442	I	ILE:442:A	-0.530	8	-0.710, -0.454	9.7	b		103/103	L,I,V,N
443	I	ILE:443:A	0.109	5	-0.201, 0.176	6.5	e		150/150	I,Y,H,L,Q,T,K,R,E,F			443	I	ILE:443:A	1.001	4	0.336, 1.150	5.3	e		55/55	R,N,S,K,I,T,L,H,F		443	I	ILE:443:A	0.668	4	0.148, 0.915	5.4	e		152/152	Y,R,N,S,K,I,T,L,H,F		443	I	ILE:443:A	0.904	4	0.360, 1.189	5.3	e		103/103	R,N,S,K,I,T,L,H,F,Y
444	E	GLU:444:A	-0.167	6	-0.364, -0.098	7.6	e		150/150	E,H,Y,Q,F,S,A,M,D,G			444	E	GLU:444:A	-0.478	8	-0.672, -0.398	9.7	e	f	55/55	E,Q,G,A		444	E	GLU:444:A	-0.236	6	-0.476, -0.081	7.5	e		152/152	H,N,Q,R,E,G,A		444	E	GLU:444:A	-0.423	7	-0.642, -0.324	8.7	e		103/103	E,Q,G,A,H
445	L	LEU:445:A	-0.798	9	-0.814, -0.791	9.9	e	f	150/150	L			445	L	LEU:445:A	0.309	5	-0.073, 0.535	5.4	e		55/55	V,I,T,L,M		445	L	LEU:445:A	0.219	5	-0.177, 0.456	6.4	e		152/152	L,F,V,I,T,M		445	L	LEU:445:A	0.292	5	-0.058, 0.564	5.4	e		103/103	V,I,T,L,M
446	M	MET:446:A	-0.708	9	-0.771, -0.677	9.9	b	s	150/150	M,L,F			446	M	MET:446:A	1.542	3	0.793, 1.720	4.3	b		55/55	L,F,M,I,V,T		446	M	MET:446:A	0.871	4	0.289, 1.265	5.3	b		152/152	L,F,M,I,V,T		446	M	MET:446:A	1.221	3	0.564, 1.768	4.3	b		103/103	L,F,M,I,V,T
447	N	ASN:447:A	0.232	5	-0.098, 0.365	6.4	e		148/150	N,E,M,A,K,Q,D,X,G,T			447	N	ASN:447:A	0.036	5	-0.257, 0.174	6.5	e		55/55	K,R,A,T,S,N,D,E		447	N	ASN:447:A	0.308	5	-0.081, 0.456	5.4	e		151/152	M,E,A,V,R,L,K,T,S,N,D		447	N	ASN:447:A	0.094	5	-0.247, 0.360	6.5	e		102/103	K,R,A,T,S,N,D,E
448	S	SER:448:A	-0.805	9	-0.815, -0.804	9.9	e	f	149/150	S			448	S	SER:448:A	-0.723	9	-0.823, -0.672	9.9	e	f	55/55	S,T		448	S	SER:448:A	-0.936	9	-1.031, -0.882	9.9	e	f	151/152	S,T		448	S	SER:448:A	-0.764	9	-0.853, -0.710	9.9	e	f	102/103	S,T
449	I	ILE:449:A	-0.750	9	-0.791, -0.723	9.9	e	f	149/150	I,V			449	I	ILE:449:A	-0.360	7	-0.600, -0.257	8.6	e		55/55	V,I,L,M		449	I	ILE:449:A	-0.546	7	-0.734, -0.411	8.7	e		151/152	V,I,L,M		449	I	ILE:449:A	-0.343	7	-0.558, -0.247	8.6	e		102/103	V,I,L,M
450	N	ASN:450:A	-0.684	9	-0.742, -0.648	9.9	e	f	149/150	N,Q,E			450	N	ASN:450:A	-0.426	7	-0.600, -0.332	8.7	e		55/55	E,Q,N,G,S		450	N	ASN:450:A	-0.636	8	-0.813, -0.536	9.7	e	f	151/152	Q,P,E,N,G,S		450	N	ASN:450:A	-0.517	8	-0.678, -0.393	9.7	e	f	102/103	E,Q,N,G,S
451	E	GLU:451:A	0.282	5	0.026, 0.365	5.4	e		148/150	E,A,Q,D,N,X,S,K,G,R,H,T			451	E	GLU:451:A	0.358	5	-0.073, 0.535	5.4	e		55/55	E,D,S,Q,T,K,G		451	E	GLU:451:A	0.255	5	-0.081, 0.456	5.4	e		151/152	E,A,R,Q,D,S,T,K,G		451	E	GLU:451:A	0.598	4	0.196, 0.827	5.4	e		102/103	E,D,S,Q,T,K,G,A,R
452	S	SER:452:A	-0.805	9	-0.815, -0.804	9.9	e	f	148/150	S,X			452	S	SER:452:A	-0.315	7	-0.557, -0.171	8.6	e		55/55	S,C,G,A,D		452	S	SER:452:A	-0.629	8	-0.813, -0.536	9.7	e	f	151/152	S,C,G,A,D		452	S	SER:452:A	-0.422	7	-0.602, -0.324	8.7	e		102/103	S,C,G,A,D
453	L	LEU:453:A	-0.565	8	-0.677, -0.485	9.8	e	f	149/150	L,V,M,X,I			453	L	LEU:453:A	1.828	3	0.793, 1.720	4.3	e		55/55	L,N,D,M,F,E,V,G		453	L	LEU:453:A	0.906	4	0.289, 1.265	5.3	e		151/152	L,N,D,M,F,E,V,G		453	L	LEU:453:A	1.294	3	0.564, 1.768	4.3	e		102/103	L,N,D,M,F,E,V,G
454	H	HIS:454:A	-0.381	7	-0.534, -0.288	8.7	e		149/150	H,E,V,T,Q,Y,X,S			454	H	HIS:454:A	2.953	1	1.720, 3.313	3.1	e		55/55	K,R,D,A,N,H,Q,C,S,T,V,G		454	H	HIS:454:A	1.148	3	0.659, 1.265	4.3	e		151/152	E,Q,K,R,D,A,N,H,C,S,T,V,G		454	H	HIS:454:A	2.194	2	1.189, 3.381	3.1	e		102/103	K,R,D,A,N,H,Q,C,S,T,V,G,E
455	E	GLU:455:A	-0.019	5	-0.288, 0.026	7.5	e		149/150	E,R,N,Q,X,K,A,S,H,L			455	E	GLU:455:A	3.131	1	1.720, 3.313	3.1	e		55/55	E,S,N,K,G,D,Q,A,R,C,H		455	E	GLU:455:A	3.018	1	1.809, 3.287	3.1	e		150/152	R,S,K,A,G,E,N,D,Q,C,H		455	E	GLU:455:A	3.268	1	1.768, 3.381	3.1	e		101/103	E,S,N,K,G,D,Q,A,R,C,H
456	C	CYS:456:A	0.728	4	0.365, 0.961	4.4	e		147/150	C,R,N,K,S,T,A,E,Q,D,X			456	C	CYS:456:A	2.361	2	1.150, 3.313	3.1	e		52/55	A,K,C,E,Q,G,S,T,D		456	C	CYS:456:A	1.271	3	0.659, 1.809	4.3	e		148/152	K,R,T,M,A,C,E,Q,G,S,D		456	C	CYS:456:A	1.678	3	0.827, 1.768	4.3	e		99/103	A,K,C,E,Q,G,S,T,D,R
457	P	PRO:457:A	1.014	4	0.613, 0.961	4.4	e		145/150	P,V,H,G,D,Q,A,E,T,S,K,R,N,X,I,M,L,Y			457	P	PRO:457:A	3.241	1	1.720, 3.313	3.1	e		48/55	G,D,P,S,N,I,K,L,Q,A		457	P	PRO:457:A	3.014	1	1.809, 3.287	3.1	e		144/152	F,Y,V,G,D,P,S,N,I,K,L,Q,A		457	P	PRO:457:A	3.266	1	1.768, 3.381	3.1	e		95/103	G,D,P,S,N,I,K,L,Q,A,F
458	D	ASP:458:A	0.745	4	0.365, 0.961	4.4	e		142/150	D,G,F,K,T,A,S,N,X,Q,R,P,E			458	D	ASP:458:A	1.911	2	0.793, 3.313	4.1	e		45/55	V,K,D,G,S,E,C,I,X,L,P		458	D	ASP:458:A	1.628	3	0.915, 1.809	4.3	e		139/152	G,R,V,K,D,S,E,C,I,X,L,P		458	D	ASP:458:A	1.811	3	0.827, 1.768	4.3	e		90/103	V,K,D,G,S,E,C,I,X,L,P
459	S	SER:459:A	-0.032	5	-0.288, 0.176	7.5	e		144/150	S,G,N,E,X,K,D,L			459	S	SER:459:A	3.103	1	1.720, 3.313	3.1	e		19/55	G,A,E,S,I,Q,N,P,K,H,T		459	S	SER:459:A	1.439	3	0.659, 1.809	4.3	e		113/152	K,N,T,R,G,A,E,S,I,Q,P,H		459	S	SER:459:A	3.004	1	1.768, 3.381	3.1	e		64/103	G,A,E,S,I,Q,N,P,K,H,T,R
460	Q	GLN:460:A	2.673	1	0.961, 3.130	4.1	e		144/150	Q,R,K,T,G,P,N,A,D,S,X,I,V			460	Q	GLN:460:A	3.290	1	1.720, 3.313	3.1	e		26/55	E,P,K,S,G,D,N,Q,I,A,L		460	Q	GLN:460:A	2.799	1	1.265, 3.287	3.1	e		120/152	T,A,K,R,V,M,E,P,S,G,D,N,Q,I,L		460	Q	GLN:460:A	3.270	1	1.768, 3.381	3.1	e		71/103	E,P,K,S,G,D,N,Q,I,A,L,R
461	L	LEU:461:A	-0.580	8	-0.677, -0.534	9.8	e	f	149/150	L,I,V,X,A,F			461	L	LEU:461:A	2.680	1	1.150, 3.313	3.1	e		42/55	C,F,Y,L,I,V		461	L	LEU:461:A	1.794	3	0.915, 1.809	4.3	e		136/152	I,V,L,F,C,Y		461	L	LEU:461:A	1.980	2	0.827, 3.381	4.1	e		87/103	C,F,Y,L,I,V
462	P	PRO:462:A	0.002	5	-0.288, 0.176	7.5	e		149/150	P,Q,S,K,X,A,N,R,I			462	P	PRO:462:A	-0.500	8	-0.753, -0.398	9.7	e	f	42/55	V,P		462	P	PRO:462:A	-0.588	8	-0.849, -0.411	9.7	e	f	136/152	P,S,V		462	P	PRO:462:A	-0.583	8	-0.787, -0.454	9.7	e	f	87/103	V,P
463	N	ASN:463:A	-0.283	7*	-0.799, -0.098	9.6	e		1/150	N			463	N	ASN:463:A	2.321	2	1.150, 3.313	3.1	e		43/55	N,K,T,E,H,L,Q,D,P,C		463	N	ASN:463:A	2.568	1	1.265, 3.287	3.1	e		44/152	Q,N,K,T,E,H,L,D,P,C		463	N	ASN:463:A	2.232	2	1.189, 3.381	3.1	e		44/103	N,K,T,E,H,L,Q,D,P,C
464	I	ILE:464:A	0.113	5	-0.098, 0.176	6.5	e		150/150	I,V,M			464	I	ILE:464:A	0.325	5	-0.073, 0.535	5.4	e		55/55	L,V,I,F,K		464	I	ILE:464:A	0.503	4	0.148, 0.659	5.4	e		149/152	I,V,L,F,K		464	I	ILE:464:A	0.171	5	-0.159, 0.360	6.5	e		100/103	L,V,I,F,K
465	C	CYS:465:A	0.598	4	0.176, 0.613	5.4	e		150/150	C,T,V,E,I,L,M,H,K,Q,N,F			465	C	CYS:465:A	1.698	3	0.793, 1.720	4.3	e		54/55	K,L,S,T,A,C,I,E,N,V,X		465	C	CYS:465:A	1.221	3	0.659, 1.809	4.3	e		148/152	V,T,F,D,K,L,S,A,C,I,E,N,X		465	C	CYS:465:A	1.493	3	0.827, 1.768	4.3	e		99/103	K,L,S,T,A,C,I,E,N,V,X,F
466	P	PRO:466:A	-0.202	6	-0.429, -0.098	7.6	e		150/150	P,A,S			466	P	PRO:466:A	0.018	5	-0.332, 0.336	7.5	e		55/55	P,A		466	P	PRO:466:A	-0.021	5	-0.411, 0.148	7.5	e		149/152	P,S,H,A		466	P	PRO:466:A	-0.121	6	-0.454, 0.059	7.5	e		100/103	P,A,S
467	N	ASN:467:A	-0.562	8	-0.648, -0.534	9.8	e	f	150/150	N,S,T,F			467	N	ASN:467:A	-0.189	6	-0.458, -0.073	8.5	e		55/55	T,S,N		467	N	ASN:467:A	-0.324	6	-0.536, -0.177	7.6	e		149/152	T,S,D,N		467	N	ASN:467:A	-0.147	6	-0.393, 0.059	7.5	e		100/103	T,S,N,D
468	K	LYS:468:A	0.987	4	0.613, 0.961	4.4	e		150/150	K,E,A,S,Q,T,D,V,G,P,L			468	K	LYS:468:A	0.436	4	0.041, 0.793	5.4	e		55/55	E,D,K,V,A		468	K	LYS:468:A	0.244	5	-0.081, 0.456	5.4	e		149/152	A,E,V,D,K		468	K	LYS:468:A	0.311	5	-0.058, 0.564	5.4	e		100/103	E,D,K,V,A
469	K	LYS:469:A	1.393	3	0.961, 1.523	4.3	e		150/150	K,S,A,E,D,N,Q,P,R,G,Y,W			469	K	LYS:469:A	1.734	3	0.793, 1.720	4.3	e		55/55	A,E,Q,H,P,K,D,R,S,N,M		469	K	LYS:469:A	1.843	2	0.915, 1.809	4.3	e		149/152	E,A,S,R,D,G,Q,H,P,K,N,M		469	K	LYS:469:A	1.905	2	1.189, 1.768	3.3	e		100/103	A,E,Q,H,P,K,D,R,S,N,M
470	L	LEU:470:A	-0.664	9	-0.742, -0.615	9.8	e	f	150/150	L,F,Y			470	L	LEU:470:A	-0.781	9	-0.861, -0.753	9.9	e	f	55/55	L		470	L	LEU:470:A	-0.555	7	-0.775, -0.411	8.7	e		149/152	F,S,I,L		470	L	LEU:470:A	-0.511	8	-0.710, -0.393	9.7	e	f	100/103	L,F,S
471	K	LYS:471:A	0.303	5	0.026, 0.365	5.4	e		150/150	K,Q,S,N,A,E,D,L,F,R,Y			471	K	LYS:471:A	1.107	3	0.535, 1.720	4.3	e		55/55	K,E,R,N,T,Q,M,I		471	K	LYS:471:A	0.684	4	0.289, 0.915	5.4	e		149/152	Q,K,R,E,N,T,M,I		471	K	LYS:471:A	1.001	4	0.360, 1.189	5.3	e		100/103	K,E,R,N,T,Q,M,I
472	R	ARG:472:A	0.751	4	0.365, 0.961	4.4	e		149/150	R,K,D,Q,A,E,S,T,N			472	R	ARG:472:A	1.939	2	1.150, 1.720	3.3	e		55/55	H,L,R,K,Q,A,E,T,N,S,I		472	R	ARG:472:A	1.395	3	0.659, 1.809	4.3	e		149/152	D,K,N,H,L,R,Q,A,E,T,S,I		472	R	ARG:472:A	1.552	3	0.827, 1.768	4.3	e		100/103	H,L,R,K,Q,A,E,T,N,S,I
473	I	ILE:473:A	-0.191	6	-0.364, -0.098	7.6	e		149/150	I,R,K			473	I	ILE:473:A	0.192	5	-0.171, 0.336	6.5	e		55/55	Y,I,M,L,F		473	I	ILE:473:A	0.121	5	-0.263, 0.289	6.5	e		149/152	R,S,Y,I,M,L,F		473	I	ILE:473:A	0.185	5	-0.159, 0.360	6.5	e		100/103	Y,I,M,L,F,R
474	Q	GLN:474:A	-0.431	7	-0.534, -0.364	8.7	e		149/150	Q,I,V,M,L			474	Q	GLN:474:A	-0.216	6	-0.510, -0.073	8.5	e		55/55	L,F,R,Q		474	Q	GLN:474:A	-0.280	6	-0.536, -0.081	7.5	e		149/152	I,F,V,L,R,Q		474	Q	GLN:474:A	-0.095	6	-0.393, 0.059	7.5	e		100/103	L,F,R,Q,I
475	Q	GLN:475:A	0.654	4	0.365, 0.961	4.4	e		149/150	Q,S,A,H,G,M,K,D,L			475	Q	GLN:475:A	0.088	5	-0.257, 0.336	6.5	e		55/55	D,E,Q,N,S		475	Q	GLN:475:A	-0.078	5	-0.341, 0.148	7.5	e		149/152	S,L,D,E,Q,N		475	Q	GLN:475:A	0.039	5	-0.247, 0.196	6.5	e		100/103	D,E,Q,N,S
476	C	CYS:476:A	-0.643	9	-0.742, -0.577	9.8	e	f	150/150	C,G,A			476	C	CYS:476:A	0.109	5	-0.332, 0.336	7.5	e		53/55	S,H,C,N		476	C	CYS:476:A	0.137	5	-0.263, 0.456	6.4	e		145/152	G,D,S,H,C,N		476	C	CYS:476:A	0.184	5	-0.247, 0.360	6.5	e		97/103	S,H,C,N,G
477	T	THR:477:A	-0.768	9	-0.804, -0.758	9.9	e	f	150/150	T,A			477	T	THR:477:A	-0.067	5	-0.332, 0.174	7.5	e		55/55	A,T,S,H,N		477	T	THR:477:A	-0.390	7	-0.642, -0.263	8.6	e		148/152	A,T,S,H,N		477	T	THR:477:A	-0.199	6	-0.454, -0.058	7.5	e		100/103	A,T,S,H,N
478	T	THR:478:A	-0.754	9	-0.791, -0.742	9.9	e	f	150/150	T,S,N			478	T	THR:478:A	0.516	4	0.041, 0.793	5.4	e		55/55	S,K,R,T,H		478	T	THR:478:A	-0.061	5	-0.341, 0.148	7.5	e		148/152	S,K,R,T,H		478	T	THR:478:A	0.268	5	-0.058, 0.564	5.4	e		100/103	S,K,R,T,H
479	E	GLU:479:A	-0.798	9	-0.814, -0.791	9.9	b	s	150/150	E			479	E	GLU:479:A	-0.812	9	-0.861, -0.793	9.9	b	s	55/55	E		479	E	GLU:479:A	-0.835	9	-0.967, -0.775	9.8	b	s	148/152	E,K		479	E	GLU:479:A	-0.839	9	-0.882, -0.825	9.9	b	s	100/103	E
480	A	ALA:480:A	-0.685	9	-0.758, -0.648	9.9	e	f	150/150	A,K,V			480	A	ALA:480:A	-0.453	7	-0.638, -0.332	9.7	e		55/55	A,E,S,T		480	A	ALA:480:A	-0.429	7	-0.642, -0.263	8.6	e		150/152	K,E,A,S,T		480	A	ALA:480:A	-0.305	7	-0.558, -0.159	8.6	e		102/103	A,E,S,T,K
481	D	ASP:481:A	-0.799	9	-0.814, -0.791	9.9	e	f	150/150	D			481	D	ASP:481:A	-0.111	6	-0.398, 0.041	7.5	e		55/55	D,N,E,A,Q		481	D	ASP:481:A	-0.356	7	-0.591, -0.177	8.6	e		151/152	D,A,N,E,Q		481	D	ASP:481:A	-0.246	6	-0.509, -0.058	8.5	e		103/103	D,N,E,A,Q
482	I	ILE:482:A	-0.805	9	-0.815, -0.804	9.9	e	f	150/150	I			482	I	ILE:482:A	-0.702	9	-0.809, -0.638	9.9	e	f	55/55	V,I		482	I	ILE:482:A	-0.556	7	-0.734, -0.411	8.7	e		151/152	I,H,L,V		482	I	ILE:482:A	-0.641	8	-0.787, -0.558	9.8	e	f	103/103	V,I,H
483	V	VAL:483:A	-0.777	9	-0.804, -0.758	9.9	b	s	150/150	V,C			483	V	VAL:483:A	-0.565	8	-0.729, -0.458	9.8	b		55/55	V,I		483	V	VAL:483:A	-0.481	7	-0.690, -0.341	8.7	b		151/152	V,S,I,M		483	V	VAL:483:A	-0.508	8	-0.678, -0.393	9.7	b		103/103	V,I,S
484	D	ASP:484:A	-0.664	9	-0.742, -0.615	9.8	b	s	150/150	D,H,L,Y,N			484	D	ASP:484:A	-0.394	7	-0.600, -0.257	8.6	b		55/55	A,S,T,D		484	D	ASP:484:A	-0.014	5	-0.341, 0.148	7.5	b		151/152	H,R,Y,A,S,T,D		484	D	ASP:484:A	-0.228	6	-0.509, -0.058	8.5	b		103/103	A,S,T,D,H,R
485	S	SER:485:A	-0.805	9	-0.815, -0.804	9.9	e	f	150/150	S			485	S	SER:485:A	0.309	5	-0.073, 0.535	5.4	e		55/55	S,A,Y,F		485	S	SER:485:A	-0.042	5	-0.341, 0.148	7.5	e		151/152	S,H,P,A,Y,F		485	S	SER:485:A	0.304	5	-0.058, 0.564	5.4	e		103/103	S,A,Y,F,H,P
486	A	ALA:486:A	-0.720	9	-0.791, -0.677	9.9	e	f	150/150	A,G			486	A	ALA:486:A	-0.461	8	-0.672, -0.332	9.7	e	f	55/55	G,A		486	A	ALA:486:A	-0.078	5	-0.411, 0.148	7.5	e		151/152	G,C,A,S,V		486	A	ALA:486:A	-0.513	8	-0.710, -0.393	9.7	e	f	103/103	G,A
487	L	LEU:487:A	-0.798	9	-0.814, -0.791	9.9	b	s	150/150	L			487	L	LEU:487:A	-0.781	9	-0.861, -0.753	9.9	b	s	55/55	L		487	L	LEU:487:A	-0.833	9	-0.991, -0.734	9.8	b	s	151/152	L,F		487	L	LEU:487:A	-0.812	9	-0.882, -0.787	9.9	b	s	103/103	L
488	Q	GLN:488:A	-0.058	5	-0.288, 0.026	7.5	e		150/150	Q,D,A,E,N,S,W			488	Q	GLN:488:A	-0.717	9	-0.823, -0.672	9.9	e	f	55/55	K,Q		488	Q	GLN:488:A	-0.472	7	-0.690, -0.341	8.7	e		151/152	A,D,V,K,Q		488	Q	GLN:488:A	-0.554	8	-0.710, -0.454	9.7	e	f	103/103	K,Q,D,A
489	T	THR:489:A	-0.179	6	-0.364, -0.098	7.6	e		150/150	T,Y,F,Q,H			489	T	THR:489:A	-0.536	8	-0.729, -0.458	9.8	e	f	55/55	F,T,Y		489	T	THR:489:A	-0.191	6	-0.476, 0.026	7.5	e		151/152	Y,R,D,P,C,F,T		489	T	THR:489:A	-0.366	7	-0.602, -0.247	8.6	e		103/103	F,T,Y,R
490	V	VAL:490:A	-0.471	8	-0.577, -0.429	8.7	e	f	150/150	V,T,S,P,A			490	V	VAL:490:A	-0.686	9	-0.809, -0.638	9.9	e	f	55/55	V,I		490	V	VAL:490:A	-0.627	8	-0.813, -0.536	9.7	e	f	151/152	T,S,A,V,I		490	V	VAL:490:A	-0.523	8	-0.710, -0.393	9.7	e	f	103/103	V,I,T,S
491	M	MET:491:A	-0.806	9	-0.815, -0.804	9.9	b	s	150/150	M			491	M	MET:491:A	-0.482	8	-0.672, -0.398	9.7	b		55/55	L,M		491	M	MET:491:A	-0.588	8	-0.775, -0.476	8.7	b		151/152	M,E,T,L		491	M	MET:491:A	-0.465	7	-0.642, -0.324	8.7	b		103/103	L,M,E
492	E	GLU:492:A	-0.626	8	-0.723, -0.577	9.8	e	f	150/150	E,D,T,Q,G			492	E	GLU:492:A	-0.812	9	-0.861, -0.793	9.9	e	f	55/55	E		492	E	GLU:492:A	-0.921	9	-1.012, -0.882	9.9	e	f	151/152	E,A		492	E	GLU:492:A	-0.750	9	-0.840, -0.710	9.9	e	f	103/103	E,A
493	S	SER:493:A	-0.457	8	-0.577, -0.364	8.7	e	f	150/150	S,R,K,H			493	S	SER:493:A	0.368	5	-0.073, 0.535	5.4	e		55/55	T,S,A,F,M		493	S	SER:493:A	0.640	4	0.148, 0.915	5.4	e		151/152	R,H,P,Y,S,C,T,A,F,M		493	S	SER:493:A	0.355	5	-0.058, 0.564	5.4	e		103/103	T,S,A,F,M,R
494	A	ALA:494:A	-0.674	9	-0.742, -0.648	9.9	b	s	150/150	A,S,T			494	A	ALA:494:A	-0.232	6	-0.510, -0.073	8.5	b		55/55	A,S,T		494	A	ALA:494:A	-0.423	7	-0.642, -0.263	8.6	b		151/152	S,P,A,T		494	A	ALA:494:A	-0.285	7	-0.509, -0.159	8.6	b		103/103	A,S,T
495	A	ALA:495:A	-0.597	8	-0.677, -0.534	9.8	b		150/150	A,S,G			495	A	ALA:495:A	0.258	5	-0.171, 0.535	6.4	b		55/55	G,A,V		495	A	ALA:495:A	0.293	5	-0.081, 0.456	5.4	b		151/152	A,R,T,G,V		495	A	ALA:495:A	0.242	5	-0.159, 0.564	6.4	b		103/103	G,A,V,R
496	R	ARG:496:A	0.067	5	-0.201, 0.176	6.5	e		150/150	R,K,Q,E,H,V,T,N			496	R	ARG:496:A	3.147	1	1.720, 3.313	3.1	e		55/55	H,Q,K,E,L,R,I,A,T		496	R	ARG:496:A	2.280	2	1.265, 3.287	3.1	e		151/152	R,S,K,Q,H,E,L,I,A,T		496	R	ARG:496:A	2.812	1	1.189, 3.381	3.1	e		103/103	H,Q,K,E,L,R,I,A,T,S
497	G	GLY:497:A	-0.263	6	-0.429, -0.201	7.6	b		150/150	G,A,Q,N,R,S			497	G	GLY:497:A	-0.750	9	-0.857, -0.702	9.9	b	s	55/55	G		497	G	GLY:497:A	-0.448	7	-0.690, -0.263	8.6	b		150/152	Q,V,A,K,G		497	G	GLY:497:A	-0.432	7	-0.678, -0.247	9.6	b		101/103	G,A,K
498	I	ILE:498:A	-0.700	9	-0.758, -0.677	9.9	b	s	150/150	I,L,V,M			498	I	ILE:498:A	-0.705	9	-0.809, -0.638	9.9	b	s	55/55	I,V		498	I	ILE:498:A	-0.657	8	-0.813, -0.536	9.7	b		150/152	I,R,V		498	I	ILE:498:A	-0.558	8	-0.710, -0.454	9.7	b		101/103	I,V,R
499	K	LYS:499:A	-0.572	8	-0.648, -0.534	9.8	e	f	150/150	K,M,I,A			499	K	LYS:499:A	-0.694	9	-0.809, -0.638	9.9	e	f	55/55	M,K		499	K	LYS:499:A	-0.657	8	-0.813, -0.536	9.7	e	f	150/152	M,P,I,K		499	K	LYS:499:A	-0.643	8	-0.787, -0.558	9.8	e	f	101/103	M,K,P
500	E	GLU:500:A	0.984	4	0.613, 0.961	4.4	e		150/150	E,K,R,I,Q,S,N,L,D,H,A,T			500	E	GLU:500:A	1.344	3	0.793, 1.720	4.3	e		55/55	T,K,N,Y,Q,E,H,S,A,I		500	E	GLU:500:A	2.942	1	1.809, 3.287	3.1	e		150/152	R,H,K,V,T,C,D,G,N,Y,Q,E,S,A,I		500	E	GLU:500:A	1.354	3	0.827, 1.768	4.3	e		101/103	T,K,N,Y,Q,E,H,S,A,I,V
501	M	MET:501:A	-0.393	7	-0.534, -0.288	8.7	b		150/150	M,T,K,I,A,V,S,N			501	M	MET:501:A	0.579	4	0.174, 0.793	5.4	b		55/55	V,I,M,T,A		501	M	MET:501:A	0.432	4	0.026, 0.659	5.4	b		150/152	T,P,M,V,I,A		501	M	MET:501:A	0.459	4	0.059, 0.827	5.4	b		101/103	V,I,M,T,A,P
502	A	ALA:502:A	-0.461	8	-0.577, -0.364	8.7	b		150/150	A,S,G,V,T			502	A	ALA:502:A	-0.570	8	-0.729, -0.458	9.8	b		55/55	A,S,C		502	A	ALA:502:A	-0.518	7	-0.734, -0.411	8.7	b		152/152	A,H,S,V,C		502	A	ALA:502:A	-0.533	8	-0.710, -0.454	9.7	b		103/103	A,S,C
503	H	HIS:503:A	0.652	4	0.365, 0.961	4.4	e		149/150	H,M,T,K,Q,N,A,S,I,E,V,L,D,R			503	H	HIS:503:A	0.617	4	0.174, 0.793	5.4	e		55/55	N,A,T,S,H,L,E,I		503	H	HIS:503:A	0.666	4	0.289, 0.915	5.4	e		151/152	M,I,V,R,K,N,A,T,S,H,L,E		503	H	HIS:503:A	0.544	4	0.196, 0.827	5.4	e		102/103	N,A,T,S,H,L,E,I,M
504	K	LYS:504:A	0.530	4	0.176, 0.613	5.4	e		149/150	K,R,T,I,Q,E,N,A,S,D			504	K	LYS:504:A	-0.256	6	-0.510, -0.073	8.5	e		55/55	Q,E,K,R		504	K	LYS:504:A	-0.046	5	-0.341, 0.148	7.5	e		151/152	K,C,R,Q,E		504	K	LYS:504:A	-0.026	5	-0.324, 0.196	7.5	e		102/103	Q,E,K,R
505	F	PHE:505:A	0.093	5	-0.201, 0.176	6.5	e		149/150	F,Y,H,M,L			505	F	PHE:505:A	0.493	4	0.041, 0.793	5.4	e		55/55	Y,H,N,F		505	F	PHE:505:A	0.539	4	0.026, 0.915	5.4	e		151/152	Y,W,H,C,N,F		505	F	PHE:505:A	0.395	4	-0.058, 0.564	5.4	e		102/103	Y,H,N,F
506	E	GLU:506:A	-0.271	7	-0.429, -0.201	7.6	e		149/150	E,N,D,Q,G,K,R			506	E	GLU:506:A	0.755	4	0.336, 1.150	5.3	e		55/55	Q,K,H,A,V,E,N,G,S		506	E	GLU:506:A	0.066	5	-0.263, 0.289	6.5	e		151/152	N,K,Q,H,A,V,E,G,S		506	E	GLU:506:A	0.407	4	0.059, 0.564	5.4	e		102/103	Q,K,H,A,V,E,N,G,S
507	L	LEU:507:A	-0.706	9	-0.771, -0.677	9.9	b	s	149/150	L,T,M			507	L	LEU:507:A	-0.264	6	-0.557, -0.073	8.5	b		55/55	L,I,T		507	L	LEU:507:A	-0.421	7	-0.690, -0.263	8.6	b		151/152	L,R,I,T		507	L	LEU:507:A	-0.207	6	-0.509, -0.058	8.5	b		102/103	L,I,T,R
508	C	CYS:508:A	-0.715	9	-0.782, -0.677	9.9	e	f	149/150	C,G			508	C	CYS:508:A	-0.020	5	-0.398, 0.174	7.5	e		55/55	C,T,Q,R		508	C	CYS:508:A	0.630	4	0.148, 0.915	5.4	e		151/152	G,S,R,C,T,Q		508	C	CYS:508:A	0.535	4	0.059, 0.827	5.4	e		102/103	C,T,Q,R,G,S
509	N	ASN:509:A	-0.383	7	-0.534, -0.288	8.7	e		149/150	N,L,I,M,F			509	N	ASN:509:A	-0.587	8	-0.729, -0.510	9.8	e	f	55/55	L,N,K		509	N	ASN:509:A	-0.504	7	-0.734, -0.341	8.7	e		151/152	L,M,S,N,K		509	N	ASN:509:A	-0.635	8	-0.764, -0.558	9.8	e	f	102/103	L,N,K
510	D	ASP:510:A	-0.716	9	-0.771, -0.677	9.9	b	s	149/150	D,N			510	D	ASP:510:A	-0.800	9	-0.861, -0.775	9.9	b	s	55/55	D		510	D	ASP:510:A	-0.887	9	-1.012, -0.813	9.9	b	s	151/152	D,E		510	D	ASP:510:A	-0.829	9	-0.882, -0.807	9.9	b	s	102/103	D
511	L	LEU:511:A	-0.113	6	-0.288, 0.026	7.5	b		149/150	L,I,M			511	L	LEU:511:A	0.101	5	-0.257, 0.336	6.5	b		55/55	V,L,I		511	L	LEU:511:A	0.118	5	-0.263, 0.289	6.5	b		151/152	L,S,P,I,V		511	L	LEU:511:A	-0.074	5	-0.393, 0.196	7.5	b		102/103	V,L,I
512	R	ARG:512:A	-0.799	9	-0.814, -0.799	9.9	b	s	149/150	R			512	R	ARG:512:A	-0.800	9	-0.861, -0.775	9.9	b	s	55/55	R		512	R	ARG:512:A	-0.885	9	-1.012, -0.813	9.9	b	s	152/152	R,M		512	R	ARG:512:A	-0.829	9	-0.882, -0.807	9.9	b	s	103/103	R
513	R	ARG:513:A	-0.586	8	-0.677, -0.534	9.8	e	f	149/150	R,T,S,L			513	R	ARG:513:A	-0.216	6	-0.458, -0.073	8.5	e		55/55	T,K,R,Q		513	R	ARG:513:A	0.122	5	-0.177, 0.289	6.5	e		152/152	T,F,S,M,I,K,R,Q		513	R	ARG:513:A	-0.227	6	-0.454, -0.058	7.5	e		103/103	T,K,R,Q,S
514	A	ALA:514:A	-0.736	9	-0.782, -0.702	9.9	b	s	149/150	A,S			514	A	ALA:514:A	-0.807	9	-0.861, -0.793	9.9	b	s	55/55	A		514	A	ALA:514:A	-0.813	9	-0.941, -0.734	9.8	b	s	152/152	A,G,D		514	A	ALA:514:A	-0.835	9	-0.882, -0.825	9.9	b	s	103/103	A
515	A	ALA:515:A	-0.702	9	-0.758, -0.677	9.9	b	s	149/150	A,G,S			515	A	ALA:515:A	-0.573	8	-0.729, -0.458	9.8	b		55/55	A,T		515	A	ALA:515:A	-0.632	8	-0.813, -0.536	9.7	b		152/152	A,G,S,T		515	A	ALA:515:A	-0.536	8	-0.710, -0.454	9.7	b		103/103	A,T,S
516	Y	TYR:516:A	-0.441	7	-0.577, -0.364	8.7	b		148/150	Y,F			516	Y	TYR:516:A	-0.463	8	-0.672, -0.332	9.7	b		55/55	Y,F,N		516	Y	TYR:516:A	-0.578	8	-0.813, -0.411	9.7	b		152/152	Y,P,F,N		516	Y	TYR:516:A	-0.389	7	-0.642, -0.247	8.6	b		103/103	Y,F,N,P
517	V	VAL:517:A	-0.085	5	-0.288, 0.026	7.5	b		148/150	V,I,A,L,M			517	V	VAL:517:A	-0.484	8	-0.672, -0.398	9.7	b		55/55	I,V		517	V	VAL:517:A	0.019	5	-0.263, 0.148	6.5	b		152/152	V,L,I,A		517	V	VAL:517:A	-0.147	6	-0.393, 0.059	7.5	b		103/103	I,V
518	W	TRP:518:A	-0.388	7	-0.534, -0.288	8.7	e		148/150	W,N,T,S,H,V,G,C			518	W	TRP:518:A	1.143	3	0.535, 1.720	4.3	e		55/55	W,Y,H,F		518	W	TRP:518:A	0.644	4	0.148, 0.915	5.4	e		152/152	N,A,T,W,Y,H,F		518	W	TRP:518:A	1.069	4	0.360, 1.189	5.3	e		103/103	W,Y,H,F,N,T
519	S	SER:519:A	-0.273	7	-0.429, -0.201	7.6	b		148/150	S,A			519	S	SER:519:A	-0.529	8	-0.702, -0.458	9.8	b		55/55	S,T,A		519	S	SER:519:A	-0.604	8	-0.775, -0.476	8.7	b		152/152	A,S,T		519	S	SER:519:A	-0.599	8	-0.739, -0.509	9.8	b		103/103	S,T,A
520	S	SER:520:A	-0.427	7	-0.534, -0.364	8.7	b		148/150	S,I,V,L			520	S	SER:520:A	0.274	5	-0.073, 0.535	5.4	b		55/55	V,I,T,S,A		520	S	SER:520:A	0.031	5	-0.263, 0.289	6.5	b		152/152	I,L,C,V,T,S,A		520	S	SER:520:A	0.129	5	-0.159, 0.360	6.5	b		103/103	V,I,T,S,A,C
521	F	PHE:521:A	-0.297	7	-0.485, -0.201	8.6	b		148/150	F,E,V,T,Q,K,S,N			521	F	PHE:521:A	1.819	3	0.793, 1.720	4.3	b		55/55	E,D,S,L,F,Y,N,Q,K,R		521	F	PHE:521:A	0.969	4	0.456, 1.265	4.3	b		152/152	E,A,T,G,D,S,L,F,Y,N,Q,K,R		521	F	PHE:521:A	1.495	3	0.827, 1.768	4.3	b		103/103	E,D,S,L,F,Y,N,Q,K,R,T,G
522	K	LYS:522:A	-0.801	9	-0.814, -0.799	9.9	e	f	148/150	K			522	K	LYS:522:A	-0.807	9	-0.861, -0.793	9.9	e	f	55/55	K		522	K	LYS:522:A	-0.815	9	-0.941, -0.734	9.8	e	f	152/152	K,A,P		522	K	LYS:522:A	-0.736	9	-0.840, -0.678	9.9	e	f	103/103	K,P
523	I	ILE:523:A	-0.614	8	-0.702, -0.577	9.8	b		148/150	I,V			523	I	ILE:523:A	-0.598	8	-0.753, -0.510	9.8	b		55/55	I,V,F		523	I	ILE:523:A	-0.169	6	-0.411, 0.026	7.5	b		152/152	V,S,I,D,A,F		523	I	ILE:523:A	-0.549	8	-0.710, -0.454	9.7	b		103/103	I,V,F,D
524	F	PHE:524:A	-0.185	6	-0.364, -0.098	7.6	b		148/150	F,Y,V,I			524	F	PHE:524:A	-0.779	9	-0.857, -0.753	9.9	b	s	55/55	F		524	F	PHE:524:A	-0.549	7	-0.775, -0.411	8.7	b		152/152	F,S,W,C		524	F	PHE:524:A	-0.661	9	-0.807, -0.558	9.8	b	s	103/103	F,W
525	Q	GLN:525:A	1.518	3	0.961, 1.523	4.3	e		148/150	Q,T,K,A,I,N,S,H,L,E,V,R,G,D			525	Q	GLN:525:A	0.655	4	0.174, 0.793	5.4	e		55/55	K,L,R,N,Q,H,E,S		525	Q	GLN:525:A	0.999	4	0.456, 1.265	4.3	e		152/152	K,R,A,Q,T,E,L,N,H,S		525	Q	GLN:525:A	0.865	4	0.360, 1.189	5.3	e		103/103	K,L,R,N,Q,H,E,S,T
526	A	ALA:526:A	-0.579	8	-0.677, -0.534	9.8	e	f	147/150	A,T,V,N,I,S			526	A	ALA:526:A	-0.183	6	-0.458, 0.041	8.5	e		55/55	A,S,T,V,G		526	A	ALA:526:A	-0.119	6	-0.411, 0.026	7.5	e		151/152	V,A,T,L,S,G		526	A	ALA:526:A	-0.201	6	-0.454, -0.058	7.5	e		103/103	A,S,T,V,G
527	M	MET:527:A	-0.406	7	-0.577, -0.288	8.7	b		147/150	M,Y,H,Q,T,L			527	M	MET:527:A	0.536	4	0.041, 0.793	5.4	b		55/55	Y,L,M,V,I		527	M	MET:527:A	0.377	4	-0.081, 0.659	5.4	b		150/152	Y,P,R,L,M,V,I		527	M	MET:527:A	0.491	4	0.059, 0.827	5.4	b		102/103	Y,L,M,V,I,R
528	E	GLU:528:A	1.495	3	0.961, 1.523	4.3	b		147/150	E,A,S,K,N,R,H,T,V,Q,D,Y			528	E	GLU:528:A	-0.598	8	-0.753, -0.510	9.8	b		55/55	E,D,K		528	E	GLU:528:A	-0.095	5	-0.411, 0.026	7.5	b		150/152	N,A,R,M,S,E,D,K		528	E	GLU:528:A	-0.327	7	-0.558, -0.159	8.6	b		102/103	E,D,K,R,M,A
529	S	SER:529:A	0.883	4	0.365, 0.961	4.4	e		146/150	S,E,L,D,Q,G,T,M,A,N			529	S	SER:529:A	-0.075	5	-0.398, 0.174	7.5	e		55/55	G,E,V,S,M,T		529	S	SER:529:A	-0.080	5	-0.411, 0.148	7.5	e		150/152	E,D,R,G,V,S,M,T		529	S	SER:529:A	0.044	5	-0.247, 0.196	6.5	e		102/103	G,E,V,S,M,T,D,R
530	S	SER:530:A	-0.558	8	-0.648, -0.485	9.8	e	f	146/150	S,A,Q,L			530	S	SER:530:A	-0.189	6	-0.458, -0.073	8.5	e		55/55	A,T,S,E		530	S	SER:530:A	-0.224	6	-0.476, -0.081	7.5	e		151/152	A,H,G,T,S,E		530	S	SER:530:A	-0.203	6	-0.454, -0.058	7.5	e		102/103	A,T,S,E,G
531	G	GLY:531:A	-0.788	9	-0.814, -0.782	9.9	e	f	146/150	G			531	G	GLY:531:A	-0.514	8	-0.753, -0.398	9.7	e	f	55/55	G,V		531	G	GLY:531:A	0.033	5	-0.341, 0.289	7.5	e		151/152	G,P,E,S,V		531	G	GLY:531:A	-0.152	6	-0.509, 0.059	8.5	e		102/103	G,V,E,P
532	I	ILE:532:A	0.140	5	-0.098, 0.365	6.4	e		146/150	I,L,V,Q,M,F			532	I	ILE:532:A	-0.450	7	-0.638, -0.332	9.7	e		55/55	L,I,M,V		532	I	ILE:532:A	-0.273	6	-0.536, -0.081	7.5	e		151/152	V,L,S,M,I		532	I	ILE:532:A	-0.393	7	-0.602, -0.247	8.6	e		102/103	L,I,M,V,S
533	S	SER:533:A	-0.336	7	-0.485, -0.288	8.7	e		89/150	S,T,A,Q			533	S	SER:533:A	-0.410	7	-0.600, -0.257	8.6	e		55/55	S,W,F,T		533	S	SER:533:A	-0.239	6	-0.476, -0.081	7.5	e		150/152	T,A,R,I,S,W,F		533	S	SER:533:A	-0.301	7	-0.509, -0.159	8.6	e		101/103	S,W,F,T,A,R
534	Q	GLN:534:A	-0.283	7*	-0.791, -0.098	9.6	e		1/150	Q			534	Q	GLN:534:A	-0.295	7	-0.510, -0.171	8.6	e		54/55	M,I,Q,W,K		534	Q	GLN:534:A	0.116	5	-0.263, 0.289	6.5	e		149/152	F,P,Y,L,I,S,M,Q,W,K		534	Q	GLN:534:A	-0.045	5	-0.324, 0.196	7.5	e		100/103	M,I,Q,W,K,F,Y,L
535	Q	GLN:535:A	-0.283	7*	-0.791, -0.098	9.6	e		1/150	Q			535	Q	GLN:535:A	-0.497	8	-0.702, -0.398	9.7	e	f	34/55	L,Q,C		535	Q	GLN:535:A	0.224	5	-0.177, 0.456	6.4	e		84/152	T,A,V,I,K,L,Q,C		535	Q	GLN:535:A	-0.555	8	-0.739, -0.454	9.7	e	f	35/103	L,Q,C
[truncated: 4 more columns]

## Sheet: Dros_pockets
Gdh
Consurf homology search												Diptera Gdh-like												Diptera, mammalian												Diptera, Bb8 and Gdh-like
from -0.769 to -0.598 the grade is 9												from -0.595 to -0.463 the grade is 9												from -1.037 to -0.807 the grade is 9												from -0.858 to -0.667 the grade is 9
from -0.598 to -0.427 the grade is 8								Average COLOR - with sufficient data				from -0.463 to -0.331 the grade is 8								Average COLOR - with sufficient data				from -0.807 to -0.576 the grade is 8								Average COLOR - with sufficient data				from -0.667 to -0.477 the grade is 8								Average COLOR - with sufficient data
from -0.427 to -0.256 the grade is 7							whole	6.5935				from -0.331 to -0.198 the grade is 7							whole	7.5586				from -0.576 to -0.346 the grade is 7							whole	6.1049				from -0.477 to -0.286 the grade is 7							whole	6.3975
from -0.256 to -0.085 the grade is 6							akg	9				from -0.198 to -0.066 the grade is 6							akg	8				from -0.346 to -0.115 the grade is 6							akg	8.1429				from -0.286 to -0.095 the grade is 6							akg	8.7143
from -0.085 to 0.342 the grade is 5							GTP	8.5				from -0.066 to 0.504 the grade is 5							GTP	8.5385				from -0.115 to 0.363 the grade is 5							GTP	5.8571				from -0.095 to 0.369 the grade is 5							GTP	6.1429
from 0.342 to 1.026 the grade is 4							ADP	8.5				from 0.504 to 1.513 the grade is 4							ADP	8.381				from 0.363 to 1.088 the grade is 4							ADP	7.2917				from 0.369 to 1.108 the grade is 4							ADP	7.5833
from 1.026 to 1.709 the grade is 3							NADH	7.4615				from 1.513 to 2.522 the grade is 3							NADH	8.5385				from 1.088 to 1.813 the grade is 3							NADH	7.3846				from 1.108 to 1.846 the grade is 3							NADH	7.6154
from 1.709 to 2.393 the grade is 2												from 2.522 to 3.531 the grade is 2												from 1.813 to 2.538 the grade is 2												from 1.846 to 2.585 the grade is 2
from 2.393 to 3.077 the grade is 1												from 3.531 to 4.540 the grade is 1												from 2.538 to 3.263 the grade is 1												from 2.585 to 3.323 the grade is 1
POS	SEQ	3LATOM	SCORE	COLOR	CONFIDENCE INTERVAL	CONFIDENCE INTERVAL COLORS	B/E	FUNCTION	MSA DATA	RESIDUE VARIETY		POS	SEQ	3LATOM	SCORE	COLOR	CONFIDENCE INTERVAL	CONFIDENCE INTERVAL COLORS	B/E	FUNCTION	MSA DATA	RESIDUE VARIETY		POS	SEQ	3LATOM	SCORE	COLOR	CONFIDENCE INTERVAL	CONFIDENCE INTERVAL COLORS	B/E	FUNCTION	MSA DATA	RESIDUE VARIETY		POS	SEQ	3LATOM	SCORE	COLOR	CONFIDENCE INTERVAL	CONFIDENCE INTERVAL COLORS	B/E	FUNCTION	MSA DATA	RESIDUE VARIETY			POS
133	H	HIS:133:A	-0.767	9	-0.776, -0.767	9.9	b	s	149/150	H		133	H	HIS:133:A	0.055	5*	-0.482, 0.382	9.5	b		43/47	H,F		133	H	HIS:133:A	-0.310	6	-0.561, -0.106	7.5	b		137/152	H,F,Q,N		133	H	HIS:133:A	-0.206	6	-0.470, -0.079	7.5	b		97/103	H,N,Q,F			133
134	K	LYS:134:A	-0.617	9	-0.695, -0.586	9.8	e	f	149/150	K,R,C		134	K	LYS:134:A	0.951	4	0.029, 1.453	5.4	e		43/47	R,I,K		134	K	LYS:134:A	-0.180	6	-0.501, 0.002	7.5	e		136/152	R,I,K,D,C,H		134	K	LYS:134:A	-0.497	8	-0.692, -0.410	9.7	e	f	97/103	R,K,I			134
138	K	LYS:138:A	-0.766	9	-0.776, -0.762	9.9	b	s	149/150	K		138	K	LYS:138:A	0.090	5*	-0.482, 0.382	9.5	b		43/47	K,Q		138	K	LYS:138:A	-0.633	8	-0.838, -0.501	9.7	b		136/152	K,Q,N,S,R		138	K	LYS:138:A	-0.745	9	-0.852, -0.692	9.9	b	s	96/103	K,Q			138
140	G	GLY:140:A	-0.757	9	-0.775, -0.756	9.9	b	s	148/150	G		140	G	GLY:140:A	1.555	3	0.186, 2.251	5.3	b		44/47	G,C		140	G	GLY:140:A	0.063	5	-0.365, 0.266	7.5	b		136/152	G,C,V,D		140	G	GLY:140:A	-0.374	7	-0.656, -0.178	8.6	b		97/103	G,C			140
160	T	THR:160:A	-0.742	9	-0.767, -0.727	9.9	b	s	150/150	T,S		160	T	THR:160:A	-0.568	9	-0.713, -0.564	9.9	b	s	46/47	T		160	T	THR:160:A	-0.640	8	-0.838, -0.501	9.7	b		143/152	T,A,S		160	T	THR:160:A	-0.549	8	-0.724, -0.470	9.7	b		100/103	T,A,S			160
162	K	LYS:162:A	-0.766	9	-0.776, -0.762	9.9	b	s	150/150	K		162	K	LYS:162:A	-0.540	9	-0.713, -0.527	9.9	b	s	46/47	K		162	K	LYS:162:A	-1.019	9	-1.085, -0.993	9.9	b	s	143/152	K		162	K	LYS:162:A	-0.846	9	-0.894, -0.837	9.9	b	s	100/103	K			162
164	A	ALA:164:A	-0.647	9	-0.713, -0.620	9.9	b	s	150/150	A,S		164	A	ALA:164:A	-0.553	9	-0.713, -0.527	9.9	b	s	46/47	A		164	A	ALA:164:A	-0.725	8	-0.907, -0.616	9.8	b		143/152	A,V,S		164	A	ALA:164:A	-0.642	8	-0.778, -0.574	9.8	b		100/103	S,A			164
167	D	ASP:167:A	-0.653	9	-0.713, -0.620	9.9	e	f	150/150	D,N		167	D	ASP:167:A	-0.524	9	-0.713, -0.482	9.9	e	f	46/47	D		167	D	ASP:167:A	-0.674	8	-0.838, -0.561	9.7	e	f	143/152	D,H,N,S		167	D	ASP:167:A	-0.508	8	-0.692, -0.410	9.7	e	f	100/103	H,N,S,D			167
168	V	VAL:168:A	-0.768	9	-0.776, -0.767	9.9	b	s	150/150	V		168	V	VAL:168:A	-0.576	9	-0.713, -0.564	9.9	b	s	46/47	V		168	V	VAL:168:A	-0.216	6	-0.501, 0.002	7.5	b		143/152	V,M,L,I,A		168	V	VAL:168:A	-0.098	6	-0.410, 0.037	7.5	b		100/103	V,L,I,A			168
169	P	PRO:169:A	-0.753	9	-0.775, -0.749	9.9	e	f	150/150	P		169	P	PRO:169:A	-0.420	8	-0.711, -0.367	9.8	e	f	46/47	P		169	P	PRO:169:A	-0.810	9	-0.993, -0.715	9.8	e	f	145/152	P,L		169	P	PRO:169:A	-0.809	9	-0.894, -0.778	9.9	e	f	100/103	P			169
170	F	PHE:170:A	-0.764	9	-0.776, -0.762	9.9	b	s	150/150	F		170	F	PHE:170:A	-0.516	9	-0.713, -0.482	9.9	b	s	46/47	F		170	F	PHE:170:A	-0.274	6	-0.561, -0.106	7.5	b		145/152	F,L,V,Y		170	F	PHE:170:A	-0.363	7	-0.617, -0.178	8.6	b		100/103	F,Y			170
174	K	LYS:174:A	-0.766	9	-0.776, -0.762	9.9	b	s	150/150	K		174	K	LYS:174:A	-0.540	9	-0.713, -0.527	9.9	b	s	46/47	K		174	K	LYS:174:A	-1.021	9	-1.085, -0.993	9.9	b	s	145/152	K		174	K	LYS:174:A	-0.846	9	-0.894, -0.837	9.9	b	s	100/103	K			174
216	D	ASP:216:A	-0.764	9	-0.776, -0.762	9.9	e	f	150/150	D		216	D	ASP:216:A	-0.524	9	-0.713, -0.482	9.9	e	f	46/47	D		216	D	ASP:216:A	-1.011	9	-1.085, -0.993	9.9	e	f	145/152	D		216	D	ASP:216:A	-0.840	9	-0.894, -0.820	9.9	e	f	100/103	D			216
217	M	MET:217:A	-0.727	9	-0.756, -0.713	9.9	e	f	150/150	M,V		217	M	MET:217:A	-0.591	9	-0.713, -0.564	9.9	e	f	46/47	M		217	M	MET:217:A	-0.563	7	-0.759, -0.436	8.7	e		145/152	M,V		217	M	MET:217:A	-0.332	7	-0.574, -0.178	8.6	e		100/103	M,V			217
218	G	GLY:218:A	-0.464	8	-0.586, -0.375	8.7	e	f	150/150	G,S,N,A		218	G	GLY:218:A	-0.449	8	-0.711, -0.430	9.8	e	f	46/47	G		218	G	GLY:218:A	-0.635	8	-0.838, -0.501	9.7	e	f	146/152	S,G,E,N		218	G	GLY:218:A	-0.742	9	-0.852, -0.692	9.9	e	f	100/103	G,N			218
251	I	ILE:251:A	-0.723	9	-0.756, -0.713	9.9	e	f	150/150	I,V		251	I	ILE:251:A	-0.582	9	-0.713, -0.564	9.9	e	f	46/47	I		251	I	ILE:251:A	-0.391	7	-0.616, -0.201	8.6	e		146/152	I,L,V		251	I	ILE:251:A	-0.128	6	-0.410, 0.037	7.5	e		101/103	L,V,I			251
252	N	ASN:252:A	-0.451	8	-0.545, -0.375	8.7	e	f	150/150	N,S,H,T,L,P,A		252	N	ASN:252:A	-0.564	9	-0.713, -0.564	9.9	e	f	46/47	N		252	N	ASN:252:A	-0.060	5	-0.365, 0.124	7.5	e		146/152	S,N,R,C,H,A,E,D		252	N	ASN:252:A	-0.205	6	-0.470, -0.079	7.5	e		101/103	H,N,A,S,E,D			252
254	G	GLY:254:A	-0.757	9	-0.775, -0.756	9.9	e	f	150/150	G		254	G	GLY:254:A	-0.449	8	-0.711, -0.430	9.8	e	f	46/47	G		254	G	GLY:254:A	-0.756	8	-0.967, -0.616	9.8	e	f	146/152	G,R		254	G	GLY:254:A	-0.794	9	-0.890, -0.752	9.9	e	f	101/103	G			254
255	G	GLY:255:A	-0.757	9	-0.775, -0.756	9.9	b	s	150/150	G		255	G	GLY:255:A	-0.449	8	-0.711, -0.430	9.8	b		46/47	G		255	G	GLY:255:A	-0.948	9	-1.073, -0.907	9.9	b	s	146/152	G		255	G	GLY:255:A	-0.794	9	-0.890, -0.752	9.9	b	s	101/103	G			255
257	H	HIS:257:A	-0.678	9	-0.727, -0.650	9.9	e	f	150/150	H,E,R,Q		257	H	HIS:257:A	-0.554	9	-0.713, -0.527	9.9	e	f	46/47	H		257	H	HIS:257:A	-0.649	8	-0.838, -0.561	9.7	e	f	146/152	H,Y,R,N		257	H	HIS:257:A	-0.564	8	-0.724, -0.470	9.7	e	f	101/103	R,N,H			257
258	G	GLY:258:A	-0.757	9	-0.775, -0.756	9.9	e	f	150/150	G		258	G	GLY:258:A	-0.449	8	-0.711, -0.430	9.8	e	f	46/47	G		258	G	GLY:258:A	-0.561	7	-0.838, -0.365	9.7	e		146/152	G,E,R		258	G	GLY:258:A	-0.794	9	-0.890, -0.752	9.9	e	f	101/103	G			258
259	R	ARG:259:A	-0.765	9	-0.776, -0.762	9.9	e	f	150/150	R		259	R	ARG:259:A	-0.527	9	-0.713, -0.527	9.9	e	f	46/47	R		259	R	ARG:259:A	-0.686	8	-0.874, -0.561	9.7	e	f	146/152	R,Q,C,W		259	R	ARG:259:A	-0.840	9	-0.894, -0.820	9.9	e	f	101/103	R			259
260	V	VAL:260:A	0.012	5	-0.201, 0.059	6.5	e		150/150	V,I,T		260	V	VAL:260:A	-0.576	9	-0.713, -0.564	9.9	e	f	46/47	V		260	V	VAL:260:A	-0.108	5	-0.436, 0.124	7.5	e		146/152	I,V,T,H,F,E,N,A		260	V	VAL:260:A	-0.044	5	-0.342, 0.172	7.5	e		101/103	T,H,F,E,N,A,V			260
261	S	SER:261:A	-0.746	9	-0.770, -0.739	9.9	b	s	150/150	S,A		261	S	SER:261:A	-0.583	9	-0.713, -0.564	9.9	b	s	46/47	S		261	S	SER:261:A	-0.259	6	-0.501, -0.106	7.5	b		146/152	S,F,T,E,A,Q		261	S	SER:261:A	-0.298	7	-0.525, -0.178	8.6	b		101/103	E,A,S,Q			261
265	R	ARG:265:A	-0.765	9	-0.776, -0.762	9.9	b	s	150/150	R		265	R	ARG:265:A	-0.527	9	-0.713, -0.527	9.9	b	s	46/47	R		265	R	ARG:265:A	-0.683	8	-0.874, -0.561	9.7	b		144/152	R,Q,H,K		265	R	ARG:265:A	-0.727	9	-0.837, -0.656	9.8	b	s	101/103	R,K			265
300	F	PHE:300:A	-0.390	7	-0.545, -0.296	8.7	b		150/150	F,L,V,A,C		300	F	PHE:300:A	-0.521	9	-0.713, -0.482	9.9	b	s	47/47	F		300	F	PHE:300:A	-0.433	7	-0.715, -0.287	8.6	b		149/152	F,Y		300	F	PHE:300:A	-0.207	6	-0.525, -0.079	8.5	b		101/103	Y,F			300
302	N	ASN:302:A	-0.767	9	-0.776, -0.767	9.9	e	f	150/150	N		302	N	ASN:302:A	-0.568	9	-0.713, -0.564	9.9	e	f	47/47	N		302	N	ASN:302:A	-0.965	9	-1.057, -0.907	9.9	e	f	149/152	N,D		302	N	ASN:302:A	-0.857	9	-0.896, -0.837	9.9	e	f	101/103	N			302
305	L	LEU:305:A	-0.381	7	-0.545, -0.296	8.7	b		150/150	L,M,F,Y,R		305	L	LEU:305:A	-0.518	9	-0.713, -0.482	9.9	b	s	47/47	L		305	L	LEU:305:A	-0.347	7	-0.616, -0.201	8.6	b		149/152	L,Q,R,F,M,S,T		305	L	LEU:305:A	-0.475	7	-0.656, -0.342	8.7	b		101/103	M,Q,S,T,L			305
306	H	HIS:306:A	-0.737	9	-0.767, -0.727	9.9	b	s	150/150	H,Y		306	H	HIS:306:A	-0.559	9	-0.713, -0.527	9.9	b	s	47/47	H		306	H	HIS:306:A	0.680	4	0.124, 0.893	5.4	b		150/152	H,Y,P,F,W		306	H	HIS:306:A	0.557	4	0.037, 0.797	5.4	b		101/103	Y,H,F,W			306
309	R	ARG:309:A	-0.728	9	-0.762, -0.713	9.9	e	f	150/150	R,K		309	R	ARG:309:A	-0.532	9	-0.713, -0.527	9.9	e	f	47/47	R		309	R	ARG:309:A	-0.290	6	-0.561, -0.106	7.5	e		150/152	R,K,H,E,V,L,I		309	R	ARG:309:A	-0.170	6	-0.410, 0.037	7.5	e		101/103	H,E,V,L,K,I,R			309
310	Y	TYR:310:A	-0.717	9	-0.762, -0.695	9.9	b	s	150/150	Y,N		310	Y	TYR:310:A	-0.504	9	-0.713, -0.482	9.9	b	s	47/47	Y		310	Y	TYR:310:A	-0.151	6	-0.501, 0.124	7.5	b		150/152	Y,F,H,S		310	Y	TYR:310:A	0.100	5	-0.266, 0.335	6.5	b		101/103	F,H,Y,S			310
313	R	ARG:313:A	-0.615	9	-0.695, -0.586	9.8	e	f	150/150	R,P,Y,G,C		313	R	ARG:313:A	-0.532	9	-0.713, -0.527	9.9	e	f	47/47	R		313	R	ARG:313:A	0.483	4	0.124, 0.636	5.4	e		150/152	R,H,N,C,Q,K,E,D		313	R	ARG:313:A	0.078	5	-0.266, 0.335	6.5	e		101/103	Q,K,R,E,D			313
323	E	GLU:323:A	-0.764	9	-0.776, -0.762	9.9	e	f	150/150	E		323	E	GLU:323:A	-0.526	9	-0.713, -0.482	9.9	e	f	47/47	E		323	E	GLU:323:A	-0.943	9	-1.038, -0.874	9.9	e	f	150/152	E,D		323	E	GLU:323:A	-0.851	9	-0.894, -0.837	9.9	e	f	101/103	E			323
324	H	HIS:324:A	3.054	1	1.405, 3.077	3.1	e		150/150	H,R,W,Y,V,I,L,M,S,K,F		324	H	HIS:324:A	-0.559	9	-0.713, -0.527	9.9	e	f	47/47	H		324	H	HIS:324:A	2.820	1	1.243, 3.269	3.1	e		150/152	S,I,H,F,A,R,K,V,M,W,L		324	H	HIS:324:A	3.217	1	1.727, 3.323	3.1	e		101/103	A,R,K,I,V,F,M,H,W,S,L			324
337	K	LYS:337:A	-0.475	8	-0.586, -0.442	8.8	e	f	150/150	K,R,T,L,I		337	K	LYS:337:A	-0.545	9	-0.713, -0.527	9.9	e	f	47/47	K		337	K	LYS:337:A	0.205	5	-0.106, 0.433	5.4	e		150/152	K,N,G,D,E,T		337	K	LYS:337:A	0.446	4	0.037, 0.797	5.4	e		101/103	G,K,N,D,E,T			337
340	E	GLU:340:A	-0.649	9	-0.713, -0.620	9.9	b	s	150/150	E,V,Q		340	E	GLU:340:A	-0.526	9	-0.713, -0.482	9.9	b	s	47/47	E		340	E	GLU:340:A	0.434	4	0.002, 0.636	5.4	b		151/152	E,A,V,G,S,M,F,L,I		340	E	GLU:340:A	0.601	4	0.172, 0.797	5.4	b		102/103	A,G,S,M,F,L,I,E			340
375	A	ALA:375:A	-0.737	9	-0.767, -0.727	9.9	e	f	150/150	A,S		375	A	ALA:375:A	-0.558	9	-0.713, -0.527	9.9	e	f	47/47	A		375	A	ALA:375:A	-0.933	9	-1.038, -0.874	9.9	e	f	151/152	A,S		375	A	ALA:375:A	-0.750	9	-0.852, -0.692	9.9	e	f	102/103	A,S			375
376	V	VAL:376:A	1.063	3	0.485, 1.405	4.3	e		150/150	V,L,I,T,G,S,M,A,K,N		376	V	VAL:376:A	0.893	4	0.029, 1.453	5.4	e		47/47	I,V		376	V	VAL:376:A	0.366	4	0.002, 0.636	5.4	e		151/152	S,R,G,I,V,T,N,M		376	V	VAL:376:A	-0.238	6	-0.470, -0.079	7.5	e		102/103	V,M,T,I			376
379	V	VAL:379:A	-0.238	6	-0.375, -0.201	7.6	b		150/150	V,A,T,I,Q,C,S		379	V	VAL:379:A	-0.580	9	-0.713, -0.564	9.9	b	s	47/47	V		379	V	VAL:379:A	-0.374	7	-0.616, -0.201	8.6	b		152/152	Q,V,E,P,S,T,A		379	V	VAL:379:A	-0.432	7	-0.617, -0.342	8.7	b		103/103	S,T,A,V			379
398	N	ASN:398:A	-0.767	9	-0.776, -0.767	9.9	e	f	150/150	N		398	N	ASN:398:A	-0.568	9	-0.713, -0.564	9.9	e	f	47/47	N		398	N	ASN:398:A	-1.037	9	-1.085, -1.017	9.9	e	f	152/152	N		398	N	ASN:398:A	-0.858	9	-0.896, -0.852	9.9	e	f	103/103	N			398
423	N	ASN:423:A	-0.767	9	-0.776, -0.767	9.9	b	s	150/150	N		423	N	ASN:423:A	-0.568	9	-0.713, -0.564	9.9	b	s	47/47	N		423	N	ASN:423:A	-1.037	9	-1.085, -1.017	9.9	b	s	151/152	N		423	N	ASN:423:A	-0.858	9	-0.896, -0.852	9.9	b	s	103/103	N			423
430	S	SER:430:A	-0.769	9	-0.776, -0.767	9.9	b	s	150/150	S		430	S	SER:430:A	-0.587	9	-0.713, -0.564	9.9	b	s	47/47	S		430	S	SER:430:A	-0.961	9	-1.057, -0.907	9.9	b	s	152/152	S,L		430	S	SER:430:A	-0.857	9	-0.896, -0.837	9.9	b	s	103/103	S			430
431	F	PHE:431:A	-0.456	8	-0.586, -0.375	8.7	e	f	150/150	F,Y		431	F	PHE:431:A	-0.521	9	-0.713, -0.482	9.9	e	f	47/47	F		431	F	PHE:431:A	-0.853	9	-1.017, -0.759	9.8	e	f	152/152	Y,F		431	F	PHE:431:A	-0.679	9	-0.820, -0.617	9.8	e	f	103/103	Y,F			431
436	K	LYS:436:A	-0.766	9	-0.776, -0.762	9.9	b	s	150/150	K		436	K	LYS:436:A	-0.545	9	-0.713, -0.527	9.9	b	s	47/47	K		436	K	LYS:436:A	-0.934	9	-1.038, -0.874	9.9	b	s	152/152	K,T		436	K	LYS:436:A	-0.751	9	-0.852, -0.692	9.9	b	s	103/103	K,T			436
441	V	VAL:441:A	-0.694	9	-0.739, -0.674	9.9	e	f	150/150	V,T,I,S		441	V	VAL:441:A	-0.580	9	-0.713, -0.564	9.9	e	f	47/47	V		441	V	VAL:441:A	-0.829	9	-0.967, -0.759	9.8	e	f	152/152	V,D,I		441	V	VAL:441:A	-0.742	9	-0.852, -0.692	9.9	e	f	103/103	I,V			441
442	S	SER:442:A	-0.769	9	-0.776, -0.767	9.9	e	f	150/150	S		442	S	SER:442:A	-0.587	9	-0.713, -0.564	9.9	e	f	47/47	S		442	S	SER:442:A	-0.884	9	-0.993, -0.838	9.9	e	f	152/152	S,R,T		442	S	SER:442:A	-0.773	9	-0.865, -0.724	9.9	e	f	103/103	S,T			442
445	R	ARG:445:A	-0.728	9	-0.762, -0.713	9.9	e	f	150/150	R,K		445	R	ARG:445:A	-0.532	9	-0.713, -0.527	9.9	e	f	47/47	R		445	R	ARG:445:A	-0.534	7	-0.759, -0.365	8.7	e		152/152	R,H,K		445	R	ARG:445:A	-0.646	8	-0.778, -0.574	9.8	e	f	103/103	K,R			445
507	E	GLU:507:A	-0.764	9	-0.776, -0.762	9.9	b	s	150/150	E		507	E	GLU:507:A	-0.504	9	-0.713, -0.482	9.9	b	s	44/47	E		507	E	GLU:507:A	-0.861	9	-0.993, -0.800	9.8	b	s	148/152	E,K		507	E	GLU:507:A	-0.851	9	-0.894, -0.837	9.9	b	s	100/103	E			494
508	K	LYS:508:A	-0.698	9	-0.749, -0.674	9.9	e	f	150/150	K,V		508	K	LYS:508:A	0.772	4	-0.099, 1.453	6.4	e		47/47	K,S,E		508	K	LYS:508:A	-0.454	7	-0.667, -0.287	8.6	e		150/152	K,E,A,S,T		508	K	LYS:508:A	-0.323	7	-0.574, -0.178	8.6	e		102/103	A,E,S,T,K			495
512	H	HIS:512:A	-0.677	9	-0.727, -0.650	9.9	b	s	150/150	H,L,Y,Q		512	H	HIS:512:A	0.011	5*	-0.482, 0.382	9.5	b		47/47	H,R		512	H	HIS:512:A	-0.038	5	-0.365, 0.124	7.5	b		151/152	H,R,Y,A,S,T,D		512	H	HIS:512:A	-0.247	6	-0.525, -0.079	8.5	b		103/103	A,S,T,D,H,R			499
514	G	GLY:514:A	-0.757	9	-0.775, -0.756	9.9	e	f	150/150	G		514	G	GLY:514:A	-0.455	8	-0.711, -0.430	9.8	e	f	47/47	G		514	G	GLY:514:A	-0.102	5	-0.436, 0.124	7.5	e		151/152	G,C,A,S,V		514	G	GLY:514:A	-0.529	8	-0.724, -0.410	9.7	e	f	103/103	G,A			501
517	Y	TYR:517:A	-0.262	7	-0.442, -0.201	8.6	e		150/150	Y,F,T,Q,H		517	Y	TYR:517:A	0.314	5*	-0.430, 0.634	8.4	e		47/47	Y,R		517	Y	TYR:517:A	-0.216	6	-0.501, 0.002	7.5	e		151/152	Y,R,D,P,C,F,T		517	Y	TYR:517:A	-0.383	7	-0.617, -0.266	8.6	e		103/103	F,T,Y,R			504
521	R	ARG:521:A	-0.469	8	-0.586, -0.375	8.7	e	f	150/150	R,H,K		521	R	ARG:521:A	-0.532	9	-0.713, -0.527	9.9	e	f	47/47	R		521	R	ARG:521:A	0.617	4	0.124, 0.893	5.4	e		151/152	R,H,P,Y,S,C,T,A,F,M		521	R	ARG:521:A	0.330	5	-0.079, 0.536	5.4	e		103/103	T,S,A,F,M,R			508
550	K	LYS:550:A	-0.766	9	-0.776, -0.762	9.9	e	f	147/150	K		550	K	LYS:550:A	0.114	5*	-0.482, 0.382	9.5	e		47/47	K,P		550	K	LYS:550:A	-0.841	9	-0.967, -0.759	9.8	e	f	152/152	K,A,P		550	K	LYS:550:A	-0.750	9	-0.852, -0.692	9.9	e	f	103/103	K,P			537
553	T	THR:553:A	1.321	3	0.834, 1.405	4.3	e		147/150	T,Q,A,S,I,N,E,L,K,G,H,V,R,D		553	T	THR:553:A	1.120	4	0.186, 1.453	5.4	e		47/47	Q,T,E		553	T	THR:553:A	0.977	4	0.433, 1.243	4.3	e		152/152	K,R,A,Q,T,E,L,N,H,S		553	T	THR:553:A	0.834	4	0.335, 1.155	5.3	e		103/103	K,L,R,N,Q,H,E,S,T			540
554	T	THR:554:A	-0.597	8	-0.674, -0.545	9.8	e	f	146/150	T,N,V,I,S		554	T	THR:554:A	-0.572	9	-0.713, -0.564	9.9	e	f	47/47	T		554	T	THR:554:A	-0.143	6	-0.436, 0.002	7.5	e		151/152	V,A,T,L,S,G		554	T	THR:554:A	-0.220	6	-0.470, -0.079	7.5	e		103/103	A,S,T,V,G			541
[truncated: 49 more columns]

## Sheet: GLUD_sum
GLUD1												GLUD1													GLUD2												GLUD2
Consurf homology search												GLUD1 Mammalian													Consurf homology search												GLUD2 Mammalian
from -0.813 to -0.632 the grade is 9												from -0.819 to -0.637 the grade is 9													from -0.793 to -0.617 the grade is 9												from -1.318 to -1.025 the grade is 9
from -0.632 to -0.452 the grade is 8												from -0.637 to -0.455 the grade is 8													from -0.617 to -0.440 the grade is 8												from -1.025 to -0.732 the grade is 8
from -0.452 to -0.271 the grade is 7								Average COLOR - with sufficient data				from -0.455 to -0.273 the grade is 7								Average COLOR - with sufficient data					from -0.440 to -0.264 the grade is 7								Average COLOR - with sufficient data				from -0.732 to -0.439 the grade is 7								Average COLOR - with sufficient data
from -0.271 to -0.090 the grade is 6								6.49372				from -0.273 to -0.091 the grade is 6								7.80871					from -0.264 to -0.088 the grade is 6								6.53142				from -0.439 to -0.146 the grade is 6								6.16828
from -0.090 to 0.336 the grade is 5												from -0.091 to 0.368 the grade is 5													from -0.088 to 0.330 the grade is 5												from -0.146 to 0.388 the grade is 5
from 0.336 to 1.008 the grade is 4												from 0.368 to 1.104 the grade is 4													from 0.330 to 0.991 the grade is 4												from 0.388 to 1.163 the grade is 4
from 1.008 to 1.680 the grade is 3												from 1.104 to 1.839 the grade is 3													from 0.991 to 1.652 the grade is 3												from 1.163 to 1.938 the grade is 3
from 1.680 to 2.352 the grade is 2												from 1.839 to 2.575 the grade is 2													from 1.652 to 2.312 the grade is 2												from 1.938 to 2.714 the grade is 2
from 2.352 to 3.024 the grade is 1												from 2.575 to 3.311 the grade is 1													from 2.312 to 2.973 the grade is 1												from 2.714 to 3.489 the grade is 1
POS	SEQ	3LATOM	SCORE	COLOR	CONFIDENCE INTERVAL	CONFIDENCE INTERVAL COLORS	B/E	FUNCTION	MSA DATA	RESIDUE VARIETY		POS	SEQ	3LATOM	SCORE	COLOR	CONFIDENCE INTERVAL	CONFIDENCE INTERVAL COLORS	B/E	FUNCTION	MSA DATA	RESIDUE VARIETY			POS	SEQ	3LATOM	SCORE	COLOR	CONFIDENCE INTERVAL	CONFIDENCE INTERVAL COLORS	B/E	FUNCTION	MSA DATA	RESIDUE VARIETY		POS	SEQ	3LATOM	SCORE	COLOR	CONFIDENCE INTERVAL	CONFIDENCE INTERVAL COLORS	B/E	FUNCTION	MSA DATA	RESIDUE VARIETY
			(normalized)												(normalized)													(normalized)												(normalized)
1	M	MET:1:A	-0.749	9	-0.822, -0.734	9.9	e	f	23/150	M		1	M	MET:1:A	-0.449	9	-0.738, -0.444		9.9	e	f	16/23	M		1	M	MET:1:A	0.514	4	-0.055, 0.843	5.4	e		26/150	M,K,S,A,I,V		1	M	MET:1:A	1.292	3	-0.060, 2.008	5.2	e		13/26	V,M,T		1
2	Y	TYR:2:A	-0.392	7	-0.689, -0.225	9.6	e		25/150	Y,F		2	Y	TYR:2:A	3.055	2	1.015, 5.326		4.1	e		17/23	Y,M,F		2	Y	TYR:2:A	1.449	3	0.506, 1.391	4.3	e		28/150	Y,F,S,A,V,T,I		2	Y	TYR:2:A	2.718	1	1.244, 4.327	3.1	e		14/26	Q,Y,L,M,F		2
3	R	ARG:3:A	-0.225	6	-0.550, -0.003	8.5	e		26/150	R,L,C		3	R	ARG:3:A	0.834	4	-0.281, 1.574		7.4	e		17/23	R,K		3	R	ARG:3:A	2.718	1	1.391, 2.973	3.1	e		28/150	R,L,A,C,I,T,N		3	R	ARG:3:A	0.582	4*	-0.621, 1.244	7.3	e		14/26	K,R,Q		3
4	Y	TYR:4:A	1.697	2	0.570, 3.024	4.1	e		25/150	Y,C,R,A		4	Y	TYR:4:A	4.242	1	1.574, 5.326		4.1	e		17/23	Y,C,N		4	Y	TYR:4:A	2.476	1	0.843, 2.973	4.1	e		20/150	Y,C,R,K,N,T,A		4	Y	TYR:4:A	1.826	3	0.378, 2.663	5.2	e		14/26	Y,C,F		4
5	L	LEU:5:A	0.256	5	-0.225, 0.570	6.4	e		25/150	L,F,V		5	L	LEU:5:A	-0.382	8	-0.738, -0.371		9.8	e	f	17/23	L		5	L	LEU:5:A	1.118	3	0.268, 1.391	5.3	e		22/150	L,H,V,A,Q,S		5	L	LEU:5:A	0.164	5*	-0.994, 0.975	8.4	e		14/26	L,W		5
6	G	GLY:6:A	0.153	5	-0.384, 0.570	7.4	e		25/150	G,A,R		6	G	GLY:6:A	1.468	4*	-0.170, 2.509		7.3	e		17/23	G,K		6	A	ALA:6:A	0.966	4	0.268, 1.391	5.3	e		24/150	A,G,R,N,Q,S,K		6	A	ALA:6:A	1.906	3	0.378, 2.663	5.2	e		14/26	L,G,A,R		6
7	E	GLU:7:A	0.156	5	-0.310, 0.570	7.4	e		25/150	E,K,A		7	E	GLU:7:A	0.960	4	-0.281, 1.574		7.4	e		17/23	E,A		7	K	LYS:7:A	2.448	1	0.843, 2.973	4.1	e		36/150	K,E,A,N,P,Q,S,H		7	K	LYS:7:A	2.534	2	0.975, 4.327	4.1	e		14/26	K,E,S,P		7
8	A	ALA:8:A	1.062	3	0.143, 1.457	5.3	e		15/150	A,V,I,L		8	A	ALA:8:A	-0.481	9	-0.738, -0.505		9.9	e	f	17/23	A		8	A	ALA:8:A	1.987	2	0.843, 2.973	4.1	e		40/150	A,V,Q,N,S,G,I,R,D,L		8	A	ALA:8:A	2.396	2	0.975, 4.327	4.1	e		14/26	L,A,F,V		8
9	L	LEU:9:A	0.206	5	-0.384, 0.570	7.4	e		15/150	L,A,F		9	L	LEU:9:A	2.849	2	0.633, 5.326		4.1	e		17/23	L,M,S		9	L	LEU:9:A	2.637	1	1.391, 2.973	3.1	e		39/150	L,A,D,E,S,R,I,F,Q		9	L	LEU:9:A	0.938	4*	-0.303, 2.008	6.2	e		14/26	L,Q,V		9
10	L	LEU:10:A	0.816	4	0.143, 1.457	5.3	e		25/150	L,Q,S,T,A		10	L	LEU:10:A	2.950	2	0.633, 5.326		4.1	e		17/23	L,R,Q		10	L	LEU:10:A	2.943	1	1.391, 2.973	3.1	e		42/150	L,Q,A,F,V,S,I,P,T		10	L	LEU:10:A	1.721	3	0.218, 2.663	5.2	e		14/26	V,L,S,Q		10
11	L	LEU:11:A	1.752	2	0.570, 3.024	4.1	e		25/150	L,P,V,F,Q,S		11	L	LEU:11:A	-0.382	8	-0.738, -0.371		9.8	e	f	17/23	L		11	P	PRO:11:A	2.911	1	1.391, 2.973	3.1	e		43/150	P,L,Q,A,S,E,R,T,K,V,N,I		11	P	PRO:11:A	2.887	1	1.244, 4.327	3.1	e		15/26	I,L,M,G,P,T		11
12	S	SER:12:A	0.878	4	0.143, 1.457	5.3	e		25/150	S,T,P,G,A		12	S	SER:12:A	1.818	3	0.352, 2.509		5.3	e		17/23	S,A,P		12	S	SER:12:A	2.965	1	1.391, 2.973	3.1	e		57/150	S,R,T,V,L,A,K,M,G,N,Q,I,P,F		12	S	SER:12:A	1.545	3	0.218, 2.663	5.2	e		15/26	Y,S,A,F		12
13	R	ARG:13:A	-0.154	6	-0.502, 0.143	8.5	e		25/150	R,A,Q		13	R	ARG:13:A	1.106	4	-0.281, 1.574		7.4	e		16/23	X,R,N		13	R	ARG:13:A	1.700	2	0.843, 1.391	4.3	e		62/150	R,A,N,K,T,Q,S,E,I,V,L		13	R	ARG:13:A	-0.139	5*	-1.168, 0.553	9.4	e		13/26	R,P		13
14	A	ALA:14:A	1.916	2	0.908, 3.024	4.1	e		25/150	A,T,V,G,S,R		14	A	ALA:14:A	4.772	1	2.509, 5.326		3.1	e		17/23	G,I,A,V,P,T		14	A	ALA:14:A	2.952	1	1.391, 2.973	3.1	e		63/150	A,V,S,H,Y,R,Q,L,T,I,N,M,F,K,C		14	A	ALA:14:A	1.931	3	0.553, 2.663	4.2	e		13/26	I,A,V,T		14
15	G	GLY:15:A	1.346	3	0.328, 1.457	5.3	e		25/150	G,A,S,Q,E		15	G	GLY:15:A	1.212	4	-0.170, 1.574		7.4	e		17/23	G,W		15	G	GLY:15:A	2.973	1	1.391, 2.973	3.1	e		62/150	G,A,W,T,L,I,Y,V,Q,S,C,N,D,K,E,H		15	G	GLY:15:A	0.189	5*	-0.994, 0.975	8.4	e		13/26	G,V		15
16	P	PRO:16:A	1.364	3	0.328, 1.457	5.3	e		25/150	P,A,G,T,S		16	P	PRO:16:A	1.143	4	-0.170, 1.574		7.4	e		17/23	P,A		16	P	PRO:16:A	2.960	1	1.391, 2.973	3.1	e		71/150	P,A,N,T,L,V,K,D,E,H,R,S,W		16	P	PRO:16:A	0.921	4*	-0.414, 2.008	6.2	e		14/26	P,R,T		16
17	A	ALA:17:A	0.724	4	0.143, 0.908	5.4	e		27/150	A,S,G,N,V,T,C		17	A	ALA:17:A	3.448	2	1.015, 5.326		4.1	e		17/23	P,A,D,S		17	A	ALA:17:A	2.729	1	1.391, 2.973	3.1	e		76/150	A,S,G,T,V,R,H,L,N,I,M,P,Y		17	A	ALA:17:A	-0.274	6*	-1.168, 0.378	9.5	e		14/26	A,G		17
18	A	ALA:18:A	1.013	3	0.328, 1.457	5.3	e		27/150	A,E,K,F,V,T,S		18	A	ALA:18:A	2.110	3	0.352, 2.509		5.3	e		17/23	A,D,V		18	A	ALA:18:A	2.724	1	1.391, 2.973	3.1	e		76/150	A,E,K,L,V,S,I,T,M,P,Q,H,R,F		18	A	ALA:18:A	-0.275	6*	-1.254, 0.378	9.5	e		14/26	A,S		18
19	L	LEU:19:A	1.986	2	0.908, 3.024	4.1	e		26/150	L,A,W,V,F,S,M		19	L	LEU:19:A	3.305	2	1.015, 5.326		4.1	e		17/23	L,T,S		19	L	LEU:19:A	1.618	3	0.506, 2.973	4.1	e		19/150	L,A,F,I,S,V		19	L	LEU:19:A	1.031	4*	-0.303, 2.008	6.2	e		14/26	L,P,A		19
20	G	GLY:20:A	1.834	2	0.570, 3.024	4.1	e		26/150	G,A,R,T,E,Y,L		20	G	GLY:20:A	4.154	1	1.574, 5.326		4.1	e		17/23	G,K,A,S		20	G	GLY:20:A	1.500	3	0.506, 2.973	4.1	e		19/150	G,A,V,T,Q,M,H,R		20	G	GLY:20:A	0.902	4*	-0.414, 2.008	6.2	e		14/26	G,A,T		20
21	S	SER:21:A	0.679	4	0.143, 0.908	5.4	e		43/150	S,L,A,T,Q,N,G,R		21	S	SER:21:A	4.387	1	1.574, 5.326		4.1	e		17/23	S,I,A,P,L		21	S	SER:21:A	0.317	5	-0.172, 0.506	6.4	e		15/150	S,A,T,Y		21	S	SER:21:A	1.338	3	0.074, 2.008	5.2	e		14/26	S,E,P,N		21
22	A	ALA:22:A	2.654	1	1.457, 3.024	3.1	e		42/150	A,V,G,T,D,K,I,S,Q		22	A	ALA:22:A	2.357	3*	0.352, 5.326		5.1	e		17/23	A,V,F		22	A	ALA:22:A	0.892	4	0.087, 1.391	5.3	e		13/150	A,V,R,S		22	A	ALA:22:A	0.710	4*	-0.520, 1.574	7.3	e		13/26	V,A,R		22
23	S	SER:23:A	2.368	1	0.908, 3.024	4.1	e		45/150	S,A,C,L,G,M,V,N,T		23	S	SER:23:A	1.918	3	0.352, 2.509		5.3	e		17/23	A,S,T		23	A	ALA:23:A	0.708	4	-0.055, 1.391	5.3	e		14/150	A,C,M,Q		23	A	ALA:23:A	2.454	2	0.975, 4.327	4.1	e		13/26	A,T,S,W,M		23
24	A	ALA:24:A	2.551	1	0.908, 3.024	4.1	e		45/150	A,N,V,L,S,T,R,I,Q,P		24	A	ALA:24:A	0.659	4*	-0.371, 1.015		8.4	e		17/23	A,T		24	N	ASN:24:A	1.065	3	0.087, 1.391	5.3	e		14/150	N,A,V,P		24	N	ASN:24:A	0.762	4	-0.414, 1.574	6.3	e		13/26	A,C,N		24
25	D	ASP:25:A	2.772	1	1.457, 3.024	3.1	e		46/150	D,H,S,E,T,A,K,R,N,Q,V,P		25	D	ASP:25:A	2.907	2	0.633, 5.326		4.1	e		17/23	D,A,S		25	H	HIS:25:A	2.713	1	1.391, 2.973	3.1	e		14/150	H,D,S,V,N,A,P		25	H	HIS:25:A	2.414	2	0.975, 4.327	4.1	e		12/26	D,H,E,N		25
26	S	SER:26:A	2.345	2	0.908, 3.024	4.1	e		60/150	S,A,D,Q,K,E,N,R,T,V,I,G,P,C		26	S	SER:26:A	3.632	2	1.574, 5.326		4.1	e		17/23	S,A,V,L		26	S	SER:26:A	-0.051	5	-0.477, 0.268	8.5	e		13/150	S,A,Q		26	S	SER:26:A	0.720	4*	-0.520, 1.574	7.3	e		12/26	S,A,C		26
27	A	ALA:27:A	1.948	2	0.908, 3.024	4.1	e		62/150	A,S,G,T,K,N,R,C,D,Q,H,I,M,P		27	A	ALA:27:A	0.707	4*	-0.371, 1.015		8.4	e		17/23	A,S		27	A	ALA:27:A	0.994	3	0.087, 1.391	5.3	e		13/150	A,S,T,D		27	A	ALA:27:A	0.731	4*	-0.520, 1.574	7.3	e		13/26	A,C,S		27
28	A	ALA:28:A	1.505	3	0.570, 1.457	4.3	e		66/150	A,P,L,T,E,F,V,M,I,N		28	A	ALA:28:A	4.311	1	1.574, 5.326		4.1	e		17/23	A,V,S,R,P		28	A	ALA:28:A	0.433	4	-0.172, 0.843	6.4	e		13/150	A,T,V		28	A	ALA:28:A	1.412	3	0.074, 2.663	5.2	e		13/26	V,G,A,S		28
29	L	LEU:29:A	2.777	1	1.457, 3.024	3.1	e		44/150	L,V,P,A,M,I,T,Q		29	L	LEU:29:A	1.405	4*	-0.170, 2.509		7.3	e		17/23	L,A		29	L	LEU:29:A	2.485	1	0.843, 2.973	4.1	e		13/150	L,V,P,I,A,S		29	L	LEU:29:A	-0.582	7*	-1.514, -0.060	9.5	e		12/26	L		29
30	L	LEU:30:A	0.753	4	-0.003, 1.457	5.3	e		14/150	L,V,I,R		30	L	LEU:30:A	-0.382	8	-0.738, -0.371		9.8	e	f	17/23	L		30	L	LEU:30:A	0.948	4	0.087, 1.391	5.3	e		13/150	L,V,I,R		30	L	LEU:30:A	1.058	4*	-0.303, 2.008	6.2	e		13/26	M,L,V		30
31	G	GLY:31:A	1.626	3*	0.328, 3.024	5.1	e		13/150	G,L,S		31	G	GLY:31:A	2.119	3*	0.135, 5.326		5.1	e		17/23	G,L		31	G	GLY:31:A	1.556	3*	0.268, 2.973	5.1	e		13/150	G,L,S		31	G	GLY:31:A	1.225	3*	-0.186, 2.008	6.2	e		13/26	A,G,T		31
32	W	TRP:32:A	0.763	4	0.328, 0.908	5.4	e		48/150	W,R,G,A,K,Q,S,P		32	W	TRP:32:A	4.466	1	1.574, 5.326		4.1	e		17/23	W,R,T		32	R	ARG:32:A	1.723	2	0.506, 2.973	4.1	e		15/150	R,G,Q,K,V,L		32	R	ARG:32:A	1.190	3	-0.060, 2.008	5.2	e		15/26	R,Q,A		32
33	A	ALA:33:A	1.922	2	0.570, 3.024	4.1	e		16/150	A,G,D,T,S,H		33	A	ALA:33:A	0.762	4*	-0.371, 1.574		8.4	e		17/23	A,D		33	G	GLY:33:A	1.873	2	0.506, 2.973	4.1	e		16/150	G,A,D,T,E,Q		33	G	GLY:33:A	1.604	3	0.218, 2.663	5.2	e		15/26	K,A,T,S,G		33
34	R	ARG:34:A	2.453	1	0.908, 3.024	4.1	e		13/150	R,W,G,C,A,Q		34	R	ARG:34:A	0.874	4	-0.281, 1.574		7.4	e		17/23	R,G		34	R	ARG:34:A	2.606	1	1.391, 2.973	3.1	e		18/150	R,S,W,C,A,G		34	R	ARG:34:A	3.134	1	1.574, 4.327	3.1	e		15/26	P,R,A,C		34
35	G	GLY:35:A	1.063	3	-0.003, 1.457	5.3	e		12/150	G,P,Q		35	G	GLY:35:A	1.240	4	-0.170, 1.574		7.4	e		17/23	G,D		35	G	GLY:35:A	1.168	3	0.268, 1.391	5.3	e		21/150	G,P,A,Q		35	G	GLY:35:A	1.487	3	0.074, 2.663	5.2	e		15/26	G,A,V,W		35
36	Q	GLN:36:A	3.016	1	1.457, 3.024	3.1	e		61/150	Q,P,A,T,R,L,I,S,V,Y,C,H,E		36	Q	GLN:36:A	0.828	4	-0.281, 1.574		7.4	e		17/23	Q,R		36	Q	GLN:36:A	0.561	4	-0.055, 0.843	5.4	e		21/150	Q,P,L,H,R,E		36	Q	GLN:36:A	2.963	1	1.574, 4.327	3.1	e		15/26	S,Q,G,Y		36
37	P	PRO:37:A	2.720	1	1.457, 3.024	3.1	e		81/150	P,A,T,L,S,V,R,Q		37	P	PRO:37:A	2.602	3	0.633, 5.326		4.1	e		17/23	P,A,S		37	P	PRO:37:A	0.278	5	-0.349, 0.506	7.4	e		21/150	P,H,S		37	P	PRO:37:A	0.691	4*	-0.520, 1.574	7.3	e		15/26	P,A,H		37
38	A	ALA:38:A	2.939	1	1.457, 3.024	3.1	e		82/150	A,L,V,T,S,P,G,R,I,K,H,Q,M,C,N		38	A	ALA:38:A	-0.481	9	-0.738, -0.505		9.9	e	f	17/23	A		38	A	ALA:38:A	0.447	4	-0.172, 0.843	6.4	e		16/150	A,L,V		38	A	ALA:38:A	1.660	3	0.378, 2.663	5.2	e		15/26	R,A,S,P,V		38
39	A	ALA:39:A	2.773	1	1.457, 3.024	3.1	e		78/150	A,R,S,V,L,T,I,E,N,K,G,Q,H		39	A	ALA:39:A	0.662	4*	-0.371, 1.015		8.4	e		17/23	A,T		39	A	ALA:39:A	1.542	3	0.506, 2.973	4.1	e		18/150	A,R,S,V,T		39	A	ALA:39:A	3.202	1	1.574, 4.327	3.1	e		15/26	C,A,T,Q,P,V,I		39
40	A	ALA:40:A	3.023	1	1.457, 3.024	3.1	e		72/150	A,R,S,V,I,G,C,Q,W,T,D,L,F,N		40	A	ALA:40:A	2.243	3	0.352, 2.509		5.3	e		16/23	P,A,R		40	A	ALA:40:A	0.767	4	0.087, 1.391	5.3	e		18/150	A,R,S		40	A	ALA:40:A	0.551	4*	-0.621, 1.244	7.3	e		13/26	A,P,S		40
41	P	PRO:41:A	3.023	1	1.457, 3.024	3.1	e		44/150	P,S,R,A,H,Q,T,G,N,F,E,L,D		41	P	PRO:41:A	1.381	4*	-0.170, 2.509		7.3	e		17/23	P,G		41	S	SER:41:A	1.705	2	0.506, 2.973	4.1	e		9/150	S,P,R,A		41	S	SER:41:A	3.489	1	2.008, 4.327	2.1	e		11/26	V,L,H,P,S,T,X		41
42	Q	GLN:42:A	1.956	2	0.570, 3.024	4.1	e		10/150	Q,R,A,X,M,T,G		42	Q	GLN:42:A	1.356	4*	-0.170, 2.509		7.3	e		16/23	Q,R		42	Q	GLN:42:A	2.491	1	0.843, 2.973	4.1	e		14/150	Q,R,A,X,V,F,N,G		42	Q	GLN:42:A	0.804	4	-0.414, 1.574	6.3	e		12/26	P,Q,X		42
43	P	PRO:43:A	2.035	2	0.570, 3.024	4.1	e		13/150	P,Y,L,A,T,S		43	P	PRO:43:A	-0.308	8	-0.737, -0.281		9.7	e	f	16/23	P		43	P	PRO:43:A	2.891	1	1.391, 2.973	3.1	e		22/150	P,Y,L,H,Q,G,A,F,S,M		43	P	PRO:43:A	0.042	5*	-0.994, 0.749	8.4	e		14/26	P,A		43
44	G	GLY:44:A	2.788	1	1.457, 3.024	3.1	e		16/150	G,C,Q,L,K,M,W,T,N		44	G	GLY:44:A	-0.292	8	-0.737, -0.281		9.7	e	f	16/23	G		44	G	GLY:44:A	2.971	1	1.391, 2.973	3.1	e		33/150	G,C,V,Q,W,P,T,I,R,N,L,K		44	G	GLY:44:A	0.109	5*	-0.994, 0.749	8.4	e		14/26	G,A		44
45	L	LEU:45:A	3.019	1	1.457, 3.024	3.1	e		26/150	L,E,P,V,Q,H,N,A,M,S,Y,I		45	L	LEU:45:A	1.693	3	-0.034, 2.509		5.3	e		16/23	L,F		45	L	LEU:45:A	2.961	1	1.391, 2.973	3.1	e		40/150	L,E,S,P,H,Q,V,C,A,N,G,R,T,D		45	L	LEU:45:A	1.891	3	0.378, 2.663	5.2	e		14/26	L,T,S,V		45
46	A	ALA:46:A	3.002	1	1.457, 3.024	3.1	e		63/150	A,P,T,S,V,L,Q,M,C,R,F,E,I		46	A	ALA:46:A	2.863	2	0.633, 5.326		4.1	e		16/23	A,V		46	A	ALA:46:A	2.973	1	1.391, 2.973	3.1	e		81/150	A,P,T,S,V,L,I,H,W,K,N,Q,C,F,D,M,G,E		46	A	ALA:46:A	2.524	2	0.975, 4.327	4.1	e		14/26	V,A,P,T,S		46
47	L	LEU:47:A	3.024	1	1.457, 3.024	3.1	e		102/150	L,P,A,F,I,S,V,K,T,W,N,M,Q,H,G,C,D,E,R		47	L	LEU:47:A	1.109	4	-0.281, 1.574		7.4	e		17/23	L,P		47	L	LEU:47:A	2.964	1	1.391, 2.973	3.1	e		35/150	L,P,A,F,S,G,H,V,I,T,R,D		47	L	LEU:47:A	1.755	3	0.378, 2.663	5.2	e		14/26	P,L,R,T		47
48	A	ALA:48:A	3.024	1	1.457, 3.024	3.1	e		107/150	A,L,M,T,C,Q,S,I,R,N,E,P,G,V,K,F,Y,D		48	A	ALA:48:A	2.583	3	0.633, 5.326		4.1	e		17/23	A,P		48	A	ALA:48:A	2.973	1	1.391, 2.973	3.1	e		103/150	A,P,L,M,T,Q,I,C,R,N,E,G,S,V,K,F,Y,H,D		48	A	ALA:48:A	0.721	4*	-0.520, 1.574	7.3	e		14/26	P,A,S		48
49	A	ALA:49:A	1.968	2	0.908, 3.024	4.1	e		114/150	A,P,R,S,G,N,Q,W,V,C,I,T,L,Y,K		49	A	ALA:49:A	3.531	2	1.015, 5.326		4.1	e		17/23	A,G,P,T		49	A	ALA:49:A	2.909	1	1.391, 2.973	3.1	e		108/150	A,T,P,R,S,N,I,V,Q,W,C,M,L,K,Y,G,F		49	A	ALA:49:A	3.132	1	1.574, 4.327	3.1	e		14/26	A,S,G,T,I		49
50	R	ARG:50:A	3.024	1	1.457, 3.024	3.1	e		118/150	R,S,V,H,W,T,Q,A,N,Y,C,K,I,D,E,G,L,P		50	R	ARG:50:A	0.825	4	-0.281, 1.574		7.4	e		17/23	R,Q		50	R	ARG:50:A	2.973	1	1.391, 2.973	3.1	e		115/150	R,S,V,H,W,T,Q,A,P,N,K,C,Y,D,L,E,G,I		50	R	ARG:50:A	-0.177	6*	-1.168, 0.378	9.5	e		14/26	R,S		50
51	R	ARG:51:A	0.835	4	0.328, 0.908	5.4	e		123/150	R,S,G,Y,V,L,D,Q,P,N,T,A,I,M		51	R	ARG:51:A	-0.452	9	-0.738, -0.444		9.9	e	f	17/23	R		51	R	ARG:51:A	1.084	3	0.506, 1.391	4.3	e		117/150	R,S,Q,P,G,A,Y,V,L,D,N,T,M		51	R	ARG:51:A	-0.843	8	-1.699, -0.303	9.6	e	f	13/26	R		51
52	H	HIS:52:A	3.024	1	1.457, 3.024	3.1	e		125/150	H,S,R,G,A,L,Q,N,D,P,T,E,V,I,F,C		52	H	HIS:52:A	2.508	3	0.633, 5.326		4.1	e		17/23	H,Q,L		52	H	HIS:52:A	2.973	1	1.391, 2.973	3.1	e		123/150	H,S,R,G,A,L,Q,T,P,D,I,E,N,V,C,F		52	H	HIS:52:A	-0.147	6*	-1.168, 0.553	9.4	e		13/26	H,R		52
53	Y	TYR:53:A	3.024	1	1.457, 3.024	3.1	e		123/150	Y,S,F,A,I,L,C,H,N,G,T,W,V,P,D,Q,M		53	Y	TYR:53:A	-0.369	8	-0.737, -0.371		9.8	e	f	17/23	Y		53	Y	TYR:53:A	2.973	1	1.391, 2.973	3.1	e		126/150	Y,S,F,A,R,T,C,N,H,G,W,L,V,I,D,Q,M		53	Y	TYR:53:A	1.641	3	0.218, 2.663	5.2	e		14/26	Y,H,F		53
54	S	SER:54:A	0.429	4	0.143, 0.570	5.4	e		120/150	S,A,E,D,Y,C,Q,T,P,G,K,I,R		54	S	SER:54:A	-0.504	9	-0.738, -0.505		9.9	e	f	17/23	S		54	S	SER:54:A	0.907	4	0.506, 0.843	4.4	e		122/150	S,A,N,E,D,G,L,Y,Q,T,H,I,K,C		54	S	SER:54:A	-1.037	9	-1.801, -0.621	9.7	e	f	14/26	S		54
55	E	GLU:55:A	3.023	1	1.457, 3.024	3.1	e		117/150	E,S,D,Q,K,A,N,R,M,V,G,I,P,T,H,L		55	E	GLU:55:A	-0.436	9	-0.738, -0.444		9.9	e	f	17/23	E		55	E	GLU:55:A	2.973	1	1.391, 2.973	3.1	e		123/150	E,D,S,Q,K,A,I,L,N,R,Y,M,V,F,P,T,G		55	E	GLU:55:A	2.229	2	0.749, 4.327	4.1	e		14/26	E,K,R,S		55
56	A	ALA:56:A	1.424	3	0.908, 1.457	4.3	e		112/150	A,L,S,E,Q,H,D,G,V,K,R,T		56	A	ALA:56:A	-0.481	9	-0.738, -0.505		9.9	e	f	17/23	A		56	L	LEU:56:A	1.356	3	0.843, 1.391	4.3	e		118/150	L,A,S,E,K,H,Q,G,R,C,T,V,D,P		56	L	LEU:56:A	1.339	3	0.074, 2.008	5.2	e		14/26	A,L,E		56
57	V	VAL:57:A	1.521	3	0.908, 1.457	4.3	e		138/150	V,A,S,K,D,I,Y,H,T,G,E,Q,N,P		57	V	VAL:57:A	1.967	3	0.352, 2.509		5.3	e		17/23	V,A		57	V	VAL:57:A	1.381	3	0.843, 1.391	4.3	e		139/150	V,A,S,K,D,H,I,Q,Y,E,G,T,N,P		57	V	VAL:57:A	0.409	4*	-0.719, 1.244	7.3	e		14/26	A,V,T		57
58	A	ALA:58:A	1.344	3	0.908, 1.457	4.3	e		141/150	A,G,S,V,E,R,L,I,D,K,P,M,Q,H		58	A	ALA:58:A	0.837	4	-0.281, 1.574		7.4	e		17/23	A,G		58	A	ALA:58:A	1.261	3	0.843, 1.391	4.3	e		141/150	A,G,S,V,E,R,L,I,D,K,M,P,Q,H		58	A	ALA:58:A	-0.168	6*	-1.168, 0.553	9.4	e		13/26	A,R		58
59	D	ASP:59:A	2.978	1	1.457, 3.024	3.1	e		142/150	D,T,P,E,N,S,V,G,A,K,I,R,Q,H		59	D	ASP:59:A	2.789	2	0.633, 5.326		4.1	e		17/23	D,S,A		59	D	ASP:59:A	2.885	1	1.391, 2.973	3.1	e		142/150	D,T,P,N,E,S,G,V,A,I,K,R,Q,H		59	D	ASP:59:A	-0.080	5*	-1.082, 0.553	9.4	e		13/26	D,S		59
60	R	ARG:60:A	2.977	1	1.457, 3.024	3.1	e		142/150	R,K,Q,S,G,L,P,T,D,E,V,N,A,H		60	R	ARG:60:A	0.897	4	-0.281, 1.574		7.4	e		17/23	R,Y		60	R	ARG:60:A	2.874	1	1.391, 2.973	3.1	e		142/150	R,G,K,Q,S,L,P,T,D,E,N,V,A,H		60	R	ARG:60:A	1.531	3	0.074, 2.663	5.2	e		13/26	H,R,G,Q		60
61	E	GLU:61:A	1.635	3	0.908, 1.457	4.3	e		143/150	E,D,H,A,P,S,K,G,V,Q,N,T,R,L		61	E	GLU:61:A	-0.436	9	-0.738, -0.444		9.9	e	f	17/23	E		61	E	GLU:61:A	1.446	3	0.843, 1.391	4.3	e		143/150	E,D,P,A,S,H,K,G,V,Q,N,T,R,L		61	E	GLU:61:A	-0.030	5*	-1.082, 0.749	9.4	e		13/26	E,D		61
62	D	ASP:62:A	1.165	3	0.570, 1.457	4.3	b		144/150	D,A,E,P,K,L,S,Q,R,G		62	D	ASP:62:A	-0.453	9	-0.738, -0.444		9.9	b	s	17/23	D		62	D	ASP:62:A	1.219	3	0.506, 1.391	4.3	b		144/150	D,E,A,P,K,L,S,Q,R,G		62	D	ASP:62:A	-0.847	8	-1.699, -0.414	9.6	b		13/26	D		62
63	D	ASP:63:A	0.111	5	-0.124, 0.328	6.5	e		144/150	D,N,S,E,K,H,G		63	D	ASP:63:A	-0.453	9	-0.738, -0.444		9.9	e	f	17/23	D		63	D	ASP:63:A	0.070	5	-0.172, 0.268	6.5	e		144/150	D,N,S,E,K,H,G		63	D	ASP:63:A	-0.060	5*	-1.082, 0.553	9.4	e		13/26	D,N		63
64	P	PRO:64:A	-0.243	6	-0.447, -0.124	7.6	e		146/150	P,V,L,H,F,S		64	P	PRO:64:A	-0.399	9	-0.738, -0.371		9.8	e	f	17/23	P		64	P	PRO:64:A	-0.271	7	-0.477, -0.172	8.6	e		146/150	P,V,L,H,F,S		64	P	PRO:64:A	-0.711	7	-1.604, -0.186	9.6	e		13/26	P		64
65	N	ASN:65:A	0.484	4	0.143, 0.570	5.4	e		146/150	N,R,K,S,Y,L,E,A,G,D,T		65	N	ASN:65:A	-0.487	9	-0.738, -0.505		9.9	e	f	17/23	N		65	N	ASN:65:A	0.464	4	0.087, 0.506	5.4	e		146/150	N,I,R,K,S,Y,L,E,A,G,D,T		65	N	ASN:65:A	0.745	4	-0.414, 1.574	6.3	e		13/26	N,A,S		65
66	F	PHE:66:A	-0.757	9	-0.808, -0.734	9.9	b	s	146/150	F,L		66	F	PHE:66:A	-0.377	8	-0.737, -0.371		9.8	b		17/23	F		66	F	PHE:66:A	-0.742	9	-0.787, -0.716	9.9	b	s	146/150	F,L		66	F	PHE:66:A	-0.664	7*	-1.604, -0.060	9.5	b		13/26	F		66
67	F	PHE:67:A	-0.156	6	-0.384, -0.003	7.5	b		146/150	F,S,Y,T,N,C		67	F	PHE:67:A	-0.377	8	-0.737, -0.371		9.8	b		17/23	F		67	F	PHE:67:A	-0.185	6	-0.349, -0.055	7.5	b		146/150	F,Y,S,T,N,C		67	F	PHE:67:A	0.098	5*	-0.994, 0.749	8.4	b		14/26	F,S		67
68	K	LYS:68:A	1.258	3	0.570, 1.457	4.3	e		146/150	K,N,R,T,S,D,H,E,G,A,Q		68	K	LYS:68:A	0.936	4	-0.281, 1.574		7.4	e		17/23	K,N		68	K	LYS:68:A	1.049	3	0.506, 1.391	4.3	e		146/150	K,N,R,T,S,D,H,E,G,A,Q		68	K	LYS:68:A	-0.082	5*	-1.082, 0.553	9.4	e		14/26	K,R		68
69	M	MET:69:A	-0.628	8	-0.713, -0.592	9.8	b		149/150	M,T,N,Q,S		69	M	MET:69:A	-0.477	9	-0.738, -0.444		9.9	b	s	20/23	M		69	M	MET:69:A	-0.622	9	-0.696, -0.572	9.8	b	s	149/150	M,T,N,Q,S		69	M	MET:69:A	1.025	4*	-0.186, 2.008	6.2	b		17/26	M,T,Y,A		69
70	V	VAL:70:A	-0.753	9	-0.792, -0.734	9.9	b	s	150/150	V,I		70	V	VAL:70:A	-0.479	9	-0.738, -0.505		9.9	b	s	20/23	V		70	V	VAL:70:A	-0.738	9	-0.780, -0.716	9.9	b	s	150/150	V,I		70	V	VAL:70:A	-0.410	6*	-1.254, 0.218	9.5	b		17/26	V,I		70
71	E	GLU:71:A	-0.261	6	-0.447, -0.124	7.6	b		150/150	E,P,D,G		71	E	GLU:71:A	-0.437	9	-0.738, -0.444		9.9	b	s	20/23	E		71	E	GLU:71:A	-0.283	7	-0.477, -0.172	8.6	b		150/150	E,P,D,G		71	E	GLU:71:A	-0.164	6*	-1.168, 0.553	9.4	b		16/26	E,D		71
72	G	GLY:72:A	0.432	4	0.143, 0.570	5.4	e		150/150	G,Y,F,A,L,E,M,D,V,K,N,R		72	G	GLY:72:A	-0.380	8	-0.738, -0.371		9.8	e	f	20/23	G		72	G	GLY:72:A	0.365	4	0.087, 0.506	5.4	e		150/150	G,Y,F,A,L,E,M,D,K,V,N,R		72	G	GLY:72:A	2.515	2	0.975, 4.327	4.1	e		17/26	G,D,I,S		72
73	F	PHE:73:A	-0.657	9	-0.734, -0.592	9.8	b	s	150/150	F,N,Y		73	F	PHE:73:A	-0.377	8	-0.737, -0.371		9.8	b		20/23	F		73	F	PHE:73:A	-0.649	9	-0.734, -0.610	9.8	b	s	150/150	F,N,Y		73	F	PHE:73:A	0.032	5*	-0.994, 0.749	8.4	b		17/26	I,F		73
74	F	PHE:74:A	-0.353	7	-0.502, -0.225	8.6	b		150/150	F,Y,V,L		74	F	PHE:74:A	-0.377	8	-0.737, -0.371		9.8	b		20/23	F		74	F	PHE:74:A	-0.321	7	-0.477, -0.268	8.7	b		150/150	F,Y,V,L		74	F	PHE:74:A	1.809	3	0.378, 2.663	5.2	b		17/26	R,F,L		74
75	D	ASP:75:A	-0.592	8	-0.689, -0.550	9.8	e	f	150/150	D,H,E,N		75	D	ASP:75:A	-0.454	9	-0.738, -0.444		9.9	e	f	20/23	D		75	D	ASP:75:A	-0.566	8	-0.671, -0.528	9.8	e	f	150/150	D,H,E,N		75	D	ASP:75:A	-0.174	6*	-1.168, 0.378	9.5	e		17/26	R,D		75
76	R	ARG:76:A	-0.065	5	-0.310, -0.003	7.5	e		150/150	R,N,K		76	R	ARG:76:A	-0.452	9	-0.738, -0.444		9.9	e	f	20/23	R		76	R	ARG:76:A	-0.099	6	-0.268, -0.055	7.5	e		150/150	R,N,K		76	R	ARG:76:A	-0.276	6*	-1.168, 0.378	9.5	e		17/26	R,C		76
77	G	GLY:77:A	-0.049	5	-0.310, 0.143	7.5	b		150/150	G,A,S		77	G	GLY:77:A	-0.380	8	-0.738, -0.371		9.8	b		20/23	G		77	G	GLY:77:A	-0.095	6	-0.349, 0.087	7.5	b		150/150	G,A,S		77	G	GLY:77:A	-0.011	5*	-1.082, 0.749	9.4	b		17/26	G,S		77
78	A	ALA:78:A	-0.315	7	-0.502, -0.225	8.6	b		150/150	A,S,C,V,W,I,T		78	A	ALA:78:A	-0.482	9	-0.738, -0.505		9.9	b	s	20/23	A		78	A	ALA:78:A	-0.333	7	-0.477, -0.268	8.7	b		150/150	A,S,C,V,W,I,T		78	A	ALA:78:A	1.135	4	-0.060, 2.008	5.2	b		17/26	T,A,I		78
79	S	SER:79:A	1.040	3	0.570, 1.457	4.3	e		150/150	S,K,G,T,A,R,Q,I,M,V,N,E,C,D		79	S	SER:79:A	-0.505	9	-0.738, -0.505		9.9	e	f	20/23	S		79	S	SER:79:A	0.848	4	0.506, 0.843	4.4	e		150/150	S,K,G,T,A,R,Q,I,M,V,E,N,C,D		79	S	SER:79:A	0.084	5*	-0.905, 0.749	8.4	e		17/26	P,S,G		79
80	I	ILE:80:A	0.512	4	0.143, 0.570	5.4	e		150/150	I,M,V,L,C,A,T,Y		80	I	ILE:80:A	-0.483	9	-0.738, -0.505		9.9	e	f	20/23	I		80	I	ILE:80:A	0.450	4	0.087, 0.506	5.4	e		150/150	I,M,V,L,C,A,T,Y		80	I	ILE:80:A	0.241	5*	-0.814, 0.975	8.4	e		17/26	T,I,L		80
81	V	VAL:81:A	0.256	5	-0.003, 0.328	5.5	b		150/150	V,M,L,A,C,I,S		81	V	VAL:81:A	-0.479	9	-0.738, -0.505		9.9	b	s	20/23	V		81	V	VAL:81:A	0.200	5	-0.055, 0.268	5.5	b		150/150	V,M,A,L,C,I,S		81	V	VAL:81:A	-0.397	6*	-1.254, 0.218	9.5	b		17/26	V,M		81
82	E	GLU:82:A	-0.518	8	-0.629, -0.447	8.7	b		150/150	E,Q,K,M,G		82	E	GLU:82:A	-0.437	9	-0.738, -0.444		9.9	b	s	20/23	E		82	E	GLU:82:A	-0.521	8	-0.643, -0.477	9.8	b		150/150	E,Q,K,M,G		82	E	GLU:82:A	0.512	4*	-0.621, 1.244	7.3	b		17/26	A,E,G		82
83	D	ASP:83:A	0.225	5	-0.124, 0.328	6.5	e		150/150	D,N,E,S,P		83	D	ASP:83:A	-0.454	9	-0.738, -0.444		9.9	e	f	20/23	D		83	D	ASP:83:A	0.164	5	-0.055, 0.268	5.5	e		150/150	D,N,S,E,P		83	D	ASP:83:A	-0.219	6*	-1.168, 0.378	9.5	e		17/26	T,D		83
84	K	LYS:84:A	0.657	4	0.328, 0.908	5.4	e		150/150	K,Q,R,H,S,N,T,P		84	K	LYS:84:A	-0.431	9	-0.738, -0.444		9.9	e	f	20/23	K		84	K	LYS:84:A	0.605	4	0.268, 0.843	5.4	e		150/150	K,Q,R,H,S,N,T,P		84	K	LYS:84:A	-0.092	5*	-1.082, 0.553	9.4	e		17/26	P,K		84
85	L	LEU:85:A	-0.607	8	-0.713, -0.550	9.8	b		150/150	L,M,F		85	L	LEU:85:A	-0.383	8	-0.738, -0.371		9.8	b		20/23	L		85	L	LEU:85:A	-0.604	8	-0.696, -0.528	9.8	b		150/150	L,M,F		85	L	LEU:85:A	0.067	5*	-0.994, 0.749	8.4	b		17/26	A,L		85
86	V	VAL:86:A	-0.399	7	-0.550, -0.310	8.7	b		150/150	V,L,M,I,R,A		86	V	VAL:86:A	-0.479	9	-0.738, -0.505		9.9	b	s	20/23	V		86	V	VAL:86:A	-0.438	7	-0.572, -0.349	8.7	b		150/150	V,M,L,I,R,A		86	V	VAL:86:A	-0.388	6*	-1.254, 0.218	9.5	b		17/26	L,V		86
87	E	GLU:87:A	1.077	3	0.570, 1.457	4.3	e		150/150	E,K,H,Q,A,D,R,C,S,G		87	E	GLU:87:A	-0.437	9	-0.738, -0.444		9.9	e	f	20/23	E		87	K	LYS:87:A	1.026	3	0.506, 1.391	4.3	e		150/150	K,E,H,Q,A,D,C,R,S,G		87	K	LYS:87:A	1.341	3	0.074, 2.008	5.2	e		17/26	W,E,A,K		87
88	D	ASP:88:A	1.288	3	0.570, 1.457	4.3	e		150/150	D,G,S,E,A,N,T,K,Q,L		88	D	ASP:88:A	-0.454	9	-0.738, -0.444		9.9	e	f	20/23	D		88	D	ASP:88:A	1.109	3	0.506, 1.391	4.3	e		150/150	D,G,E,S,A,N,T,K,Q,L		88	D	ASP:88:A	1.147	4	-0.060, 2.008	5.2	e		19/26	D,L,F,G		88
89	L	LEU:89:A	0.557	4	0.143, 0.570	5.4	b		150/150	L,M,V,I,W,F,Y		89	L	LEU:89:A	-0.383	8	-0.738, -0.371		9.8	b		20/23	L		89	L	LEU:89:A	0.465	4	0.087, 0.506	5.4	b		150/150	L,M,V,I,W,F,Y		89	L	LEU:89:A	1.931	3	0.553, 2.663	4.2	b		19/26	T,L,S,I,V		89
90	R	ARG:90:A	0.790	4	0.328, 0.908	5.4	e		150/150	R,K,A,S,P,H,G,D		90	R	ARG:90:A	4.414	1	1.574, 5.326		4.1	e		20/23	R,K		90	R	ARG:90:A	0.677	4	0.268, 0.843	5.4	e		150/150	R,K,A,S,P,H,G,D		90	R	ARG:90:A	1.161	4	-0.060, 2.008	5.2	e		19/26	R,K,N		90
91	T	THR:91:A	1.306	3	0.570, 1.457	4.3	e		149/150	T,N,S,G,E,A,P,H,D,I,M,Q,K,V		91	T	THR:91:A	-0.493	9	-0.738, -0.505		9.9	e	f	20/23	T		91	T	THR:91:A	1.199	3	0.506, 1.391	4.3	e		149/150	T,N,S,G,E,A,P,H,D,I,M,Q,K,V		91	T	THR:91:A	-0.002	5*	-0.905, 0.553	8.4	e		18/26	T,S,I		91
92	R	ARG:92:A	0.926	4	0.570, 0.908	4.4	e		150/150	R,Q,K,H,P,S,N,L,T		92	R	ARG:92:A	-0.452	9	-0.738, -0.444		9.9	e	f	20/23	R		92	Q	GLN:92:A	0.854	4	0.506, 0.843	4.4	e		150/150	Q,R,K,H,P,S,N,L,T		92	Q	GLN:92:A	1.690	3	0.378, 2.663	5.2	e		18/26	R,S,Q,P		92
93	E	GLU:93:A	1.359	3	0.908, 1.457	4.3	e		150/150	E,D,M,I,L,V,S,A,T,G,Q,K,H		93	E	GLU:93:A	-0.437	9	-0.738, -0.444		9.9	e	f	20/23	E		93	E	GLU:93:A	1.277	3	0.843, 1.391	4.3	e		150/150	E,D,M,L,I,S,V,A,T,G,Q,K,H		93	E	GLU:93:A	1.842	3	0.378, 2.663	5.2	e		18/26	E,Q,G,D		93
94	S	SER:94:A	0.840	4	0.328, 0.908	5.4	e		150/150	S,T,N,P,D		94	S	SER:94:A	0.532	4*	-0.371, 1.015		8.4	e		20/23	S,T		94	S	SER:94:A	0.772	4	0.268, 0.843	5.4	e		150/150	S,T,N,P,D		94	S	SER:94:A	0.570	4*	-0.520, 1.244	7.3	e		18/26	T,S,C,A		94
95	E	GLU:95:A	3.024	1	1.457, 3.024	3.1	e		150/150	E,D,P,Q,A,L,I,V,T,M,R,S,K,N,H		95	E	GLU:95:A	2.521	3	0.633, 5.326		4.1	e		20/23	E,A		95	E	GLU:95:A	2.973	1	1.391, 2.973	3.1	e		150/150	E,D,P,Q,A,L,I,V,T,M,R,S,K,N,H		95	E	GLU:95:A	1.244	3	-0.060, 2.008	5.2	e		17/26	E,D,A,K		95
96	E	GLU:96:A	0.861	4	0.328, 0.908	5.4	e		150/150	E,D,R,A,N,V,Q		96	E	GLU:96:A	0.866	4	-0.281, 1.574		7.4	e		20/23	E,D		96	E	GLU:96:A	0.743	4	0.268, 0.843	5.4	e		150/150	E,D,R,A,N,Q,V		96	E	GLU:96:A	0.526	4*	-0.621, 1.244	7.3	e		17/26	E,V,D		96
97	Q	GLN:97:A	0.825	4	0.328, 0.908	5.4	e		150/150	Q,E,D,N,R,A,T,V,M		97	Q	GLN:97:A	-0.457	9	-0.738, -0.444		9.9	e	f	20/23	Q		97	Q	GLN:97:A	0.734	4	0.268, 0.843	5.4	e		150/150	Q,E,D,N,R,A,T,V,M		97	Q	GLN:97:A	-0.964	8	-1.699, -0.520	9.7	e	f	17/26	Q		97
98	K	LYS:98:A	-0.242	6	-0.447, -0.124	7.6	b		150/150	K,R,P,Q		98	K	LYS:98:A	-0.431	9	-0.738, -0.444		9.9	b	s	20/23	K		98	K	LYS:98:A	-0.295	7	-0.477, -0.172	8.6	b		150/150	K,R,P,Q		98	K	LYS:98:A	1.412	3	0.074, 2.663	5.2	b		18/26	K,P,R		98
99	R	ARG:99:A	1.156	3	0.570, 1.457	4.3	e		150/150	R,M,K,Q,T,Y,A,V,H,L,N		99	R	ARG:99:A	-0.452	9	-0.738, -0.444		9.9	e	f	20/23	R		99	R	ARG:99:A	1.007	3	0.506, 1.391	4.3	e		150/150	R,M,K,Q,T,A,Y,V,H,L,N		99	R	ARG:99:A	1.039	4*	-0.186, 2.008	6.2	e		18/26	Q,R,N		99
100	N	ASN:100:A	1.481	3	0.908, 1.457	4.3	e		150/150	N,H,S,V,K,G,L,T,D,R,E,A,Q,I		100	N	ASN:100:A	-0.488	9	-0.738, -0.505		9.9	e	f	20/23	N		100	N	ASN:100:A	1.348	3	0.843, 1.391	4.3	e		150/150	N,L,H,S,K,G,T,D,R,E,A,Q,I		100	N	ASN:100:A	1.789	3	0.378, 2.663	5.2	e		18/26	N,A,K,L,D		100
101	R	ARG:101:A	0.025	5	-0.225, 0.143	6.5	e		150/150	R,T,K,W,Q,V,I		101	R	ARG:101:A	-0.452	9	-0.738, -0.444		9.9	e	f	20/23	R		101	R	ARG:101:A	0.002	5	-0.268, 0.087	7.5	e		150/150	R,T,K,W,Q,V,I		101	R	ARG:101:A	1.003	4*	-0.186, 2.008	6.2	e		18/26	R,Q,W,C		101
102	V	VAL:102:A	-0.598	8	-0.689, -0.550	9.8	b		150/150	V,T,M,A,I		102	V	VAL:102:A	-0.479	9	-0.738, -0.505		9.9	b	s	20/23	V		102	V	VAL:102:A	-0.595	8	-0.671, -0.528	9.8	b		150/150	V,T,M,A,I		102	V	VAL:102:A	1.046	4*	-0.186, 2.008	6.2	b		17/26	V,L,G,M		102
103	R	ARG:103:A	0.801	4	0.328, 0.908	5.4	e		150/150	R,K,A,Q,H,C,N,E		103	R	ARG:103:A	-0.452	9	-0.738, -0.444		9.9	e	f	20/23	R		103	R	ARG:103:A	0.713	4	0.268, 0.843	5.4	e		150/150	R,A,K,Q,H,C,N,E,D		103	R	ARG:103:A	1.252	3	-0.060, 2.008	5.2	e		17/26	R,V,H,C		103
104	G	GLY:104:A	-0.644	9	-0.752, -0.592	9.8	e	f	150/150	G,A,N		104	G	GLY:104:A	-0.380	8	-0.738, -0.371		9.8	e	f	20/23	G		104	G	GLY:104:A	-0.638	9	-0.734, -0.572	9.8	e	f	150/150	G,A,N		104	G	GLY:104:A	-0.760	8	-1.604, -0.186	9.6	e	f	17/26	G		104
105	I	ILE:105:A	-0.693	9	-0.752, -0.661	9.9	b	s	150/150	I,L,Y		105	I	ILE:105:A	-0.483	9	-0.738, -0.505		9.9	b	s	20/23	I		105	I	ILE:105:A	-0.682	9	-0.734, -0.643	9.9	b	s	150/150	I,L,Y		105	I	ILE:105:A	-0.422	6*	-1.254, 0.074	9.5	b		17/26	I,V		105
106	L	LEU:106:A	-0.608	8	-0.713, -0.550	9.8	b		150/150	L,M,F,I		106	L	LEU:106:A	-0.383	8	-0.738, -0.371		9.8	b		20/23	L		106	L	LEU:106:A	-0.604	8	-0.696, -0.572	9.8	b		150/150	L,M,F,I		106	L	LEU:106:A	-0.097	5*	-1.082, 0.553	9.4	b		19/26	M,L		106
107	R	ARG:107:A	1.341	3	0.908, 1.457	4.3	e		150/150	R,K,M,H,L,A,N,Q,G,I,T,S,E		107	R	ARG:107:A	-0.452	9	-0.738, -0.444		9.9	e	f	20/23	R		107	R	ARG:107:A	1.243	3	0.506, 1.391	4.3	e		150/150	R,K,M,L,H,A,N,I,G,Q,T,S,E		107	R	ARG:107:A	1.757	3	0.378, 2.663	5.2	e		19/26	R,P,G,H,Q		107
108	I	ILE:108:A	0.375	4	-0.003, 0.570	5.4	e		150/150	I,V,M,L,G,S,Y,H,C,T,F		108	I	ILE:108:A	-0.483	9	-0.738, -0.505		9.9	e	f	20/23	I		108	I	ILE:108:A	0.316	5	-0.055, 0.506	5.4	e		150/150	I,V,L,G,M,S,Y,H,C,T,F		108	I	ILE:108:A	0.246	5*	-0.814, 0.975	8.4	e		19/26	I,A,V		108
109	I	ILE:109:A	-0.376	7	-0.502, -0.310	8.7	b		150/150	I,M,V,L		109	I	ILE:109:A	-0.483	9	-0.738, -0.505		9.9	b	s	20/23	I		109	I	ILE:109:A	-0.409	7	-0.528, -0.349	8.7	b		150/150	I,M,V,L		109	I	ILE:109:A	0.807	4	-0.303, 1.574	6.3	b		19/26	T,L,I		109
110	K	LYS:110:A	-0.478	8	-0.592, -0.384	8.7	e	f	150/150	K,E,Q,G,R		110	K	LYS:110:A	-0.431	9	-0.738, -0.444		9.9	e	f	20/23	K		110	K	LYS:110:A	-0.482	8	-0.610, -0.418	8.7	e	f	150/150	K,E,Q,G,R		110	K	LYS:110:A	0.666	4*	-0.520, 1.574	7.3	e		20/26	K,P,D		110
111	P	PRO:111:A	-0.043	5	-0.310, 0.143	7.5	e		150/150	P,N,Q,H,E,G,T,K		111	P	PRO:111:A	-0.399	9	-0.738, -0.371		9.8	e	f	20/23	P		111	P	PRO:111:A	-0.082	5	-0.349, 0.087	7.5	e		150/150	P,N,Q,H,E,G,T,K		111	P	PRO:111:A	-0.922	8	-1.699, -0.414	9.6	e	f	20/26	P		111
112	C	CYS:112:A	-0.667	9	-0.752, -0.629	9.8	b	s	150/150	C,V,P		112	C	CYS:112:A	-0.361	8	-0.737, -0.371		9.8	b		20/23	C		112	C	CYS:112:A	-0.658	9	-0.734, -0.610	9.8	b	s	150/150	C,V,P		112	C	CYS:112:A	0.069	5*	-0.994, 0.749	8.4	b		19/26	C,T		112
113	N	ASN:113:A	-0.321	7	-0.502, -0.225	8.6	e		150/150	N,S,D,H,Q,A		113	N	ASN:113:A	-0.488	9	-0.738, -0.505		9.9	e	f	20/23	N		113	N	ASN:113:A	-0.339	7	-0.477, -0.268	8.7	e		150/150	N,D,S,H,Q,A		113	N	ASN:113:A	-0.604	7*	-1.426, -0.060	9.5	e		19/26	N,D		113
114	H	HIS:114:A	-0.157	6	-0.310, -0.003	7.5	e		150/150	H,Q,T,S,N,A,Y,C		114	H	HIS:114:A	-0.471	9	-0.738, -0.444		9.9	e	f	20/23	H		114	H	HIS:114:A	-0.149	6	-0.349, -0.055	7.5	e		150/150	H,Q,T,S,N,A,Y,C		114	H	HIS:114:A	0.217	5*	-0.814, 0.975	8.4	e		19/26	H,T,Q		114
115	V	VAL:115:A	-0.246	6	-0.384, -0.124	7.6	e		150/150	V,I,L,A,M,T		115	V	VAL:115:A	-0.479	9	-0.738, -0.505		9.9	e	f	20/23	V		115	V	VAL:115:A	-0.271	7	-0.418, -0.172	7.6	e		150/150	V,I,L,A,M,T		115	V	VAL:115:A	-0.516	7*	-1.341, 0.074	9.5	e		19/26	V,C		115
116	L	LEU:116:A	0.296	5	-0.003, 0.570	5.4	b		150/150	L,R,I,F,M,C,V		116	L	LEU:116:A	-0.383	8	-0.738, -0.371		9.8	b		20/23	L		116	L	LEU:116:A	0.298	5	-0.055, 0.506	5.4	b		150/150	L,I,R,F,M,C,V		116	L	LEU:116:A	-0.110	5*	-1.082, 0.553	9.4	b		19/26	L,H		116
117	S	SER:117:A	-0.182	6	-0.384, -0.124	7.6	e		150/150	S,A,Q,E,N,K		117	S	SER:117:A	-0.505	9	-0.738, -0.505		9.9	e	f	20/23	S		117	S	SER:117:A	-0.183	6	-0.349, -0.055	7.5	e		150/150	S,Q,A,E,N,K		117	S	SER:117:A	-0.695	7	-1.426, -0.186	9.6	e		19/26	S,N		117
118	L	LEU:118:A	0.724	4	0.328, 0.908	5.4	b		150/150	L,V,T,I,M,F		118	L	LEU:118:A	1.262	4*	-0.170, 2.509		7.3	b		20/23	L,V		118	L	LEU:118:A	0.675	4	0.268, 0.843	5.4	b		150/150	L,V,T,I,M,F		118	L	LEU:118:A	1.373	3	0.074, 2.663	5.2	b		19/26	L,P,V		118
119	S	SER:119:A	1.027	3	0.570, 1.457	4.3	e		150/150	S,T,C,N,A,Q,H,V,G,R		119	S	SER:119:A	1.758	3	0.135, 2.509		5.3	e		20/23	S,C,T		119	S	SER:119:A	0.892	4	0.506, 0.843	4.4	e		150/150	S,T,C,N,A,Q,H,V,G,R		119	S	SER:119:A	2.199	2	0.749, 4.327	4.1	e		20/26	S,A,P,T,C		119
120	F	PHE:120:A	-0.757	9	-0.808, -0.734	9.9	b	s	150/150	F,Y		120	F	PHE:120:A	-0.377	8	-0.737, -0.371		9.8	b		20/23	F		120	F	PHE:120:A	-0.742	9	-0.787, -0.716	9.9	b	s	150/150	F,Y		120	F	PHE:120:A	0.636	4*	-0.520, 1.574	7.3	b		20/26	F,L,P		120
121	P	PRO:121:A	-0.699	9	-0.792, -0.661	9.9	e	f	150/150	P,S		121	P	PRO:121:A	-0.399	9	-0.738, -0.371		9.8	e	f	20/23	P		121	P	PRO:121:A	-0.690	9	-0.772, -0.643	9.9	e	f	150/150	P,S		121	P	PRO:121:A	0.435	4*	-0.621, 1.244	7.3	e		20/26	P,S		121
122	I	ILE:122:A	-0.019	5	-0.225, 0.143	6.5	b		150/150	I,V,L		122	I	ILE:122:A	-0.483	9	-0.738, -0.505		9.9	b	s	20/23	I		122	I	ILE:122:A	-0.056	5	-0.268, 0.087	7.5	b		150/150	I,V,L		122	I	ILE:122:A	0.239	5*	-0.814, 0.975	8.4	b		19/26	I,Q,V		122
123	R	ARG:123:A	0.251	5	-0.003, 0.328	5.5	e		150/150	R,K,L,Q		123	R	ARG:123:A	0.836	4	-0.281, 1.574		7.4	e		20/23	R,K		123	R	ARG:123:A	0.241	5	-0.055, 0.268	5.5	e		150/150	R,K,L,Q		123	R	ARG:123:A	1.004	4*	-0.186, 2.008	6.2	e		19/26	R,Q,K		123
124	R	ARG:124:A	-0.436	7	-0.592, -0.384	8.7	e		150/150	R,K,L,H		124	R	ARG:124:A	-0.452	9	-0.738, -0.444		9.9	e	f	20/23	R		124	R	ARG:124:A	-0.447	8	-0.572, -0.349	8.7	e	f	150/150	R,K,L,H		124	R	ARG:124:A	1.812	3	0.378, 2.663	5.2	e		19/26	R,L,H		124
125	D	ASP:125:A	-0.806	9	-0.823, -0.801	9.9	e	f	150/150	D		125	D	ASP:125:A	-0.454	9	-0.738, -0.444		9.9	e	f	20/23	D		125	D	ASP:125:A	-0.787	9	-0.801, -0.787	9.9	e	f	150/150	D		125	D	ASP:125:A	0.953	4	-0.186, 1.574	6.3	e		19/26	Y,E,D,N		125
126	D	ASP:126:A	0.307	5	-0.003, 0.328	5.5	e		150/150	D,N,G,C,S,T,H,A		126	D	ASP:126:A	-0.454	9	-0.738, -0.444		9.9	e	f	20/23	D		126	D	ASP:126:A	0.233	5	-0.055, 0.268	5.5	e		150/150	D,N,G,C,S,T,H,A		126	D	ASP:126:A	0.322	5	-0.719, 0.975	7.4	e		19/26	D,G,S		126
127	G	GLY:127:A	-0.795	9	-0.823, -0.792	9.9	e	f	150/150	G		127	G	GLY:127:A	-0.380	8	-0.738, -0.371		9.8	e	f	20/23	G		127	G	GLY:127:A	-0.778	9	-0.801, -0.772	9.9	e	f	150/150	G		127	G	GLY:127:A	0.023	5*	-1.082, 0.749	9.4	e		19/26	G,P		127
128	S	SER:128:A	1.276	3	0.570, 1.457	4.3	e		150/150	S,A,E,D,N,T,C,V,Q,R,Z,K		128	S	SER:128:A	-0.505	9	-0.738, -0.505		9.9	e	f	20/23	S		128	S	SER:128:A	1.164	3	0.506, 1.391	4.3	e		150/150	S,A,E,D,N,T,C,V,Q,R,Z,K		128	S	SER:128:A	-0.620	7*	-1.426, -0.060	9.5	e		19/26	S,C		128
129	W	TRP:129:A	0.389	4	-0.003, 0.570	5.4	e		150/150	W,Y,F,I,V,L		129	W	TRP:129:A	-0.276	7	-0.737, -0.281		9.7	e		20/23	W		129	W	TRP:129:A	0.301	5	-0.055, 0.506	5.4	e		150/150	W,Y,F,I,V,L		129	W	TRP:129:A	0.309	5*	-0.905, 0.975	8.4	e		18/26	W,R,X		129
130	E	GLU:130:A	-0.436	7	-0.592, -0.384	8.7	e		150/150	E,D,V,T,C,H,Q		130	E	GLU:130:A	-0.437	9	-0.738, -0.444		9.9	e	f	20/23	E		130	E	GLU:130:A	-0.443	8	-0.572, -0.349	8.7	e	f	150/150	E,D,V,T,C,H,Q		130	E	GLU:130:A	-0.240	6*	-1.168, 0.378	9.5	e		18/26	E,K		130
131	V	VAL:131:A	0.068	5	-0.124, 0.143	6.5	e		150/150	V,M,L,I,N,T		131	V	VAL:131:A	-0.479	9	-0.738, -0.505		9.9	e	f	20/23	V		131	V	VAL:131:A	0.036	5	-0.172, 0.087	6.5	e		150/150	V,M,L,I,N,T		131	V	VAL:131:A	-1.072	9	-1.801, -0.621	9.7	e	f	18/26	V		131
132	I	ILE:132:A	-0.612	8	-0.689, -0.550	9.8	b		150/150	I,V		132	I	ILE:132:A	-0.483	9	-0.738, -0.505		9.9	b	s	20/23	I		132	I	ILE:132:A	-0.634	9	-0.696, -0.610	9.8	b	s	150/150	I,V		132	I	ILE:132:A	-1.166	9	-1.801, -0.814	9.8	b	s	19/26	I		132
133	E	GLU:133:A	0.403	4	0.143, 0.570	5.4	e		150/150	E,Q,T,H,L,V,N,R,K,S,Y,D		133	E	GLU:133:A	-0.437	9	-0.738, -0.444		9.9	e	f	20/23	E		133	E	GLU:133:A	0.329	5	0.087, 0.506	5.4	e		150/150	E,Q,T,L,H,V,R,N,K,S,D,Y		133	E	GLU:133:A	0.660	4*	-0.520, 1.574	7.3	e		19/26	E,P,H		133
134	G	GLY:134:A	0.045	5	-0.225, 0.143	6.5	b		149/150	G,A,C		134	G	GLY:134:A	-0.380	8	-0.738, -0.371		9.8	b		20/23	G		134	G	GLY:134:A	0.063	5	-0.172, 0.268	6.5	b		149/150	G,A,C		134	G	GLY:134:A	-0.855	8	-1.699, -0.414	9.6	b		19/26	G		134
135	Y	TYR:135:A	-0.073	5	-0.310, -0.003	7.5	b		149/150	Y,V,W,F,H		135	Y	TYR:135:A	-0.369	8	-0.737, -0.371		9.8	b		20/23	Y		135	Y	TYR:135:A	-0.107	6	-0.349, 0.087	7.5	b		149/150	Y,V,W,F,H		135	Y	TYR:135:A	1.612	3	0.218, 2.663	5.2	b		19/26	H,Y,R,C		135
136	R	ARG:136:A	-0.807	9	-0.823, -0.801	9.9	b	s	149/150	R		136	R	ARG:136:A	-0.452	9	-0.738, -0.444		9.9	b	s	20/23	R		136	R	ARG:136:A	-0.788	9	-0.801, -0.787	9.9	b	s	149/150	R		136	R	ARG:136:A	-1.064	9	-1.801, -0.621	9.7	b	s	19/26	R		136
137	A	ALA:137:A	-0.665	9	-0.734, -0.629	9.8	b	s	149/150	A,S		137	A	ALA:137:A	-0.482	9	-0.738, -0.505		9.9	b	s	20/23	A		137	A	ALA:137:A	-0.657	9	-0.734, -0.610	9.8	b	s	149/150	A,S		137	A	ALA:137:A	0.001	5*	-0.905, 0.553	8.4	b		19/26	A,T		137
138	Q	GLN:138:A	-0.811	9	-0.824, -0.808	9.9	b	s	149/150	Q		138	Q	GLN:138:A	-0.457	9	-0.738, -0.444		9.9	b	s	20/23	Q		138	Q	GLN:138:A	-0.792	9	-0.801, -0.792	9.9	b	s	149/150	Q		138	Q	GLN:138:A	-0.373	6*	-1.254, 0.218	9.5	b		19/26	Q,T		138
139	H	HIS:139:A	-0.810	9	-0.823, -0.808	9.9	b	s	149/150	H		139	H	HIS:139:A	-0.471	9	-0.738, -0.444		9.9	b	s	20/23	H		139	H	HIS:139:A	-0.790	9	-0.801, -0.787	9.9	b	s	149/150	H		139	H	HIS:139:A	-0.306	6*	-1.254, 0.218	9.5	b		19/26	H,E		139
140	S	SER:140:A	-0.729	9	-0.781, -0.689	9.9	b	s	149/150	S,C,N		140	S	SER:140:A	-0.505	9	-0.738, -0.505		9.9	b	s	20/23	S		140	S	SER:140:A	-0.715	9	-0.761, -0.696	9.9	b	s	149/150	S,C,N		140	S	SER:140:A	-0.666	7	-1.426, -0.186	9.6	b		19/26	S,P		140
141	Q	GLN:141:A	-0.187	6	-0.384, -0.124	7.6	e		149/150	Q,T,L,S,A,H,G,N		141	Q	GLN:141:A	-0.457	9	-0.738, -0.444		9.9	e	f	20/23	Q		141	Q	GLN:141:A	-0.213	6	-0.349, -0.172	7.6	e		149/150	Q,T,L,S,A,H,G,N		141	Q	GLN:141:A	0.248	5*	-0.814, 0.975	8.4	e		20/26	Q,A,M		141
142	H	HIS:142:A	-0.774	9	-0.808, -0.752	9.9	b	s	149/150	H,Q		142	H	HIS:142:A	-0.471	9	-0.738, -0.444		9.9	b	s	20/23	H		142	H	HIS:142:A	-0.757	9	-0.792, -0.734	9.9	b	s	149/150	H,Q		142	H	HIS:142:A	-0.555	7*	-1.341, -0.060	9.5	b		20/26	H,Q		142
143	R	ARG:143:A	-0.629	8	-0.713, -0.592	9.8	e	f	149/150	R,C,K		143	R	ARG:143:A	-0.452	9	-0.738, -0.444		9.9	e	f	20/23	R		143	R	ARG:143:A	-0.581	8	-0.671, -0.528	9.8	e	f	149/150	R,P,C,K		143	R	ARG:143:A	1.176	3	-0.060, 2.008	5.2	e		18/26	R,C,H		143
144	T	THR:144:A	-0.162	6	-0.384, -0.003	7.5	e		149/150	T,L,I,M,Q,V,A		144	T	THR:144:A	-0.493	9	-0.738, -0.505		9.9	e	f	20/23	T		144	T	THR:144:A	-0.193	6	-0.349, -0.055	7.5	e		149/150	T,I,L,M,Q,V,A		144	T	THR:144:A	1.300	3	0.074, 2.008	5.2	e		19/26	M,T		144
145	P	PRO:145:A	-0.789	9	-0.823, -0.781	9.9	b	s	149/150	P		145	P	PRO:145:A	-0.399	9	-0.738, -0.371		9.8	b	s	20/23	P		145	P	PRO:145:A	-0.773	9	-0.801, -0.772	9.9	b	s	149/150	P		145	P	PRO:145:A	-0.883	8	-1.699, -0.414	9.6	b		19/26	P		145
146	C	CYS:146:A	-0.357	7	-0.502, -0.310	8.7	b		149/150	C,T,A,S		146	C	CYS:146:A	-0.361	8	-0.737, -0.371		9.8	b		20/23	C		146	C	CYS:146:A	-0.372	7	-0.528, -0.268	8.7	b		149/150	C,T,A,S		146	C	CYS:146:A	-0.780	8	-1.604, -0.303	9.6	b		19/26	C		146
147	K	LYS:147:A	-0.808	9	-0.823, -0.801	9.9	b	s	149/150	K		147	K	LYS:147:A	-0.431	9	-0.738, -0.444		9.9	b	s	20/23	K		147	K	LYS:147:A	-0.789	9	-0.801, -0.787	9.9	b	s	149/150	K		147	K	LYS:147:A	0.347	5	-0.719, 0.975	7.4	b		19/26	K,N,R		147
148	G	GLY:148:A	-0.795	9	-0.823, -0.792	9.9	b	s	149/150	G		148	G	GLY:148:A	-0.380	8	-0.738, -0.371		9.8	b		20/23	G		148	G	GLY:148:A	-0.778	9	-0.801, -0.772	9.9	b	s	149/150	G		148	G	GLY:148:A	-0.833	8	-1.699, -0.303	9.6	b		19/26	G		148
149	G	GLY:149:A	-0.719	9	-0.792, -0.689	9.9	b	s	150/150	G,D		149	G	GLY:149:A	-0.380	8	-0.738, -0.371		9.8	b		20/23	G		149	G	GLY:149:A	-0.708	9	-0.772, -0.671	9.9	b	s	150/150	G,D		149	G	GLY:149:A	0.706	4*	-0.520, 1.574	7.3	b		19/26	G,V,D		149
150	I	ILE:150:A	-0.727	9	-0.781, -0.689	9.9	b	s	150/150	I,K,M,V		150	I	ILE:150:A	-0.483	9	-0.738, -0.505		9.9	b	s	20/23	I		150	I	ILE:150:A	-0.688	9	-0.749, -0.643	9.9	b	s	150/150	I,K,M,V		150	I	ILE:150:A	0.071	5*	-0.905, 0.749	8.4	b		19/26	I,L,V		150
151	R	ARG:151:A	-0.762	9	-0.808, -0.734	9.9	b	s	150/150	R,H		151	R	ARG:151:A	-0.452	9	-0.738, -0.444		9.9	b	s	20/23	R		151	R	ARG:151:A	-0.747	9	-0.787, -0.734	9.9	b	s	150/150	R,H		151	R	ARG:151:A	1.603	3	0.218, 2.663	5.2	b		19/26	C,H,R		151
152	Y	TYR:152:A	0.224	5	-0.124, 0.328	6.5	b		150/150	Y,R,F		152	Y	TYR:152:A	-0.369	8	-0.737, -0.371		9.8	b		20/23	Y		152	Y	TYR:152:A	0.166	5	-0.172, 0.268	6.5	b		150/150	Y,F,R		152	Y	TYR:152:A	1.449	3	0.074, 2.663	5.2	b		19/26	H,Y,F,D		152
153	S	SER:153:A	-0.729	9	-0.781, -0.713	9.9	b	s	150/150	S,P,N,A		153	S	SER:153:A	-0.505	9	-0.738, -0.505		9.9	b	s	20/23	S		153	S	SER:153:A	-0.715	9	-0.761, -0.696	9.9	b	s	150/150	S,P,N,A		153	S	SER:153:A	-0.655	7	-1.426, -0.186	9.6	b		19/26	S,N		153
154	T	THR:154:A	1.823	2	0.908, 1.457	4.3	e		150/150	T,M,P,N,K,E,A,S,D,L,Q		154	T	THR:154:A	0.587	4*	-0.371, 1.015		8.4	e		20/23	T,S		154	T	THR:154:A	1.431	3	0.843, 1.391	4.3	e		150/150	T,M,K,N,P,E,L,A,D,S,Q		154	T	THR:154:A	0.018	5*	-0.905, 0.553	8.4	e		19/26	T,A		154
155	D	ASP:155:A	0.274	5	-0.003, 0.328	5.5	e		150/150	D,E,H,S,G,A,N,L		155	D	ASP:155:A	-0.454	9	-0.738, -0.444		9.9	e	f	20/23	D		155	D	ASP:155:A	0.175	5	-0.055, 0.268	5.5	e		150/150	D,E,H,S,G,A,N,L		155	D	ASP:155:A	-0.392	6*	-1.254, 0.218	9.5	e		18/26	X,D,N		155
156	V	VAL:156:A	-0.781	9	-0.814, -0.768	9.9	b	s	150/150	V,S		156	V	VAL:156:A	-0.479	9	-0.738, -0.505		9.9	b	s	20/23	V		156	V	VAL:156:A	-0.764	9	-0.792, -0.749	9.9	b	s	150/150	V,S		156	V	VAL:156:A	0.787	4	-0.303, 1.574	6.3	b		19/26	L,V,E,G		156
157	S	SER:157:A	0.600	4	0.328, 0.908	5.4	e		150/150	S,N,C,T,V,D		157	S	SER:157:A	0.673	4*	-0.371, 1.015		8.4	e		20/23	S,C		157	S	SER:157:A	0.510	4	0.087, 0.506	5.4	e		150/150	S,C,T,N,V,D		157	S	SER:157:A	-0.063	5*	-0.994, 0.553	8.4	e		19/26	S,T,C		157
158	V	VAL:158:A	0.704	4	0.328, 0.908	5.4	e		150/150	V,I,F,M,R,A,L,T,E,K,D		158	V	VAL:158:A	-0.479	9	-0.738, -0.505		9.9	e	f	20/23	V		158	V	VAL:158:A	0.616	4	0.268, 0.843	5.4	e		150/150	V,I,R,F,M,A,T,L,E,K,D		158	V	VAL:158:A	-0.539	7*	-1.341, -0.060	9.5	e		19/26	V,A		158
159	D	ASP:159:A	-0.666	9	-0.752, -0.629	9.8	e	f	150/150	D,L,N,H		159	D	ASP:159:A	-0.454	9	-0.738, -0.444		9.9	e	f	20/23	D		159	D	ASP:159:A	-0.657	9	-0.734, -0.610	9.8	e	f	150/150	D,L,N,H		159	D	ASP:159:A	-1.045	9	-1.801, -0.621	9.7	e	f	19/26	D		159
160	E	GLU:160:A	-0.759	9	-0.808, -0.734	9.9	b	s	150/150	E,I		160	E	GLU:160:A	-0.437	9	-0.738, -0.444		9.9	b	s	20/23	E		160	E	GLU:160:A	-0.743	9	-0.787, -0.716	9.9	b	s	150/150	E,I		160	E	GLU:160:A	-0.997	8	-1.801, -0.520	9.7	b		19/26	E		160
161	V	VAL:161:A	-0.753	9	-0.792, -0.734	9.9	b	s	150/150	V,I,P		161	V	VAL:161:A	-0.479	9	-0.738, -0.505		9.9	b	s	20/23	V		161	V	VAL:161:A	-0.737	9	-0.780, -0.716	9.9	b	s	150/150	V,I,P		161	V	VAL:161:A	-0.536	7*	-1.341, -0.060	9.5	b		19/26	V,I		161
162	K	LYS:162:A	-0.437	7	-0.592, -0.384	8.7	e		150/150	K,Y,T,M,Q,R		162	K	LYS:162:A	-0.431	9	-0.738, -0.444		9.9	e	f	20/23	K		162	K	LYS:162:A	-0.445	8	-0.572, -0.349	8.7	e	f	150/150	K,Y,T,M,Q,R		162	K	LYS:162:A	-0.297	6*	-1.254, 0.378	9.5	e		19/26	K,Q		162
163	A	ALA:163:A	-0.774	9	-0.808, -0.752	9.9	b	s	150/150	A,G		163	A	ALA:163:A	-0.482	9	-0.738, -0.505		9.9	b	s	20/23	A		163	A	ALA:163:A	-0.757	9	-0.792, -0.734	9.9	b	s	150/150	A,G		163	A	ALA:163:A	-1.134	9	-1.801, -0.719	9.7	b	s	19/26	A		163
164	L	LEU:164:A	-0.755	9	-0.808, -0.734	9.9	b	s	150/150	L,A		164	L	LEU:164:A	-0.383	8	-0.738, -0.371		9.8	b		20/23	L		164	L	LEU:164:A	-0.740	9	-0.787, -0.716	9.9	b	s	150/150	L,A		164	L	LEU:164:A	-0.843	8	-1.699, -0.303	9.6	b		19/26	L		164
165	A	ALA:165:A	-0.412	7	-0.550, -0.310	8.7	b		150/150	A,F,S		165	A	ALA:165:A	-0.482	9	-0.738, -0.505		9.9	b	s	20/23	A		165	A	ALA:165:A	-0.422	7	-0.528, -0.349	8.7	b		150/150	A,S,F		165	A	ALA:165:A	-0.553	7*	-1.341, -0.060	9.5	b		19/26	A,V		165
166	S	SER:166:A	-0.541	8	-0.661, -0.502	9.8	b		150/150	S,A,C,T,Q		166	S	SER:166:A	-0.505	9	-0.738, -0.505		9.9	b	s	20/23	S		166	S	SER:166:A	-0.572	8	-0.671, -0.528	9.8	b		150/150	S,A,C,T,Q		166	S	SER:166:A	-0.082	5*	-0.994, 0.553	8.4	b		19/26	S,T,A		166
167	L	LEU:167:A	-0.756	9	-0.808, -0.734	9.9	b	s	150/150	L,H		167	L	LEU:167:A	-0.383	8	-0.738, -0.371		9.8	b		20/23	L		167	L	LEU:167:A	-0.741	9	-0.787, -0.716	9.9	b	s	150/150	L,H		167	L	LEU:167:A	-0.843	8	-1.699, -0.303	9.6	b		19/26	L		167
168	M	MET:168:A	-0.788	9	-0.814, -0.781	9.9	b	s	150/150	M,F		168	M	MET:168:A	-0.479	9	-0.738, -0.505		9.9	b	s	23/23	M		168	M	MET:168:A	-0.770	9	-0.796, -0.761	9.9	b	s	150/150	M,F		168	M	MET:168:A	-0.522	7*	-1.341, 0.074	9.5	b		20/26	M,T		168
169	T	THR:169:A	-0.779	9	-0.814, -0.768	9.9	b	s	150/150	T,S		169	T	THR:169:A	-0.495	9	-0.738, -0.505		9.9	b	s	23/23	T		169	T	THR:169:A	-0.762	9	-0.792, -0.749	9.9	b	s	150/150	T,S		169	T	THR:169:A	-0.597	7*	-1.426, -0.060	9.5	b		20/26	T,A		169
170	Y	TYR:170:A	-0.275	7	-0.447, -0.124	7.6	b		150/150	Y,F,C,W		170	Y	TYR:170:A	-0.371	8	-0.737, -0.371		9.8	b		23/23	Y		170	Y	TYR:170:A	-0.297	7	-0.477, -0.172	8.6	b		150/150	Y,F,C,W		170	Y	TYR:170:A	-0.048	5*	-1.082, 0.553	9.4	b		20/26	Y,C		170
171	K	LYS:171:A	-0.768	9	-0.808, -0.752	9.9	b	s	150/150	K,L		171	K	LYS:171:A	-0.433	9	-0.738, -0.444		9.9	b	s	23/23	K		171	K	LYS:171:A	-0.751	9	-0.787, -0.734	9.9	b	s	150/150	K,L		171	K	LYS:171:A	-0.976	8	-1.699, -0.520	9.7	b		20/26	K		171
172	C	CYS:172:A	-0.761	9	-0.808, -0.734	9.9	b	s	150/150	C,T		172	C	CYS:172:A	-0.363	8	-0.737, -0.371		9.8	b		23/23	C		172	C	CYS:172:A	-0.746	9	-0.787, -0.716	9.9	b	s	150/150	C,T		172	C	CYS:172:A	0.730	4*	-0.520, 1.574	7.3	b		20/26	C,Y,S		172
173	A	ALA:173:A	-0.628	8	-0.713, -0.592	9.8	b		150/150	A,F,S		173	A	ALA:173:A	-0.484	9	-0.738, -0.505		9.9	b	s	23/23	A		173	A	ALA:173:A	-0.622	9	-0.696, -0.572	9.8	b	s	150/150	A,F,S		173	A	ALA:173:A	-0.548	7*	-1.341, -0.060	9.5	b		20/26	A,V		173
174	V	VAL:174:A	-0.438	7	-0.550, -0.384	8.7	b		150/150	V,I,T,C		174	V	VAL:174:A	-0.481	9	-0.738, -0.505		9.9	b	s	23/23	V		174	V	VAL:174:A	-0.446	8	-0.572, -0.349	8.7	b		150/150	V,C,I,T		174	V	VAL:174:A	-0.511	7*	-1.341, 0.074	9.5	b		20/26	V,M		174
175	V	VAL:175:A	-0.783	9	-0.814, -0.768	9.9	b	s	150/150	V,C		175	V	VAL:175:A	-0.481	9	-0.738, -0.505		9.9	b	s	23/23	V		175	V	VAL:175:A	-0.765	9	-0.792, -0.749	9.9	b	s	150/150	V,C		175	V	VAL:175:A	-1.127	9	-1.801, -0.719	9.7	b	s	20/26	V		175
176	D	ASP:176:A	-0.669	9	-0.752, -0.629	9.8	e	f	149/150	D,N,G		176	D	ASP:176:A	-0.456	9	-0.738, -0.444		9.9	e	f	23/23	D		176	D	ASP:176:A	-0.618	9	-0.696, -0.572	9.8	e	f	149/150	D,N,G		176	D	ASP:176:A	-1.117	9	-1.801, -0.719	9.7	e	f	21/26	D		176
177	V	VAL:177:A	-0.782	9	-0.814, -0.768	9.9	b	s	149/150	V,K		177	V	VAL:177:A	-0.481	9	-0.738, -0.505		9.9	b	s	23/23	V		177	V	VAL:177:A	-0.764	9	-0.792, -0.749	9.9	b	s	149/150	V,K		177	V	VAL:177:A	0.126	5*	-0.814, 0.749	8.4	b		21/26	V,Y,M		177
178	P	PRO:178:A	-0.789	9	-0.823, -0.781	9.9	e	f	149/150	P		178	P	PRO:178:A	-0.401	9	-0.738, -0.371		9.8	e	f	23/23	P		178	P	PRO:178:A	-0.773	9	-0.801, -0.761	9.9	e	f	149/150	P		178	P	PRO:178:A	0.615	4*	-0.520, 1.574	7.3	e		22/26	P,D,L		178
179	F	PHE:179:A	-0.805	9	-0.823, -0.801	9.9	b	s	149/150	F		179	F	PHE:179:A	-0.379	8	-0.738, -0.371		9.8	b		23/23	F		179	F	PHE:179:A	-0.786	9	-0.801, -0.780	9.9	b	s	149/150	F		179	F	PHE:179:A	-0.191	6*	-1.168, 0.378	9.5	b		22/26	F,V		179
180	G	GLY:180:A	-0.795	9	-0.823, -0.792	9.9	b	s	149/150	G		180	G	GLY:180:A	-0.382	8	-0.738, -0.371		9.8	b		23/23	G		180	G	GLY:180:A	-0.777	9	-0.801, -0.772	9.9	b	s	149/150	G		180	G	GLY:180:A	0.486	4*	-0.621, 1.244	7.3	b		22/26	W,G,S		180
181	G	GLY:181:A	-0.639	9	-0.752, -0.592	9.8	b	s	149/150	G,C,P		181	G	GLY:181:A	-0.382	8	-0.738, -0.371		9.8	b		23/23	G		181	G	GLY:181:A	-0.634	9	-0.734, -0.572	9.8	b	s	149/150	G,C,P		181	G	GLY:181:A	0.511	4*	-0.621, 1.244	7.3	b		22/26	G,A,C		181
182	A	ALA:182:A	-0.390	7	-0.550, -0.310	8.7	b		150/150	A,G		182	A	ALA:182:A	-0.484	9	-0.738, -0.505		9.9	b	s	23/23	A		182	A	ALA:182:A	-0.381	7	-0.528, -0.268	8.7	b		150/150	A,G		182	A	ALA:182:A	-0.646	7	-1.426, -0.186	9.6	b		22/26	A,P		182
183	K	LYS:183:A	-0.768	9	-0.808, -0.752	9.9	b	s	150/150	K,A		183	K	LYS:183:A	-0.433	9	-0.738, -0.444		9.9	b	s	23/23	K		183	K	LYS:183:A	-0.752	9	-0.787, -0.734	9.9	b	s	150/150	K,A		183	K	LYS:183:A	-1.061	9	-1.801, -0.621	9.7	b	s	22/26	K		183
184	A	ALA:184:A	-0.662	9	-0.734, -0.629	9.8	b	s	150/150	A,G,Y,F		184	A	ALA:184:A	-0.484	9	-0.738, -0.505		9.9	b	s	23/23	A		184	A	ALA:184:A	-0.653	9	-0.716, -0.610	9.8	b	s	150/150	A,G,Y,F		184	A	ALA:184:A	-0.020	5*	-0.905, 0.553	8.4	b		22/26	G,A,R		184
185	G	GLY:185:A	-0.566	8	-0.689, -0.502	9.8	b		150/150	G,A,D,H		185	G	GLY:185:A	-0.382	8	-0.738, -0.371		9.8	b		23/23	G		185	G	GLY:185:A	-0.566	8	-0.696, -0.477	9.8	b		150/150	G,A,D,H		185	G	GLY:185:A	2.111	2	0.749, 4.327	4.1	b		22/26	G,A,K,S,D		185
186	V	VAL:186:A	0.347	4	-0.003, 0.570	5.4	b		150/150	V,I,L		186	V	VAL:186:A	-0.481	9	-0.738, -0.505		9.9	b	s	23/23	V		186	V	VAL:186:A	0.232	5	-0.055, 0.268	5.5	b		150/150	V,I,L		186	V	VAL:186:A	0.012	5*	-0.905, 0.553	8.4	b		22/26	V,F,I		186
187	K	LYS:187:A	-0.273	7	-0.447, -0.225	7.6	e		150/150	K,R,Q,M,C,I		187	K	LYS:187:A	-0.433	9	-0.738, -0.444		9.9	e	f	23/23	K		187	K	LYS:187:A	-0.259	6	-0.418, -0.172	7.6	e		150/150	K,R,Q,M,C,I		187	K	LYS:187:A	-0.417	6*	-1.254, 0.218	9.5	e		22/26	K,T		187
188	I	ILE:188:A	-0.696	9	-0.752, -0.661	9.9	b	s	150/150	I,V,L,S		188	I	ILE:188:A	-0.485	9	-0.738, -0.505		9.9	b	s	23/23	I		188	I	ILE:188:A	-0.685	9	-0.749, -0.643	9.9	b	s	150/150	I,V,L,S		188	I	ILE:188:A	-0.160	6	-0.994, 0.378	8.5	b		22/26	I,V		188
189	N	ASN:189:A	0.002	5	-0.225, 0.143	6.5	e		150/150	N,D,S,I		189	N	ASN:189:A	-0.490	9	-0.738, -0.505		9.9	e	f	23/23	N		189	N	ASN:189:A	-0.060	5	-0.268, 0.087	7.5	e		150/150	N,D,S,I		189	N	ASN:189:A	1.237	3	0.074, 2.008	5.2	e		22/26	N,A,S,Y		189
190	P	PRO:190:A	-0.007	5	-0.310, 0.143	7.5	e		149/150	P,T,V,H		190	P	PRO:190:A	-0.401	9	-0.738, -0.371		9.8	e	f	23/23	P		190	P	PRO:190:A	-0.129	6	-0.349, -0.055	7.5	b		149/150	P,T,V,H		190	P	PRO:190:A	-0.964	8	-1.699, -0.520	9.7	b		22/26	P		190
191	K	LYS:191:A	0.804	4	0.328, 0.908	5.4	e		150/150	K,R,Q,S,G,L,F,A,H,T		191	K	LYS:191:A	0.895	4	-0.281, 1.574		7.4	e		23/23	K,R		191	K	LYS:191:A	0.734	4	0.268, 0.843	5.4	e		150/150	K,R,Q,S,G,F,A,L,H,T		191	K	LYS:191:A	-0.341	6*	-1.254, 0.218	9.5	e		21/26	K,R		191
192	N	ASN:192:A	3.024	1	1.457, 3.024	3.1	e		150/150	N,S,H,K,L,D,E,A,Q,M,T,Y,I		192	N	ASN:192:A	3.128	2	1.015, 5.326		4.1	e		23/23	N,S,H		192	N	ASN:192:A	2.973	1	1.391, 2.973	3.1	e		150/150	N,H,K,D,L,E,A,Q,M,T,Y,I		192	N	ASN:192:A	0.579	4*	-0.520, 1.244	7.3	e		21/26	N,H,S,T		192
193	Y	TYR:193:A	-0.242	6	-0.447, -0.124	7.6	b		150/150	Y,F,H,G,W		193	Y	TYR:193:A	-0.371	8	-0.737, -0.371		9.8	b		23/23	Y		193	Y	TYR:193:A	-0.212	6	-0.418, -0.055	7.5	b		150/150	Y,F,H,G,W		193	Y	TYR:193:A	-0.819	8	-1.699, -0.303	9.6	b		21/26	Y		193
194	T	THR:194:A	-0.431	7	-0.550, -0.384	8.7	e		150/150	T,S		194	T	THR:194:A	-0.495	9	-0.738, -0.505		9.9	e	f	23/23	T		194	T	THR:194:A	-0.424	7	-0.528, -0.349	8.7	e		150/150	T,S		194	T	THR:194:A	-1.186	9	-1.801, -0.814	9.8	e	f	21/26	T		194
195	D	ASP:195:A	0.329	5	-0.003, 0.570	5.4	e		149/150	D,E,I,V,T,A,L		195	D	ASP:195:A	-0.456	9	-0.738, -0.444		9.9	e	f	23/23	D		195	E	GLU:195:A	0.285	5	-0.055, 0.506	5.4	e		149/150	E,D,I,V,T,A,L		195	E	GLU:195:A	0.176	5*	-0.814, 0.749	8.4	e		21/26	D,N,E		195
196	N	ASN:196:A	1.083	3	0.570, 1.457	4.3	e		149/150	N,T,A,S,H,L,E,M,G,R,F,Q,K,D		196	N	ASN:196:A	-0.490	9	-0.738, -0.505		9.9	e	f	23/23	N		196	N	ASN:196:A	0.996	3	0.506, 1.391	4.3	e		149/150	N,A,T,H,S,L,E,M,G,R,F,Q,K,D		196	N	ASN:196:A	-1.166	9	-1.801, -0.814	9.8	e	f	21/26	N		196
197	E	GLU:197:A	-0.759	9	-0.808, -0.734	9.9	b	s	149/150	E,D		197	E	GLU:197:A	-0.439	9	-0.738, -0.444		9.9	b	s	23/23	E		197	E	GLU:197:A	-0.744	9	-0.787, -0.716	9.9	b	s	149/150	E,D		197	E	GLU:197:A	-1.013	8	-1.801, -0.621	9.7	b		21/26	E		197
198	L	LEU:198:A	-0.657	9	-0.734, -0.592	9.8	b	s	149/150	L,M,K,I		198	L	LEU:198:A	-0.385	8	-0.738, -0.371		9.8	b		23/23	L		198	L	LEU:198:A	-0.649	9	-0.734, -0.610	9.8	b	s	149/150	L,M,K,I		198	L	LEU:198:A	-0.858	8	-1.699, -0.414	9.6	b		21/26	L		198
199	E	GLU:199:A	-0.806	9	-0.823, -0.801	9.9	e	f	149/150	E		199	E	GLU:199:A	-0.439	9	-0.738, -0.444		9.9	e	f	23/23	E		199	E	GLU:199:A	-0.787	9	-0.801, -0.787	9.9	e	f	149/150	E		199	E	GLU:199:A	-0.375	6*	-1.254, 0.218	9.5	e		21/26	D,E		199
200	K	LYS:200:A	-0.287	7	-0.447, -0.225	7.6	e		149/150	K,R,Q,T,A		200	K	LYS:200:A	-0.433	9	-0.738, -0.444		9.9	e	f	23/23	K		200	K	LYS:200:A	-0.306	7	-0.477, -0.172	8.6	e		149/150	K,R,T,Q,A		200	K	LYS:200:A	-0.342	6*	-1.254, 0.218	9.5	e		21/26	K,N		200
201	I	ILE:201:A	-0.756	9	-0.801, -0.734	9.9	b	s	149/150	I,M		201	I	ILE:201:A	-0.485	9	-0.738, -0.505		9.9	b	s	23/23	I		201	I	ILE:201:A	-0.741	9	-0.780, -0.716	9.9	b	s	149/150	I,M		201	I	ILE:201:A	-1.158	9	-1.801, -0.814	9.8	b	s	21/26	I		201
202	T	THR:202:A	-0.811	9	-0.824, -0.808	9.9	b	s	149/150	T		202	T	THR:202:A	-0.495	9	-0.738, -0.505		9.9	b	s	23/23	T		202	T	THR:202:A	-0.791	9	-0.801, -0.787	9.9	b	s	149/150	T		202	T	THR:202:A	-0.207	6*	-1.082, 0.378	9.5	b		22/26	T,A,I		202
203	R	ARG:203:A	-0.807	9	-0.823, -0.801	9.9	e	f	149/150	R		203	R	ARG:203:A	-0.454	9	-0.738, -0.444		9.9	e	f	23/23	R		203	R	ARG:203:A	-0.787	9	-0.801, -0.787	9.9	e	f	149/150	R		203	R	ARG:203:A	-1.126	9	-1.801, -0.719	9.7	e	f	22/26	R		203
204	R	ARG:204:A	-0.676	9	-0.752, -0.629	9.8	e	f	149/150	R,K,N,S		204	R	ARG:204:A	-0.454	9	-0.738, -0.444		9.9	e	f	23/23	R		204	R	ARG:204:A	-0.667	9	-0.734, -0.643	9.9	e	f	149/150	R,K,N,S		204	R	ARG:204:A	-0.515	7*	-1.341, 0.074	9.5	e		22/26	R,M		204
[truncated: 354 more rows]
[truncated: 4 more columns]

## Sheet: GLUD_pockets
GLUD1												GLUD1													GLUD2												GLUD2
[truncated: 67 more rows]
[truncated: 3 more columns]

## Sheet: Sum
		Average COLOR score - with sufficient data
[truncated: 66 more rows]
