# Supplementary material for: A comparative analysis of fruit fly and human glutamate dehydrogenases in Drosophila melanogaster sperm development
Source: Front Cell Dev Biol. 2023 Nov 2;11:1281487. doi: 10.3389/fcell.2023.1281487 (PMC10652781; doi:10.3389/fcell.2023.1281487)
Supplement: Supplementary file 4 [file Table4.XLSX]

## Sheet: Sheet1
bb8 and GDH constructs
bb8_PROM_5UTR_MITS	fwd	tttaatgaggaaaacctgttttgctGTA TGTCTAAATTGTAATCTG TGCTACTG
bb8_PROM_5UTR_MITS	rev	ggccaccaactcgctCGCGGCCT TGTGATAATAATAAAG
bb8_3UTR	fwd	cctggccttctagTGGTTTACCC TCAAGAACAAAAG
bb8_3UTR	rev	gcctcatcatcactagatggcatttcttctg ATGTTTTAATTAAATAGT AACTCTTTTATTCAAC
Gdh_MitS	fwd	tcacaaggccgcgGGCTATGCC ACCGAGCACCAG
Gdh_MitS	rev	tgagggtaaaccaCTAGAAGGC CAGGCCGGCATC
GLUD2_MitS	fwd	tcacaaggccgcgAGCGAGTTG GTGGCCGACCGC
GLUD2_MitS	rev	tgagggtaaaccaCTATGTGAA GGTCACACCAGCTTCACT GTACAC
GLUD1_MitS	fwd	tcacaaggccgcgAGCGAGGCGGTGGCCGACCGC
GLUD1_MitS	rev	tgagggtaaaccaCTATGTGAAGGTCACACCAGCTTCATTGTACACTTTGAAGACTTTC
bb8 mutant
bb8_R247>A	fwd	GCATTAATGGTGCCCATTCGGCCAC
bb8_R247>A	rev	CGCCGTTGTGTACGGGCTTC
Gdh mutants
bb8-Gdh_G>A	fwd	CTGGACTACACCATGGAGCG
bb8-Gdh_G>A	rev	AGCGGAGTGCACGATATCCTTCTC
bb8-Gdh-Backbone	fwd	cgagaaggtcatcaccagcgagaatg
bb8-Gdh-Backbone	rev	tcatgtcgggggcgggcacat
Gdh-NADpock-mid	fwd	tgtgcccgcccccgacatgaacaccggtgagcgcgagatgtc
Gdh-NADpock-mid	rev	cgctggtgatgaccttctcggtggcagcgggaatgaagatgtc
additional bb8 driver constructs
bb8-GC2-HA	fwd	gacggttgtgttttttcaaaatgttggaacaagttgagcaaaag
bb8-GC2-HA	rev	ttgttcttgagggtaaaccattacgcatagtcaggaacatc
bb8-dmGlut-HA	fwd	gacggttgtgttttttcaaaatgacgcaacagccacaatgg
bb8-dmGlut-HA	rev	ccatCacgcatagtcaggaacatcgtatgggtacgagctctgctccagaccacttg
bb8-Ara1-HA	fwd	gacggttgtgttttttcaaaatgcacgataaggatgagtctccgtcg
bb8-Ara1-HA	rev	ccatcacgcatagtcaggaacatcgtatgggtaggatcccgtggccgtcgaggg
