# Supplementary material for: A comparative analysis of fruit fly and human glutamate dehydrogenases in Drosophila melanogaster sperm development
Source: Front Cell Dev Biol. 2023 Nov 2;11:1281487. doi: 10.3389/fcell.2023.1281487 (PMC10652781; doi:10.3389/fcell.2023.1281487)
Supplement: Supplementary file 5 [file Table1.xlsx]

## Sheet: (A)_SNAP results
Gdh
Compare	Sequence names	Sd	Sn	S	N	ps	pn	ds	dn	ds/dn	ps/pn		Compare: Lists the two sequences compared, starting with 0 (4 sequences are seqs 0-3)
0 1	Dmel-Gdh-PF Dyak-GE10843-PB	44.0000	2.0000	385.0000	1262.0000	0.1143	0.0016	0.1240	0.0016	78.1569	72.1143		Sequences_names: The names of the two sequences being compared.
0 2	Dmel-Gdh-PF Dere-GG12388-PB	40.0000	2.0000	385.0000	1262.0000	0.1039	0.0016	0.1118	0.0016	70.4931	65.5584		Sd: The number of observed synonymous substitutions
0 3	Dmel-Gdh-PF Dana-GF17976-PB	85.5000	11.5000	383.6667	1260.3333	0.2228	0.0091	0.2644	0.0092	28.8045	24.4230		Sn: The number of observed non-synonymous substitutions
0 4	Dmel-Gdh-PF Dwil-GK11603-PB	201.6667	16.3333	381.3333	1265.6667	0.5288	0.0129	0.9159	0.0130	70.3614	40.9802		S: The number of potential synonymous substitutions (the average for the two compared sequences)
0 5	Dmel-Gdh-PF Dpse-GA18802-PB	116.1667	14.8333	382.5000	1261.5000	0.3037	0.0118	0.3893	0.0119	32.8493	25.8285		N: The number of potential non-synonymous substitutions (the average for the two compared sequences)
0 6	Dmel-Gdh-PF Dmoj-GI22276-PB	143.3333	37.6667	379.6667	1252.3333	0.3775	0.0301	0.5249	0.0307	17.1003	12.5518		ps: The proportion of observed synonymous substitutions: Sd/S
0 7	Dmel-Gdh-PF Dvir-GJ24069-PB	168.5000	33.5000	378.0000	1254.0000	0.4458	0.0267	0.6767	0.0272	24.8773	16.6863		pn: The proportion of observed non-synonymous substitutions: Sn/N
0 8	Dmel-Gdh-PF Dgri-GH19680-PC	158.5000	36.5000	378.6667	1253.3333	0.4186	0.0291	0.6125	0.0297	20.6210	14.3730		ds: The Jukes-Cantor correction for multiple hits of ps
0 9	Dmel-Gdh-PF Dsim-GD18335-PB	18.0000	1.0000	384.8333	1262.1667	0.0468	0.0008	0.0483	0.0008	60.9249	59.0359		dn: The Jukes-Cantor correction for multiple hits of pn
0 10	Dmel-Gdh-PF Dele-LOC108136871	65.0000	9.0000	385.0000	1262.0000	0.1688	0.0071	0.1913	0.0072	26.6931	23.6739		ds/dn: The ratio of synonymous to non-synonymous substitutions
Averages of the first sequence compared to others:
ds = 0.3859 dn = 0.0133 ds/dn = 43.0882 ps/pn = 35.5225
Bb8													ds/dn
Compare	Sequence names	Sd	Sn	S	N	ps	pn	ds	dn	ds/dn	ps/pn		< 1 - positive or Darwinian selection (driving change)
0 1	Dmel-bb8-PA Dyak-GE23967-PA	138.0000	27.0000	355.3333	1249.6667	0.3884	0.0216	0.5471	0.0219	24.9547	17.9752		> 1 - purifying or stabilizing selection (acting against change)
0 2	Dmel-bb8-PA Dere-GG12444-PA	152.0000	29.0000	355.5000	1249.5000	0.4276	0.0232	0.6331	0.0236	26.8550	18.4222		~1 - indicates neutral (i.e. no) selection
0 3	Dmel-bb8-PA Dana-GF18014-PA	269.3333	163.6667	356.3333	1248.6667	0.7558	0.1311	>3.2000	0.1441	22.2123	5.7666
0 4	Dmel-bb8-PA Dpse-GA18181-PA	253.3333	181.6667	355.3333	1249.6667	0.7129	0.1454	2.2558	0.1616	13.9594	4.9043		sequence Ids
0 5	Dmel-bb8-PA Dwil-GK11580-PA	260.5000	156.5000	338.0000	1198.0000	0.7707	0.1306	>3.2000	0.1435	22.2945	5.8997		Bb8 like:
0 6	Dmel-bb8-PA Dmoj-GI23213-PA	264.8333	209.1667	352.3333	1243.6667	0.7517	0.1682	>3.2000	0.1904	16.8031	4.4692		>Dmel-bb8-PA
0 7	Dmel-bb8-PA Dvir-GJ22872-PA	282.5000	195.5000	354.8333	1247.1667	0.7961	0.1568	>3.2000	0.1758	18.1974	5.0789		>Dyak-GE23967-PA
0 8	Dmel-bb8-PA Dgri-GH20746-PA	286.8333	185.1667	352.8333	1249.1667	0.8129	0.1482	>3.2000	0.1652	19.3762	5.4843		>Dere-GG12444-PA
0 9	Dmel-bb8-PA Dmoj-GI23212-PA	276.0000	204.0000	355.1667	1243.8333	0.7771	0.1640	>3.2000	0.1851	17.2901	4.7382		>Dana-GF18014-PA
0 10	Dmel-bb8-PA Dvir-GJ22871-PA	281.6667	201.3333	351.3333	1244.6667	0.8017	0.1618	>3.2000	0.1822	17.5632	4.9563		>Dpse-GA18181-PA
0 11	Dmel-bb8-PA Dpse-GA23808-PA	266.6667	274.3333	354.8333	1229.1667	0.7515	0.2232	>3.2000	0.2649	12.0791	3.3673		>Dwil-GK11580-PA
0 12	Dmel-bb8-PA Dele-LOC108148676	201.3333	107.6667	357.0000	1245.0000	0.5640	0.0865	1.0456	0.0919	11.3792	6.5213		>Dmoj-GI23213-PA
													>Dvir-GJ22872-PA
Averages of the first sequence compared to others:													>Dgri-GH20746-PA
ds = 2.5068 dn = 0.1459 ds/dn = 18.5803 ps/pn = 7.2986													>Dmoj-GI23212-PA
													>Dvir-GJ22871-PA
													>Dpse-GA23808-PA
													>Dele-LOC108148676
													Gdh-like:
													>Dmel-Gdh-PF
													>Dyak-GE10843-PB
													>Dere-GG12388-PB
													>Dana-GF17976-PB
													>Dwil-GK11603-PB
													>Dpse-GA18802-PB
													>Dmoj-GI22276-PB
													>Dvir-GJ24069-PB
													>Dgri-GH19680-PC
													>Dsim-GD18335-PB
													>Dele-LOC108136871

## Sheet: (B)_SNAP_sequence
Gdh										Bb8
	Cumulative			Per Codon							Cumulative			Per Codon
codon	indel	syn	nonsyn	indel	syn	nonsyn	aa			codon	indel	syn	nonsyn	indel	syn	nonsyn	aa
1	0	0	0	0	0	0	M			1	0.08	0	0	0.08	0	0	M
2	0	0	0	0	0	0	Y			2	0.17	0.25	0.58	0.08	0.25	0.58	L
3	0	0	0	0	0	0	H			3	0.25	0.83	0.75	0.08	0.58	0.17	R
4	0	0.1	0	0	0.1	0	L			4	0.42	1.04	1.88	0.17	0.21	1.12	Y
5	0	0.1	0	0	0	0	K			5	0.5	1.51	3.4	0.08	0.47	1.53	T
6	0	0.1	0	0	0	0	S			6	0.58	1.93	4.9	0.08	0.42	1.5	A
7	0	0.7	0	0	0.6	0	L			7	0.67	2.53	6.22	0.08	0.6	1.32	R
8	0	0.9	0	0	0.2	0	A			8	0.75	2.81	7.19	0.08	0.28	0.97	I
9	0	1.2	0	0	0.3	0	R			9	0.83	3.44	8.31	0.08	0.64	1.11	L
10	0	1.2	0	0	0	0	Q			10	0.92	3.67	10.08	0.08	0.22	1.78	N
11	0	1.6	0	0	0.4	0	G			11	1	4.01	11.32	0.08	0.35	1.24	G
12	0	1.8	0	0	0.2	0	A			12	1.08	4.39	12.61	0.08	0.38	1.29	I
13	0	2.23	1.67	0	0.43	1.67	R			13	1.17	5.01	14.15	0.08	0.62	1.54	Y
14	0	2.53	1.77	0	0.3	0.1	R			14	1.25	5.79	15.54	0.08	0.78	1.39	P
15	0	2.53	1.77	0	0	0	Q			15	1.33	6.17	16.58	0.08	0.38	1.04	L
16	0	2.53	2.07	0	0	0.3	Q			16	1.42	6.29	18.04	0.08	0.12	1.46	M
17	0	2.53	2.07	0	0	0	E			17	1.5	7	18.92	0.08	0.71	0.88	P
18	0	2.73	2.07	0	0.2	0	L			18	1.58	7.33	20.17	0.08	0.33	1.25	R
19	0	2.83	2.77	0	0.1	0.7	A			19	1.67	7.5	21	0.08	0.17	0.83	Q
20	0	3.33	3.07	0	0.5	0.3	T			20	1.75	8.1	22.15	0.08	0.6	1.15	V
21	0	3.73	3.07	0	0.4	0	L			21	2.75	8.1	22.15	1	0	0	-
22	0	4.03	3.17	0	0.3	0.1	A			22	3.75	8.1	22.15	1	0	0	-
23	0	4.23	3.17	0	0.2	0	K			23	4.75	8.1	22.15	1	0	0	-
24	0	4.73	3.17	0	0.5	0	A			24	5.75	8.1	22.15	1	0	0	-
25	0	5.03	3.17	0	0.3	0	L			25	6.33	8.18	22.57	0.58	0.08	0.42	L
26	0	5.23	3.17	0	0.2	0	P			26	6.5	8.68	23.57	0.17	0.5	1	K
27	0	5.93	3.17	0	0.7	0	T			27	6.58	9.26	23.74	0.08	0.58	0.17	R
28	0	6.43	3.17	0	0.5	0	A			28	6.58	9.75	25.33	0	0.49	1.6	S
29	0	6.43	3.27	0	0	0.1	V			29	6.58	10.33	26.42	0	0.58	1.08	A
30	0	6.63	3.97	0	0.2	0.7	M			30	6.58	10.33	26.42	0	0	0	H
31	0	6.63	4.27	0	0	0.3	Q			31	6.58	10.5	26.92	0	0.17	0.5	Q
32	0	7.08	4.92	0	0.45	0.65	S			32	6.58	10.67	27.83	0	0.17	0.92	V
33	0.5	7.08	5.12	0.5	0	0.2	S			33	6.58	10.83	27.83	0	0.17	0	P
34	0.8	7.48	5.12	0.3	0.4	0	R			34	6.58	10.92	27.83	0	0.08	0	E
35	1.1	7.48	5.12	0.3	0	0	G			35	6.58	11	29.17	0	0.08	1.33	K
36	1.4	7.48	5.12	0.3	0	0	Y			36	6.58	11.33	29.17	0	0.33	0	L
37	1.7	7.48	5.12	0.3	0	0	A			37	6.58	11.75	29.33	0	0.42	0.17	K
38	1.7	7.48	5.82	0	0	0.7	T			38	6.58	12.5	30.08	0	0.75	0.75	K
39	1.7	7.68	6.42	0	0.2	0.6	E			39	6.58	13.25	30.08	0	0.75	0	V
40	1.7	8.08	6.72	0	0.4	0.3	H			40	6.58	13.78	30.81	0	0.53	0.72	E
41	1.7	8.28	6.72	0	0.2	0	Q			41	6.58	14.15	31.01	0	0.38	0.21	T
42	1.7	8.68	6.72	0	0.4	0	I			42	6.58	14.24	31.35	0	0.08	0.33	D
43	1.7	8.78	6.72	0	0.1	0	P			43	6.58	14.36	31.47	0	0.12	0.12	K
44	1.7	9.38	6.72	0	0.6	0	D			44	6.58	15.03	31.56	0	0.67	0.08	D
45	1.7	9.88	6.72	0	0.5	0	R			45	6.58	15.94	31.56	0	0.92	0	P
46	1.7	10.28	6.72	0	0.4	0	L			46	6.58	16.65	31.85	0	0.71	0.29	E
47	1.7	10.28	6.72	0	0	0	K			47	6.58	16.82	32.01	0	0.17	0.17	F
48	1.7	10.58	6.72	0	0.3	0	D			48	6.58	17.15	32.01	0	0.33	0	S
49	1.7	10.58	6.72	0	0	0	V			49	6.58	17.49	33.43	0	0.33	1.42	E
50	1.7	10.98	6.72	0	0.4	0	P			50	6.58	17.49	33.51	0	0	0.08	M
51	1.7	11.38	6.72	0	0.4	0	T			51	6.58	18.15	33.6	0	0.67	0.08	V
52	1.7	11.48	6.72	0	0.1	0	A			52	6.58	19.03	34.31	0	0.88	0.71	L
53	1.7	11.48	6.72	0	0	0	K			53	6.58	19.78	34.31	0	0.75	0	Y
54	1.7	11.58	6.72	0	0.1	0	D			54	6.58	20.44	34.39	0	0.67	0.08	Y
55	1.7	11.98	6.72	0	0.4	0	P			55	6.58	20.94	34.39	0	0.5	0	Y
56	1.7	12.68	6.72	0	0.7	0	R			56	6.58	21.19	34.39	0	0.25	0	H
57	1.7	12.68	6.72	0	0	0	F			57	6.58	21.19	34.64	0	0	0.25	K
58	1.7	13.28	6.72	0	0.6	0	F			58	6.58	21.78	34.72	0	0.58	0.08	A
59	1.7	13.28	6.72	0	0	0	D			59	6.58	22.78	34.72	0	1	0	A
60	1.7	13.28	6.72	0	0	0	M			60	6.58	22.94	34.72	0	0.17	0	Q
61	1.7	13.48	6.72	0	0.2	0	V			61	6.58	23.85	35.57	0	0.9	0.85	T
62	1.7	13.48	6.72	0	0	0	E			62	6.58	23.85	35.65	0	0	0.08	M
63	1.7	14.38	6.72	0	0.9	0	Y			63	6.58	24.51	35.65	0	0.67	0	E
64	1.7	14.38	6.72	0	0	0	F			64	6.58	25.26	37.15	0	0.75	1.5	P
65	1.7	14.38	6.72	0	0	0	F			65	6.58	25.74	38.18	0	0.47	1.03	A
66	1.7	14.78	6.72	0	0.4	0	H			66	6.58	26.24	38.18	0	0.5	0	L
67	1.7	14.78	6.72	0	0	0	R			67	6.58	26.49	39.01	0	0.25	0.83	L
68	1.7	14.78	6.72	0	0	0	G			68	6.58	26.86	39.22	0	0.38	0.21	K
69	1.7	14.88	6.72	0	0.1	0	C			69	6.58	27.29	39.79	0	0.43	0.57	E
70	1.7	15.08	6.72	0	0.2	0	Q			70	6.58	27.29	39.88	0	0	0.08	M
71	1.7	15.38	6.72	0	0.3	0	I			71	6.58	27.5	40.67	0	0.21	0.79	E
72	1.7	15.48	7.02	0	0.1	0.3	A			72	6.58	27.65	41.35	0	0.15	0.68	K
73	1.7	15.68	7.02	0	0.2	0	E			73	6.58	27.9	41.43	0	0.25	0.08	Y
74	1.7	16.28	7.32	0	0.6	0.3	E			74	6.58	28.57	41.93	0	0.67	0.5	P
75	1.7	16.68	8.72	0	0.4	1.4	S			75	6.58	29.15	42.35	0	0.58	0.42	H
76	1.7	16.88	8.72	0	0.2	0	L			76	6.58	29.15	43.1	0	0	0.75	M
77	1.7	17.33	9.17	0	0.45	0.45	V			77	6.58	29.15	43.26	0	0	0.17	K
78	1.7	17.93	9.17	0	0.6	0	D			78	6.58	29.82	43.43	0	0.67	0.17	P
79	1.7	18.13	9.17	0	0.2	0	D			79	6.58	30.11	43.56	0	0.29	0.12	E
80	1.7	18.13	9.17	0	0	0	M			80	6.58	30.19	43.72	0	0.08	0.17	E
81	1.7	18.13	9.17	0	0	0	K			81	6.58	30.65	45.18	0	0.46	1.46	R
82	1.7	18.23	9.17	0	0.1	0	G			82	6.58	30.74	45.51	0	0.08	0.33	Q
83	1.7	18.53	9.17	0	0.3	0	K			83	6.58	31.36	45.72	0	0.62	0.21	A
84	1.7	18.83	9.27	0	0.3	0.1	L			84	6.58	32.03	45.72	0	0.67	0	R
85	1.7	19.13	9.57	0	0.3	0.3	T			85	6.58	32.61	45.72	0	0.58	0	V
86	1.7	19.52	9.98	0	0.38	0.42	R			86	6.58	33.32	46.51	0	0.71	0.79	T
87	1.7	19.72	9.98	0	0.2	0	D			87	6.58	34.32	46.6	0	1	0.08	A
88	1.7	19.72	9.98	0	0	0	E			88	6.58	35.24	46.6	0	0.92	0	I
89	1.7	19.92	9.98	0	0.2	0	K			89	6.58	35.99	46.6	0	0.75	0	L
90	1.7	20.02	9.98	0	0.1	0	K			90	6.58	36.18	46.82	0	0.19	0.22	N
91	1.7	20.12	9.98	0	0.1	0	Q			91	6.58	36.81	47.03	0	0.62	0.21	L
92	1.7	20.12	9.98	0	0	0	K			92	6.58	37.6	47.82	0	0.79	0.79	L
93	1.7	20.52	9.98	0	0.4	0	V			93	6.58	38.35	47.82	0	0.75	0	G
94	1.7	20.52	9.98	0	0	0	K			94	6.58	38.93	47.99	0	0.58	0.17	S
95	1.7	21.02	9.98	0	0.5	0	G			95	6.58	39.6	47.99	0	0.67	0	V
96	1.7	21.42	9.98	0	0.4	0	I			96	6.58	39.76	48.9	0	0.17	0.92	S
97	1.7	21.72	9.98	0	0.3	0	L			97	6.58	39.93	49.07	0	0.17	0.17	T
98	1.7	21.72	9.98	0	0	0	M			98	6.58	40.43	49.32	0	0.5	0.25	S
99	1.7	22.22	9.98	0	0.5	0	L			99	6.58	40.76	49.82	0	0.33	0.5	V
100	1.7	22.22	9.98	0	0	0	M			100	6.58	41.01	49.82	0	0.25	0	E
101	1.7	22.72	9.98	0	0.5	0	Q			101	6.58	41.76	49.82	0	0.75	0	V
102	1.7	22.82	9.98	0	0.1	0	P			102	6.58	42.43	50.07	0	0.67	0.25	N
103	1.7	22.92	9.98	0	0.1	0	C			103	6.58	42.51	50.07	0	0.08	0	F
104	1.7	23.22	9.98	0	0.3	0	D			104	6.58	42.85	50.24	0	0.33	0.17	P
105	1.7	23.32	9.98	0	0.1	0	H			105	6.58	43.1	50.32	0	0.25	0.08	I
106	1.7	23.42	9.98	0	0.1	0	I			106	6.58	43.88	51.12	0	0.78	0.81	V
107	1.7	23.52	9.98	0	0.1	0	I			107	6.58	44.33	51.92	0	0.46	0.79	R
108	1.7	23.62	9.98	0	0.1	0	E			108	6.58	44.69	52.72	0	0.36	0.81	K
109	1.7	24.22	9.98	0	0.6	0	I			109	6.58	45.36	53.14	0	0.67	0.42	N
110	1.7	24.72	9.98	0	0.5	0	A			110	6.67	45.61	53.14	0.08	0.25	0	G
111	1.7	24.72	9.98	0	0	0	F			111	6.67	45.82	53.68	0	0.21	0.54	T
112	1.7	25.02	9.98	0	0.3	0	P			112	6.67	46.32	53.68	0	0.5	0	Y
113	1.7	25.12	9.98	0	0.1	0	L			113	6.67	46.74	53.68	0	0.42	0	E
114	1.7	25.62	9.98	0	0.5	0	R			114	6.67	47.28	53.81	0	0.54	0.12	I
115	1.7	25.92	9.98	0	0.3	0	R			115	6.67	47.69	53.97	0	0.42	0.17	I
116	1.7	25.92	9.98	0	0	0	D			116	6.67	48.4	54.93	0	0.71	0.96	S
117	1.7	26.52	9.98	0	0.6	0	A			117	6.67	49.15	54.93	0	0.75	0	G
118	1.7	26.62	9.98	0	0.1	0	G			118	6.67	49.4	54.93	0	0.25	0	Y
119	1.7	26.62	9.98	0	0	0	N			119	6.67	50.24	55.01	0	0.83	0.08	R
120	1.7	26.62	9.98	0	0	0	Y			120	6.67	50.99	55.68	0	0.75	0.67	S
121	1.7	26.62	9.98	0	0	0	E			121	6.67	51.15	55.68	0	0.17	0	H
122	1.7	26.62	9.98	0	0	0	M			122	6.67	51.49	55.68	0	0.33	0	H
123	1.7	27.12	9.98	0	0.5	0	I			123	6.67	51.82	56.01	0	0.33	0.33	V
124	1.7	27.12	9.98	0	0	0	T			124	6.67	52.4	56.18	0	0.58	0.17	R
125	1.7	27.12	9.98	0	0	0	G			125	6.67	52.82	56.68	0	0.42	0.5	H
126	1.7	27.42	9.98	0	0.3	0	Y			126	6.67	53.49	56.68	0	0.67	0	R
127	1.7	28.32	10.08	0	0.9	0.1	R			127	6.67	54.24	56.76	0	0.75	0.08	L
128	1.7	28.62	10.08	0	0.3	0	A			128	6.67	54.65	56.76	0	0.42	0	P
129	1.7	28.62	10.08	0	0	0	Q			129	6.67	55.07	56.85	0	0.42	0.08	L
130	1.7	28.62	10.08	0	0	0	H			130	6.67	55.24	56.85	0	0.17	0	K
131	1.7	28.72	10.08	0	0.1	0	S			131	6.67	55.82	56.85	0	0.58	0	G
132	1.7	29.02	10.08	0	0.3	0	T			132	6.67	56.4	56.85	0	0.58	0	G
133	1.7	29.02	10.08	0	0	0	H			133	6.67	57.15	56.85	0	0.75	0	I
134	1.7	29.02	10.38	0	0	0.3	K			134	6.67	58.07	56.85	0	0.92	0	R
135	1.7	29.27	10.83	0	0.25	0.45	T			135	6.67	58.57	57.35	0	0.5	0.5	Y
136	1.7	29.47	10.83	0	0.2	0	P			136	6.67	59.32	57.35	0	0.75	0	A
137	1.7	29.57	10.83	0	0.1	0	T			137	6.67	59.39	58.19	0	0.07	0.85	L
138	1.7	29.87	10.83	0	0.3	0	K			138	6.67	60.06	58.19	0	0.67	0	D
139	1.7	29.87	10.83	0	0	0	G			139	6.67	60.14	58.19	0	0.08	0	V
140	1.7	30.27	10.83	0	0.4	0	G			140	6.67	60.47	58.94	0	0.33	0.75	N
141	1.7	30.67	10.83	0	0.4	0	I			141	6.67	60.69	59.39	0	0.22	0.44	E
142	1.7	31.07	10.83	0	0.4	0	R			142	6.67	61.5	60.58	0	0.81	1.19	S
143	1.7	31.07	10.83	0	0	0	F			143	6.67	62.25	60.58	0	0.75	0	E
144	1.7	31.47	10.83	0	0.4	0	S			144	6.67	63.25	60.58	0	1	0	V
145	1.7	31.47	10.83	0	0	0	L			145	6.67	64.08	60.58	0	0.83	0	K
146	1.7	31.67	10.83	0	0.2	0	D			146	6.67	64.42	60.58	0	0.33	0	A
147	1.7	31.87	10.83	0	0.2	0	V			147	6.67	65.42	61.17	0	1	0.58	L
148	1.7	32.07	10.83	0	0.2	0	S			148	6.67	65.83	61.17	0	0.42	0	A
149	1.7	32.07	10.83	0	0	0	R			149	6.67	66.5	61.33	0	0.67	0.17	A
150	1.7	32.07	10.83	0	0	0	D			150	6.67	66.75	61.42	0	0.25	0.08	I
151	1.7	32.37	10.83	0	0.3	0	E			151	6.67	66.75	61.42	0	0	0	M
152	1.7	32.47	10.83	0	0.1	0	V			152	6.67	67.58	61.5	0	0.83	0.08	T
153	1.7	32.47	10.83	0	0	0	K			153	6.67	67.67	61.5	0	0.08	0	F
154	1.7	32.47	10.83	0	0	0	A			154	6.67	67.67	61.5	0	0	0	K
155	1.7	32.77	10.83	0	0.3	0	L			155	6.67	67.92	61.5	0	0.25	0	C
156	1.7	33.07	10.83	0	0.3	0	S			156	6.67	68.83	61.5	0	0.92	0	A
157	1.7	33.47	10.83	0	0.4	0	A			157	6.67	69.25	61.58	0	0.42	0.08	C
158	1.7	33.47	10.83	0	0	0	L			158	6.67	70	61.58	0	0.75	0	V
159	1.7	33.47	10.83	0	0	0	M			159	6.67	70.25	61.58	0	0.25	0	N
160	1.7	33.47	10.83	0	0	0	T			160	6.67	70.75	62.42	0	0.5	0.83	V
161	1.7	33.47	10.83	0	0	0	F			161	6.67	71.58	62.42	0	0.83	0	P
162	1.7	33.47	10.83	0	0	0	K			162	6.67	71.75	62.83	0	0.17	0.42	Y
163	1.7	33.67	10.83	0	0.2	0	C			163	6.67	72.08	62.83	0	0.33	0	G
164	1.7	33.67	10.83	0	0	0	A			164	6.67	72.58	62.83	0	0.5	0	G
165	1.7	33.97	10.83	0	0.3	0	C			165	6.67	73.33	62.83	0	0.75	0	S
166	1.7	34.37	10.83	0	0.4	0	V			166	6.67	73.75	62.83	0	0.42	0	K
167	1.7	34.37	10.83	0	0	0	D			167	6.67	74.08	62.83	0	0.33	0	G
168	1.7	34.37	10.83	0	0	0	V			168	6.67	74.75	62.83	0	0.67	0	G
169	1.7	34.67	10.83	0	0.3	0	P			169	6.67	74.92	63.33	0	0.17	0.5	I
170	1.7	34.67	10.83	0	0	0	F			170	6.67	75.71	64.12	0	0.79	0.79	C
171	1.7	34.87	10.83	0	0.2	0	G			171	6.67	75.79	64.21	0	0.08	0.08	I
172	1.7	35.67	10.83	0	0.8	0	G			172	6.67	76.21	64.21	0	0.42	0	D
173	1.7	35.67	10.83	0	0	0	A			173	6.67	76.38	64.21	0	0.17	0	P
174	1.7	35.67	10.83	0	0	0	K			174	6.67	76.46	64.21	0	0.08	0	K
175	1.7	36.07	10.83	0	0.4	0	A			175	6.67	76.82	64.68	0	0.36	0.47	K
176	1.7	36.77	10.83	0	0.7	0	G			176	6.67	77.49	64.68	0	0.67	0	Y
177	1.7	36.87	10.83	0	0.1	0	L			177	6.67	78.36	65.06	0	0.88	0.38	T
178	1.7	36.87	10.83	0	0	0	K			178	6.67	78.89	65.36	0	0.53	0.31	V
179	1.7	36.87	10.83	0	0	0	I			179	6.67	79.13	66.79	0	0.24	1.43	D
180	1.7	37.17	10.83	0	0.3	0	N			180	6.67	79.71	66.79	0	0.58	0	E
181	1.7	38.17	10.83	0	1	0	P			181	6.67	80.38	66.79	0	0.67	0	L
182	1.7	38.17	10.83	0	0	0	K			182	6.67	80.54	66.79	0	0.17	0	Q
183	1.7	38.27	10.83	0	0.1	0	E			183	6.67	81.13	66.79	0	0.58	0	T
184	1.7	38.27	10.83	0	0	0	Y			184	6.67	81.54	66.79	0	0.42	0	I
185	1.7	38.47	10.83	0	0.2	0	S			185	6.67	82.04	66.79	0	0.5	0	T
186	1.7	38.57	10.83	0	0.1	0	E			186	6.67	82.71	66.79	0	0.67	0	R
187	1.7	38.97	10.83	0	0.4	0	H			187	6.67	83.38	66.79	0	0.67	0	R
188	1.7	38.97	10.83	0	0	0	E			188	6.67	83.71	66.79	0	0.33	0	Y
189	1.7	39.07	10.83	0	0.1	0	L			189	6.67	84.21	66.79	0	0.5	0	T
190	1.7	39.07	10.83	0	0	0	E			190	6.67	84.21	66.79	0	0	0	M
191	1.7	39.07	10.83	0	0	0	K			191	6.67	84.29	66.79	0	0.08	0	E
192	1.7	39.07	10.83	0	0	0	I			192	6.67	85.21	67.12	0	0.92	0.33	L
193	1.7	39.77	10.83	0	0.7	0	T			193	6.67	85.79	67.46	0	0.58	0.33	L
194	1.7	39.97	10.83	0	0.2	0	R			194	6.67	85.79	67.46	0	0	0	K
195	1.7	39.97	10.83	0	0	0	R			195	6.67	86.71	67.54	0	0.92	0.08	R
196	1.7	39.97	10.83	0	0	0	F			196	6.67	87.04	67.54	0	0.33	0	N
197	1.7	39.97	10.83	0	0	0	T			197	6.67	87.04	67.54	0	0	0	M
198	1.7	40.27	10.83	0	0.3	0	L			198	6.67	87.38	67.54	0	0.33	0	I
199	1.7	40.27	10.83	0	0	0	E			199	6.67	88.13	67.54	0	0.75	0	G
200	1.7	40.47	10.83	0	0.2	0	L			200	6.67	88.88	67.54	0	0.75	0	P
201	1.7	40.47	10.83	0	0	0	A			201	6.67	89.04	67.54	0	0.17	0	G
202	1.7	40.47	10.83	0	0	0	K			202	6.67	89.25	67.67	0	0.21	0.12	I
203	1.7	40.47	10.83	0	0	0	K			203	6.67	89.25	67.67	0	0	0	D
204	1.7	40.77	10.83	0	0.3	0	G			204	6.67	89.92	67.67	0	0.67	0	V
205	1.7	40.77	10.83	0	0	0	F			205	6.67	90.75	67.67	0	0.83	0	P
206	1.7	40.87	10.83	0	0.1	0	I			206	6.67	91.67	67.67	0	0.92	0	A
207	1.7	41.27	10.83	0	0.4	0	G			207	6.67	92.42	67.67	0	0.75	0	P
208	1.7	41.27	10.83	0	0	0	P			208	6.67	92.42	67.67	0	0	0	D
209	1.7	42.17	10.83	0	0.9	0	G			209	6.67	92.83	67.67	0	0.42	0	V
210	1.7	42.47	10.83	0	0.3	0	V			210	6.67	93.08	67.67	0	0.25	0	N
211	1.7	42.47	10.83	0	0	0	D			211	6.67	93.75	67.67	0	0.67	0	T
212	1.7	42.47	10.83	0	0	0	V			212	6.67	94.08	68.25	0	0.33	0.58	G
213	1.7	42.67	10.83	0	0.2	0	P			213	6.67	94.58	68.58	0	0.5	0.33	P
214	1.7	43.07	10.83	0	0.4	0	A			214	6.67	95.33	68.58	0	0.75	0	R
215	1.7	43.17	10.83	0	0.1	0	P			215	6.67	95.58	68.58	0	0.25	0	E
216	1.7	43.67	10.83	0	0.5	0	D			216	6.67	95.58	68.58	0	0	0	M
217	1.7	43.67	10.83	0	0	0	M			217	6.67	95.58	69.25	0	0	0.67	S
218	1.7	44.17	10.83	0	0.5	0	G			218	6.67	95.58	69.25	0	0	0	W
219	1.7	44.57	10.83	0	0.4	0	T			219	6.67	96.13	69.62	0	0.54	0.38	I
220	1.7	45.37	10.83	0	0.8	0	G			220	6.67	97.04	69.96	0	0.92	0.33	V
221	1.7	45.37	10.83	0	0	0	E			221	6.67	97.29	69.96	0	0.25	0	D
222	1.7	45.77	10.83	0	0.4	0	R			222	6.67	97.38	69.96	0	0.08	0	Q
223	1.7	45.77	10.83	0	0	0	E			223	6.67	97.79	69.96	0	0.42	0	Y
224	1.7	45.77	10.83	0	0	0	M			224	6.67	97.96	71.54	0	0.17	1.58	Q
225	1.7	45.87	10.83	0	0.1	0	S			225	6.67	98.04	71.54	0	0.08	0	K
226	1.7	45.87	10.83	0	0	0	W			226	6.67	98.71	71.54	0	0.67	0	T
227	1.7	45.97	10.83	0	0.1	0	I			227	6.67	98.88	71.54	0	0.17	0	F
228	1.7	46.07	10.83	0	0.1	0	A			228	6.67	99.13	71.54	0	0.25	0	G
229	1.7	46.37	10.83	0	0.3	0	D			229	6.67	99.29	71.87	0	0.17	0.33	Y
230	1.7	47.17	10.83	0	0.8	0	T			230	6.67	99.29	71.87	0	0	0	K
231	1.7	47.27	10.83	0	0.1	0	Y			231	6.67	100.04	71.87	0	0.75	0	D
232	1.7	47.27	10.83	0	0	0	A			232	6.67	100.29	71.87	0	0.25	0	I
233	1.7	47.27	10.83	0	0	0	K			233	6.67	100.46	71.96	0	0.17	0.08	N
234	1.7	47.27	10.83	0	0	0	T			234	6.67	101.21	72.71	0	0.75	0.75	S
235	1.7	47.47	10.83	0	0.2	0	I			235	6.67	101.46	73.62	0	0.25	0.92	S
236	1.7	48.07	10.83	0	0.6	0	G			236	6.67	102.21	73.62	0	0.75	0	A
237	1.7	48.37	10.83	0	0.3	0	H			237	6.67	102.29	73.62	0	0.08	0	I
238	1.7	48.87	10.83	0	0.5	0	L			238	6.67	102.79	73.96	0	0.5	0.33	V
239	1.7	48.97	10.83	0	0.1	0	D			239	6.67	103.54	73.96	0	0.75	0	T
240	1.7	48.97	10.83	0	0	0	I			240	6.67	103.96	73.96	0	0.42	0	G
241	1.7	48.97	10.83	0	0	0	N			241	6.67	104.29	73.96	0	0.33	0	K
242	1.7	49.87	10.83	0	0.9	0	A			242	6.67	104.96	73.96	0	0.67	0	P
243	1.7	49.97	10.83	0	0.1	0	H			243	6.67	105.96	74.21	0	1	0.25	V
244	1.7	50.17	10.83	0	0.2	0	A			244	6.67	106.04	74.37	0	0.08	0.17	H
245	1.7	50.17	10.83	0	0	0	C			245	6.67	106.78	75.47	0	0.74	1.1	N
246	1.7	50.27	10.83	0	0.1	0	V			246	6.67	107.03	75.47	0	0.25	0	G
247	1.7	50.57	10.83	0	0.3	0	T			247	6.67	107.19	75.47	0	0.17	0	G
248	1.7	50.57	10.83	0	0	0	G			248	6.67	108.03	75.56	0	0.83	0.08	I
249	1.7	50.67	10.83	0	0.1	0	K			249	6.67	108.19	75.72	0	0.17	0.17	N
250	1.7	50.67	10.83	0	0	0	P			250	6.67	108.86	75.72	0	0.67	0	G
251	1.7	50.67	10.83	0	0	0	I			251	6.67	109.78	75.72	0	0.92	0	R
252	1.7	50.67	10.83	0	0	0	N			252	6.67	110.19	76.81	0	0.42	1.08	H
253	1.7	50.67	10.83	0	0	0	Q			253	6.67	110.28	77.39	0	0.08	0.58	S
254	1.7	50.87	10.83	0	0.2	0	G			254	6.67	110.69	77.39	0	0.42	0	A
255	1.7	51.67	10.83	0	0.8	0	G			255	6.67	111.19	77.39	0	0.5	0	T
256	1.7	51.97	10.83	0	0.3	0	I			256	6.67	111.53	77.39	0	0.33	0	G
257	1.7	52.17	10.83	0	0.2	0	H			257	6.67	112.44	77.64	0	0.92	0.25	R
258	1.7	52.17	10.83	0	0	0	G			258	6.67	112.94	77.64	0	0.5	0	G
259	1.7	52.57	10.83	0	0.4	0	R			259	6.67	113.61	77.64	0	0.67	0	V
260	1.7	52.57	10.83	0	0	0	V			260	6.67	113.61	77.64	0	0	0	W
261	1.7	52.67	10.83	0	0.1	0	S			261	6.67	113.78	77.64	0	0.17	0	K
262	1.7	52.67	10.83	0	0	0	A			262	6.67	114.19	78.22	0	0.42	0.58	A
263	1.7	52.77	10.83	0	0.1	0	T			263	6.67	114.69	78.31	0	0.5	0.08	G
264	1.7	52.97	10.83	0	0.2	0	G			264	6.67	114.86	78.39	0	0.17	0.08	D
265	1.7	53.07	10.83	0	0.1	0	R			265	6.67	115.19	79.06	0	0.33	0.67	L
266	1.7	53.47	10.83	0	0.4	0	G			266	6.67	115.69	79.06	0	0.5	0	F
267	1.7	53.47	10.83	0	0	0	V			267	6.67	116.32	79.26	0	0.62	0.21	L
268	1.7	53.57	10.83	0	0.1	0	F			268	6.67	116.57	80.01	0	0.25	0.75	K
269	1.7	53.57	10.83	0	0	0	H			269	6.67	117.07	80.01	0	0.5	0	D
270	1.7	53.87	10.83	0	0.3	0	G			270	6.67	117.49	80.01	0	0.42	0	K
271	1.7	53.87	10.83	0	0	0	L			271	6.67	117.99	80.43	0	0.5	0.42	E
272	1.7	53.87	10.83	0	0	0	E			272	6.67	117.99	80.43	0	0	0	W
273	1.7	53.97	10.83	0	0.1	0	N			273	6.67	117.99	80.43	0	0	0	M
274	1.7	53.97	10.83	0	0	0	F			274	6.67	118.07	80.43	0	0.08	0	D
275	1.7	54.07	10.83	0	0.1	0	I			275	6.67	119.07	80.68	0	1	0.25	L
276	1.7	54.17	10.83	0	0.1	0	N			276	6.67	119.74	81.51	0	0.67	0.83	L
277	1.7	54.17	10.83	0	0	0	E			277	6.67	120.15	82.85	0	0.42	1.33	K
278	1.7	54.17	10.83	0	0	0	A			278	6.67	120.26	84.07	0	0.11	1.22	W
279	1.7	54.17	10.93	0	0	0.1	N			279	6.67	120.43	84.32	0	0.17	0.25	K
280	1.7	54.17	10.93	0	0	0	Y			280	6.67	120.93	84.32	0	0.5	0	T
281	1.7	54.17	10.93	0	0	0	M			281	6.67	121.76	84.32	0	0.83	0	G
282	1.7	54.17	10.93	0	0	0	S			282	6.67	121.76	84.32	0	0	0	W
283	1.7	54.27	11.53	0	0.1	0.6	Q			283	6.67	122.1	84.74	0	0.33	0.42	K
284	1.7	54.87	11.53	0	0.6	0	I			284	6.67	122.26	84.74	0	0.17	0	D
285	1.7	54.87	11.53	0	0	0	G			285	6.67	122.51	84.74	0	0.25	0	K
286	1.7	54.87	11.53	0	0	0	T			286	6.67	122.76	85.65	0	0.25	0.92	T
287	1.7	55.07	11.53	0	0.2	0	T			287	6.67	123.01	85.99	0	0.25	0.33	V
288	1.7	55.07	11.53	0	0	0	P			288	6.67	124.01	86.07	0	1	0.08	I
289	1.7	55.07	11.53	0	0	0	G			289	6.67	124.76	86.07	0	0.75	0	V
290	1.7	55.07	11.53	0	0	0	W			290	6.67	124.85	86.07	0	0.08	0	Q
291	1.7	55.07	11.53	0	0	0	G			291	6.67	125.51	86.07	0	0.67	0	G
292	1.7	55.07	11.53	0	0	0	G			292	6.67	126.01	86.07	0	0.5	0	F
293	1.7	55.07	11.53	0	0	0	K			293	6.67	126.1	86.07	0	0.08	0	G
294	1.7	55.27	11.63	0	0.2	0.1	T			294	6.67	126.26	86.07	0	0.17	0	N
295	1.7	55.27	11.63	0	0	0	F			295	6.67	126.76	86.07	0	0.5	0	V
296	1.7	55.57	11.63	0	0.3	0	I			296	6.67	127.1	86.07	0	0.33	0	G
297	1.7	56.07	11.63	0	0.5	0	V			297	6.67	127.6	86.15	0	0.5	0.08	S
298	1.7	56.07	11.63	0	0	0	Q			298	6.67	127.76	86.15	0	0.17	0	F
299	1.7	56.07	11.63	0	0	0	G			299	6.67	128.1	86.15	0	0.33	0	A
300	1.7	56.07	11.63	0	0	0	F			300	6.67	128.93	86.24	0	0.83	0.08	A
301	1.7	56.57	11.63	0	0.5	0	G			301	6.67	129.43	86.24	0	0.5	0	K
302	1.7	56.97	11.63	0	0.4	0	N			302	6.67	129.51	86.99	0	0.08	0.75	Y
303	1.7	57.37	11.63	0	0.4	0	V			303	6.67	130.14	87.19	0	0.62	0.21	V
304	1.7	57.57	11.63	0	0.2	0	G			304	6.67	130.56	87.36	0	0.42	0.17	H
305	1.7	57.67	11.63	0	0.1	0	L			305	6.67	130.97	87.61	0	0.42	0.25	E
306	1.7	57.67	11.63	0	0	0	H			306	6.67	131.56	87.69	0	0.58	0.08	A
307	1.7	57.67	11.63	0	0	0	T			307	6.67	131.81	87.69	0	0.25	0	G
308	1.7	58.67	11.63	0	1	0	T			308	6.67	131.97	87.78	0	0.17	0.08	A
309	1.7	58.67	11.63	0	0	0	R			309	6.67	132.56	87.78	0	0.58	0	K
310	1.7	58.77	11.63	0	0.1	0	Y			310	6.67	133.47	87.94	0	0.92	0.17	V
311	1.7	58.97	11.63	0	0.2	0	L			311	6.67	134.18	88.07	0	0.71	0.12	I
312	1.7	59.27	11.63	0	0.3	0	T			312	6.67	135.1	88.07	0	0.92	0	G
313	1.7	59.57	11.63	0	0.3	0	R			313	6.67	135.93	88.24	0	0.83	0.17	I
314	1.7	59.87	11.63	0	0.3	0	A			314	6.67	136.68	88.65	0	0.75	0.42	K
315	1.7	60.57	11.63	0	0.7	0	G			315	6.67	136.68	88.65	0	0	0	E
316	1.7	60.57	11.63	0	0	0	A			316	6.67	136.89	89.03	0	0.21	0.38	F
317	1.7	60.57	11.63	0	0	0	T			317	6.67	137.06	89.11	0	0.17	0.08	D
318	1.7	60.67	11.63	0	0.1	0	C			318	6.67	137.47	89.94	0	0.42	0.83	V
319	1.7	60.87	11.73	0	0.2	0.1	I			319	6.67	138.18	90.24	0	0.71	0.29	S
320	1.7	61.17	11.73	0	0.3	0	G			320	6.67	138.68	90.49	0	0.5	0.25	L
321	1.7	61.67	11.73	0	0.5	0	V			321	6.67	139.46	92.12	0	0.78	1.64	V
322	1.7	61.87	11.73	0	0.2	0	I			322	6.67	139.96	92.12	0	0.5	0	N
323	1.7	61.87	11.73	0	0	0	E			323	6.67	140.33	93.08	0	0.38	0.96	K
324	1.7	61.97	11.73	0	0.1	0	H			324	6.67	140.75	93.17	0	0.42	0.08	D
325	1.7	62.07	11.73	0	0.1	0	D			325	6.67	141.42	93.17	0	0.67	0	G
326	1.7	62.37	11.73	0	0.3	0	G			326	6.67	142.42	93.17	0	1	0	I
327	1.7	62.57	11.73	0	0.2	0	T			327	6.67	142.67	93.17	0	0.25	0	D
328	1.7	62.87	11.73	0	0.3	0	L			328	6.67	142.92	93.25	0	0.25	0.08	I
329	1.7	62.87	12.13	0	0	0.4	Y			329	6.67	142.92	93.58	0	0	0.33	N
330	1.7	62.97	12.13	0	0.1	0	N			330	6.67	143.08	93.58	0	0.17	0	D
331	1.7	63.57	12.13	0	0.6	0	P			331	6.67	143.75	93.83	0	0.67	0.25	L
332	1.7	63.57	12.13	0	0	0	E			332	6.67	144.04	94.87	0	0.29	1.04	F
333	1.7	63.77	12.13	0	0.2	0	G			333	6.67	144.25	95.83	0	0.21	0.96	E
334	1.7	63.87	12.13	0	0.1	0	I			334	6.67	144.67	96.08	0	0.42	0.25	Y
335	1.7	64.27	12.13	0	0.4	0	D			335	6.67	145.18	97.32	0	0.51	1.24	T
336	1.7	65.27	12.13	0	1	0	P			336	6.67	145.47	98.36	0	0.29	1.04	E
337	1.7	65.47	12.13	0	0.2	0	K			337	6.67	145.76	98.65	0	0.29	0.29	E
338	1.7	65.67	12.13	0	0.2	0	L			338	6.67	145.85	98.74	0	0.08	0.08	K
339	1.7	65.67	12.13	0	0	0	L			339	6.67	146.46	98.96	0	0.61	0.22	K
340	1.7	65.77	12.13	0	0.1	0	E			340	6.67	147.29	99.29	0	0.83	0.33	T
341	1.7	65.77	12.13	0	0	0	D			341	6.67	147.88	99.46	0	0.58	0.17	I
342	1.7	65.77	12.13	0	0	0	Y			342	6.67	148.62	99.46	0	0.75	0	K
343	1.7	65.77	12.13	0	0	0	K			343	6.67	149.46	99.46	0	0.83	0	G
344	1.7	65.77	12.13	0	0	0	N			344	6.67	149.71	99.46	0	0.25	0	Y
345	1.7	65.77	12.13	0	0	0	E			345	6.67	150.38	99.71	0	0.67	0.25	P
346	1.7	65.87	12.13	0	0.1	0	H			346	6.67	151.04	99.79	0	0.67	0.08	K
347	1.7	65.87	12.13	0	0	0	G			347	6.67	151.79	99.87	0	0.75	0.08	A
348	1.7	65.87	12.13	0	0	0	T			348	6.67	152.04	100.79	0	0.25	0.92	Q
349	1.7	66.17	12.43	0	0.3	0.3	I			349	6.67	152.38	100.87	0	0.33	0.08	E
350	1.7	66.67	12.43	0	0.5	0	V			350	6.67	153.21	101.37	0	0.83	0.5	S
351	1.7	66.77	12.43	0	0.1	0	G			351	6.67	153.46	101.96	0	0.25	0.58	K
352	1.7	67.07	12.43	0	0.3	0	Y			352	6.67	153.62	102.21	0	0.17	0.25	E
353	1.7	67.27	13.03	0	0.2	0.6	Q			353	6.67	154.29	102.96	0	0.67	0.75	D
354	1.7	67.67	13.03	0	0.4	0	N			354	6.67	155.08	103.5	0	0.79	0.54	L
355	1.7	67.67	13.03	0	0	0	A			355	6.67	156	103.67	0	0.92	0.17	L
356	1.7	67.67	13.03	0	0	0	K			356	6.67	156.72	105.28	0	0.72	1.61	V
357	1.7	67.87	13.03	0	0.2	0	P			357	6.67	157.14	105.28	0	0.42	0	A
358	1.7	67.97	13.03	0	0.1	0	Y			358	6.67	157.39	105.78	0	0.25	0.5	E
359	1.7	67.97	13.03	0	0	0	E			359	6.67	157.72	107.36	0	0.33	1.58	T
360	1.7	68.07	13.03	0	0.1	0	G			360	6.67	158.14	107.44	0	0.42	0.08	D
361	1.7	68.07	13.03	0	0	0	E			361	6.67	158.81	107.44	0	0.67	0	I
362	1.7	68.07	13.03	0	0	0	N			362	6.67	159.72	107.94	0	0.92	0.5	L
363	1.7	68.57	13.03	0	0.5	0	L			363	6.67	159.76	108.15	0	0.04	0.21	M
364	1.7	68.57	13.03	0	0	0	M			364	6.67	160.6	108.15	0	0.83	0	P
365	1.7	68.67	13.13	0	0.1	0.1	F			365	6.67	160.93	108.15	0	0.33	0	C
366	1.7	68.67	13.13	0	0	0	E			366	6.67	161.1	108.15	0	0.17	0	A
367	1.7	68.77	13.53	0	0.1	0.4	K			367	6.67	161.76	108.15	0	0.67	0	T
368	1.7	68.87	13.53	0	0.1	0	C			368	6.67	162.26	108.15	0	0.5	0	Q
369	1.7	68.87	13.53	0	0	0	D			369	6.67	162.85	108.15	0	0.58	0	K
370	1.7	68.97	13.53	0	0.1	0	I			370	6.67	163.51	108.15	0	0.67	0	V
371	1.7	69.07	13.53	0	0.1	0	F			371	6.67	164.1	108.24	0	0.58	0.08	I
372	1.7	69.07	13.53	0	0	0	I			372	6.67	164.18	108.24	0	0.08	0	T
373	1.7	69.97	13.53	0	0.9	0	P			373	6.67	164.51	108.99	0	0.33	0.75	T
374	1.7	70.17	13.53	0	0.2	0	A			374	6.67	164.6	109.74	0	0.08	0.75	D
375	1.7	70.27	13.53	0	0.1	0	A			375	6.67	164.85	109.74	0	0.25	0	N
376	1.7	70.47	13.63	0	0.2	0.1	V			376	6.67	165.35	109.74	0	0.5	0	A
377	1.7	70.47	13.63	0	0	0	E			377	6.67	165.92	110.67	0	0.57	0.93	K
378	1.7	70.47	13.63	0	0	0	K			378	6.67	166.42	111	0	0.5	0.33	D
379	1.7	70.57	13.63	0	0.1	0	V			379	6.67	166.83	111.25	0	0.42	0.25	I
380	1.7	70.57	13.63	0	0	0	I			380	6.67	167.17	111.25	0	0.33	0	K
381	1.7	70.67	14.03	0	0.1	0.4	T			381	6.67	167.5	111.25	0	0.33	0	A
382	1.7	70.67	14.03	0	0	0	S			382	6.67	168.17	111.25	0	0.67	0	K
383	1.7	70.67	14.03	0	0	0	E			383	6.67	168.83	111.42	0	0.67	0.17	L
384	1.7	70.67	14.03	0	0	0	N			384	6.67	169.67	111.42	0	0.83	0	I
385	1.7	71.07	14.03	0	0.4	0	A			385	6.67	170	111.42	0	0.33	0	L
386	1.7	71.07	15.03	0	0	1	N			386	6.67	170.58	111.42	0	0.58	0	E
387	1.7	71.97	15.63	0	0.9	0.6	R			387	6.67	171	111.42	0	0.42	0	G
388	1.7	72.67	15.73	0	0.7	0.1	I			388	6.67	171.17	111.42	0	0.17	0	A
389	1.7	72.67	15.73	0	0	0	Q			389	6.67	171.83	111.42	0	0.67	0	N
390	1.7	73.07	16.33	0	0.4	0.6	A			390	6.67	172.67	111.42	0	0.83	0	G
391	1.7	73.27	16.33	0	0.2	0	K			391	6.67	173.58	111.42	0	0.92	0	P
392	1.7	73.27	16.33	0	0	0	I			392	6.67	174.17	111.42	0	0.58	0	T
393	1.7	73.27	16.33	0	0	0	I			393	6.67	174.75	111.42	0	0.58	0	T
394	1.7	73.37	16.33	0	0.1	0	A			394	6.67	175.08	111.42	0	0.33	0	P
395	1.7	73.57	16.33	0	0.2	0	E			395	6.67	175.42	112.17	0	0.33	0.75	S
396	1.7	73.67	16.33	0	0.1	0	A			396	6.67	175.83	112.5	0	0.42	0.33	G
397	1.7	73.67	16.33	0	0	0	A			397	6.67	176.25	112.5	0	0.42	0	E
398	1.7	73.67	16.33	0	0	0	N			398	6.67	176.92	112.67	0	0.67	0.17	K
399	1.7	74.17	16.33	0	0.5	0	G			399	6.67	177.33	112.75	0	0.42	0.08	I
400	1.7	74.47	16.33	0	0.3	0	P			400	6.67	178	112.75	0	0.67	0	L
401	1.7	74.67	16.33	0	0.2	0	T			401	6.67	178.58	113.17	0	0.58	0.42	L
402	1.7	75.37	16.33	0	0.7	0	T			402	6.67	178.83	113.5	0	0.25	0.33	D
403	1.7	75.67	16.33	0	0.3	0	P			403	6.67	179.12	113.71	0	0.29	0.21	K
404	1.7	75.67	16.33	0	0	0	A			404	6.67	179.85	114.15	0	0.72	0.44	G
405	1.7	75.77	16.33	0	0.1	0	A			405	6.67	180.51	114.24	0	0.67	0.08	V
406	1.7	75.97	16.33	0	0.2	0	D			406	6.67	181.1	114.57	0	0.58	0.33	L
407	1.7	76.17	16.33	0	0.2	0	K			407	6.67	181.89	115.11	0	0.79	0.54	L
408	1.7	76.57	16.33	0	0.4	0	I			408	6.67	182.31	115.28	0	0.42	0.17	V
409	1.7	76.97	16.33	0	0.4	0	L			409	6.67	182.72	115.28	0	0.42	0	P
410	1.7	77.57	16.33	0	0.6	0	I			410	6.67	182.97	115.28	0	0.25	0	D
411	1.7	77.57	16.43	0	0	0.1	D			411	6.67	183.51	115.65	0	0.54	0.38	L
412	1.7	77.67	16.43	0	0.1	0	R			412	6.67	183.76	115.74	0	0.25	0.08	Y
413	1.7	77.67	16.43	0	0	0	N			413	6.67	184.1	115.74	0	0.33	0	C
414	1.7	78.07	16.43	0	0.4	0	I			414	6.67	184.18	115.74	0	0.08	0	N
415	1.7	78.47	16.43	0	0.4	0	L			415	6.67	185.01	115.74	0	0.83	0	A
416	1.7	78.57	16.43	0	0.1	0	V			416	6.67	185.26	115.74	0	0.25	0	G
417	1.7	79.47	16.43	0	0.9	0	I			417	6.67	185.93	115.74	0	0.67	0	G
418	1.7	79.57	16.43	0	0.1	0	P			418	6.67	186.43	115.74	0	0.5	0	V
419	1.7	79.67	16.43	0	0.1	0	D			419	6.67	187.26	115.74	0	0.83	0	T
420	1.7	79.87	16.43	0	0.2	0	L			420	6.67	187.93	115.74	0	0.67	0	V
421	1.7	80.17	16.43	0	0.3	0	Y			421	6.67	188.26	115.74	0	0.33	0	S
422	1.7	80.17	16.43	0	0	0	I			422	6.67	188.68	115.74	0	0.42	0	Y
423	1.7	80.67	16.43	0	0.5	0	N			423	6.67	189.26	115.74	0	0.58	0	F
424	1.7	81.17	16.43	0	0.5	0	A			424	6.67	189.6	115.74	0	0.33	0	E
425	1.7	81.37	16.43	0	0.2	0	G			425	6.67	190.18	115.74	0	0.58	0	Y
426	1.7	81.37	16.43	0	0	0	G			426	6.67	190.93	115.82	0	0.75	0.08	L
427	1.7	81.47	16.43	0	0.1	0	V			427	6.67	191.43	115.82	0	0.5	0	K
428	1.7	81.67	16.43	0	0.2	0	T			428	6.67	191.76	115.82	0	0.33	0	N
429	1.7	81.67	16.43	0	0	0	V			429	6.67	192.26	115.82	0	0.5	0	I
430	1.7	81.87	16.43	0	0.2	0	S			430	6.67	192.68	115.82	0	0.42	0	N
431	1.7	81.87	16.43	0	0	0	F			431	6.67	193.35	115.82	0	0.67	0	H
432	1.7	81.97	16.43	0	0.1	0	F			432	6.67	193.68	115.82	0	0.33	0	V
433	1.7	82.07	16.43	0	0.1	0	E			433	6.67	194.43	115.99	0	0.75	0.17	S
434	1.7	82.07	16.43	0	0	0	W			434	6.67	194.85	115.99	0	0.42	0	Y
435	1.7	82.47	16.43	0	0.4	0	L			435	6.67	195.1	115.99	0	0.25	0	G
436	1.7	82.47	16.43	0	0	0	K			436	6.67	195.64	116.11	0	0.54	0.12	K
437	1.7	82.47	16.43	0	0	0	N			437	6.67	195.64	116.11	0	0	0	M
438	1.7	82.87	16.43	0	0.4	0	L			438	6.67	196.01	116.49	0	0.38	0.38	N
439	1.7	82.97	16.43	0	0.1	0	N			439	6.67	196.97	116.69	0	0.96	0.21	S
440	1.7	83.47	16.43	0	0.5	0	H			440	6.67	197.56	116.78	0	0.58	0.08	K
441	1.7	83.47	16.43	0	0	0	V			441	6.67	198.36	118.22	0	0.81	1.44	S
442	1.7	83.87	16.43	0	0.4	0	S			442	6.67	198.94	118.47	0	0.58	0.25	T
443	1.7	83.87	16.43	0	0	0	Y			443	6.67	199.44	118.47	0	0.5	0	S
444	1.7	83.87	16.43	0	0	0	G			444	6.67	199.53	119.14	0	0.08	0.67	E
445	1.7	84.07	16.43	0	0.2	0	R			445	6.67	200.26	119.49	0	0.74	0.35	L
446	1.7	84.17	16.43	0	0.1	0	L			446	6.67	200.51	119.49	0	0.25	0	I
447	1.7	84.27	16.43	0	0.1	0	T			447	6.67	200.85	120.9	0	0.33	1.42	I
448	1.7	84.27	16.43	0	0	0	F			448	6.67	201.47	121.19	0	0.62	0.29	E
449	1.7	84.37	16.43	0	0.1	0	K			449	6.67	201.88	122.04	0	0.4	0.85	L
450	1.7	84.67	16.43	0	0.3	0	Y			450	6.67	202	123	0	0.12	0.96	M
451	1.7	84.87	16.43	0	0.2	0	E			451	6.67	202.42	123.08	0	0.42	0.08	N
452	1.7	84.97	16.43	0	0.1	0	R			452	6.67	203	123.08	0	0.58	0	S
453	1.7	85.17	16.43	0	0.2	0	E			453	6.67	203.33	123.08	0	0.33	0	I
454	1.7	85.17	16.43	0	0	0	S			454	6.67	203.83	123.08	0	0.5	0	N
455	1.7	85.17	16.43	0	0	0	N			455	6.67	204.17	123.17	0	0.33	0.08	E
456	1.7	85.47	16.43	0	0.3	0	Y			456	6.67	205.08	123.17	0	0.92	0	S
457	1.7	85.47	16.43	0	0	0	H			457	6.67	205.83	123.92	0	0.75	0.75	L
458	1.7	85.77	16.43	0	0.3	0	L			458	6.67	206	125.33	0	0.17	1.42	H
459	1.7	86.77	16.43	0	1	0	L			459	6.67	206.32	126.76	0	0.32	1.43	E
460	1.7	86.77	16.43	0	0	0	E			460	6.67	206.81	127.19	0	0.49	0.43	C
461	1.7	87.07	16.43	0	0.3	0	S			461	6.67	207.35	128.57	0	0.54	1.38	P
462	1.7	87.97	16.43	0	0.9	0	V			462	6.83	207.35	129.15	0.17	0	0.58	D
463	1.7	87.97	16.43	0	0	0	Q			463	7.08	207.64	129.94	0.25	0.29	0.79	S
464	1.7	88.07	16.43	0	0.1	0	E			464	7.17	207.64	131.11	0.08	0	1.17	-
465	1.7	88.17	16.43	0	0.1	0	S			465	7.17	208.54	132.54	0	0.9	1.43	L
466	1.7	88.27	16.43	0	0.1	0	L			466	7.17	209.29	132.54	0	0.75	0	P
467	1.7	88.27	16.43	0	0	0	E			467	7.17	209.44	134.39	0	0.15	1.85	N
468	1.7	88.27	16.43	0	0	0	R			468	7.17	210.28	134.64	0	0.83	0.25	I
469	1.7	88.57	16.43	0	0.3	0	R			469	7.17	210.57	136.93	0	0.29	2.29	C
470	1.7	88.97	16.43	0	0.4	0	F			470	7.17	210.99	137.1	0	0.42	0.17	P
471	1.7	89.37	16.43	0	0.4	0	G			471	7.17	211.49	137.26	0	0.5	0.17	N
472	1.7	89.57	16.43	0	0.2	0	R			472	7.17	212.01	137.9	0	0.53	0.64	K
473	1.7	89.97	16.43	0	0.4	0	V			473	7.17	212.39	139.28	0	0.38	1.38	K
474	1.7	90.07	16.43	0	0.1	0	G			474	7.17	213.14	139.36	0	0.75	0.08	L
475	1.7	90.37	16.43	0	0.3	0	G			475	7.17	213.47	139.94	0	0.33	0.58	K
476	1.7	90.47	16.43	0	0.1	0	R			476	7.17	213.76	140.9	0	0.29	0.96	R
477	1.7	91.07	16.43	0	0.6	0	I			477	7.17	214.22	141.19	0	0.46	0.29	I
478	1.7	91.07	16.43	0	0	0	P			478	7.17	214.76	142.24	0	0.54	1.04	Q
479	1.7	91.47	16.43	0	0.4	0	V			479	7.17	214.85	143.82	0	0.08	1.58	Q
480	1.7	91.87	16.43	0	0.4	0	T			480	7.17	214.85	143.99	0	0	0.17	C
481	1.7	92.27	16.43	0	0.4	0	P			481	7.17	215.01	144.24	0	0.17	0.25	T
482	1.7	92.67	16.43	0	0.4	0	S			482	7.17	215.72	145.03	0	0.71	0.79	T
483	1.7	92.77	16.43	0	0.1	0	E			483	7.17	215.89	145.03	0	0.17	0	E
484	1.7	92.77	16.43	0	0	0	S			484	7.25	216.47	145.11	0.08	0.58	0.08	A
485	1.7	92.77	16.43	0	0	0	F			485	7.25	216.97	145.28	0	0.5	0.17	D
486	1.7	92.77	16.43	0	0	0	Q			486	7.25	217.81	145.28	0	0.83	0	I
487	1.7	92.87	16.43	0	0.1	0	K			487	7.25	218.01	145.4	0	0.21	0.12	V
488	1.7	92.97	16.43	0	0.1	0	R			488	7.25	218.85	145.4	0	0.83	0	D
489	1.7	92.97	16.43	0	0	0	I			489	7.25	219.6	146.24	0	0.75	0.83	S
490	1.7	93.37	16.43	0	0.4	0	S			490	7.25	220.01	146.24	0	0.42	0	A
491	1.7	93.57	16.43	0	0.2	0	G			491	7.25	220.93	146.32	0	0.92	0.08	L
492	1.7	93.67	16.43	0	0.1	0	A			492	7.25	221.18	146.32	0	0.25	0	Q
493	1.7	93.77	16.43	0	0.1	0	S			493	7.25	222.01	146.32	0	0.83	0	T
494	1.7	93.77	16.43	0	0	0	E			494	7.25	222.51	146.4	0	0.5	0.08	V
495	1.7	93.77	16.43	0	0	0	K			495	7.25	222.51	146.49	0	0	0.08	M
496	1.7	94.37	16.43	0	0.6	0	D			496	7.25	222.76	146.49	0	0.25	0	E
497	1.7	94.67	16.43	0	0.3	0	I			497	7.25	223.39	146.94	0	0.62	0.46	S
498	1.7	94.97	16.43	0	0.3	0	V			498	7.25	224.31	147.44	0	0.92	0.5	A
499	1.7	94.97	16.43	0	0	0	H			499	7.25	224.97	147.86	0	0.67	0.42	A
500	1.7	95.37	16.43	0	0.4	0	S			500	7.25	225.26	149.4	0	0.29	1.54	R
501	1.7	95.67	16.43	0	0.3	0	G			501	7.25	225.76	149.4	0	0.5	0	G
502	1.7	95.67	16.43	0	0	0	L			502	7.25	226.01	149.49	0	0.25	0.08	I
503	1.7	95.97	16.43	0	0.3	0	D			503	7.25	226.18	149.49	0	0.17	0	K
504	1.7	96.17	16.43	0	0.2	0	Y			504	7.25	226.38	150.88	0	0.19	1.39	E
505	1.7	96.27	16.43	0	0.1	0	T			505	7.25	226.64	151.94	0	0.26	1.07	M
506	1.7	96.27	16.43	0	0	0	M			506	7.25	227.06	151.94	0	0.42	0	A
507	1.7	96.27	16.43	0	0	0	E			507	7.25	227.56	152.86	0	0.5	0.92	H
508	1.7	96.77	16.43	0	0.5	0	R			508	7.25	228.14	152.94	0	0.58	0.08	K
509	1.7	97.17	16.43	0	0.4	0	S			509	7.25	228.64	153.03	0	0.5	0.08	F
510	1.7	97.77	16.43	0	0.6	0	A			510	7.25	229.35	153.4	0	0.71	0.38	E
511	1.7	98.17	16.43	0	0.4	0	R			511	7.25	230.1	153.9	0	0.75	0.5	L
512	1.7	98.17	16.43	0	0	0	A			512	7.25	230.94	154.22	0	0.85	0.32	C
513	1.7	98.27	16.43	0	0.1	0	I			513	7.25	231.28	154.31	0	0.33	0.08	N
514	1.7	98.27	16.43	0	0	0	M			514	7.25	231.36	154.31	0	0.08	0	D
515	1.7	98.27	16.43	0	0	0	K			515	7.25	231.99	154.43	0	0.62	0.12	L
516	1.7	98.97	16.43	0	0.7	0	T			516	7.25	232.9	154.43	0	0.92	0	R
517	1.7	99.07	16.43	0	0.1	0	A			517	7.25	233.44	155.56	0	0.54	1.12	R
518	1.7	99.07	16.43	0	0	0	M			518	7.25	233.94	155.56	0	0.5	0	A
519	1.7	99.47	16.43	0	0.4	0	K			519	7.25	234.19	155.64	0	0.25	0.08	A
520	1.7	99.47	16.43	0	0	0	Y			520	7.25	234.69	155.64	0	0.5	0	Y
521	1.7	99.57	16.43	0	0.1	0	N			521	7.25	235.44	156.47	0	0.75	0.83	V
522	1.7	99.77	16.43	0	0.2	0	L			522	7.25	235.46	157.04	0	0.01	0.57	W
523	1.7	100.27	16.43	0	0.5	0	G			523	7.25	236.38	157.04	0	0.92	0	S
524	1.7	100.37	16.43	0	0.1	0	L			524	7.25	237	158.5	0	0.62	1.46	S
525	1.7	100.57	16.43	0	0.2	0	D			525	7.25	237.54	158.71	0	0.54	0.21	F
526	1.7	101.07	16.43	0	0.5	0	L			526	7.25	237.71	158.71	0	0.17	0	K
527	1.7	101.07	16.43	0	0	0	R			527	7.25	238.46	158.71	0	0.75	0	I
528	1.7	101.07	16.43	0	0	0	T			528	7.25	238.79	158.71	0	0.33	0	F
529	1.7	101.07	16.43	0	0	0	A			529	7.25	239.33	159.83	0	0.54	1.12	Q
530	1.7	101.07	16.43	0	0	0	A			530	7.25	239.83	159.92	0	0.5	0.08	A
531	1.7	101.77	16.43	0	0.7	0	Y			531	7.25	240.04	160.88	0	0.21	0.96	M
532	1.7	101.97	16.43	0	0.2	0	V			532	7.25	240.46	160.96	0	0.42	0.08	E
533	1.7	101.97	16.43	0	0	0	N			533	7.25	240.71	161.04	0	0.25	0.08	S
534	1.7	102.17	16.43	0	0.2	0	S			534	7.25	241.21	161.04	0	0.5	0	S
535	1.7	102.47	16.43	0	0.3	0	I			535	7.25	242.04	161.04	0	0.83	0	G
536	1.7	102.47	16.43	0	0	0	E			536	7.25	242.54	161.12	0	0.5	0.08	I
537	1.7	102.57	16.43	0	0.1	0	K			537	7.25	243.42	161.25	0	0.88	0.12	S
538	1.7	102.57	16.43	0	0	0	I			538	7.33	243.92	161.25	0.08	0.5	0	Q
539	1.7	102.57	16.43	0	0	0	F			539	7.42	244.42	161.25	0.08	0.5	0	Q
540	1.7	102.57	16.43	0	0	0	T
541	1.7	102.57	16.43	0	0	0	T
542	1.7	102.57	16.43	0	0	0	Y
543	1.7	102.97	16.43	0	0.4	0	R
544	1.7	103.27	16.43	0	0.3	0	D
545	1.7	103.37	16.43	0	0.1	0	A
546	1.7	103.67	16.43	0	0.3	0	G
547	1.7	103.97	16.43	0	0.3	0	L
548	1.7	104.07	16.43	0	0.1	0	A
549	1.7	104.07	16.43	0	0	0	F

## Sheet: (C)_SNAP_Pockets
Gdh					syn	nonsyn						Bb8					syn	nonsyn
				average	0.1411	0.0071										average	0.4239	0.1641
	Cumulative			Per Codon				POS	Gdh	Pocket			Cumulative			Per Codon				POS	Bb8	Pocket
codon	indel	syn	nonsyn	indel	syn	nonsyn	aa					codon	indel	syn	nonsyn	indel	syn	nonsyn	aa
133	1.70	29.02	10.08	0.00	0.00	0.00	H	133	H	ADP		125	6.67	52.82	56.68	0	0.42	0.5	H	121	H	ADP
134	1.70	29.02	10.38	0.00	0.00	0.30	K	134	K	ADP		126	6.67	53.49	56.68	0	0.67	0	R	122	R	ADP
138	1.70	29.87	10.83	0.00	0.30	0.00	K	138	K	akg		130	6.67	55.24	56.85	0	0.17	0	K	126	K	akg
140	1.70	30.27	10.83	0.00	0.40	0.00	G	140	G	akg		132	6.67	56.4	56.85	0	0.58	0	G	128	G	akg
160	1.70	33.47	10.83	0.00	0.00	0.00	T	160	T	ADP		152	6.67	67.58	61.5	0	0.83	0.08	T	148	T	ADP
162	1.70	33.47	10.83	0.00	0.00	0.00	K	162	K	akg		154	6.67	67.67	61.5	0	0	0	K	150	K	akg
164	1.70	33.67	10.83	0.00	0.00	0.00	A	164	A	ADP		156	6.67	68.83	61.5	0	0.92	0	A	152	A	ADP
167	1.70	34.37	10.83	0.00	0.00	0.00	D	167	D	ADP		159	6.67	70.25	61.58	0	0.25	0	N	155	N	ADP
168	1.70	34.37	10.83	0.00	0.00	0.00	V	168	V	ADP		160	6.67	70.75	62.42	0	0.5	0.83	V	156	V	ADP
169	1.70	34.67	10.83	0.00	0.30	0.00	P	169	P	ADP		161	6.67	71.58	62.42	0	0.83	0	P	157	P	ADP
170	1.70	34.67	10.83	0.00	0.00	0.00	F	170	F	ADP		162	6.67	71.75	62.83	0	0.17	0.42	Y	158	Y	ADP
174	1.70	35.67	10.83	0.00	0.00	0.00	K	174	K	akg		166	6.67	73.75	62.83	0	0.42	0	K	162	K	akg
216	1.70	43.67	10.83	0.00	0.50	0.00	D	216	D	NADH		208	6.67	92.42	67.67	0	0	0	D	204	D	NADH
217	1.70	43.67	10.83	0.00	0.00	0.00	M	217	M	NADH		209	6.67	92.83	67.67	0	0.42	0	V	205	V	NADH
218	1.70	44.17	10.83	0.00	0.50	0.00	G	218	G	NADH		210	6.67	93.08	67.67	0	0.25	0	N	206	N	NADH
251	1.70	50.67	10.83	0.00	0.00	0.00	I	251	I	ADP		243	6.67	105.96	74.21	0	1	0.25	V	239	V	ADP
252	1.70	50.67	10.83	0.00	0.00	0.00	N	252	N	ADP		244	6.67	106.04	74.37	0	0.08	0.17	H	240	H	ADP
254	1.70	50.87	10.83	0.00	0.20	0.00	G	254	G	ADP		246	6.67	107.03	75.47	0	0.25	0	G	242	G	ADP
255	1.70	51.67	10.83	0.00	0.80	0.00	G	255	G	ADP		247	6.67	107.19	75.47	0	0.17	0	G	243	G	ADP
257	1.70	52.17	10.83	0.00	0.20	0.00	H	257	H	GTP, ADP		249	6.67	108.19	75.72	0	0.17	0.17	N	245	N	GTP, ADP
258	1.70	52.17	10.83	0.00	0.00	0.00	G	258	G	GTP		250	6.67	108.86	75.72	0	0.67	0	G	246	G	GTP
259	1.70	52.57	10.83	0.00	0.40	0.00	R	259	R	akg, NADH		251	6.67	109.78	75.72	0	0.92	0	R	247	R	akg, NADH
260	1.70	52.57	10.83	0.00	0.00	0.00	V	260	V	GTP		252	6.67	110.19	76.81	0	0.42	1.08	H	248	H	GTP
261	1.70	52.67	10.83	0.00	0.10	0.00	S	261	S	GTP		253	6.67	110.28	77.39	0	0.08	0.58	S	249	S	GTP
265	1.70	53.07	10.83	0.00	0.10	0.00	R	265	R	GTP		257	6.67	112.44	77.64	0	0.92	0.25	R	253	R	GTP
300	1.70	56.07	11.63	0.00	0.00	0.00	F	300	F	NADH		292	6.67	126.01	86.07	0	0.5	0	F	288	F	NADH
302	1.70	56.97	11.63	0.00	0.40	0.00	N	302	N	NADH		294	6.67	126.26	86.07	0	0.17	0	N	290	N	NADH
305	1.70	57.67	11.63	0.00	0.10	0.00	L	305	L	GTP		297	6.67	127.6	86.15	0	0.5	0.08	S	293	S	GTP
306	1.70	57.67	11.63	0.00	0.00	0.00	H	306	H	GTP		298	6.67	127.76	86.15	0	0.17	0	F	294	F	GTP
309	1.70	58.67	11.63	0.00	0.00	0.00	R	309	R	GTP		301	6.67	129.43	86.24	0	0.5	0	K	297	K	GTP
310	1.70	58.77	11.63	0.00	0.10	0.00	Y	310	Y	GTP		302	6.67	129.51	86.99	0	0.08	0.75	Y	298	Y	GTP
313	1.70	59.57	11.63	0.00	0.30	0.00	R	313	R	GTP		305	6.67	130.97	87.61	0	0.42	0.25	E	301	E	GTP
323	1.70	61.87	11.73	0.00	0.00	0.00	E	323	E	NADH		315	6.67	136.68	88.65	0	0	0	E	311	E	NADH
324	1.70	61.97	11.73	0.00	0.10	0.00	H	324	H	NADH		316	6.67	136.89	89.03	0	0.21	0.38	F	312	F	NADH
337	1.70	65.47	12.13	0.00	0.20	0.00	K	337	K	GTP		329	6.67	142.92	93.58	0	0	0.33	N	325	N	GTP
340	1.70	65.77	12.13	0.00	0.10	0.00	E	340	E	GTP		332	6.67	144.04	94.87	0	0.29	1.04	F	328	F	GTP
375	1.70	70.27	13.53	0.00	0.10	0.00	A	375	A	NADH		366	6.67	161.1	108.15	0	0.17	0	A	362	A	NADH
376	1.70	70.47	13.63	0.00	0.20	0.10	V	376	V	NADH		367	6.67	161.76	108.15	0	0.67	0	T	363	T	NADH
379	1.70	70.57	13.63	0.00	0.10	0.00	V	379	V	NADH		370	6.67	163.51	108.15	0	0.67	0	V	366	V	NADH
398	1.70	73.67	16.33	0.00	0.00	0.00	N	398	N	akg, NADH		389	6.67	171.83	111.42	0	0.67	0	N	385	N	akg, NADH
423	1.70	80.67	16.43	0.00	0.50	0.00	N	423	N	NADH		414	6.67	184.18	115.74	0	0.08	0	N	410	N	NADH
430	1.70	81.87	16.43	0.00	0.20	0.00	S	430	S	akg		421	6.67	188.26	115.74	0	0.33	0	S	417	S	akg
431	1.70	81.87	16.43	0.00	0.00	0.00	F	431	F	ADP		422	6.67	188.68	115.74	0	0.42	0	Y	418	Y	ADP
436	1.70	82.47	16.43	0.00	0.00	0.00	K	436	K	ADP		427	6.67	191.43	115.82	0	0.5	0	K	423	K	ADP
441	1.70	83.47	16.43	0.00	0.00	0.00	V	441	V	ADP		432	6.67	193.68	115.82	0	0.33	0	V	428	V	ADP
442	1.70	83.87	16.43	0.00	0.40	0.00	S	442	S	ADP		433	6.67	194.43	115.99	0	0.75	0.17	S	429	S	ADP
445	1.70	84.07	16.43	0.00	0.20	0.00	R	445	R	ADP		436	6.67	195.64	116.11	0	0.54	0.12	K	432	K	ADP
494	1.70	93.77	16.43	0.00	0.00	0.00	E	494	E	ADP		483	7.17	215.89	145.03	0	0.17	0	E	479	E	ADP
495	1.70	93.77	16.43	0.00	0.00	0.00	K	495	K	GTP		484	7.25	216.47	145.11	0.08	0.58	0.08	A	480	A	GTP
499	1.70	94.97	16.43	0.00	0.00	0.00	H	499	H	GTP		488	7.25	218.85	145.4	0	0.83	0	D	484	D	GTP
501	1.70	95.67	16.43	0.00	0.30	0.00	G	501	G	!!!		490	7.25	220.01	146.24	0	0.42	0	A	486	A	!!!
504	1.70	96.17	16.43	0.00	0.20	0.00	Y	504	Y	ADP		493	7.25	222.01	146.32	0	0.83	0	T	489	T	ADP
508	1.70	96.77	16.43	0.00	0.50	0.00	R	508	R	ADP		497	7.25	223.39	146.94	0	0.62	0.46	S	493	S	ADP
537	1.70	102.57	16.43	0.00	0.10	0.00	K	537	K	ADP		526	7.25	237.71	158.71	0	0.17	0	K	522	K	ADP
540	1.70	102.57	16.43	0.00	0.00	0.00	T	540	T	ADP		529	7.25	239.33	159.83	0	0.54	1.12	Q	525	Q	ADP
541	1.70	102.57	16.43	0.00	0.00	0.00	T	541	T	ADP		530	7.25	239.83	159.92	0	0.5	0.08	A	526	A	ADP

## Sheet: (D) InterEvDock3 scores&templs
(Docking of two homotrimers)
Consensus models	IESh rank	IESh Score (higher is better)	SPPh rank	SPPh score (higher is better)	FRODOCK2 rank	FRODOCK2 score (higher is better)
BB8_Consensus_1	2	10.637	5	2791.8	2	5992.94
BB8_Consensus_2	4	9.448	2	3047.47	1	6069.9
BB8_Consensus_3	1	10.783	9	2352.45	3	5673.95
Gdh_Consensus_1	5	7.758	3	4034.83	1	7686.9
Gdh_Consensus_2	10	6.905	4	4030.22	3	7300.97
Gdh_Consensus_3	3	9.541	1	4319.94	2	7431.2
Top3 template bb8 trimers
Group of Seqs	Templ Index	PDB	Avg Id	Avg Cov	Num Seqs	whichseq:chain(id%)	Method	Resol
g001	t001	1HWY	45	93	3	s1:A(45%) s2:B(45%) s3:C(45%)	X-RAY_DIFFRACTION	3.2
g001	t002	3ETD	45	93	3	s1:A(45%) s2:B(45%) s3:C(45%)	X-RAY_DIFFRACTION	2.5
g001	t003	3ETG	45	93	3	s1:A(45%) s2:B(45%) s3:C(45%)	X-RAY_DIFFRACTION	2.5
Group of Seqs	Templ Index	PDB	Avg Id	Avg Cov	Num Seqs	whichseq:chain(id%)	Method	Resol
g001	t001	1HWY	45	93	3	s1:A(45%) s2:B(45%) s3:C(45%)	X-RAY_DIFFRACTION	3.2
g001	t002	3ETD	45	93	3	s1:A(45%) s2:B(45%) s3:C(45%)	X-RAY_DIFFRACTION	2.5
g001	t003	3ETG	45	93	3	s1:A(45%) s2:B(45%) s3:C(45%)	X-RAY_DIFFRACTION	2.5
Top3 template gdh trimers
Group of Seqs	Templ Index	PDB	Avg Id	Avg Cov	Num Seqs	whichseq:chain(id%)	Method	Resol
g001	t001	6DHN	71	91	3	s1:A(71%) s2:B(71%) s3:C(71%)	X-RAY_DIFFRACTION	3.3
g001	t002	1HWY	70	90	3	s1:A(70%) s2:B(70%) s3:C(70%)	X-RAY_DIFFRACTION	3.2
g001	t003	1L1F	71	90	3	s1:A(71%) s2:B(71%) s3:C(71%)	X-RAY_DIFFRACTION	2.7
Group of Seqs	Templ Index	PDB	Avg Id	Avg Cov	Num Seqs	whichseq:chain(id%)	Method	Resol
g001	t001	6DHN	71	91	3	s1:A(71%) s2:B(71%) s3:C(71%)	X-RAY_DIFFRACTION	3.3
g001	t002	1HWY	70	90	3	s1:A(70%) s2:B(70%) s3:C(70%)	X-RAY_DIFFRACTION	3.2
g001	t003	1L1F	71	90	3	s1:A(71%) s2:B(71%) s3:C(71%)	X-RAY_DIFFRACTION	2.7
Top3 Glud1 (human) monomer
Group of Seqs	Templ Index	PDB	Avg Id	Avg Cov	Num Seqs	whichseq:chain(id%)	Method	Resol
g001	t001	1HWY	95	89	1	s1:A(95%)	X-RAY_DIFFRACTION	3.2
g001	t002	3ETD	98	89	1	s1:A(98%)	X-RAY_DIFFRACTION	2.5
g001	t003	3ETG	98	89	1	s1:A(98%)	X-RAY_DIFFRACTION	2.5
Top3 Glud2 (human) monomer
Group of Seqs	Templ Index	PDB	Avg Id	Avg Cov	Num Seqs	whichseq:chain(id%)	Method	Resol
g001	t001	1HWY	93	89	1	s1:A(93%)	X-RAY_DIFFRACTION	3.2
g001	t002	3ETD	96	89	1	s1:A(96%)	X-RAY_DIFFRACTION	2.5
g001	t003	3ETG	96	89	1	s1:A(96%)	X-RAY_DIFFRACTION	2.5

## Sheet: (E) Gdh wt SwissDock scores
Cluster	ClusterRank	deltaG	deltaGelec	deltaGvdw	deltaGligsolvnonpol	deltaGligsolvpol	deltaGprotsolvnonpol	deltaGprotsolvpol	deltaGcompsolvnonpol	deltaGcompsolvpol	extraFull	surfFull	solvFull	IntraFull	InterFull	FullFitness	SimpleFitness	Energy
0	0	-11.6571	0	-145.988	13.5383	-116.847	354.931	-3204.05	351.82	-3194.78	0	351.82	-3194.78	-29.2606	-145.988	-3018.21	-9.34018	-9.34018
0	1	-11.6571	0	-145.988	13.5383	-116.847	354.931	-3204.05	351.82	-3194.78	0	351.82	-3194.78	-29.2606	-145.988	-3018.21	-9.34018	-9.34018
0	2	-11.6571	0	-145.988	13.5383	-116.847	354.931	-3204.05	351.82	-3194.78	0	351.82	-3194.78	-29.2606	-145.988	-3018.21	-9.34018	-9.34018
0	3	-11.6534	0	-145.991	13.5267	-116.817	354.931	-3204.05	351.812	-3194.69	0	351.812	-3194.69	-29.283	-145.991	-3018.15	-9.33801	-9.33801
0	4	-11.6534	0	-145.991	13.5267	-116.817	354.931	-3204.05	351.812	-3194.69	0	351.812	-3194.69	-29.283	-145.991	-3018.15	-9.33801	-9.33801
0	5	-11.6311	0	-145.406	13.5313	-116.547	354.931	-3204.05	351.804	-3194.94	0	351.804	-3194.94	-29.6023	-145.406	-3018.14	-9.38722	-9.38722
0	6	-11.6311	0	-145.406	13.5313	-116.547	354.931	-3204.05	351.804	-3194.94	0	351.804	-3194.94	-29.6023	-145.406	-3018.14	-9.38722	-9.38722
0	7	-11.6311	0	-145.406	13.5313	-116.547	354.931	-3204.05	351.804	-3194.94	0	351.804	-3194.94	-29.6023	-145.406	-3018.14	-9.38722	-9.38722
1	0	-10.5334	0	-107.242	13.1321	-89.0919	354.931	-3204.05	352.019	-3209.49	0	352.019	-3209.49	-51.4595	-107.242	-3016.17	-5.57727	-5.57727
1	1	-9.80145	0	-94.2052	13.1104	-83.7906	354.931	-3204.05	352.029	-3212.43	0	352.029	-3212.43	-55.3983	-94.2052	-3010	-3.32784	-3.32784
2	0	-11.0683	0	-120.998	13.5217	-90.3246	354.931	-3204.05	353.483	-3199.86	0	353.483	-3199.86	-44.53	-120.998	-3011.91	-1.99751	-1.99751
2	1	-11.0683	0	-120.998	13.5217	-90.3246	354.931	-3204.05	353.483	-3199.86	0	353.483	-3199.86	-44.53	-120.998	-3011.91	-1.99751	-1.99751
2	2	-10.8111	0	-119.993	13.5227	-89.1126	354.931	-3204.05	353.465	-3195.97	0	353.465	-3195.97	-45.1143	-119.993	-3007.61	-0.894348	-0.894348
2	3	-10.8111	0	-119.993	13.5227	-89.1126	354.931	-3204.05	353.465	-3195.97	0	353.465	-3195.97	-45.1143	-119.993	-3007.61	-0.894348	-0.894348
2	4	-10.8111	0	-119.993	13.5227	-89.1126	354.931	-3204.05	353.465	-3195.97	0	353.465	-3195.97	-45.1143	-119.993	-3007.61	-0.894348	-0.894348
2	5	-10.8111	0	-119.993	13.5227	-89.1126	354.931	-3204.05	353.465	-3195.97	0	353.465	-3195.97	-45.1143	-119.993	-3007.61	-0.894348	-0.894348
2	6	-10.425	0	-114.577	13.4053	-82.9674	354.931	-3204.05	353.478	-3192.09	0	353.478	-3192.09	-51.1746	-114.577	-3004.36	2.66621	2.66621
2	7	-10.425	0	-114.577	13.4053	-82.9674	354.931	-3204.05	353.478	-3192.09	0	353.478	-3192.09	-51.1746	-114.577	-3004.36	2.66621	2.66621
3	0	-11.4154	0	-139.06	12.8737	-96.6191	354.931	-3204.05	352.649	-3183.62	0	352.649	-3183.62	-38.9275	-139.06	-3008.96	0.53693	0.53693
3	1	-11.3531	0	-138.66	12.8819	-97.6267	354.931	-3204.05	352.659	-3184.23	0	352.659	-3184.23	-38.4548	-138.66	-3008.69	0.642942	0.642942
3	2	-10.4671	0	-116.771	13.3801	-92.7601	354.931	-3204.05	352.819	-3198.2	0	352.819	-3198.2	-45.8641	-116.771	-3008.02	4.35357	4.35357
3	3	-10.778	0	-125.33	13.3248	-102.863	354.931	-3204.05	352.821	-3200.24	0	352.821	-3200.24	-35.2625	-125.33	-3008.01	1.98901	1.98901
3	4	-10.7198	0	-125.135	13.3914	-101.024	354.931	-3204.05	352.906	-3197.78	0	352.906	-3197.78	-37.2802	-125.135	-3007.29	0.610699	0.610699
3	5	-11.0476	0	-135.693	12.8763	-101.859	354.931	-3204.05	352.623	-3188.01	0	352.623	-3188.01	-35.8306	-135.693	-3006.91	1.61987	1.61987
3	6	-10.2805	0	-115.325	13.3566	-94.5734	354.931	-3204.05	353.139	-3199.73	0	353.139	-3199.73	-42.3768	-115.325	-3004.29	5.99237	5.99237
3	7	-10.0924	0	-110.04	13.3221	-90.5584	354.931	-3204.05	352.794	-3200.33	0	352.794	-3200.33	-46.422	-110.04	-3004	6.07717	6.07717
4	0	-10.9573	0	-138.559	13.4466	-92.5413	354.931	-3204.05	353.713	-3173.59	0	353.713	-3173.59	-46.7309	-138.559	-3005.17	-3.3054	-3.3054
4	1	-10.9573	0	-138.559	13.4466	-92.5413	354.931	-3204.05	353.713	-3173.59	0	353.713	-3173.59	-46.7309	-138.559	-3005.17	-3.3054	-3.3054
4	2	-10.9573	0	-138.559	13.4466	-92.5413	354.931	-3204.05	353.713	-3173.59	0	353.713	-3173.59	-46.7309	-138.559	-3005.17	-3.3054	-3.3054
4	3	-10.9573	0	-138.559	13.4466	-92.5413	354.931	-3204.05	353.713	-3173.59	0	353.713	-3173.59	-46.7309	-138.559	-3005.17	-3.3054	-3.3054
4	4	-10.9531	0	-138.511	13.4464	-92.489	354.931	-3204.05	353.717	-3173.55	0	353.717	-3173.55	-46.7989	-138.511	-3005.14	-3.304	-3.304
4	5	-10.9531	0	-138.511	13.4464	-92.489	354.931	-3204.05	353.717	-3173.55	0	353.717	-3173.55	-46.7989	-138.511	-3005.14	-3.304	-3.304
4	6	-10.8619	0	-137.394	13.4722	-92.4904	354.931	-3204.05	353.764	-3173.82	0	353.764	-3173.82	-47.1496	-137.394	-3004.6	-3.00249	-3.00249
4	7	-10.8619	0	-137.394	13.4722	-92.4904	354.931	-3204.05	353.764	-3173.82	0	353.764	-3173.82	-47.1496	-137.394	-3004.6	-3.00249	-3.00249
5	0	-10.0537	0	-114.757	13.7173	-107.055	354.931	-3204.05	351.925	-3206.95	0	351.925	-3206.95	-33.4508	-114.757	-3003.23	-2.92179	-2.92179
5	1	-10.0537	0	-114.757	13.7173	-107.055	354.931	-3204.05	351.925	-3206.95	0	351.925	-3206.95	-33.4508	-114.757	-3003.23	-2.92179	-2.92179
5	2	-10.0537	0	-114.757	13.7173	-107.055	354.931	-3204.05	351.925	-3206.95	0	351.925	-3206.95	-33.4508	-114.757	-3003.23	-2.92179	-2.92179
5	3	-9.9479	0	-112.978	13.7258	-107.755	354.931	-3204.05	351.985	-3208.75	0	351.985	-3208.75	-33.4182	-112.978	-3003.16	-2.93469	-2.93469
5	4	-9.9479	0	-112.978	13.7258	-107.755	354.931	-3204.05	351.985	-3208.75	0	351.985	-3208.75	-33.4182	-112.978	-3003.16	-2.93469	-2.93469
5	5	-9.9479	0	-112.978	13.7258	-107.755	354.931	-3204.05	351.985	-3208.75	0	351.985	-3208.75	-33.4182	-112.978	-3003.16	-2.93469	-2.93469
5	6	-9.19445	0	-101.293	13.7563	-104.693	354.931	-3204.05	352.081	-3211.54	0	352.081	-3211.54	-37.4843	-101.293	-2998.24	-0.395541	-0.395541
5	7	-9.19445	0	-101.293	13.7563	-104.693	354.931	-3204.05	352.081	-3211.54	0	352.081	-3211.54	-37.4843	-101.293	-2998.24	-0.395541	-0.395541
6	0	-11.4564	0	-140.687	14.2959	-117.23	354.931	-3204.05	353.977	-3202.24	0	353.977	-3202.24	-13.6796	-140.687	-3002.63	10.1383	10.1383
6	1	-11.4564	0	-140.687	14.2959	-117.23	354.931	-3204.05	353.977	-3202.24	0	353.977	-3202.24	-13.6796	-140.687	-3002.63	10.1383	10.1383
6	2	-11.4074	0	-140.885	14.2869	-117.731	354.931	-3204.05	354.081	-3201.81	0	354.081	-3201.81	-13.6902	-140.885	-3002.3	10.7574	10.7574
6	3	-11.4074	0	-140.885	14.2869	-117.731	354.931	-3204.05	354.081	-3201.81	0	354.081	-3201.81	-13.6902	-140.885	-3002.3	10.7574	10.7574
6	4	-11.204	0	-136.233	14.2435	-117.652	354.931	-3204.05	353.89	-3205.37	0	353.89	-3205.37	-13.8495	-136.233	-3001.56	11.0137	11.0137
6	5	-11.204	0	-136.233	14.2435	-117.652	354.931	-3204.05	353.89	-3205.37	0	353.89	-3205.37	-13.8495	-136.233	-3001.56	11.0137	11.0137
6	6	-11.204	0	-136.233	14.2435	-117.652	354.931	-3204.05	353.89	-3205.37	0	353.89	-3205.37	-13.8495	-136.233	-3001.56	11.0137	11.0137
6	7	-11.204	0	-136.233	14.2435	-117.652	354.931	-3204.05	353.89	-3205.37	0	353.89	-3205.37	-13.8495	-136.233	-3001.56	11.0137	11.0137
7	0	-10.1061	0	-114.184	13.4666	-93.8638	354.931	-3204.05	352.671	-3197.04	0	352.671	-3197.04	-42.5986	-114.184	-3001.15	5.99312	5.99312
7	1	-10.0337	0	-112.498	13.456	-93.2823	354.931	-3204.05	352.678	-3197.91	0	352.678	-3197.91	-43.3999	-112.498	-3001.13	5.94333	5.94333
7	2	-10.0337	0	-112.498	13.456	-93.2823	354.931	-3204.05	352.678	-3197.91	0	352.678	-3197.91	-43.3999	-112.498	-3001.13	5.94333	5.94333
7	3	-10.0337	0	-112.498	13.456	-93.2823	354.931	-3204.05	352.678	-3197.91	0	352.678	-3197.91	-43.3999	-112.498	-3001.13	5.94333	5.94333
7	4	-10.0337	0	-112.498	13.456	-93.2823	354.931	-3204.05	352.678	-3197.91	0	352.678	-3197.91	-43.3999	-112.498	-3001.13	5.94333	5.94333
7	5	-10.0337	0	-112.498	13.456	-93.2823	354.931	-3204.05	352.678	-3197.91	0	352.678	-3197.91	-43.3999	-112.498	-3001.13	5.94333	5.94333
7	6	-10.5109	0	-120.12	13.6069	-103.322	354.931	-3204.05	352.095	-3202.83	0	352.095	-3202.83	-26.358	-120.12	-2997.21	7.74878	7.74878
7	7	-10.5109	0	-120.12	13.6069	-103.322	354.931	-3204.05	352.095	-3202.83	0	352.095	-3202.83	-26.358	-120.12	-2997.21	7.74878	7.74878
7	8	-10.5239	0	-119.205	13.519	-102.215	354.931	-3204.05	352.104	-3203.5	0	352.104	-3203.5	-26.4596	-119.205	-2997.06	7.05264	7.05264
7	9	-9.71873	0	-110.225	13.4218	-97.974	354.931	-3204.05	352.645	-3200.97	0	352.645	-3200.97	-38.376	-110.225	-2996.93	8.59049	8.59049
7	10	-9.71873	0	-110.225	13.4218	-97.974	354.931	-3204.05	352.645	-3200.97	0	352.645	-3200.97	-38.376	-110.225	-2996.93	8.59049	8.59049
7	11	-10.5382	0	-119.953	13.4512	-103.09	354.931	-3204.05	352.074	-3203.51	0	352.074	-3203.51	-25.3493	-119.953	-2996.74	7.54821	7.54821
7	12	-10.5382	0	-119.953	13.4512	-103.09	354.931	-3204.05	352.074	-3203.51	0	352.074	-3203.51	-25.3493	-119.953	-2996.74	7.54821	7.54821
7	13	-10.5382	0	-119.953	13.4512	-103.09	354.931	-3204.05	352.074	-3203.51	0	352.074	-3203.51	-25.3493	-119.953	-2996.74	7.54821	7.54821
7	14	-10.5382	0	-119.953	13.4512	-103.09	354.931	-3204.05	352.074	-3203.51	0	352.074	-3203.51	-25.3493	-119.953	-2996.74	7.54821	7.54821
7	15	-10.5382	0	-119.953	13.4512	-103.09	354.931	-3204.05	352.074	-3203.51	0	352.074	-3203.51	-25.3493	-119.953	-2996.74	7.54821	7.54821
8	0	-9.54771	0	-102.545	13.072	-79.2869	354.931	-3204.05	351.202	-3189.67	0	351.202	-3189.67	-60.003	-102.545	-3001.02	-1.1086	-1.1086
8	1	-9.5403	0	-102.518	13.0922	-79.803	354.931	-3204.05	351.218	-3190.1	0	351.218	-3190.1	-59.571	-102.518	-3000.97	-1.12953	-1.12953
8	2	-9.5403	0	-102.518	13.0922	-79.803	354.931	-3204.05	351.218	-3190.1	0	351.218	-3190.1	-59.571	-102.518	-3000.97	-1.12953	-1.12953
8	3	-9.5403	0	-102.518	13.0922	-79.803	354.931	-3204.05	351.218	-3190.1	0	351.218	-3190.1	-59.571	-102.518	-3000.97	-1.12953	-1.12953
8	4	-9.15319	0	-94.2387	13.1086	-75.585	354.931	-3204.05	351.238	-3192.36	0	351.238	-3192.36	-65.5487	-94.2387	-3000.91	-0.49857	-0.49857
8	5	-9.15319	0	-94.2387	13.1086	-75.585	354.931	-3204.05	351.238	-3192.36	0	351.238	-3192.36	-65.5487	-94.2387	-3000.91	-0.49857	-0.49857
8	6	-9.15319	0	-94.2387	13.1086	-75.585	354.931	-3204.05	351.238	-3192.36	0	351.238	-3192.36	-65.5487	-94.2387	-3000.91	-0.49857	-0.49857
8	7	-9.15319	0	-94.2387	13.1086	-75.585	354.931	-3204.05	351.238	-3192.36	0	351.238	-3192.36	-65.5487	-94.2387	-3000.91	-0.49857	-0.49857
9	0	-10.5962	0	-121.514	13.0801	-88.926	354.931	-3204.05	352	-3188.34	0	352	-3188.34	-42.9497	-121.514	-3000.8	11.1786	11.1786
9	1	-10.5962	0	-121.514	13.0801	-88.926	354.931	-3204.05	352	-3188.34	0	352	-3188.34	-42.9497	-121.514	-3000.8	11.1786	11.1786
9	2	-9.85593	0	-113.92	13.2815	-95.3938	354.931	-3204.05	352.013	-3194.16	0	352.013	-3194.16	-41.5545	-113.92	-2997.62	12.734	12.734
9	3	-9.85593	0	-113.92	13.2815	-95.3938	354.931	-3204.05	352.013	-3194.16	0	352.013	-3194.16	-41.5545	-113.92	-2997.62	12.734	12.734
9	4	-9.85593	0	-113.92	13.2815	-95.3938	354.931	-3204.05	352.013	-3194.16	0	352.013	-3194.16	-41.5545	-113.92	-2997.62	12.734	12.734
9	5	-9.87573	0	-113.235	13.2939	-95.477	354.931	-3204.05	351.996	-3195.58	0	351.996	-3195.58	-40.5175	-113.235	-2997.34	12.4013	12.4013
9	6	-9.87573	0	-113.235	13.2939	-95.477	354.931	-3204.05	351.996	-3195.58	0	351.996	-3195.58	-40.5175	-113.235	-2997.34	12.4013	12.4013
9	7	-9.87573	0	-113.235	13.2939	-95.477	354.931	-3204.05	351.996	-3195.58	0	351.996	-3195.58	-40.5175	-113.235	-2997.34	12.4013	12.4013
10	0	-9.25469	0	-102.98	13.5935	-93.3586	354.931	-3204.05	353.741	-3201.4	0	353.741	-3201.4	-49.701	-102.98	-3000.34	13.8309	13.8309
10	1	-9.04927	0	-101.342	13.6407	-93.0592	354.931	-3204.05	353.998	-3200.6	0	353.998	-3200.6	-48.4637	-101.342	-2996.41	13.7979	13.7979
10	2	-9.01896	0	-100.784	13.6407	-92.841	354.931	-3204.05	353.992	-3200.74	0	353.992	-3200.74	-48.5678	-100.784	-2996.1	13.8139	13.8139
10	3	-8.81304	0	-102.774	13.806	-102.938	354.931	-3204.05	354.121	-3204.34	0	354.121	-3204.34	-37.477	-102.774	-2990.47	14.0016	14.0016
10	4	-8.70776	0	-99.9419	13.836	-103.62	354.931	-3204.05	354.216	-3207.78	0	354.216	-3207.78	-36.4213	-99.9419	-2989.93	15.3474	15.3474
10	5	-8.3847	0	-95.5904	14.0328	-110.549	354.931	-3204.05	354.318	-3216.01	0	354.318	-3216.01	-27.1635	-95.5904	-2984.45	17.4433	17.4433
10	6	-8.54554	0	-102.59	14.1842	-132.713	354.931	-3204.05	354.222	-3229.6	0	354.222	-3229.6	-1.37662	-102.59	-2979.34	23.263	23.263
10	7	-8.80071	0	-106.872	14.021	-128.231	354.931	-3204.05	353.995	-3222.57	0	353.995	-3222.57	-3.18847	-106.872	-2978.64	23.0269	23.0269
11	0	-10.018	0	-114.718	14.1264	-115.875	354.931	-3204.05	353.217	-3216.61	0	353.217	-3216.61	-21.4156	-114.718	-2999.53	12.2691	12.2691
11	1	-9.91859	0	-111.971	14.1101	-115.252	354.931	-3204.05	353.259	-3218.7	0	353.259	-3218.7	-21.8633	-111.971	-2999.28	11.9531	11.9531
11	2	-9.91859	0	-111.971	14.1101	-115.252	354.931	-3204.05	353.259	-3218.7	0	353.259	-3218.7	-21.8633	-111.971	-2999.28	11.9531	11.9531
11	3	-9.91859	0	-111.971	14.1101	-115.252	354.931	-3204.05	353.259	-3218.7	0	353.259	-3218.7	-21.8633	-111.971	-2999.28	11.9531	11.9531
11	4	-9.88492	0	-111.249	14.1092	-114.832	354.931	-3204.05	353.235	-3218.81	0	353.235	-3218.81	-22.2569	-111.249	-2999.08	11.9809	11.9809
11	5	-9.88492	0	-111.249	14.1092	-114.832	354.931	-3204.05	353.235	-3218.81	0	353.235	-3218.81	-22.2569	-111.249	-2999.08	11.9809	11.9809
11	6	-9.88492	0	-111.249	14.1092	-114.832	354.931	-3204.05	353.235	-3218.81	0	353.235	-3218.81	-22.2569	-111.249	-2999.08	11.9809	11.9809
11	7	-9.88492	0	-111.249	14.1092	-114.832	354.931	-3204.05	353.235	-3218.81	0	353.235	-3218.81	-22.2569	-111.249	-2999.08	11.9809	11.9809
12	0	-9.18626	0	-92.9237	13.3289	-102.048	354.931	-3204.05	353.091	-3223.92	0	353.091	-3223.92	-35.4647	-92.9237	-2999.22	11.7797	11.7797
12	1	-9.03424	0	-94.558	13.4005	-115.765	354.931	-3204.05	353.113	-3232.55	0	353.113	-3232.55	-18.6582	-94.558	-2992.65	13.0884	13.0884
12	2	-9.03424	0	-94.558	13.4005	-115.765	354.931	-3204.05	353.113	-3232.55	0	353.113	-3232.55	-18.6582	-94.558	-2992.65	13.0884	13.0884
12	3	-9.03424	0	-94.558	13.4005	-115.765	354.931	-3204.05	353.113	-3232.55	0	353.113	-3232.55	-18.6582	-94.558	-2992.65	13.0884	13.0884
12	4	-9.01128	0	-94.1993	13.3838	-115.84	354.931	-3204.05	353.087	-3232.79	0	353.087	-3232.79	-18.4124	-94.1993	-2992.32	13.0395	13.0395
12	5	-9.01128	0	-94.1993	13.3838	-115.84	354.931	-3204.05	353.087	-3232.79	0	353.087	-3232.79	-18.4124	-94.1993	-2992.32	13.0395	13.0395
12	6	-9.01128	0	-94.1993	13.3838	-115.84	354.931	-3204.05	353.087	-3232.79	0	353.087	-3232.79	-18.4124	-94.1993	-2992.32	13.0395	13.0395
12	7	-9.01128	0	-94.1993	13.3838	-115.84	354.931	-3204.05	353.087	-3232.79	0	353.087	-3232.79	-18.4124	-94.1993	-2992.32	13.0395	13.0395
13	0	-9.47109	0	-96.0881	13.5497	-76.6678	354.931	-3204.05	353.239	-3198.19	0	353.239	-3198.19	-58.0368	-96.0881	-2999.08	8.92156	8.92156
13	1	-9.47109	0	-96.0881	13.5497	-76.6678	354.931	-3204.05	353.239	-3198.19	0	353.239	-3198.19	-58.0368	-96.0881	-2999.08	8.92156	8.92156
13	2	-9.47109	0	-96.0881	13.5497	-76.6678	354.931	-3204.05	353.239	-3198.19	0	353.239	-3198.19	-58.0368	-96.0881	-2999.08	8.92156	8.92156
13	3	-9.47109	0	-96.0881	13.5497	-76.6678	354.931	-3204.05	353.239	-3198.19	0	353.239	-3198.19	-58.0368	-96.0881	-2999.08	8.92156	8.92156
13	4	-9.44437	0	-96.1875	13.559	-78.2438	354.931	-3204.05	353.277	-3199.22	0	353.277	-3199.22	-56.9123	-96.1875	-2999.04	9.09332	9.09332
13	5	-9.44437	0	-96.1875	13.559	-78.2438	354.931	-3204.05	353.277	-3199.22	0	353.277	-3199.22	-56.9123	-96.1875	-2999.04	9.09332	9.09332
13	6	-9.39696	0	-96.4405	13.586	-80.2984	354.931	-3204.05	353.266	-3200.05	0	353.266	-3200.05	-54.8886	-96.4405	-2998.11	9.70471	9.70471
13	7	-9.39696	0	-96.4405	13.586	-80.2984	354.931	-3204.05	353.266	-3200.05	0	353.266	-3200.05	-54.8886	-96.4405	-2998.11	9.70471	9.70471
14	0	-10.5561	0	-122.026	12.7158	-100.375	354.931	-3204.05	352.598	-3199.83	0	352.598	-3199.83	-29.7511	-122.026	-2999.01	9.84958	9.84958
14	1	-10.5561	0	-122.026	12.7158	-100.375	354.931	-3204.05	352.598	-3199.83	0	352.598	-3199.83	-29.7511	-122.026	-2999.01	9.84958	9.84958
14	2	-10.5135	0	-121.348	12.6773	-100.271	354.931	-3204.05	352.515	-3200.01	0	352.515	-3200.01	-29.8238	-121.348	-2998.67	9.70224	9.70224
14	3	-10.6648	0	-129.709	13.1511	-103.786	354.931	-3204.05	352.411	-3192.18	0	352.411	-3192.18	-29.1241	-129.709	-2998.6	12.3362	12.3362
14	4	-10.5064	0	-121.702	12.7455	-100.646	354.931	-3204.05	352.524	-3199.63	0	352.524	-3199.63	-29.7518	-121.702	-2998.56	9.64043	9.64043
14	5	-10.5064	0	-121.702	12.7455	-100.646	354.931	-3204.05	352.524	-3199.63	0	352.524	-3199.63	-29.7518	-121.702	-2998.56	9.64043	9.64043
14	6	-10.5372	0	-127.927	13.1741	-103.946	354.931	-3204.05	352.357	-3192.89	0	352.357	-3192.89	-29.221	-127.927	-2997.68	12.186	12.186
14	7	-10.2834	0	-124.118	13.1329	-105.308	354.931	-3204.05	352.294	-3195.96	0	352.294	-3195.96	-28.3318	-124.118	-2996.12	12.1457	12.1457
15	0	-9.99418	0	-113.196	14.0252	-106.493	354.931	-3204.05	353.496	-3209.78	0	353.496	-3209.78	-29.2374	-113.196	-2998.72	14.2511	14.2511
15	1	-9.99418	0	-113.196	14.0252	-106.493	354.931	-3204.05	353.496	-3209.78	0	353.496	-3209.78	-29.2374	-113.196	-2998.72	14.2511	14.2511
15	2	-9.99418	0	-113.196	14.0252	-106.493	354.931	-3204.05	353.496	-3209.78	0	353.496	-3209.78	-29.2374	-113.196	-2998.72	14.2511	14.2511
15	3	-9.99418	0	-113.196	14.0252	-106.493	354.931	-3204.05	353.496	-3209.78	0	353.496	-3209.78	-29.2374	-113.196	-2998.72	14.2511	14.2511
15	4	-10.0233	0	-113.538	14.0129	-105.647	354.931	-3204.05	353.476	-3208.87	0	353.476	-3208.87	-29.7469	-113.538	-2998.68	14.14	14.14
15	5	-9.12991	0	-100.005	13.9582	-98.5933	354.931	-3204.05	353.566	-3208.36	0	353.566	-3208.36	-41.3079	-100.005	-2996.11	15.1233	15.1233
15	6	-9.12991	0	-100.005	13.9582	-98.5933	354.931	-3204.05	353.566	-3208.36	0	353.566	-3208.36	-41.3079	-100.005	-2996.11	15.1233	15.1233
15	7	-9.12991	0	-100.005	13.9582	-98.5933	354.931	-3204.05	353.566	-3208.36	0	353.566	-3208.36	-41.3079	-100.005	-2996.11	15.1233	15.1233
16	0	-10.2083	0	-108.021	14.2623	-104.073	354.931	-3204.05	353.598	-3218.65	0	353.598	-3218.65	-25.4597	-108.021	-2998.53	14.4409	14.4409
16	1	-10.2083	0	-108.021	14.2623	-104.073	354.931	-3204.05	353.598	-3218.65	0	353.598	-3218.65	-25.4597	-108.021	-2998.53	14.4409	14.4409
16	2	-10.2083	0	-108.021	14.2623	-104.073	354.931	-3204.05	353.598	-3218.65	0	353.598	-3218.65	-25.4597	-108.021	-2998.53	14.4409	14.4409
16	3	-10.2083	0	-108.021	14.2623	-104.073	354.931	-3204.05	353.598	-3218.65	0	353.598	-3218.65	-25.4597	-108.021	-2998.53	14.4409	14.4409
16	4	-10.2083	0	-108.021	14.2623	-104.073	354.931	-3204.05	353.598	-3218.65	0	353.598	-3218.65	-25.4597	-108.021	-2998.53	14.4409	14.4409
16	5	-10.1029	0	-105.869	14.1921	-103.563	354.931	-3204.05	353.552	-3219.78	0	353.552	-3219.78	-25.8477	-105.869	-2997.94	14.6639	14.6639
16	6	-10.1209	0	-106.577	14.2607	-104.071	354.931	-3204.05	353.563	-3219.4	0	353.563	-3219.4	-25.1633	-106.577	-2997.58	14.744	14.744
16	7	-10.1209	0	-106.577	14.2607	-104.071	354.931	-3204.05	353.563	-3219.4	0	353.563	-3219.4	-25.1633	-106.577	-2997.58	14.744	14.744
17	0	-9.95136	0	-112.703	13.4441	-77.6708	354.931	-3204.05	352.533	-3180.43	0	352.533	-3180.43	-57.8974	-112.703	-2998.5	5.79717	5.79717
17	1	-9.95136	0	-112.703	13.4441	-77.6708	354.931	-3204.05	352.533	-3180.43	0	352.533	-3180.43	-57.8974	-112.703	-2998.5	5.79717	5.79717
17	2	-9.91848	0	-112.585	13.4206	-78.0566	354.931	-3204.05	352.496	-3180.44	0	352.496	-3180.44	-57.787	-112.585	-2998.32	5.95725	5.95725
17	3	-9.73596	0	-109.501	13.4222	-77.7162	354.931	-3204.05	352.456	-3181.82	0	352.456	-3181.82	-57.6154	-109.501	-2996.48	6.62385	6.62385
17	4	-9.29867	0	-111.994	13.4627	-111.143	354.931	-3204.05	351.799	-3203.17	0	351.799	-3203.17	-22.2387	-111.994	-2985.6	9.25816	9.25816
17	5	-9.28972	0	-111.784	13.4747	-111.328	354.931	-3204.05	351.809	-3203.53	0	351.809	-3203.53	-22.0053	-111.784	-2985.51	9.25355	9.25355
17	6	-9.24522	0	-111.181	13.4886	-111.499	354.931	-3204.05	351.806	-3203.88	0	351.806	-3203.88	-22.026	-111.181	-2985.28	9.26777	9.26777
17	7	-9.24522	0	-111.181	13.4886	-111.499	354.931	-3204.05	351.806	-3203.88	0	351.806	-3203.88	-22.026	-111.181	-2985.28	9.26777	9.26777
18	0	-10.27	0	-120.185	13.9508	-108.84	354.931	-3204.05	354.068	-3206.83	0	354.068	-3206.83	-25.0765	-120.185	-2998.02	18.1982	18.1982
18	1	-10.27	0	-120.185	13.9508	-108.84	354.931	-3204.05	354.068	-3206.83	0	354.068	-3206.83	-25.0765	-120.185	-2998.02	18.1982	18.1982
18	2	-10.2602	0	-120.192	13.9334	-109.171	354.931	-3204.05	354.057	-3207	0	354.057	-3207	-24.5707	-120.192	-2997.71	18.106	18.106
18	3	-10.2602	0	-120.192	13.9334	-109.171	354.931	-3204.05	354.057	-3207	0	354.057	-3207	-24.5707	-120.192	-2997.71	18.106	18.106
18	4	-10.2602	0	-120.192	13.9334	-109.171	354.931	-3204.05	354.057	-3207	0	354.057	-3207	-24.5707	-120.192	-2997.71	18.106	18.106
18	5	-9.77137	0	-113.704	13.9207	-109.411	354.931	-3204.05	354.063	-3209.31	0	354.063	-3209.31	-23.981	-113.704	-2992.93	19.7879	19.7879
18	6	-9.77137	0	-113.704	13.9207	-109.411	354.931	-3204.05	354.063	-3209.31	0	354.063	-3209.31	-23.981	-113.704	-2992.93	19.7879	19.7879
18	7	-9.77137	0	-113.704	13.9207	-109.411	354.931	-3204.05	354.063	-3209.31	0	354.063	-3209.31	-23.981	-113.704	-2992.93	19.7879	19.7879
19	0	-10.3081	0	-128.854	14.0276	-123.772	354.931	-3204.05	353.54	-3208.05	0	353.54	-3208.05	-14.2605	-128.854	-2997.62	19.7547	19.7547
19	1	-10.3081	0	-128.854	14.0276	-123.772	354.931	-3204.05	353.54	-3208.05	0	353.54	-3208.05	-14.2605	-128.854	-2997.62	19.7547	19.7547
19	2	-10.2958	0	-128.563	14.0133	-123.931	354.931	-3204.05	353.547	-3208.49	0	353.547	-3208.49	-14.0306	-128.563	-2997.54	19.8952	19.8952
19	3	-10.2958	0	-128.563	14.0133	-123.931	354.931	-3204.05	353.547	-3208.49	0	353.547	-3208.49	-14.0306	-128.563	-2997.54	19.8952	19.8952
19	4	-10.2958	0	-128.563	14.0133	-123.931	354.931	-3204.05	353.547	-3208.49	0	353.547	-3208.49	-14.0306	-128.563	-2997.54	19.8952	19.8952
19	5	-10.2958	0	-128.563	14.0133	-123.931	354.931	-3204.05	353.547	-3208.49	0	353.547	-3208.49	-14.0306	-128.563	-2997.54	19.8952	19.8952
19	6	-10.2068	0	-127.34	14.0445	-123.988	354.931	-3204.05	353.583	-3208.99	0	353.583	-3208.99	-14.2247	-127.34	-2996.97	20.7315	20.7315
19	7	-10.2068	0	-127.34	14.0445	-123.988	354.931	-3204.05	353.583	-3208.99	0	353.583	-3208.99	-14.2247	-127.34	-2996.97	20.7315	20.7315
20	0	-10.1987	0	-117.611	12.609	-79.964	354.931	-3204.05	353.53	-3182.01	0	353.53	-3182.01	-50.9513	-117.611	-2997.04	5.85879	5.85879
20	1	-10.1987	0	-117.611	12.609	-79.964	354.931	-3204.05	353.53	-3182.01	0	353.53	-3182.01	-50.9513	-117.611	-2997.04	5.85879	5.85879
20	2	-10.1987	0	-117.611	12.609	-79.964	354.931	-3204.05	353.53	-3182.01	0	353.53	-3182.01	-50.9513	-117.611	-2997.04	5.85879	5.85879
20	3	-10.1987	0	-117.611	12.609	-79.964	354.931	-3204.05	353.53	-3182.01	0	353.53	-3182.01	-50.9513	-117.611	-2997.04	5.85879	5.85879
20	4	-10.201	0	-117.729	12.6286	-82.4537	354.931	-3204.05	353.469	-3184.23	0	353.469	-3184.23	-47.6089	-117.729	-2996.1	6.71729	6.71729
20	5	-9.8098	0	-112.284	12.6958	-78.8053	354.931	-3204.05	353.435	-3182.45	0	353.435	-3182.45	-50.9349	-112.284	-2992.23	8.42266	8.42266
20	6	-9.8098	0	-112.284	12.6958	-78.8053	354.931	-3204.05	353.435	-3182.45	0	353.435	-3182.45	-50.9349	-112.284	-2992.23	8.42266	8.42266
20	7	-9.8098	0	-112.284	12.6958	-78.8053	354.931	-3204.05	353.435	-3182.45	0	353.435	-3182.45	-50.9349	-112.284	-2992.23	8.42266	8.42266
21	0	-10.1564	0	-116.272	13.9217	-107.28	354.931	-3204.05	355.137	-3211.16	0	355.137	-3211.16	-24.5575	-116.272	-2996.85	10.4453	10.4453
21	1	-10.1564	0	-116.272	13.9217	-107.28	354.931	-3204.05	355.137	-3211.16	0	355.137	-3211.16	-24.5575	-116.272	-2996.85	10.4453	10.4453
21	2	-10.1564	0	-116.272	13.9217	-107.28	354.931	-3204.05	355.137	-3211.16	0	355.137	-3211.16	-24.5575	-116.272	-2996.85	10.4453	10.4453
21	3	-10.1564	0	-116.272	13.9217	-107.28	354.931	-3204.05	355.137	-3211.16	0	355.137	-3211.16	-24.5575	-116.272	-2996.85	10.4453	10.4453
21	4	-10.1691	0	-116.138	13.9021	-106.262	354.931	-3204.05	355.055	-3210.46	0	355.055	-3210.46	-24.6519	-116.138	-2996.19	10.6408	10.6408
21	5	-10.1691	0	-116.138	13.9021	-106.262	354.931	-3204.05	355.055	-3210.46	0	355.055	-3210.46	-24.6519	-116.138	-2996.19	10.6408	10.6408
21	6	-9.83449	0	-109.946	13.8688	-101.303	354.931	-3204.05	355.077	-3209.69	0	355.077	-3209.69	-30.8934	-109.946	-2995.45	11.0782	11.0782
21	7	-9.83449	0	-109.946	13.8688	-101.303	354.931	-3204.05	355.077	-3209.69	0	355.077	-3209.69	-30.8934	-109.946	-2995.45	11.0782	11.0782
22	0	-10.0255	0	-106.383	14.0238	-114.467	354.931	-3204.05	353.639	-3229.02	0	353.639	-3229.02	-14.7783	-106.383	-2996.54	17.0564	17.0564
22	1	-9.8815	0	-104.135	14.0171	-115.205	354.931	-3204.05	353.574	-3230.79	0	353.574	-3230.79	-14.6494	-104.135	-2996	17.5096	17.5096
22	2	-9.8604	0	-104.219	14.0199	-115.55	354.931	-3204.05	353.486	-3230.52	0	353.486	-3230.52	-14.6965	-104.219	-2995.95	17.6278	17.6278
22	3	-9.25915	0	-101.124	14.1452	-126.368	354.931	-3204.05	353.341	-3235.88	0	353.341	-3235.88	-4.1143	-101.124	-2987.78	19.6728	19.6728
22	4	-9.25915	0	-101.124	14.1452	-126.368	354.931	-3204.05	353.341	-3235.88	0	353.341	-3235.88	-4.1143	-101.124	-2987.78	19.6728	19.6728
22	5	-8.99219	0	-96.5376	14.1589	-127.341	354.931	-3204.05	353.361	-3239.59	0	353.361	-3239.59	-4.96018	-96.5376	-2987.73	20.1659	20.1659
22	6	-9.19422	0	-100.608	14.1625	-126.509	354.931	-3204.05	353.321	-3235.7	0	353.321	-3235.7	-3.99211	-100.608	-2986.98	19.7524	19.7524
22	7	-9.19422	0	-100.608	14.1625	-126.509	354.931	-3204.05	353.321	-3235.7	0	353.321	-3235.7	-3.99211	-100.608	-2986.98	19.7524	19.7524
23	0	-10.469	0	-130.339	13.8807	-112.948	354.931	-3204.05	353.09	-3197.09	0	353.09	-3197.09	-22.2029	-130.339	-2996.54	7.5563	7.5563
23	1	-10.469	0	-130.339	13.8807	-112.948	354.931	-3204.05	353.09	-3197.09	0	353.09	-3197.09	-22.2029	-130.339	-2996.54	7.5563	7.5563
23	2	-10.3423	0	-129.211	13.8783	-113.908	354.931	-3204.05	353.137	-3197.8	0	353.137	-3197.8	-21.6856	-129.211	-2995.56	7.11086	7.11086
23	3	-10.3423	0	-129.211	13.8783	-113.908	354.931	-3204.05	353.137	-3197.8	0	353.137	-3197.8	-21.6856	-129.211	-2995.56	7.11086	7.11086
23	4	-9.65269	0	-115.12	13.8491	-106.806	354.931	-3204.05	353.094	-3201.19	0	353.094	-3201.19	-30.9252	-115.12	-2994.14	7.90135	7.90135
23	5	-9.65269	0	-115.12	13.8491	-106.806	354.931	-3204.05	353.094	-3201.19	0	353.094	-3201.19	-30.9252	-115.12	-2994.14	7.90135	7.90135
23	6	-9.65269	0	-115.12	13.8491	-106.806	354.931	-3204.05	353.094	-3201.19	0	353.094	-3201.19	-30.9252	-115.12	-2994.14	7.90135	7.90135
23	7	-9.65269	0	-115.12	13.8491	-106.806	354.931	-3204.05	353.094	-3201.19	0	353.094	-3201.19	-30.9252	-115.12	-2994.14	7.90135	7.90135
24	0	-9.73078	0	-113.837	13.9922	-119.065	354.931	-3204.05	353.73	-3217.47	0	353.73	-3217.47	-18.4896	-113.837	-2996.07	13.5263	13.5263
24	1	-9.73078	0	-113.837	13.9922	-119.065	354.931	-3204.05	353.73	-3217.47	0	353.73	-3217.47	-18.4896	-113.837	-2996.07	13.5263	13.5263
24	2	-9.73078	0	-113.837	13.9922	-119.065	354.931	-3204.05	353.73	-3217.47	0	353.73	-3217.47	-18.4896	-113.837	-2996.07	13.5263	13.5263
24	3	-9.60095	0	-113.627	14.0251	-120.58	354.931	-3204.05	353.68	-3217.06	0	353.68	-3217.06	-17.3755	-113.627	-2994.38	14.1988	14.1988
24	4	-9.60095	0	-113.627	14.0251	-120.58	354.931	-3204.05	353.68	-3217.06	0	353.68	-3217.06	-17.3755	-113.627	-2994.38	14.1988	14.1988
24	5	-9.33933	0	-109.077	14.0398	-120.557	354.931	-3204.05	353.62	-3219.68	0	353.62	-3219.68	-17.4325	-109.077	-2992.57	14.7611	14.7611
24	6	-9.33933	0	-109.077	14.0398	-120.557	354.931	-3204.05	353.62	-3219.68	0	353.62	-3219.68	-17.4325	-109.077	-2992.57	14.7611	14.7611
24	7	-9.33933	0	-109.077	14.0398	-120.557	354.931	-3204.05	353.62	-3219.68	0	353.62	-3219.68	-17.4325	-109.077	-2992.57	14.7611	14.7611
25	0	-8.8975	0	-88.8221	13.5355	-84.7497	354.931	-3204.05	351.471	-3205.42	0	351.471	-3205.42	-52.9867	-88.8221	-2995.76	4.11972	4.11972
25	1	-8.8975	0	-88.8221	13.5355	-84.7497	354.931	-3204.05	351.471	-3205.42	0	351.471	-3205.42	-52.9867	-88.8221	-2995.76	4.11972	4.11972
25	2	-8.8975	0	-88.8221	13.5355	-84.7497	354.931	-3204.05	351.471	-3205.42	0	351.471	-3205.42	-52.9867	-88.8221	-2995.76	4.11972	4.11972
25	3	-8.8975	0	-88.8221	13.5355	-84.7497	354.931	-3204.05	351.471	-3205.42	0	351.471	-3205.42	-52.9867	-88.8221	-2995.76	4.11972	4.11972
25	4	-8.8975	0	-88.8221	13.5355	-84.7497	354.931	-3204.05	351.471	-3205.42	0	351.471	-3205.42	-52.9867	-88.8221	-2995.76	4.11972	4.11972
25	5	-8.8975	0	-88.8221	13.5355	-84.7497	354.931	-3204.05	351.471	-3205.42	0	351.471	-3205.42	-52.9867	-88.8221	-2995.76	4.11972	4.11972
25	6	-8.91225	0	-88.9078	13.5336	-84.7521	354.931	-3204.05	351.488	-3205.56	0	351.488	-3205.56	-52.7327	-88.9078	-2995.71	4.15016	4.15016
25	7	-8.91478	0	-89.112	13.5144	-85.4082	354.931	-3204.05	351.487	-3205.97	0	351.487	-3205.97	-51.8101	-89.112	-2995.41	4.41303	4.41303
25	8	-9.02303	0	-93.0917	13.1172	-113.794	354.931	-3204.05	351.89	-3231.21	0	351.89	-3231.21	-18.7993	-93.0917	-2991.21	8.81135	8.81135
25	9	-9.01324	0	-93.0633	13.0932	-113.464	354.931	-3204.05	351.87	-3230.77	0	351.87	-3230.77	-19.1762	-93.0633	-2991.14	8.80489	8.80489
25	10	-9.00735	0	-93.1084	13.1003	-115.68	354.931	-3204.05	351.89	-3232.84	0	351.89	-3232.84	-15.9624	-93.1084	-2990.02	9.8872	9.8872
26	0	-9.721	0	-110.449	13.2013	-113.509	354.931	-3204.05	352.492	-3216.3	0	352.492	-3216.3	-20.9959	-110.449	-2995.25	8.35175	8.35175
26	1	-9.721	0	-110.449	13.2013	-113.509	354.931	-3204.05	352.492	-3216.3	0	352.492	-3216.3	-20.9959	-110.449	-2995.25	8.35175	8.35175
26	2	-9.721	0	-110.449	13.2013	-113.509	354.931	-3204.05	352.492	-3216.3	0	352.492	-3216.3	-20.9959	-110.449	-2995.25	8.35175	8.35175
26	3	-9.80122	0	-113.026	13.2237	-114.433	354.931	-3204.05	352.52	-3214.56	0	352.52	-3214.56	-19.4334	-113.026	-2994.5	8.3095	8.3095
26	4	-9.80122	0	-113.026	13.2237	-114.433	354.931	-3204.05	352.52	-3214.56	0	352.52	-3214.56	-19.4334	-113.026	-2994.5	8.3095	8.3095
26	5	-9.80122	0	-113.026	13.2237	-114.433	354.931	-3204.05	352.52	-3214.56	0	352.52	-3214.56	-19.4334	-113.026	-2994.5	8.3095	8.3095
26	6	-9.78447	0	-112.393	13.2251	-114.412	354.931	-3204.05	352.48	-3215.18	0	352.48	-3215.18	-19.1837	-112.393	-2994.28	8.5109	8.5109
26	7	-9.78447	0	-112.393	13.2251	-114.412	354.931	-3204.05	352.48	-3215.18	0	352.48	-3215.18	-19.1837	-112.393	-2994.28	8.5109	8.5109
27	0	-9.33826	0	-100.077	13.6851	-100.008	354.931	-3204.05	354.724	-3215.28	0	354.724	-3215.28	-34.292	-100.077	-2994.92	18.7745	18.7745
27	1	-9.33826	0	-100.077	13.6851	-100.008	354.931	-3204.05	354.724	-3215.28	0	354.724	-3215.28	-34.292	-100.077	-2994.92	18.7745	18.7745
27	2	-9.36427	0	-100.597	13.6926	-100.548	354.931	-3204.05	354.679	-3215.36	0	354.679	-3215.36	-33.5882	-100.597	-2994.87	19.007	19.007
27	3	-9.36427	0	-100.597	13.6926	-100.548	354.931	-3204.05	354.679	-3215.36	0	354.679	-3215.36	-33.5882	-100.597	-2994.87	19.007	19.007
27	4	-9.36427	0	-100.597	13.6926	-100.548	354.931	-3204.05	354.679	-3215.36	0	354.679	-3215.36	-33.5882	-100.597	-2994.87	19.007	19.007
27	5	-9.36427	0	-100.597	13.6926	-100.548	354.931	-3204.05	354.679	-3215.36	0	354.679	-3215.36	-33.5882	-100.597	-2994.87	19.007	19.007
27	6	-9.26349	0	-98.0767	13.6796	-100.057	354.931	-3204.05	354.706	-3217.18	0	354.706	-3217.18	-34.1303	-98.0767	-2994.68	19.2239	19.2239
27	7	-9.26349	0	-98.0767	13.6796	-100.057	354.931	-3204.05	354.706	-3217.18	0	354.706	-3217.18	-34.1303	-98.0767	-2994.68	19.2239	19.2239
28	0	-9.91737	0	-111.102	13.3889	-84.2916	354.931	-3204.05	351.378	-3187.27	0	351.378	-3187.27	-47.3761	-111.102	-2994.37	0.422284	0.422284
28	1	-9.94319	0	-119.205	13.7216	-94.8502	354.931	-3204.05	351.772	-3185.82	0	351.772	-3185.82	-33.5138	-119.205	-2986.77	-4.20218	-4.20218
28	2	-9.85338	0	-114.387	13.7827	-89.768	354.931	-3204.05	351.524	-3186.24	0	351.524	-3186.24	-37.088	-114.387	-2986.19	5.12318	5.12318
28	3	-9.80127	0	-116.575	13.7004	-90.8094	354.931	-3204.05	351.566	-3183.24	0	351.566	-3183.24	-33.1387	-116.575	-2981.39	4.20721	4.20721
28	4	-10.45	0	-131.964	13.898	-89.0116	354.931	-3204.05	351.45	-3167.77	0	351.45	-3167.77	-32.5188	-131.964	-2980.8	3.06811	3.06811
28	5	-9.76317	0	-117.271	13.6867	-91.2263	354.931	-3204.05	351.398	-3181.72	0	351.398	-3181.72	-32.8904	-117.271	-2980.48	3.51347	3.51347
28	6	-9.44778	0	-116.029	13.941	-93.5782	354.931	-3204.05	351.414	-3180.47	0	351.414	-3180.47	-24.0014	-116.029	-2969.09	10.3324	10.3324
29	0	-10.1713	0	-125.194	13.6936	-104.892	354.931	-3204.05	353.127	-3192.47	0	353.127	-3192.47	-29.4253	-125.194	-2993.96	8.23445	8.23445
29	1	-10.1713	0	-125.194	13.6936	-104.892	354.931	-3204.05	353.127	-3192.47	0	353.127	-3192.47	-29.4253	-125.194	-2993.96	8.23445	8.23445
29	2	-9.68162	0	-116.649	13.7963	-111.222	354.931	-3204.05	353.452	-3204.35	0	353.452	-3204.35	-25.8044	-116.649	-2993.35	7.03333	7.03333
29	3	-9.68162	0	-116.649	13.7963	-111.222	354.931	-3204.05	353.452	-3204.35	0	353.452	-3204.35	-25.8044	-116.649	-2993.35	7.03333	7.03333
29	4	-9.68162	0	-116.649	13.7963	-111.222	354.931	-3204.05	353.452	-3204.35	0	353.452	-3204.35	-25.8044	-116.649	-2993.35	7.03333	7.03333
29	5	-9.6827	0	-116.643	13.795	-111.292	354.931	-3204.05	353.459	-3204.46	0	353.459	-3204.46	-25.7012	-116.643	-2993.35	7.01742	7.01742
29	6	-9.6827	0	-116.643	13.795	-111.292	354.931	-3204.05	353.459	-3204.46	0	353.459	-3204.46	-25.7012	-116.643	-2993.35	7.01742	7.01742
29	7	-9.6827	0	-116.643	13.795	-111.292	354.931	-3204.05	353.459	-3204.46	0	353.459	-3204.46	-25.7012	-116.643	-2993.35	7.01742	7.01742
30	0	-9.4016	0	-107.192	14.3035	-129.047	354.931	-3204.05	353.333	-3231.25	0	353.333	-3231.25	-7.8621	-107.192	-2992.97	12.2342	12.2342
30	1	-9.4016	0	-107.192	14.3035	-129.047	354.931	-3204.05	353.333	-3231.25	0	353.333	-3231.25	-7.8621	-107.192	-2992.97	12.2342	12.2342
30	2	-9.4016	0	-107.192	14.3035	-129.047	354.931	-3204.05	353.333	-3231.25	0	353.333	-3231.25	-7.8621	-107.192	-2992.97	12.2342	12.2342
30	3	-9.31608	0	-105.329	14.3228	-130.17	354.931	-3204.05	353.349	-3233.85	0	353.349	-3233.85	-5.99995	-105.329	-2991.83	13.3695	13.3695
30	4	-9.31608	0	-105.329	14.3228	-130.17	354.931	-3204.05	353.349	-3233.85	0	353.349	-3233.85	-5.99995	-105.329	-2991.83	13.3695	13.3695
30	5	-9.16742	0	-102.054	14.4295	-121.61	354.931	-3204.05	353.667	-3228.25	0	353.667	-3228.25	-13.3369	-102.054	-2989.97	19.4788	19.4788
30	6	-9.16742	0	-102.054	14.4295	-121.61	354.931	-3204.05	353.667	-3228.25	0	353.667	-3228.25	-13.3369	-102.054	-2989.97	19.4788	19.4788
30	7	-9.16742	0	-102.054	14.4295	-121.61	354.931	-3204.05	353.667	-3228.25	0	353.667	-3228.25	-13.3369	-102.054	-2989.97	19.4788	19.4788
31	0	-9.58873	0	-104.779	13.2832	-104.228	354.931	-3204.05	352.055	-3212.82	0	352.055	-3212.82	-19.4409	-104.779	-2984.99	18.5983	18.5983
31	1	-9.6159	0	-105.062	13.3052	-104.127	354.931	-3204.05	352.028	-3212.65	0	352.028	-3212.65	-19.1444	-105.062	-2984.83	18.6046	18.6046
31	2	-9.55233	0	-104.44	13.2942	-104.343	354.931	-3204.05	351.979	-3212.73	0	351.979	-3212.73	-18.9562	-104.44	-2984.15	18.6526	18.6526
32	0	-9.00505	0	-106.119	13.6124	-96.3082	354.931	-3204.05	352.092	-3192.84	0	352.092	-3192.84	-31.8517	-106.119	-2978.72	1.33794	1.33794

## Sheet: (F) Gdh mu SwissDock scores
Cluster	ClusterRank	deltaG	deltaGelec	deltaGvdw	deltaGligsolvnonpol	deltaGligsolvpol	deltaGprotsolvnonpol	deltaGprotsolvpol	deltaGcompsolvnonpol	deltaGcompsolvpol	extraFull	surfFull	solvFull	IntraFull	InterFull	FullFitness	SimpleFitness	Energy
0	0	-11.5035	0	-132.809	13.572	-106.758	354.998	-3198.23	353.026	-3198.44	0	353.026	-3198.44	-27.571	-132.809	-3005.79	-6.69773	-6.69773
0	1	-11.3999	0	-132.045	13.6035	-106.168	354.998	-3198.23	353.032	-3197.3	0	353.032	-3197.3	-29.2439	-132.045	-3005.56	-6.50299	-6.50299
0	2	-10.8215	0	-119.421	13.8395	-98.0702	354.998	-3198.23	353.304	-3199.32	0	353.304	-3199.32	-37.822	-119.421	-3003.26	-2.25612	-2.25612
0	3	-11.256	0	-132.117	13.6445	-107.509	354.998	-3198.23	352.906	-3195.92	0	352.906	-3195.92	-27.9523	-132.117	-3003.08	-5.8841	-5.8841
0	4	-10.7004	0	-118.452	13.8632	-97.9797	354.998	-3198.23	353.219	-3198.58	0	353.219	-3198.58	-38.4139	-118.452	-3002.23	-1.79005	-1.79005
0	5	-9.29292	0	-114.041	14.2583	-121.995	354.998	-3198.23	352.795	-3205.15	0	352.795	-3205.15	-7.87244	-114.041	-2974.27	10.6853	10.6853
0	6	-9.2518	0	-113.371	14.2585	-122.129	354.998	-3198.23	352.758	-3205.59	0	352.758	-3205.59	-8.02675	-113.371	-2974.23	10.6267	10.6267
0	7	-9.28899	0	-114.186	14.2545	-122.224	354.998	-3198.23	352.765	-3205.05	0	352.765	-3205.05	-7.70627	-114.186	-2974.18	10.6063	10.6063
1	0	-10.0458	0	-110.74	13.3138	-107.922	354.998	-3198.23	351.74	-3208.31	0	351.74	-3208.31	-30.239	-110.74	-2997.55	4.60315	4.60315
1	1	-10.0458	0	-110.74	13.3138	-107.922	354.998	-3198.23	351.74	-3208.31	0	351.74	-3208.31	-30.239	-110.74	-2997.55	4.60315	4.60315
1	2	-9.83519	0	-109.941	13.6811	-123.762	354.998	-3198.23	351.781	-3221.44	0	351.781	-3221.44	-12.915	-109.941	-2992.51	6.03463	6.03463
1	3	-9.53919	0	-105.465	13.5299	-120.529	354.998	-3198.23	351.831	-3220.6	0	351.831	-3220.6	-14.841	-105.465	-2989.07	10.333	10.333
1	4	-8.7523	0	-96.4297	14.0253	-114.384	354.998	-3198.23	352.408	-3215.69	0	352.408	-3215.69	-8.10256	-96.4297	-2967.81	26.9384	26.9384
1	5	-8.7523	0	-96.4297	14.0253	-114.384	354.998	-3198.23	352.408	-3215.69	0	352.408	-3215.69	-8.10256	-96.4297	-2967.81	26.9384	26.9384
1	6	-8.40528	0	-84.8393	13.8572	-104.762	354.998	-3198.23	352.464	-3218.66	0	352.464	-3218.66	-14.2458	-84.8393	-2965.28	29.2575	29.2575
1	7	-9.08207	0	-99.3133	13.9279	-113.212	354.998	-3198.23	352.79	-3216.19	0	352.79	-3216.19	-2.06849	-99.3133	-2964.78	32.3892	32.3892
2	0	-12.5949	0	-175.339	14.4104	-132.74	354.998	-3198.23	352.198	-3173.94	0	352.198	-3173.94	0.504596	-175.339	-2996.58	-0.590134	-0.590134
2	1	-12.5949	0	-175.339	14.4104	-132.74	354.998	-3198.23	352.198	-3173.94	0	352.198	-3173.94	0.504596	-175.339	-2996.58	-0.590134	-0.590134
2	2	-12.4948	0	-174.045	14.3792	-133.053	354.998	-3198.23	352.149	-3174.59	0	352.149	-3174.59	1.81391	-174.045	-2994.67	0.547673	0.547673
2	3	-12.092	0	-166.382	14.3304	-131.505	354.998	-3198.23	352.129	-3178.35	0	352.129	-3178.35	0.299864	-166.382	-2992.3	2.53698	2.53698
2	4	-12.092	0	-166.382	14.3304	-131.505	354.998	-3198.23	352.129	-3178.35	0	352.129	-3178.35	0.299864	-166.382	-2992.3	2.53698	2.53698
2	5	-12.092	0	-166.382	14.3304	-131.505	354.998	-3198.23	352.129	-3178.35	0	352.129	-3178.35	0.299864	-166.382	-2992.3	2.53698	2.53698
2	6	-12.092	0	-166.382	14.3304	-131.505	354.998	-3198.23	352.129	-3178.35	0	352.129	-3178.35	0.299864	-166.382	-2992.3	2.53698	2.53698
2	7	-12.092	0	-166.382	14.3304	-131.505	354.998	-3198.23	352.129	-3178.35	0	352.129	-3178.35	0.299864	-166.382	-2992.3	2.53698	2.53698
3	0	-10.5175	0	-115.968	13.4781	-92.4764	354.998	-3198.23	352.408	-3193.27	0	352.408	-3193.27	-39.529	-115.968	-2996.36	10.3499	10.3499
3	1	-10.5175	0	-115.968	13.4781	-92.4764	354.998	-3198.23	352.408	-3193.27	0	352.408	-3193.27	-39.529	-115.968	-2996.36	10.3499	10.3499
3	2	-10.083	0	-110.954	13.5798	-96.0011	354.998	-3198.23	352.707	-3197.75	0	352.707	-3197.75	-37.7492	-110.954	-2993.75	12.7617	12.7617
3	3	-10.083	0	-110.954	13.5798	-96.0011	354.998	-3198.23	352.707	-3197.75	0	352.707	-3197.75	-37.7492	-110.954	-2993.75	12.7617	12.7617
3	4	-10.083	0	-110.954	13.5798	-96.0011	354.998	-3198.23	352.707	-3197.75	0	352.707	-3197.75	-37.7492	-110.954	-2993.75	12.7617	12.7617
3	5	-9.57212	0	-105.081	13.6013	-94.2953	354.998	-3198.23	352.9	-3197.04	0	352.9	-3197.04	-39.8885	-105.081	-2989.11	15.0584	15.0584
3	6	-9.57212	0	-105.081	13.6013	-94.2953	354.998	-3198.23	352.9	-3197.04	0	352.9	-3197.04	-39.8885	-105.081	-2989.11	15.0584	15.0584
3	7	-9.57212	0	-105.081	13.6013	-94.2953	354.998	-3198.23	352.9	-3197.04	0	352.9	-3197.04	-39.8885	-105.081	-2989.11	15.0584	15.0584
4	0	-10.3002	0	-116.534	13.5141	-93.5298	354.998	-3198.23	352.044	-3189.28	0	352.044	-3189.28	-42.2735	-116.534	-2996.04	5.25438	5.25438
4	1	-10.3002	0	-116.534	13.5141	-93.5298	354.998	-3198.23	352.044	-3189.28	0	352.044	-3189.28	-42.2735	-116.534	-2996.04	5.25438	5.25438
4	2	-10.3002	0	-116.534	13.5141	-93.5298	354.998	-3198.23	352.044	-3189.28	0	352.044	-3189.28	-42.2735	-116.534	-2996.04	5.25438	5.25438
4	3	-10.1739	0	-114.499	14.0103	-98.5998	354.998	-3198.23	352.403	-3195.22	0	352.403	-3195.22	-36.81	-114.499	-2994.13	9.47026	9.47026
4	4	-9.89866	0	-110.345	13.814	-95.4024	354.998	-3198.23	352.216	-3193.96	0	352.216	-3193.96	-37.732	-110.345	-2989.82	9.9773	9.9773
4	5	-9.89866	0	-110.345	13.814	-95.4024	354.998	-3198.23	352.216	-3193.96	0	352.216	-3193.96	-37.732	-110.345	-2989.82	9.9773	9.9773
4	6	-9.89866	0	-110.345	13.814	-95.4024	354.998	-3198.23	352.216	-3193.96	0	352.216	-3193.96	-37.732	-110.345	-2989.82	9.9773	9.9773
4	7	-9.89866	0	-110.345	13.814	-95.4024	354.998	-3198.23	352.216	-3193.96	0	352.216	-3193.96	-37.732	-110.345	-2989.82	9.9773	9.9773
5	0	-10.7116	0	-129.852	13.8463	-111.19	354.998	-3198.23	352.586	-3193.4	0	352.586	-3193.4	-24.6289	-129.852	-2995.3	2.84813	2.84813
5	1	-10.7116	0	-129.852	13.8463	-111.19	354.998	-3198.23	352.586	-3193.4	0	352.586	-3193.4	-24.6289	-129.852	-2995.3	2.84813	2.84813
5	2	-10.6997	0	-129.841	13.8623	-111.731	354.998	-3198.23	352.606	-3193.77	0	352.606	-3193.77	-24.2062	-129.841	-2995.21	3.01615	3.01615
5	3	-10.6997	0	-129.841	13.8623	-111.731	354.998	-3198.23	352.606	-3193.77	0	352.606	-3193.77	-24.2062	-129.841	-2995.21	3.01615	3.01615
5	4	-10.7234	0	-129.997	13.8496	-111.206	354.998	-3198.23	352.586	-3193.38	0	352.586	-3193.38	-24.4133	-129.997	-2995.2	2.88271	2.88271
5	5	-10.7234	0	-129.997	13.8496	-111.206	354.998	-3198.23	352.586	-3193.38	0	352.586	-3193.38	-24.4133	-129.997	-2995.2	2.88271	2.88271
5	6	-10.7234	0	-129.997	13.8496	-111.206	354.998	-3198.23	352.586	-3193.38	0	352.586	-3193.38	-24.4133	-129.997	-2995.2	2.88271	2.88271
5	7	-10.7234	0	-129.997	13.8496	-111.206	354.998	-3198.23	352.586	-3193.38	0	352.586	-3193.38	-24.4133	-129.997	-2995.2	2.88271	2.88271
6	0	-10.8527	0	-127.974	14.0606	-99.382	354.998	-3198.23	352.774	-3186.76	0	352.774	-3186.76	-33.0973	-127.974	-2995.06	5.67997	5.67997
6	1	-10.6557	0	-129.358	13.8323	-96.4871	354.998	-3198.23	352.522	-3178.47	0	352.522	-3178.47	-36.6397	-129.358	-2991.95	4.89527	4.89527
6	2	-10.6557	0	-129.358	13.8323	-96.4871	354.998	-3198.23	352.522	-3178.47	0	352.522	-3178.47	-36.6397	-129.358	-2991.95	4.89527	4.89527
6	3	-10.6557	0	-129.358	13.8323	-96.4871	354.998	-3198.23	352.522	-3178.47	0	352.522	-3178.47	-36.6397	-129.358	-2991.95	4.89527	4.89527
6	4	-10.3421	0	-122.088	13.7742	-92.1141	354.998	-3198.23	352.651	-3180.5	0	352.651	-3180.5	-40.9792	-122.088	-2990.92	5.39511	5.39511
6	5	-10.3421	0	-122.088	13.7742	-92.1141	354.998	-3198.23	352.651	-3180.5	0	352.651	-3180.5	-40.9792	-122.088	-2990.92	5.39511	5.39511
6	6	-10.3421	0	-122.088	13.7742	-92.1141	354.998	-3198.23	352.651	-3180.5	0	352.651	-3180.5	-40.9792	-122.088	-2990.92	5.39511	5.39511
6	7	-10.3421	0	-122.088	13.7742	-92.1141	354.998	-3198.23	352.651	-3180.5	0	352.651	-3180.5	-40.9792	-122.088	-2990.92	5.39511	5.39511
7	0	-9.84987	0	-109.227	13.652	-98.8873	354.998	-3198.23	354.127	-3201.58	0	354.127	-3201.58	-36.7395	-109.227	-2993.42	15.056	15.056
7	1	-9.84987	0	-109.227	13.652	-98.8873	354.998	-3198.23	354.127	-3201.58	0	354.127	-3201.58	-36.7395	-109.227	-2993.42	15.056	15.056
7	2	-9.84987	0	-109.227	13.652	-98.8873	354.998	-3198.23	354.127	-3201.58	0	354.127	-3201.58	-36.7395	-109.227	-2993.42	15.056	15.056
7	3	-9.58407	0	-103.979	13.803	-102.121	354.998	-3198.23	354.218	-3208.49	0	354.218	-3208.49	-34.6827	-103.979	-2992.93	18.5417	18.5417
7	4	-9.58407	0	-103.979	13.803	-102.121	354.998	-3198.23	354.218	-3208.49	0	354.218	-3208.49	-34.6827	-103.979	-2992.93	18.5417	18.5417
7	5	-9.58407	0	-103.979	13.803	-102.121	354.998	-3198.23	354.218	-3208.49	0	354.218	-3208.49	-34.6827	-103.979	-2992.93	18.5417	18.5417
7	6	-9.16298	0	-98.5446	13.7527	-102.985	354.998	-3198.23	353.913	-3210.48	0	353.913	-3210.48	-33.8303	-98.5446	-2988.94	19.1642	19.1642
7	7	-9.16298	0	-98.5446	13.7527	-102.985	354.998	-3198.23	353.913	-3210.48	0	353.913	-3210.48	-33.8303	-98.5446	-2988.94	19.1642	19.1642
8	0	-9.62391	0	-103.626	13.3993	-91.4583	354.998	-3198.23	353.042	-3197.83	0	353.042	-3197.83	-44.8512	-103.626	-2993.27	6.75269	6.75269
8	1	-9.62391	0	-103.626	13.3993	-91.4583	354.998	-3198.23	353.042	-3197.83	0	353.042	-3197.83	-44.8512	-103.626	-2993.27	6.75269	6.75269
8	2	-9.62391	0	-103.626	13.3993	-91.4583	354.998	-3198.23	353.042	-3197.83	0	353.042	-3197.83	-44.8512	-103.626	-2993.27	6.75269	6.75269
8	3	-9.62391	0	-103.626	13.3993	-91.4583	354.998	-3198.23	353.042	-3197.83	0	353.042	-3197.83	-44.8512	-103.626	-2993.27	6.75269	6.75269
8	4	-9.62391	0	-103.626	13.3993	-91.4583	354.998	-3198.23	353.042	-3197.83	0	353.042	-3197.83	-44.8512	-103.626	-2993.27	6.75269	6.75269
8	5	-10.3829	0	-121.027	13.5631	-101.047	354.998	-3198.23	353.126	-3192.8	0	353.126	-3192.8	-32.4909	-121.027	-2993.19	8.1043	8.1043
8	6	-10.3829	0	-121.027	13.5631	-101.047	354.998	-3198.23	353.126	-3192.8	0	353.126	-3192.8	-32.4909	-121.027	-2993.19	8.1043	8.1043
8	7	-10.1195	0	-117.345	13.4923	-100.661	354.998	-3198.23	353.255	-3194.11	0	353.255	-3194.11	-34.6552	-117.345	-2992.86	6.95738	6.95738
9	0	-9.24518	0	-100.543	13.8345	-94.0254	354.998	-3198.23	352.504	-3197.47	0	352.504	-3197.47	-46.9964	-100.543	-2992.51	-1.90646	-1.90646
9	1	-9.24518	0	-100.543	13.8345	-94.0254	354.998	-3198.23	352.504	-3197.47	0	352.504	-3197.47	-46.9964	-100.543	-2992.51	-1.90646	-1.90646
9	2	-9.24518	0	-100.543	13.8345	-94.0254	354.998	-3198.23	352.504	-3197.47	0	352.504	-3197.47	-46.9964	-100.543	-2992.51	-1.90646	-1.90646
9	3	-9.24518	0	-100.543	13.8345	-94.0254	354.998	-3198.23	352.504	-3197.47	0	352.504	-3197.47	-46.9964	-100.543	-2992.51	-1.90646	-1.90646
9	4	-9.24518	0	-100.543	13.8345	-94.0254	354.998	-3198.23	352.504	-3197.47	0	352.504	-3197.47	-46.9964	-100.543	-2992.51	-1.90646	-1.90646
9	5	-9.20683	0	-100.686	13.8307	-94.1864	354.998	-3198.23	352.524	-3196.82	0	352.524	-3196.82	-47.0621	-100.686	-2992.04	-1.71649	-1.71649
9	6	-9.20683	0	-100.686	13.8307	-94.1864	354.998	-3198.23	352.524	-3196.82	0	352.524	-3196.82	-47.0621	-100.686	-2992.04	-1.71649	-1.71649
9	7	-9.09163	0	-99.6275	13.8296	-94.1064	354.998	-3198.23	352.708	-3196.78	0	352.708	-3196.78	-47.8196	-99.6275	-2991.52	-1.14564	-1.14564
9	8	-9.39925	0	-110.343	13.6519	-103.214	354.998	-3198.23	352.284	-3193.97	0	352.284	-3193.97	-35.707	-110.343	-2987.74	1.79428	1.79428
9	9	-9.39925	0	-110.343	13.6519	-103.214	354.998	-3198.23	352.284	-3193.97	0	352.284	-3193.97	-35.707	-110.343	-2987.74	1.79428	1.79428
9	10	-9.59291	0	-114.669	13.5793	-102.612	354.998	-3198.23	352.195	-3189.82	0	352.195	-3189.82	-34.7342	-114.669	-2987.03	1.64094	1.64094
9	11	-9.59291	0	-114.669	13.5793	-102.612	354.998	-3198.23	352.195	-3189.82	0	352.195	-3189.82	-34.7342	-114.669	-2987.03	1.64094	1.64094
9	12	-9.59291	0	-114.669	13.5793	-102.612	354.998	-3198.23	352.195	-3189.82	0	352.195	-3189.82	-34.7342	-114.669	-2987.03	1.64094	1.64094
9	13	-9.59291	0	-114.669	13.5793	-102.612	354.998	-3198.23	352.195	-3189.82	0	352.195	-3189.82	-34.7342	-114.669	-2987.03	1.64094	1.64094
9	14	-9.57476	0	-114.425	13.6071	-102.841	354.998	-3198.23	352.223	-3190.13	0	352.223	-3190.13	-34.4139	-114.425	-2986.75	1.73684	1.73684
9	15	-9.57476	0	-114.425	13.6071	-102.841	354.998	-3198.23	352.223	-3190.13	0	352.223	-3190.13	-34.4139	-114.425	-2986.75	1.73684	1.73684
10	0	-10.0726	0	-114.888	14.247	-115.306	354.998	-3198.23	353.688	-3211.29	0	353.688	-3211.29	-19.6827	-114.888	-2992.17	5.33039	5.33039
10	1	-10.0726	0	-114.888	14.247	-115.306	354.998	-3198.23	353.688	-3211.29	0	353.688	-3211.29	-19.6827	-114.888	-2992.17	5.33039	5.33039
10	2	-10.0726	0	-114.888	14.247	-115.306	354.998	-3198.23	353.688	-3211.29	0	353.688	-3211.29	-19.6827	-114.888	-2992.17	5.33039	5.33039
10	3	-10.2908	0	-118.434	14.3158	-116.58	354.998	-3198.23	353.661	-3210.5	0	353.661	-3210.5	-16.8232	-118.434	-2992.1	5.86028	5.86028
10	4	-10.2577	0	-116.789	14.3208	-119.437	354.998	-3198.23	353.641	-3215.32	0	353.641	-3215.32	-13.2093	-116.789	-2991.68	6.63674	6.63674
10	5	-10.2577	0	-116.789	14.3208	-119.437	354.998	-3198.23	353.641	-3215.32	0	353.641	-3215.32	-13.2093	-116.789	-2991.68	6.63674	6.63674
10	6	-10.2577	0	-116.789	14.3208	-119.437	354.998	-3198.23	353.641	-3215.32	0	353.641	-3215.32	-13.2093	-116.789	-2991.68	6.63674	6.63674
10	7	-10.2577	0	-116.789	14.3208	-119.437	354.998	-3198.23	353.641	-3215.32	0	353.641	-3215.32	-13.2093	-116.789	-2991.68	6.63674	6.63674
11	0	-9.34055	0	-88.9488	13.5342	-82.1518	354.998	-3198.23	353.461	-3207.02	0	353.461	-3207.02	-48.7401	-88.9488	-2991.25	13.5877	13.5877
11	1	-9.34055	0	-88.9488	13.5342	-82.1518	354.998	-3198.23	353.461	-3207.02	0	353.461	-3207.02	-48.7401	-88.9488	-2991.25	13.5877	13.5877
11	2	-9.34055	0	-88.9488	13.5342	-82.1518	354.998	-3198.23	353.461	-3207.02	0	353.461	-3207.02	-48.7401	-88.9488	-2991.25	13.5877	13.5877
11	3	-9.38012	0	-89.9058	13.5196	-82.0271	354.998	-3198.23	353.393	-3205.98	0	353.393	-3205.98	-48.5548	-89.9058	-2991.05	13.0848	13.0848
11	4	-9.38012	0	-89.9058	13.5196	-82.0271	354.998	-3198.23	353.393	-3205.98	0	353.393	-3205.98	-48.5548	-89.9058	-2991.05	13.0848	13.0848
11	5	-9.38012	0	-89.9058	13.5196	-82.0271	354.998	-3198.23	353.393	-3205.98	0	353.393	-3205.98	-48.5548	-89.9058	-2991.05	13.0848	13.0848
11	6	-9.32077	0	-89.1118	13.5469	-83.901	354.998	-3198.23	353.471	-3208.19	0	353.471	-3208.19	-45.5393	-89.1118	-2989.37	14.7561	14.7561
11	7	-9.32077	0	-89.1118	13.5469	-83.901	354.998	-3198.23	353.471	-3208.19	0	353.471	-3208.19	-45.5393	-89.1118	-2989.37	14.7561	14.7561
12	0	-9.29958	0	-102.505	14.1054	-103.432	354.998	-3198.23	353.019	-3205.11	0	353.019	-3205.11	-36.5415	-102.505	-2991.14	10.7959	10.7959
12	1	-9.29958	0	-102.505	14.1054	-103.432	354.998	-3198.23	353.019	-3205.11	0	353.019	-3205.11	-36.5415	-102.505	-2991.14	10.7959	10.7959
12	2	-9.29958	0	-102.505	14.1054	-103.432	354.998	-3198.23	353.019	-3205.11	0	353.019	-3205.11	-36.5415	-102.505	-2991.14	10.7959	10.7959
12	3	-9.02821	0	-97.2669	13.8671	-98.0695	354.998	-3198.23	353.24	-3204.12	0	353.24	-3204.12	-42.8285	-97.2669	-2990.98	10.3814	10.3814
12	4	-9.02821	0	-97.2669	13.8671	-98.0695	354.998	-3198.23	353.24	-3204.12	0	353.24	-3204.12	-42.8285	-97.2669	-2990.98	10.3814	10.3814
12	5	-9.20331	0	-100.584	14.138	-105.251	354.998	-3198.23	353.171	-3208.51	0	353.171	-3208.51	-34.8444	-100.584	-2990.77	11.259	11.259
12	6	-9.20331	0	-100.584	14.138	-105.251	354.998	-3198.23	353.171	-3208.51	0	353.171	-3208.51	-34.8444	-100.584	-2990.77	11.259	11.259
12	7	-9.20331	0	-100.584	14.138	-105.251	354.998	-3198.23	353.171	-3208.51	0	353.171	-3208.51	-34.8444	-100.584	-2990.77	11.259	11.259
13	0	-9.62431	0	-108.047	13.4044	-120.581	354.998	-3198.23	354.318	-3222.09	0	354.318	-3222.09	-15.218	-108.047	-2991.04	23.0213	23.0213
13	1	-9.62431	0	-108.047	13.4044	-120.581	354.998	-3198.23	354.318	-3222.09	0	354.318	-3222.09	-15.218	-108.047	-2991.04	23.0213	23.0213
13	2	-9.60914	0	-107.572	13.4029	-120.557	354.998	-3198.23	354.302	-3222.53	0	354.302	-3222.53	-14.913	-107.572	-2990.71	23.1252	23.1252
13	3	-9.60914	0	-107.572	13.4029	-120.557	354.998	-3198.23	354.302	-3222.53	0	354.302	-3222.53	-14.913	-107.572	-2990.71	23.1252	23.1252
13	4	-9.63847	0	-108.068	13.4109	-120.611	354.998	-3198.23	354.254	-3222.21	0	354.254	-3222.21	-14.3862	-108.068	-2990.41	23.2087	23.2087
13	5	-9.63847	0	-108.068	13.4109	-120.611	354.998	-3198.23	354.254	-3222.21	0	354.254	-3222.21	-14.3862	-108.068	-2990.41	23.2087	23.2087
13	6	-9.63847	0	-108.068	13.4109	-120.611	354.998	-3198.23	354.254	-3222.21	0	354.254	-3222.21	-14.3862	-108.068	-2990.41	23.2087	23.2087
13	7	-9.63847	0	-108.068	13.4109	-120.611	354.998	-3198.23	354.254	-3222.21	0	354.254	-3222.21	-14.3862	-108.068	-2990.41	23.2087	23.2087
14	0	-9.26263	0	-88.053	14.2624	-103.944	354.998	-3198.23	354.342	-3229.16	0	354.342	-3229.16	-27.5592	-88.053	-2990.43	27.7501	27.7501
14	1	-9.26263	0	-88.053	14.2624	-103.944	354.998	-3198.23	354.342	-3229.16	0	354.342	-3229.16	-27.5592	-88.053	-2990.43	27.7501	27.7501
14	2	-9.26263	0	-88.053	14.2624	-103.944	354.998	-3198.23	354.342	-3229.16	0	354.342	-3229.16	-27.5592	-88.053	-2990.43	27.7501	27.7501
14	3	-9.26263	0	-88.053	14.2624	-103.944	354.998	-3198.23	354.342	-3229.16	0	354.342	-3229.16	-27.5592	-88.053	-2990.43	27.7501	27.7501
14	4	-9.21936	0	-87.3057	14.2533	-103.789	354.998	-3198.23	354.318	-3229.43	0	354.318	-3229.43	-27.9561	-87.3057	-2990.37	27.6933	27.6933
14	5	-9.21936	0	-87.3057	14.2533	-103.789	354.998	-3198.23	354.318	-3229.43	0	354.318	-3229.43	-27.9561	-87.3057	-2990.37	27.6933	27.6933
14	6	-9.23656	0	-87.864	14.2384	-104.489	354.998	-3198.23	354.285	-3229.52	0	354.285	-3229.52	-27.1617	-87.864	-2990.26	27.5558	27.5558
14	7	-9.23656	0	-87.864	14.2384	-104.489	354.998	-3198.23	354.285	-3229.52	0	354.285	-3229.52	-27.1617	-87.864	-2990.26	27.5558	27.5558
15	0	-9.98553	0	-122.894	13.9298	-103.861	354.998	-3198.23	353.742	-3186.62	0	353.742	-3186.62	-34.5564	-122.894	-2990.33	15.0589	15.0589
15	1	-9.9615	0	-122.517	13.8888	-103.556	354.998	-3198.23	353.717	-3186.53	0	353.717	-3186.53	-34.889	-122.517	-2990.22	15.0124	15.0124
15	2	-9.52411	0	-114.295	13.9124	-103.01	354.998	-3198.23	353.756	-3191.57	0	353.756	-3191.57	-34.8904	-114.295	-2987	17.5205	17.5205
15	3	-10.0061	0	-129.61	14.1539	-109.175	354.998	-3198.23	353.527	-3181.21	0	353.527	-3181.21	-27.2342	-129.61	-2984.53	17.7653	17.7653
15	4	-10.0061	0	-129.61	14.1539	-109.175	354.998	-3198.23	353.527	-3181.21	0	353.527	-3181.21	-27.2342	-129.61	-2984.53	17.7653	17.7653
15	5	-10.0061	0	-129.61	14.1539	-109.175	354.998	-3198.23	353.527	-3181.21	0	353.527	-3181.21	-27.2342	-129.61	-2984.53	17.7653	17.7653
15	6	-9.89572	0	-126.385	13.9656	-106.065	354.998	-3198.23	353.383	-3181.35	0	353.383	-3181.35	-23.9551	-126.385	-2978.31	20.4707	20.4707
15	7	-10.0381	0	-128.413	13.96	-105.779	354.998	-3198.23	353.393	-3180.28	0	353.393	-3180.28	-22.9306	-128.413	-2978.23	20.3423	20.3423
16	0	-10.1945	0	-119.355	13.1115	-98.8892	354.998	-3198.23	353.407	-3191.28	0	353.407	-3191.28	-32.9914	-119.355	-2990.22	12.8162	12.8162
16	1	-10.1945	0	-119.355	13.1115	-98.8892	354.998	-3198.23	353.407	-3191.28	0	353.407	-3191.28	-32.9914	-119.355	-2990.22	12.8162	12.8162
16	2	-10.1008	0	-118.859	13.0546	-99.6454	354.998	-3198.23	353.685	-3191.79	0	353.685	-3191.79	-33.1872	-118.859	-2990.15	13.2516	13.2516
16	3	-10.1008	0	-118.859	13.0546	-99.6454	354.998	-3198.23	353.685	-3191.79	0	353.685	-3191.79	-33.1872	-118.859	-2990.15	13.2516	13.2516
16	4	-10.0633	0	-119.304	12.8888	-97.9233	354.998	-3198.23	353.702	-3189.05	0	353.702	-3189.05	-34.1498	-119.304	-2988.8	14.0943	14.0943
16	5	-10.0633	0	-119.304	12.8888	-97.9233	354.998	-3198.23	353.702	-3189.05	0	353.702	-3189.05	-34.1498	-119.304	-2988.8	14.0943	14.0943
16	6	-10.0633	0	-119.304	12.8888	-97.9233	354.998	-3198.23	353.702	-3189.05	0	353.702	-3189.05	-34.1498	-119.304	-2988.8	14.0943	14.0943
16	7	-10.0633	0	-119.304	12.8888	-97.9233	354.998	-3198.23	353.702	-3189.05	0	353.702	-3189.05	-34.1498	-119.304	-2988.8	14.0943	14.0943
17	0	-11.1317	0	-151.01	13.9342	-107.712	354.998	-3198.23	352.162	-3163.29	0	352.162	-3163.29	-27.7558	-151.01	-2989.89	5.99673	5.99673
17	1	-11.1317	0	-151.01	13.9342	-107.712	354.998	-3198.23	352.162	-3163.29	0	352.162	-3163.29	-27.7558	-151.01	-2989.89	5.99673	5.99673
17	2	-11.1317	0	-151.01	13.9342	-107.712	354.998	-3198.23	352.162	-3163.29	0	352.162	-3163.29	-27.7558	-151.01	-2989.89	5.99673	5.99673
17	3	-11.1516	0	-151.435	13.9528	-105.904	354.998	-3198.23	352.135	-3161.08	0	352.135	-3161.08	-28.6084	-151.435	-2988.99	5.86511	5.86511
17	4	-11.1516	0	-151.435	13.9528	-105.904	354.998	-3198.23	352.135	-3161.08	0	352.135	-3161.08	-28.6084	-151.435	-2988.99	5.86511	5.86511
17	5	-11.1516	0	-151.435	13.9528	-105.904	354.998	-3198.23	352.135	-3161.08	0	352.135	-3161.08	-28.6084	-151.435	-2988.99	5.86511	5.86511
17	6	-11.1516	0	-151.435	13.9528	-105.904	354.998	-3198.23	352.135	-3161.08	0	352.135	-3161.08	-28.6084	-151.435	-2988.99	5.86511	5.86511
17	7	-11.2285	0	-152.155	13.9779	-104.068	354.998	-3198.23	352.104	-3159.3	0	352.104	-3159.3	-28.9485	-152.155	-2988.3	5.54241	5.54241
18	0	-10.93	0	-146.683	14.4	-120.724	354.998	-3198.23	353.272	-3180.69	0	353.272	-3180.69	-15.7777	-146.683	-2989.88	13.8135	13.8135
18	1	-10.93	0	-146.683	14.4	-120.724	354.998	-3198.23	353.272	-3180.69	0	353.272	-3180.69	-15.7777	-146.683	-2989.88	13.8135	13.8135
18	2	-11.0949	0	-150.751	14.3681	-122.143	354.998	-3198.23	352.848	-3177.91	0	352.848	-3177.91	-13.505	-150.751	-2989.32	13.0473	13.0473
18	3	-11.0949	0	-150.751	14.3681	-122.143	354.998	-3198.23	352.848	-3177.91	0	352.848	-3177.91	-13.505	-150.751	-2989.32	13.0473	13.0473
18	4	-11.0949	0	-150.751	14.3681	-122.143	354.998	-3198.23	352.848	-3177.91	0	352.848	-3177.91	-13.505	-150.751	-2989.32	13.0473	13.0473
18	5	-11.0949	0	-150.751	14.3681	-122.143	354.998	-3198.23	352.848	-3177.91	0	352.848	-3177.91	-13.505	-150.751	-2989.32	13.0473	13.0473
18	6	-10.4934	0	-137.165	14.4144	-120.257	354.998	-3198.23	353.382	-3187.95	0	353.382	-3187.95	-15.3395	-137.165	-2987.07	16.2253	16.2253
18	7	-10.4934	0	-137.165	14.4144	-120.257	354.998	-3198.23	353.382	-3187.95	0	353.382	-3187.95	-15.3395	-137.165	-2987.07	16.2253	16.2253
19	0	-10.4512	0	-125.926	14.454	-101.24	354.998	-3198.23	353.256	-3185.36	0	353.256	-3185.36	-31.7052	-125.926	-2989.74	18.1764	18.1764
19	1	-10.4512	0	-125.926	14.454	-101.24	354.998	-3198.23	353.256	-3185.36	0	353.256	-3185.36	-31.7052	-125.926	-2989.74	18.1764	18.1764
19	2	-10.4512	0	-125.926	14.454	-101.24	354.998	-3198.23	353.256	-3185.36	0	353.256	-3185.36	-31.7052	-125.926	-2989.74	18.1764	18.1764
19	3	-10.4512	0	-125.926	14.454	-101.24	354.998	-3198.23	353.256	-3185.36	0	353.256	-3185.36	-31.7052	-125.926	-2989.74	18.1764	18.1764
19	4	-10.3919	0	-125.51	14.4478	-101.036	354.998	-3198.23	353.263	-3184.85	0	353.263	-3184.85	-31.9159	-125.51	-2989.01	18.6594	18.6594
19	5	-10.0287	0	-117.117	14.4069	-97.771	354.998	-3198.23	353.323	-3188.78	0	353.323	-3188.78	-35.5194	-117.117	-2988.09	19.3823	19.3823
19	6	-10.0287	0	-117.117	14.4069	-97.771	354.998	-3198.23	353.323	-3188.78	0	353.323	-3188.78	-35.5194	-117.117	-2988.09	19.3823	19.3823
19	7	-10.0287	0	-117.117	14.4069	-97.771	354.998	-3198.23	353.323	-3188.78	0	353.323	-3188.78	-35.5194	-117.117	-2988.09	19.3823	19.3823
20	0	-9.74288	0	-109.412	13.8152	-109.938	354.998	-3198.23	353.749	-3209.76	0	353.749	-3209.76	-24.0714	-109.412	-2989.49	11.6292	11.6292
20	1	-9.74288	0	-109.412	13.8152	-109.938	354.998	-3198.23	353.749	-3209.76	0	353.749	-3209.76	-24.0714	-109.412	-2989.49	11.6292	11.6292
20	2	-9.74288	0	-109.412	13.8152	-109.938	354.998	-3198.23	353.749	-3209.76	0	353.749	-3209.76	-24.0714	-109.412	-2989.49	11.6292	11.6292
20	3	-9.74288	0	-109.412	13.8152	-109.938	354.998	-3198.23	353.749	-3209.76	0	353.749	-3209.76	-24.0714	-109.412	-2989.49	11.6292	11.6292
20	4	-9.60839	0	-107.792	13.8048	-109.43	354.998	-3198.23	353.843	-3209.72	0	353.843	-3209.72	-24.8725	-107.792	-2988.54	11.9516	11.9516
20	5	-9.48364	0	-104.37	13.8155	-109.346	354.998	-3198.23	353.849	-3212.88	0	353.849	-3212.88	-24.763	-104.37	-2988.16	12.5568	12.5568
20	6	-9.48364	0	-104.37	13.8155	-109.346	354.998	-3198.23	353.849	-3212.88	0	353.849	-3212.88	-24.763	-104.37	-2988.16	12.5568	12.5568
20	7	-9.48364	0	-104.37	13.8155	-109.346	354.998	-3198.23	353.849	-3212.88	0	353.849	-3212.88	-24.763	-104.37	-2988.16	12.5568	12.5568
21	0	-9.18892	0	-105.341	14.1249	-112.41	354.998	-3198.23	352.517	-3207.09	0	352.517	-3207.09	-29.2038	-105.341	-2989.12	16.4731	16.4731
21	1	-9.18892	0	-105.341	14.1249	-112.41	354.998	-3198.23	352.517	-3207.09	0	352.517	-3207.09	-29.2038	-105.341	-2989.12	16.4731	16.4731
21	2	-9.18892	0	-105.341	14.1249	-112.41	354.998	-3198.23	352.517	-3207.09	0	352.517	-3207.09	-29.2038	-105.341	-2989.12	16.4731	16.4731
21	3	-9.28878	0	-106.846	14.0363	-108.62	354.998	-3198.23	352.496	-3202.71	0	352.496	-3202.71	-31.279	-106.846	-2988.34	19.1197	19.1197
21	4	-9.28878	0	-106.846	14.0363	-108.62	354.998	-3198.23	352.496	-3202.71	0	352.496	-3202.71	-31.279	-106.846	-2988.34	19.1197	19.1197
21	5	-9.02275	0	-102.919	14.0551	-112.092	354.998	-3198.23	352.311	-3207.59	0	352.311	-3207.59	-28.9073	-102.919	-2987.11	17.7571	17.7571
21	6	-9.02275	0	-102.919	14.0551	-112.092	354.998	-3198.23	352.311	-3207.59	0	352.311	-3207.59	-28.9073	-102.919	-2987.11	17.7571	17.7571
21	7	-9.02275	0	-102.919	14.0551	-112.092	354.998	-3198.23	352.311	-3207.59	0	352.311	-3207.59	-28.9073	-102.919	-2987.11	17.7571	17.7571
22	0	-10.155	0	-119.758	13.3593	-106.12	354.998	-3198.23	351.175	-3193.41	0	351.175	-3193.41	-27.102	-119.758	-2989.09	5.12413	5.12413
22	1	-10.1569	0	-120.352	13.3679	-106.557	354.998	-3198.23	351.158	-3192.92	0	351.158	-3192.92	-26.7343	-120.352	-2988.85	4.90926	4.90926
22	2	-9.78145	0	-113.591	13.3093	-106.251	354.998	-3198.23	351.203	-3197.09	0	351.203	-3197.09	-26.7038	-113.591	-2986.18	6.6726	6.6726
22	3	-9.78145	0	-113.591	13.3093	-106.251	354.998	-3198.23	351.203	-3197.09	0	351.203	-3197.09	-26.7038	-113.591	-2986.18	6.6726	6.6726
22	4	-9.78145	0	-113.591	13.3093	-106.251	354.998	-3198.23	351.203	-3197.09	0	351.203	-3197.09	-26.7038	-113.591	-2986.18	6.6726	6.6726
22	5	-10.1252	0	-124.364	13.2833	-114.542	354.998	-3198.23	351.173	-3194.34	0	351.173	-3194.34	-11.4431	-124.364	-2978.97	6.50297	6.50297
22	6	-10.1134	0	-124.443	13.2925	-114.546	354.998	-3198.23	351.164	-3194	0	351.164	-3194	-11.4745	-124.443	-2978.75	6.48594	6.48594
22	7	-9.65685	0	-118.305	13.2616	-114.45	354.998	-3198.23	351.19	-3196.02	0	351.19	-3196.02	-11.3768	-118.305	-2974.51	8.48297	8.48297
23	0	-8.96189	0	-100.458	12.6298	-94.864	354.998	-3198.23	353.317	-3196.93	0	353.317	-3196.93	-44.048	-100.458	-2988.12	13.9153	13.9153
23	1	-8.96189	0	-100.458	12.6298	-94.864	354.998	-3198.23	353.317	-3196.93	0	353.317	-3196.93	-44.048	-100.458	-2988.12	13.9153	13.9153
23	2	-8.96189	0	-100.458	12.6298	-94.864	354.998	-3198.23	353.317	-3196.93	0	353.317	-3196.93	-44.048	-100.458	-2988.12	13.9153	13.9153
23	3	-8.97545	0	-100.636	12.6821	-94.8909	354.998	-3198.23	353.393	-3196.94	0	353.393	-3196.94	-43.8337	-100.636	-2988.02	13.7699	13.7699
23	4	-8.97545	0	-100.636	12.6821	-94.8909	354.998	-3198.23	353.393	-3196.94	0	353.393	-3196.94	-43.8337	-100.636	-2988.02	13.7699	13.7699
23	5	-9.01225	0	-101.109	12.7406	-94.9591	354.998	-3198.23	353.459	-3196.89	0	353.459	-3196.89	-43.3912	-101.109	-2987.93	13.6694	13.6694
23	6	-9.01225	0	-101.109	12.7406	-94.9591	354.998	-3198.23	353.459	-3196.89	0	353.459	-3196.89	-43.3912	-101.109	-2987.93	13.6694	13.6694
23	7	-9.01225	0	-101.109	12.7406	-94.9591	354.998	-3198.23	353.459	-3196.89	0	353.459	-3196.89	-43.3912	-101.109	-2987.93	13.6694	13.6694
24	0	-9.37184	0	-107.255	13.5741	-108.916	354.998	-3198.23	355.145	-3208.54	0	355.145	-3208.54	-27.3334	-107.255	-2987.98	21.7332	21.7332
24	1	-9.37184	0	-107.255	13.5741	-108.916	354.998	-3198.23	355.145	-3208.54	0	355.145	-3208.54	-27.3334	-107.255	-2987.98	21.7332	21.7332
24	2	-9.37184	0	-107.255	13.5741	-108.916	354.998	-3198.23	355.145	-3208.54	0	355.145	-3208.54	-27.3334	-107.255	-2987.98	21.7332	21.7332
24	3	-9.29353	0	-106.832	13.5848	-107.627	354.998	-3198.23	355.191	-3206.68	0	355.191	-3206.68	-27.4567	-106.832	-2985.78	21.9042	21.9042
24	4	-9.29353	0	-106.832	13.5848	-107.627	354.998	-3198.23	355.191	-3206.68	0	355.191	-3206.68	-27.4567	-106.832	-2985.78	21.9042	21.9042
24	5	-9.29353	0	-106.832	13.5848	-107.627	354.998	-3198.23	355.191	-3206.68	0	355.191	-3206.68	-27.4567	-106.832	-2985.78	21.9042	21.9042
24	6	-9.04084	0	-101.562	13.5582	-108.17	354.998	-3198.23	355.119	-3211.17	0	355.119	-3211.17	-27.5798	-101.562	-2985.19	23.5556	23.5556
24	7	-9.04084	0	-101.562	13.5582	-108.17	354.998	-3198.23	355.119	-3211.17	0	355.119	-3211.17	-27.5798	-101.562	-2985.19	23.5556	23.5556
25	0	-9.3919	0	-112.811	14.0619	-108.15	354.998	-3198.23	352.661	-3194.92	0	352.661	-3194.92	-32.4323	-112.811	-2987.5	3.3084	3.3084
25	1	-9.3919	0	-112.811	14.0619	-108.15	354.998	-3198.23	352.661	-3194.92	0	352.661	-3194.92	-32.4323	-112.811	-2987.5	3.3084	3.3084
25	2	-9.3919	0	-112.811	14.0619	-108.15	354.998	-3198.23	352.661	-3194.92	0	352.661	-3194.92	-32.4323	-112.811	-2987.5	3.3084	3.3084
25	3	-9.3919	0	-112.811	14.0619	-108.15	354.998	-3198.23	352.661	-3194.92	0	352.661	-3194.92	-32.4323	-112.811	-2987.5	3.3084	3.3084
25	4	-9.03755	0	-107.685	13.8151	-106.424	354.998	-3198.23	352.707	-3195.78	0	352.707	-3195.78	-34.4229	-107.685	-2985.18	2.59828	2.59828
25	5	-9.03428	0	-108.008	13.8844	-107.773	354.998	-3198.23	352.617	-3196.33	0	352.617	-3196.33	-33.1283	-108.008	-2984.85	3.36637	3.36637
25	6	-9.03428	0	-108.008	13.8844	-107.773	354.998	-3198.23	352.617	-3196.33	0	352.617	-3196.33	-33.1283	-108.008	-2984.85	3.36637	3.36637
25	7	-9.03428	0	-108.008	13.8844	-107.773	354.998	-3198.23	352.617	-3196.33	0	352.617	-3196.33	-33.1283	-108.008	-2984.85	3.36637	3.36637
26	0	-9.49436	0	-113.775	13.5761	-102.795	354.998	-3198.23	353.845	-3192.33	0	353.845	-3192.33	-34.9722	-113.775	-2987.23	10.5977	10.5977
26	1	-9.49436	0	-113.775	13.5761	-102.795	354.998	-3198.23	353.845	-3192.33	0	353.845	-3192.33	-34.9722	-113.775	-2987.23	10.5977	10.5977
26	2	-9.51715	0	-114.198	13.5434	-102.072	354.998	-3198.23	353.731	-3191.2	0	353.731	-3191.2	-35.4648	-114.198	-2987.13	10.7435	10.7435
26	3	-9.51715	0	-114.198	13.5434	-102.072	354.998	-3198.23	353.731	-3191.2	0	353.731	-3191.2	-35.4648	-114.198	-2987.13	10.7435	10.7435
26	4	-9.37512	0	-112.515	13.6129	-105.454	354.998	-3198.23	353.831	-3194.91	0	353.831	-3194.91	-32.2034	-112.515	-2985.8	11.4681	11.4681
26	5	-9.37512	0	-112.515	13.6129	-105.454	354.998	-3198.23	353.831	-3194.91	0	353.831	-3194.91	-32.2034	-112.515	-2985.8	11.4681	11.4681
26	6	-9.37512	0	-112.515	13.6129	-105.454	354.998	-3198.23	353.831	-3194.91	0	353.831	-3194.91	-32.2034	-112.515	-2985.8	11.4681	11.4681
26	7	-9.37512	0	-112.515	13.6129	-105.454	354.998	-3198.23	353.831	-3194.91	0	353.831	-3194.91	-32.2034	-112.515	-2985.8	11.4681	11.4681
27	0	-8.81147	0	-92.1375	13.5164	-101.919	354.998	-3198.23	352.943	-3212.44	0	352.943	-3212.44	-35.3652	-92.1375	-2987	13.1815	13.1815
27	1	-8.81147	0	-92.1375	13.5164	-101.919	354.998	-3198.23	352.943	-3212.44	0	352.943	-3212.44	-35.3652	-92.1375	-2987	13.1815	13.1815
27	2	-8.81147	0	-92.1375	13.5164	-101.919	354.998	-3198.23	352.943	-3212.44	0	352.943	-3212.44	-35.3652	-92.1375	-2987	13.1815	13.1815
27	3	-8.82317	0	-92.8579	13.5329	-102.386	354.998	-3198.23	352.963	-3211.99	0	352.963	-3211.99	-34.4243	-92.8579	-2986.31	13.055	13.055
27	4	-8.82317	0	-92.8579	13.5329	-102.386	354.998	-3198.23	352.963	-3211.99	0	352.963	-3211.99	-34.4243	-92.8579	-2986.31	13.055	13.055
27	5	-8.82317	0	-92.8579	13.5329	-102.386	354.998	-3198.23	352.963	-3211.99	0	352.963	-3211.99	-34.4243	-92.8579	-2986.31	13.055	13.055
27	6	-9.01339	0	-96.443	13.4662	-101.167	354.998	-3198.23	352.872	-3208.3	0	352.872	-3208.3	-32.3521	-96.443	-2984.22	13.6933	13.6933
27	7	-9.01339	0	-96.443	13.4662	-101.167	354.998	-3198.23	352.872	-3208.3	0	352.872	-3208.3	-32.3521	-96.443	-2984.22	13.6933	13.6933
28	0	-10.6677	0	-140.722	14.0206	-106.99	354.998	-3198.23	352.708	-3171.6	0	352.708	-3171.6	-26.8999	-140.722	-2986.51	4.10953	4.10953
28	1	-10.6677	0	-140.722	14.0206	-106.99	354.998	-3198.23	352.708	-3171.6	0	352.708	-3171.6	-26.8999	-140.722	-2986.51	4.10953	4.10953
28	2	-10.6677	0	-140.722	14.0206	-106.99	354.998	-3198.23	352.708	-3171.6	0	352.708	-3171.6	-26.8999	-140.722	-2986.51	4.10953	4.10953
28	3	-10.6677	0	-140.722	14.0206	-106.99	354.998	-3198.23	352.708	-3171.6	0	352.708	-3171.6	-26.8999	-140.722	-2986.51	4.10953	4.10953
28	4	-10.6203	0	-139.534	13.9982	-106.615	354.998	-3198.23	352.623	-3172.19	0	352.623	-3172.19	-26.8955	-139.534	-2986	4.41079	4.41079
28	5	-10.6129	0	-139.637	14.0072	-107.1	354.998	-3198.23	352.616	-3172.37	0	352.616	-3172.37	-26.37	-139.637	-2985.76	4.51537	4.51537
28	6	-10.6129	0	-139.637	14.0072	-107.1	354.998	-3198.23	352.616	-3172.37	0	352.616	-3172.37	-26.37	-139.637	-2985.76	4.51537	4.51537
28	7	-10.6129	0	-139.637	14.0072	-107.1	354.998	-3198.23	352.616	-3172.37	0	352.616	-3172.37	-26.37	-139.637	-2985.76	4.51537	4.51537
29	0	-10.3319	0	-121.611	13.9738	-107.151	354.998	-3198.23	353.726	-3197.46	0	353.726	-3197.46	-21.1426	-121.611	-2986.49	-1.73567	-1.73567
29	1	-10.3319	0	-121.611	13.9738	-107.151	354.998	-3198.23	353.726	-3197.46	0	353.726	-3197.46	-21.1426	-121.611	-2986.49	-1.73567	-1.73567
29	2	-10.3193	0	-121.567	13.9744	-107.112	354.998	-3198.23	353.724	-3197.28	0	353.724	-3197.28	-21.2167	-121.567	-2986.34	-1.74768	-1.74768
29	3	-10.3193	0	-121.567	13.9744	-107.112	354.998	-3198.23	353.724	-3197.28	0	353.724	-3197.28	-21.2167	-121.567	-2986.34	-1.74768	-1.74768
29	4	-10.3193	0	-121.567	13.9744	-107.112	354.998	-3198.23	353.724	-3197.28	0	353.724	-3197.28	-21.2167	-121.567	-2986.34	-1.74768	-1.74768
29	5	-10.3164	0	-121.513	13.9795	-107.111	354.998	-3198.23	353.707	-3197.28	0	353.707	-3197.28	-21.2112	-121.513	-2986.3	-1.73475	-1.73475
29	6	-10.3164	0	-121.513	13.9795	-107.111	354.998	-3198.23	353.707	-3197.28	0	353.707	-3197.28	-21.2112	-121.513	-2986.3	-1.73475	-1.73475
29	7	-10.3164	0	-121.513	13.9795	-107.111	354.998	-3198.23	353.707	-3197.28	0	353.707	-3197.28	-21.2112	-121.513	-2986.3	-1.73475	-1.73475
30	0	-11.6493	0	-160.151	13.2641	-110.742	354.998	-3198.23	354.443	-3165.21	0	354.443	-3165.21	-13.5578	-160.151	-2984.48	11.3235	11.3235
30	1	-11.6493	0	-160.151	13.2641	-110.742	354.998	-3198.23	354.443	-3165.21	0	354.443	-3165.21	-13.5578	-160.151	-2984.48	11.3235	11.3235
30	2	-11.6493	0	-160.151	13.2641	-110.742	354.998	-3198.23	354.443	-3165.21	0	354.443	-3165.21	-13.5578	-160.151	-2984.48	11.3235	11.3235
30	3	-11.6422	0	-159.978	13.2504	-111.048	354.998	-3198.23	354.451	-3165.7	0	354.451	-3165.7	-13.1037	-159.978	-2984.33	11.2624	11.2624
30	4	-11.6583	0	-160.181	13.2171	-111.462	354.998	-3198.23	354.428	-3166.08	0	354.428	-3166.08	-12.4562	-160.181	-2984.29	11.1937	11.1937
30	5	-11.6583	0	-160.181	13.2171	-111.462	354.998	-3198.23	354.428	-3166.08	0	354.428	-3166.08	-12.4562	-160.181	-2984.29	11.1937	11.1937
30	6	-11.6583	0	-160.181	13.2171	-111.462	354.998	-3198.23	354.428	-3166.08	0	354.428	-3166.08	-12.4562	-160.181	-2984.29	11.1937	11.1937
30	7	-11.6583	0	-160.181	13.2171	-111.462	354.998	-3198.23	354.428	-3166.08	0	354.428	-3166.08	-12.4562	-160.181	-2984.29	11.1937	11.1937
